# Supplementary material for: ARID1A governs the silencing of sex-linked transcription during male meiosis in the mouse
Source: eLife journal article supplement (doi:10.7554/elife.88024), 2023-07-07
Supplement: fig5-figsupp1-data2 [file elife-88024-fig5-figsupp1-data2-v1.zip]

## Figure 5-Figure Supplement 1-raw source data labeled 3.pdf

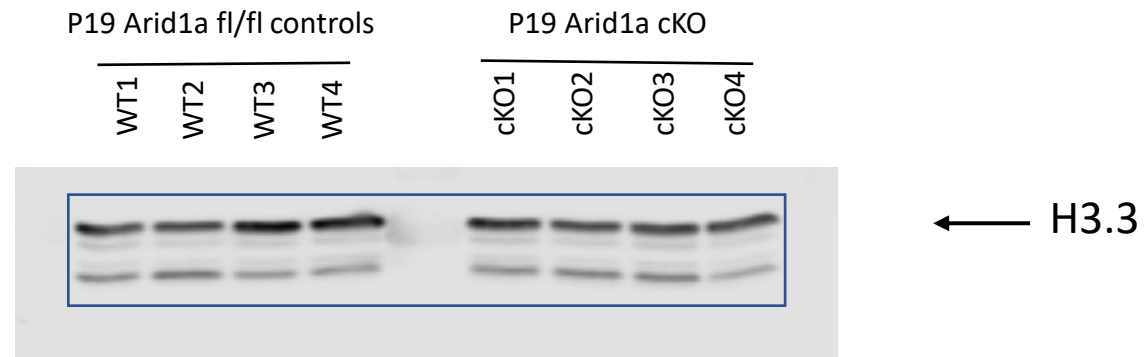

File name: Figure 5-Figure Supplement 1-raw source data labeled 3\_Panel-1\_H3.3Blot

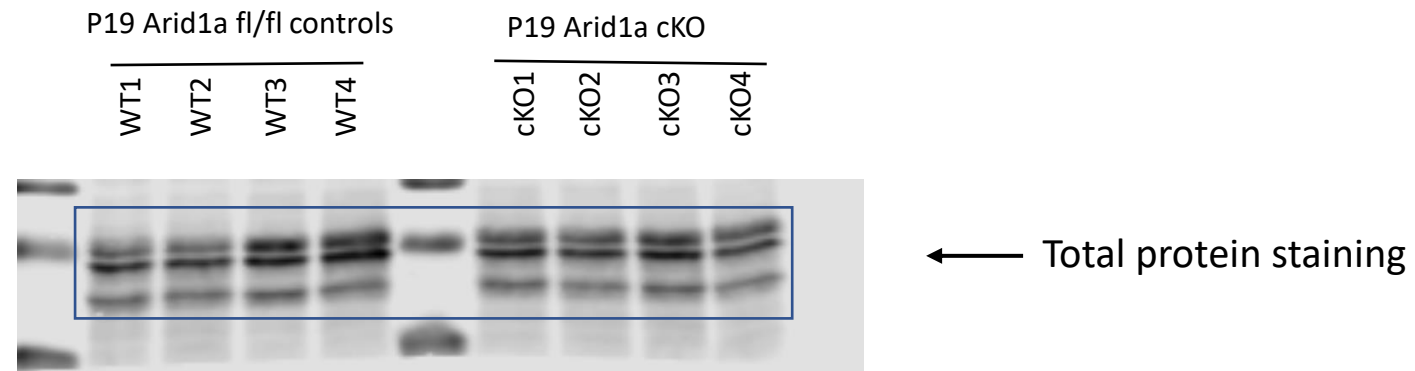

File name: Figure 5-Figure Supplement 1-raw source data labeled 3\_Panel-2\_total\_protein\_H3.3Blot
