# Supplementary material for: ARID1A governs the silencing of sex-linked transcription during male meiosis in the mouse
Source: eLife. 2024 Nov 26;12:RP88024. doi: 10.7554/eLife.88024 (PMC11594533; doi:10.7554/eLife.88024)
Supplement: Figure 2—source data 2. — Differential analysis of gene expression using DeSeq2 (Love et al., 2014) revealed an equal proportion of significantly (FDR <0.05) misexpressed genes displaying either elevated (up-regulated, n=5824) or reduced (down-regulated, n=5821) transcript abundance in Arid1a cKO relative to Arid1a WT pachytene spermatocytes. [file elife-88024-fig2-data2.xlsx]

## Sheet: ARID1A_DESeq2_DEG_list
Figure 2-Source Data 2: ARID1A DESeq2 Differentially Expressed Genes
external_gene_name	entrezgene_id	chromosome_name	baseMean	log2FoldChange	lfcSE	stat	pvalue	padj
Zglp1	100009600	9	28.5923	1.18925	0.340247	3.49526	0.000473607	0.000885466
Ldlrap1	100017	4	61.3839	0.591967	0.231821	2.55355	0.0106631	0.0171196
Mdn1	100019	4	5151.43	-0.825357	0.0896122	-9.21031	3.25174e-20	1.31396e-19
Mfap1b	100034361	2	634.322	-0.612088	0.105147	-5.82125	5.84082e-09	1.52487e-08
Tmsb15b2	100034363	X	209.448	1.71429	0.140188	12.2285	2.1904e-34	1.26009e-33
Cstdc5	100034684	16	1.95718	3.70744	1.49015	2.48796	0.0128477	0.0204207
Gm15114	100034729	X	16.0869	1.59341	0.650925	2.44792	0.0143684	0.0227006
Umad1	100036521	6	189.367	-1.33827	0.14282	-9.37032	7.23097e-21	2.99038e-20
Dnajc3	100037258	14	2465.9	-1.63262	0.0645841	-25.279	5.44027e-141	1.13557e-139
Fam129c	100037278	8	46.503	-2.44691	0.330118	-7.41224	1.24188e-13	4.01324e-13
Rsph3b	100037282	17	8317.24	-0.726591	0.0862995	-8.41941	3.78371e-17	1.39384e-16
Gm10767	100038538	13	34.329	1.43551	0.343448	4.17971	2.91879e-05	6.02689e-05
Prcd	100038570	11	18.2952	-1.31208	0.419129	-3.13049	0.00174515	0.00309045
Myocos	100038657	1	6.8493	1.38475	0.648668	2.13476	0.0327804	0.0489237
Cep85l	100038725	10	3871.62	2.2535	0.0641118	35.1495	1.18204e-270	7.83792e-269
Gm10406	100038847	14	32.4707	1.86072	0.54233	3.43097	0.000601417	0.00111508
Sirpb1c	100038947	3	42.5735	1.01809	0.259002	3.93081	8.46598e-05	0.000168536
Gm1979	100038949	5	70.5352	3.054	0.309213	9.87668	5.25439e-23	2.2991e-22
Gm1993	100038977	X	125.471	2.67195	0.190416	14.0322	9.90871e-45	6.99359e-44
Gm2012	100039030	X	913.396	2.87296	0.107695	26.6769	8.71602e-157	2.10305e-155
Gm10471	100039045	5	61.9248	3.43939	0.320196	10.7415	6.49832e-27	3.16273e-26
Gm2026	100039060	2	6.5662	6.2461	1.4797	4.22119	2.4302e-05	5.05113e-05
Gm2030	100039065	X	73.3637	2.90908	0.2338	12.4426	1.53433e-35	9.00285e-35
Gm2042	100039087	12	6.88729	2.57383	0.911798	2.82281	0.00476054	0.00799072
Gm14525	100039120	X	223.086	2.83635	0.19758	14.3555	9.84612e-47	7.19113e-46
Ccdc152	100039139	15	73.7396	1.17973	0.207471	5.68625	1.29862e-08	3.33214e-08
Tmem254c	100039192	14	28.2426	2.16047	0.620041	3.48441	0.000493227	0.000920488
Gm10058	100039240	X	5.88149	6.09676	1.48784	4.09773	4.17218e-05	8.50542e-05
Plac9b	100039246	14	45.5963	2.58741	0.545915	4.73959	2.1415e-06	4.80375e-06
H2ab1	100039319	X	16.7335	3.12229	0.520877	5.99429	2.04375e-09	5.46839e-09
Gm10487	100039467	X	2285.44	2.57624	0.100609	25.6066	1.28817e-144	2.77761e-143
Tgif2lx2	100039551	X	826.599	2.69408	0.0836998	32.1874	2.65168e-227	1.17514e-225
Gm20806	100039574	Y	62.8809	2.70891	0.280003	9.67457	3.86717e-22	1.65677e-21
Gm20809	100039614	Y	7.32242	2.64106	1.17377	2.25008	0.0244442	0.0373142
Msmp	100039672	4	5.11345	1.76975	0.771608	2.29359	0.0218141	0.0335476
Mthfsl	100039707	9	54.6511	-0.560406	0.254399	-2.20286	0.0276047	0.0417502
Gm20815	100039753	Y	87.6777	2.72244	0.615506	4.4231	9.72969e-06	2.08774e-05
Ildr2	100039795	1	20.4814	0.918008	0.384808	2.38563	0.01705	0.0266131
Gm20816	100039810	Y	1279.31	2.93299	0.115057	25.4916	2.4411e-143	5.18123e-142
Gm15093	100039890	X	360.271	1.29945	0.130821	9.93303	2.99017e-23	1.32083e-22
Rhox2b	100039913	X	8.93396	2.79294	0.909801	3.06984	0.00214176	0.00375437
Gfy	100039953	7	70.8126	-1.40567	0.35352	-3.9762	7.00246e-05	0.000140495
Tmem35b	100039968	4	131.734	-2.17216	0.18407	-11.8007	3.869e-32	2.12988e-31
Gm20823	100040031	Y	676.609	2.99884	0.10476	28.6258	3.20538e-180	9.36034e-179
Ccl27b	100040048	4	2169.74	-0.774637	0.0581489	-13.3216	1.73345e-40	1.13156e-39
Ccl27a	100040048	4	2169.74	-0.774637	0.0581489	-13.3216	1.73345e-40	1.13156e-39
Gm20831	100040223	Y	238.525	2.71281	0.169114	16.0413	6.5717e-58	5.74674e-57
Btbd35f2	100040482	X	158.855	3.28239	0.274576	11.9544	6.15888e-33	3.44749e-32
Dynlt1f	100040531	17	9337.56	0.252765	0.088204	2.86569	0.00416108	0.00703307
Btbd35f5	100040533	X	76.0945	2.88299	0.968264	2.97748	0.0029063	0.00501727
Dynlt1c	100040563	17	94.1654	-2.99734	0.304858	-9.83192	8.20427e-23	3.58097e-22
Gm15319	100040599	8	1710.8	1.99299	0.162718	12.2481	1.71918e-34	9.91914e-34
Btbd35f12	100040606	X	40.8558	2.6987	0.958739	2.81484	0.00488013	0.00817977
Gm2897	100040671	14	55.1626	3.05018	0.311216	9.80082	1.11678e-22	4.85404e-22
Btbd35f13	100040722	X	21.4893	4.01216	1.72396	2.32729	0.0199498	0.0308337
Btbd35f14	100040732	X	16.3601	2.56545	0.815326	3.14653	0.00165218	0.0029326
Mroh2a	100040766	1	8029.31	-0.895787	0.0788787	-11.3565	6.88407e-30	3.6105e-29
Gm20852	100040786	Y	454.057	3.00858	0.160523	18.7424	2.23495e-78	2.56808e-77
Gm16405	100040867	X	2370.12	2.85327	0.0701896	40.6508	0	0
Cldn34b1	100040937	X	183.553	2.63786	0.15971	16.5166	2.7888e-61	2.56059e-60
Iqcf6	100041096	9	193.636	1.86827	0.145714	12.8216	1.24192e-37	7.65906e-37
Gm3636	100041151	14	78.6333	2.66986	0.266909	10.0029	1.48028e-23	6.60323e-23
Gm3264	100041306	14	58.7337	2.49229	0.270741	9.20544	3.40266e-20	1.37305e-19
Zfp980	100041379	4	52.8346	-0.846031	0.228054	-3.70978	0.000207436	0.000399602
Zfp981	100041433	4	95.3458	-1.59378	0.196263	-8.12062	4.63816e-16	1.65068e-15
Gm3376	100041505	Y	92.2227	0.961128	0.268046	3.58568	0.000336195	0.000636587
Gm3383	100041515	14	86.5911	1.15712	0.256378	4.51333	6.38177e-06	1.39016e-05
Gm3402	100041548	5	136.559	2.35283	0.489825	4.80341	1.55986e-06	3.53636e-06
Gm3404	100041554	5	247.628	2.14426	0.137634	15.5795	1.00407e-54	8.38136e-54
Gm3409	100041566	5	50.8966	2.09047	0.544452	3.83958	0.000123246	0.000241643
Gm20878	100041579	4	1791.32	1.11688	0.0925122	12.0728	1.46973e-33	8.30338e-33
Amd2	100041585	10	225.9	-2.01594	0.197763	-10.1937	2.11532e-24	9.64831e-24
Gm3417	100041586	17	3396.79	0.297533	0.0915083	3.25143	0.00114825	0.00206916
Zfp984	100041677	4	125.393	-0.767882	0.173129	-4.43533	9.19321e-06	1.97695e-05
1700049E17Rik2	100041722	14	279.344	-1.05957	0.152418	-6.95171	3.60879e-12	1.09518e-11
Gm10413	100041774	14	314.348	3.29395	0.368692	8.93416	4.10299e-19	1.60427e-18
Gm3558	100041874	14	178.922	1.85479	0.169127	10.9668	5.5182e-28	2.76427e-27
Sap18b	100041953	8	934.341	0.766145	0.0956551	8.00945	1.15219e-15	4.04826e-15
Gm3604	100041979	13	68.3896	-1.30334	0.229039	-5.69046	1.26699e-08	3.25333e-08
Gm10377	100042055	14	3092.01	3.2477	0.076584	42.407	0	0
Gm10488	100042109	X	1619.69	3.16424	0.228862	13.8259	1.77759e-43	1.22473e-42
Gm3696	100042149	14	176.877	3.55914	1.20877	2.94443	0.00323555	0.00555305
Gm10230	100042175	X	3160.8	2.94429	0.102169	28.8179	1.27866e-182	3.82254e-181
Btbd35f4	100042254	X	67.7621	2.76093	0.943564	2.92606	0.00343283	0.00587448
Btbd35f27	100042275	X	42.312	2.62928	0.347109	7.5748	3.59682e-14	1.1867e-13
Gm10639	100042314	9	2.66657	-3.92461	1.44234	-2.721	0.00650841	0.0107346
Gm10375	100042342	14	166.436	3.69796	0.238778	15.487	4.24691e-54	3.51181e-53
Smim17	100042450	7	173.68	-1.8364	0.201551	-9.11134	8.13678e-20	3.24625e-19
Nhsl2	100042480	X	39.4536	0.874732	0.367013	2.38338	0.0171543	0.0267617
Vmn2r55	100042499	7	14.7707	1.09784	0.434849	2.52464	0.0115818	0.0185254
Vmn2r31	100042591	7	89.6736	-1.47344	0.251859	-5.85027	4.9078e-09	1.28586e-08
Olfr1565	100042690	2	49.3892	0.685554	0.267638	2.56149	0.0104223	0.0167622
Fthl17d	100042782	X	14.1771	1.76442	0.62308	2.83177	0.00462908	0.0077819
Prdm11	100042784	2	294.018	-0.443185	0.112208	-3.94966	7.82609e-05	0.000156327
H2al2b	100042840	Y	7.26361	3.85986	0.897917	4.29868	1.7182e-05	3.61814e-05
H2al1a	100042922	X	316.439	2.12193	0.129038	16.4442	9.22528e-61	8.37013e-60
H2al1b	100042927	X	103.356	2.66326	0.225142	11.8293	2.7558e-32	1.52134e-31
H2al1d	100042931	X	19.5544	7.82827	2.48662	3.14815	0.00164305	0.00291756
H2al1g	100042943	X	335.349	2.56289	0.13703	18.703	4.67621e-78	5.35578e-77
Cyp2c69	100043108	19	5.24838	1.9817	0.806851	2.45608	0.014046	0.0222251
9130023H24Rik	100043133	7	200.098	1.472	0.125783	11.7027	1.23505e-31	6.7338e-31
Gm4297	100043216	X	55.7678	3.00696	0.364151	8.25747	1.48787e-16	5.37989e-16
Nps	100043254	7	98.0574	-1.44393	0.182567	-7.90905	2.59358e-15	8.96971e-15
Gm14308	100043381	2	241.065	-1.00638	0.130575	-7.70729	1.2852e-14	4.3153e-14
Gm14305	100043387	2	25.8304	-1.00059	0.364746	-2.74326	0.00608325	0.0100786
Gm10681	100043456	3	3.37549	3.76433	1.30548	2.88349	0.00393294	0.00667197
Zfp955b	100043468	17	652.998	-0.956294	0.101937	-9.38119	6.52292e-21	2.70074e-20
Srcap	100043597	7	2518.43	-1.22761	0.115885	-10.5933	3.20089e-26	1.52835e-25
Amy2a2	100043688	3	91.5887	2.26134	0.258934	8.7333	2.47354e-18	9.46177e-18
Zfp831	100043757	2	15.3767	1.6937	0.50218	3.37269	0.000744366	0.00136719
Zfp850	100043772	7	436.719	-0.483163	0.107968	-4.47507	7.63873e-06	1.65336e-05
Klrb1	100043861	6	26.6615	0.822263	0.32631	2.51988	0.0117394	0.0187672
Tgfbr3l	100044509	8	70.1959	-0.814591	0.238745	-3.41198	0.000644935	0.00119251
Cfap43	100048534	19	9927.67	0.185344	0.0537698	3.447	0.000566854	0.0010531
Ddx43	100048658	9	543.812	-1.53511	0.102456	-14.9831	9.46886e-51	7.43265e-50
Yy2	100073351	X	54.8996	1.1873	0.227371	5.22185	1.77141e-07	4.27241e-07
Kti12	100087	4	203.737	0.65964	0.130156	5.06808	4.01859e-07	9.48479e-07
Zbtb48	100090	4	468.018	-0.532563	0.0860405	-6.18968	6.0286e-10	1.65575e-09
Srp54c	100101806	12	1904.2	1.77821	0.0783453	22.6971	4.78793e-114	7.93698e-113
Dnah7c	100101919	1	6084.57	-1.73886	0.059175	-29.385	8.52915e-190	2.7057e-188
Adat3	100113398	10	238.009	0.936239	0.118022	7.93278	2.14293e-15	7.45946e-15
Tdrd7	100121	4	9973.31	0.492327	0.070352	6.99805	2.59546e-12	7.9298e-12
Gpr153	100129	4	109.142	1.48432	0.279439	5.31179	1.08553e-07	2.65005e-07
Rhox3c	100135654	X	25.0361	3.35606	0.495935	6.76713	1.31361e-11	3.89599e-11
Rhox3e	100135657	X	90.7444	3.20462	0.25323	12.655	1.04974e-36	6.36049e-36
4933428G20Rik	100141474	11	340.168	0.581801	0.097624	5.95961	2.52837e-09	6.73747e-09
Shoc1	100155	4	441.047	-0.285495	0.0911382	-3.13256	0.00173292	0.00307157
Pafah2	100163	4	1391.05	-2.18554	0.150303	-14.5409	6.67393e-48	5.00063e-47
Phactr4	100169	4	508	-1.58641	0.105235	-15.0748	2.37074e-51	1.8726e-50
Ubl4a	100169864	X	69.6664	2.82314	0.241979	11.6669	1.8816e-31	1.02242e-30
Zmym6	100177	4	724.885	0.434311	0.0850559	5.10619	3.28723e-07	7.80666e-07
Akna	100182	4	1163.29	2.00654	0.0864689	23.2053	4.02417e-119	7.0415e-118
H6pd	100198	4	60.5916	-0.844487	0.226431	-3.72955	0.000191819	0.00037061
Tmem64	100201	4	1058.47	0.402766	0.0600052	6.71218	1.91732e-11	5.64474e-11
Gpn2	100210	4	372.747	-2.2942	0.105081	-21.8326	1.13679e-105	1.75115e-104
Rusc2	100213	4	1001.43	-0.403695	0.0705487	-5.72221	1.05146e-08	2.71094e-08
Ttll2	100216474	17	215.749	1.80585	0.133401	13.537	9.4563e-42	6.3011e-41
Stx12	100226	4	874.409	-1.18557	0.104149	-11.3834	5.05728e-30	2.66031e-29
Gm17359	100233207	3	1865.32	1.0994	0.0678862	16.1947	5.49754e-59	4.86531e-58
Btbd18	100270744	2	114.422	0.923834	0.169016	5.46597	4.6038e-08	1.14773e-07
Gm14139	100271882	2	12.8728	-1.88119	0.495747	-3.79466	0.000147846	0.000288144
Osbpl9	100273	4	2319.97	0.982627	0.0897005	10.9545	6.31983e-28	3.15866e-27
Dynlt1a	100310872	17	448.773	1.757	0.0885786	19.8355	1.46971e-87	1.88255e-86
AU040320	100317	4	2435.26	-0.289384	0.0666447	-4.34219	1.41068e-05	2.99057e-05
Il4i1	100328588	7	2562.78	-0.843348	0.0567252	-14.8673	5.37743e-50	4.18197e-49
Ppp1r8	100336	4	483.017	-0.599381	0.0911915	-6.57277	4.93866e-11	1.42917e-10
Smpdl3b	100340	4	17.8423	-0.910636	0.406026	-2.2428	0.0249097	0.0379837
Tent5b	100342	4	993.348	1.12696	0.0891884	12.6358	1.34103e-36	8.08378e-36
Bsdc1	100383	4	1322.77	0.901899	0.0987095	9.1369	6.42709e-20	2.5723e-19
Zfp729b	100416706	13	164.461	-0.907828	0.147082	-6.17226	6.73209e-10	1.84552e-09
Gm20594	100463512	6	1160.35	-1.60039	0.0868848	-18.4196	9.14019e-76	1.01713e-74
Zfand2a	100494	5	244.664	-1.25576	0.194858	-6.4445	1.15979e-10	3.29304e-10
Tex50	100502590	1	735.307	2.14719	0.0924108	23.2353	2.00371e-119	3.52708e-118
Rubcn	100502698	16	3584.01	-0.499252	0.0589594	-8.46773	2.50229e-17	9.2897e-17
Tsga8	100502723	X	3985.98	2.46751	0.0571098	43.2064	0	0
Epg5	100502841	18	306.147	-1.36922	0.159403	-8.58965	8.72369e-18	3.28919e-17
Gm19410	100502846	8	89.1411	1.55355	0.184487	8.42091	3.73567e-17	1.37672e-16
Ccdc13	100502861	9	4123.13	-0.392154	0.0584931	-6.70429	2.02394e-11	5.95369e-11
E330021D16Rik	100502936	6	1.89016	-3.43204	1.45155	-2.3644	0.0180591	0.0280788
Gm3336	100502950	8	4.18538	2.18253	0.97444	2.23978	0.0251052	0.0382553
Speer4c	100502967	5	314.515	2.62747	0.185451	14.168	1.44558e-45	1.03858e-44
1700015G11Rik	100503036	7	755.58	2.11195	0.0806813	26.1764	4.92941e-151	1.12623e-149
Pdzd7	100503041	19	5.93228	-1.66347	0.729669	-2.27976	0.022622	0.0347035
Klhl3	100503085	13	226.289	-0.995436	0.128299	-7.75871	8.57949e-15	2.90228e-14
Trpc5os	100503240	X	150.818	-1.24778	0.139377	-8.95257	3.47288e-19	1.36243e-18
Pifo	100503311	3	1558.43	0.610557	0.0892862	6.8382	8.01934e-12	2.40144e-11
Gm14440	100503353	2	15.7478	-1.56009	0.484631	-3.21913	0.00128579	0.00230709
Tmem95	100503361	11	387.098	2.34019	0.108411	21.5862	2.42058e-103	3.63046e-102
Tpbgl	100503386	7	135.794	-1.14959	0.155659	-7.38535	1.52049e-13	4.89835e-13
Nuggc	100503545	14	1037.2	-0.586338	0.0827209	-7.08815	1.35918e-12	4.19772e-12
Gm10354	100503549	5	473.369	2.52761	0.137187	18.4245	8.3525e-76	9.30647e-75
Zfp534	100503584	4	185.056	-0.403636	0.135684	-2.97483	0.00293154	0.00505687
Rpl5	100503670	5	458.886	-0.503318	0.100227	-5.0218	5.11906e-07	1.20114e-06
Gm5901	100503879	7	421.696	2.19285	0.136097	16.1124	2.08804e-58	1.83594e-57
Smpd5	100503915	15	5117.36	-1.64609	0.0554132	-29.7057	6.4739e-194	2.12638e-192
Gm17266	100503964	18	18.218	2.25712	0.437094	5.16391	2.41843e-07	5.78469e-07
Acp4	100503991	7	276.866	2.52353	0.126413	19.9625	1.16612e-88	1.51459e-87
Ccer2	100504112	7	1.73717	3.50474	1.48994	2.35227	0.0186594	0.0289382
Fam181a	100504156	12	1291.61	-2.63212	0.0693271	-37.9667	0	0
Prss51	100504162	14	200.612	2.21322	0.154647	14.3114	1.85833e-46	1.35108e-45
Cmtm1	100504164	8	1305.93	0.680832	0.0808155	8.42452	3.62221e-17	1.33574e-16
Mical2	100504195	7	2817.85	2.05194	0.0663503	30.9259	5.36109e-210	2.02916e-208
Efcab8	100504221	2	2852.4	-1.17738	0.0702812	-16.7524	5.44174e-63	5.11628e-62
Ccdc170	100504234	10	29.5679	-1.58532	0.337377	-4.69895	2.61509e-06	5.829e-06
Smim27	100504309	4	48.7329	-1.18218	0.348867	-3.38863	0.000702422	0.00129392
Cypt14	100504400	X	27.562	2.52049	0.373057	6.7563	1.41557e-11	4.19275e-11
Spin2d	100504429	X	51.7795	2.12544	0.26632	7.98075	1.45441e-15	5.08987e-15
Prr22	100504446	17	1866.35	2.6817	0.0897693	29.8732	4.38606e-196	1.47355e-194
Dcdc2b	100504491	4	76.2232	-3.91219	0.313868	-12.4644	1.1668e-35	6.87148e-35
3425401B19Rik	100504518	14	17.2785	1.46955	0.643411	2.284	0.0223715	0.0343389
Atg14	100504663	14	262.901	0.281409	0.114234	2.46344	0.013761	0.0218016
Tmppe	100504715	9	16.9113	-1.24814	0.506948	-2.46208	0.0138136	0.0218789
Iqschfp	100505386	3	32.6998	1.57837	0.308066	5.12349	2.99932e-07	7.14216e-07
Zfp518b	100515	5	152.464	0.638131	0.205336	3.10775	0.0018852	0.00332479
Fer1l5	100534273	1	1670.07	1.96545	0.137537	14.2903	2.51407e-46	1.82482e-45
Slc15a4	100561	5	684.536	-2.36423	0.275983	-8.56657	1.06611e-17	4.00511e-17
Lrrc8c	100604	5	233.059	1.57103	0.169372	9.27563	1.7658e-20	7.20453e-20
Noc4l	100608	5	625.39	-1.13633	0.0866912	-13.1078	2.97151e-39	1.8887e-38
N4bp2l1	100637	5	88.9675	-1.51004	0.208424	-7.24506	4.3224e-13	1.36457e-12
Trrap	100683	5	3035.34	-2.28947	0.205329	-11.1503	7.13782e-29	3.65236e-28
Pds5b	100710	5	1399.5	-0.622256	0.0632547	-9.8373	7.77705e-23	3.39618e-22
Mapre3	100732	5	2042.98	1.0628	0.0587062	18.1037	2.97957e-73	3.22415e-72
Dcun1d4	100737	5	3337.63	1.77332	0.0750081	23.6417	1.43768e-123	2.62776e-122
Usp30	100756	5	784.74	-1.07666	0.0980154	-10.9846	4.53018e-28	2.27645e-27
Rita1	100764	5	100.569	-0.723686	0.17847	-4.05494	5.01475e-05	0.000101679
Tbc1d14	100855	5	2126.52	0.874903	0.0642435	13.6186	3.10635e-42	2.08564e-41
Gm20604	100859931	12	2065.69	-0.400027	0.0670511	-5.96599	2.43149e-09	6.48519e-09
Gm3411	100861615	14	123.983	0.448424	0.191357	2.34339	0.0191093	0.0295892
Gm21119	100861668	8	909.765	2.03378	0.167074	12.1729	4.33167e-34	2.47496e-33
Gm21190	100861755	5	256.739	2.63933	0.174043	15.1648	6.04438e-52	4.83058e-51
Btbd35f23	100861966	X	73.6913	2.74091	0.256302	10.6941	1.08505e-26	5.25051e-26
Gm21379	100861987	Y	461.877	2.65593	0.102026	26.0319	2.15532e-149	4.84893e-148
Rbm31y	100861987	Y	461.877	2.65593	0.102026	26.0319	2.15532e-149	4.84893e-148
Cfap99	100862066	5	985.227	-0.170713	0.0679443	-2.51255	0.0119864	0.0191344
Btbd35f21	100862329	X	120.302	2.91913	0.225516	12.9442	2.5345e-38	1.58355e-37
Gm21671	100862359	5	29.105	2.81899	0.379503	7.4281	1.10167e-13	3.56864e-13
Gm21677	100862365	Y	349.246	1.68761	0.481786	3.50283	0.000460338	0.000861296
Entpd4b	100862375	14	594.585	-0.744394	0.121501	-6.12665	8.97478e-10	2.44626e-09
Chpf2	100910	5	150.264	-0.636124	0.146592	-4.33942	1.42857e-05	3.02704e-05
Tyw1	100929	5	771.595	-1.24989	0.127367	-9.81335	9.86351e-23	4.2935e-22
Nfxl1	100978	5	642.468	-0.330124	0.0913545	-3.61366	0.000301911	0.000573825
Akap9	100986	5	1410.25	1.71003	0.132507	12.9052	4.20678e-38	2.61818e-37
Lipo2	101055671	19	62.7339	0.526113	0.209578	2.51035	0.0120612	0.0192452
Gm4513	101055864	7	8.92378	2.73476	0.675021	4.05137	5.09188e-05	0.000103148
Gm14569	101055983	X	896.671	-1.68813	0.100245	-16.84	1.24151e-63	1.1811e-62
Zfp990	101056073	4	1615.38	-0.52187	0.102946	-5.06937	3.99132e-07	9.42548e-07
Zfp282	101095	6	57.0691	-0.915775	0.262674	-3.48635	0.000489651	0.000914008
Ttll3	101100	6	1347.83	1.84393	0.0942318	19.5681	2.89489e-85	3.60849e-84
Tmem168	101118	6	508.442	-1.82499	0.10631	-17.1666	4.72449e-66	4.69468e-65
Parp11	101187	6	900.464	1.19276	0.0825212	14.454	2.36651e-47	1.75233e-46
Zfp956	101197	6	3639.76	-2.0936	0.0908428	-23.0464	1.59692e-117	2.73992e-116
Hepacam2	101202	6	106.056	-3.96476	0.270588	-14.6524	1.30051e-48	9.85329e-48
Tada3	101206	6	2102.17	-0.241651	0.0541153	-4.46548	7.98896e-06	1.72598e-05
Tra2a	101214	6	1744.46	-1.70876	0.100207	-17.0523	3.35926e-65	3.2917e-64
Brk1	101314	6	567.615	-0.89595	0.0808916	-11.0759	1.64145e-28	8.3291e-28
Dyrk4	101320	6	546.574	1.57412	0.099042	15.8935	7.03008e-57	6.05748e-56
Fbxl14	101358	6	263.215	-0.901143	0.111502	-8.08185	6.37893e-16	2.25745e-15
Prrt4	101359	6	17.7257	-1.37733	0.40842	-3.37233	0.000745351	0.00136886
Adamts9	101401	6	49.25	0.500852	0.233987	2.14052	0.0323131	0.0482835
Phrf1	101471	7	2057.08	-0.582584	0.0766658	-7.59901	2.98398e-14	9.8653e-14
Slco2b1	101488	7	8.30117	2.2728	0.832344	2.73061	0.00632181	0.0104506
Ric8a	101489	7	393.183	-1.35029	0.129806	-10.4024	2.41666e-25	1.12795e-24
Inpp5f	101490	7	216.817	0.519114	0.180176	2.88115	0.00396229	0.00671602
Plekhg2	101497	7	328.528	0.762782	0.167334	4.55844	5.15339e-06	1.12746e-05
Mob2	101513	7	258.202	-0.625569	0.120587	-5.18769	2.12913e-07	5.10934e-07
Prkd2	101540	7	68.8653	1.51432	0.25514	5.93527	2.93361e-09	7.79378e-09
Ccp110	101565	7	7124.2	-2.94414	0.0651958	-45.1585	0	0
Vrk3	101568	7	2598.61	-0.259217	0.0675115	-3.8396	0.000123236	0.000241643
Efl1	101592	7	2058.58	1.66363	0.0713576	23.314	3.19356e-120	5.66111e-119
AI467606	101602	7	178.474	-4.2801	0.215748	-19.8384	1.38802e-87	1.7805e-86
E430018J23Rik	101604	7	52.1227	0.97249	0.24492	3.97064	7.16794e-05	0.000143668
Pwwp2b	101631	7	3110.48	2.11963	0.0553743	38.2781	0	0
Spty2d1	101685	7	608.592	-0.390587	0.0723311	-5.39999	6.66433e-08	1.64606e-07
Trim68	101700	7	85.4254	-0.603535	0.187314	-3.22205	0.00127277	0.00228444
Numa1	101706	7	1566.55	-0.759094	0.0651882	-11.6446	2.44335e-31	1.32236e-30
Psip1	101739	4	16433.5	-1.17528	0.0604349	-19.447	3.08696e-84	3.789e-83
Acp7	101744	7	13.0017	-3.11581	0.728536	-4.27681	1.89588e-05	3.98041e-05
Ano1	101772	7	342.824	0.404039	0.179104	2.25589	0.0240777	0.0368009
Spred3	101809	7	460.308	1.10941	0.173215	6.4048	1.50571e-10	4.25263e-10
Faap24	101831	7	149.67	-1.12063	0.220867	-5.07376	3.90034e-07	9.22051e-07
Ints4	101861	7	1422.14	-0.253617	0.0877931	-2.8888	0.00386716	0.00656929
Unc45a	101869	7	179.611	1.02217	0.141651	7.21612	5.34915e-13	1.68149e-12
Sf3b3	101943	8	1351.25	-0.90023	0.0604132	-14.9012	3.23685e-50	2.52841e-49
Usb1	101985	8	529.875	0.32692	0.0893221	3.66001	0.000252203	0.000482625
Champ1	101994	8	283.2	-0.804764	0.107343	-7.49713	6.52278e-14	2.13211e-13
Smim19	102032	8	174.412	-0.339853	0.156189	-2.17591	0.0295618	0.0444473
Exoc8	102058	8	999.733	-1.55347	0.078545	-19.7782	4.59224e-87	5.85668e-86
Gadd45gip1	102060	8	199.035	-0.560425	0.128264	-4.36929	1.24651e-05	2.65562e-05
Plekhg4	102075	8	579.077	-1.91006	0.118101	-16.1732	7.79367e-59	6.88356e-58
Phkb	102093	8	212.95	-0.699116	0.222556	-3.1413	0.00168199	0.0029837
Arhgef18	102098	8	304.029	-1.32129	0.115549	-11.4349	2.79825e-30	1.48126e-29
Enkd1	102124	8	2117.11	-0.385116	0.0582517	-6.61125	3.81095e-11	1.10883e-10
Snx25	102141	8	2200.03	-0.951843	0.0979892	-9.71376	2.6344e-22	1.13386e-21
Taf5l	102162	8	962.412	1.11294	0.0854247	13.0284	8.43946e-39	5.32386e-38
Prmt9	102182	8	181.282	-0.550358	0.128644	-4.27816	1.88446e-05	3.95786e-05
Zdhhc7	102193	8	519.852	-0.259711	0.10803	-2.40407	0.0162139	0.0254092
Snapc2	102209	8	199.935	-1.20827	0.130296	-9.27325	1.80564e-20	7.36366e-20
Gpat4	102247	8	7992.63	0.720286	0.0733407	9.82109	9.13473e-23	3.9802e-22
Lbhd1	102308570	19	42.3232	-1.17289	0.269677	-4.34923	1.36616e-05	2.90178e-05
Dcun1d2	102323	8	124.726	-0.860876	0.205203	-4.19524	2.7258e-05	5.64293e-05
Ankrd10	102334	8	1488.9	-2.67058	0.0872969	-30.5919	1.5686e-205	5.68109e-204
Cog4	102339	8	1960.36	-0.501908	0.0999049	-5.02386	5.06427e-07	1.1886e-06
Myzap	102371	9	60.3196	-1.15164	0.234636	-4.90821	9.19133e-07	2.11917e-06
Clk3	102414	9	2435.22	0.633952	0.0603797	10.4994	8.69112e-26	4.10096e-25
Hinfp	102423	9	360.069	-0.4725	0.109519	-4.31432	1.60095e-05	3.37932e-05
Dennd4a	102442	9	562.439	0.712646	0.197567	3.60711	0.000309622	0.000588228
Xndc1	102443350	7	824.406	0.472605	0.0867827	5.44585	5.156e-08	1.28123e-07
Xntrpc	102443351	7	95.5691	0.773987	0.187204	4.13446	3.55792e-05	7.29874e-05
Xylb	102448	9	83.7487	0.462316	0.197629	2.33931	0.0193196	0.0299043
Imp3	102462	9	240.122	-0.61288	0.123536	-4.96113	7.00843e-07	1.62865e-06
Pls1	102502	9	95.6055	0.57991	0.194792	2.97708	0.00291008	0.00502279
Ano10	102566	9	1572.31	-1.00494	0.0979369	-10.2611	1.05474e-24	4.84973e-24
Alg9	102580	9	832.902	-0.706398	0.0965186	-7.31878	2.50243e-13	7.9902e-13
Plekho2	102595	9	340.344	1.38452	0.124904	11.0847	1.48886e-28	7.56133e-28
Snx19	102607	9	1903.82	-1.63585	0.0789348	-20.7241	2.10081e-95	2.93846e-94
Mapkapk3	102626	9	47.0573	-0.88079	0.297246	-2.96317	0.00304486	0.00524004
4930512M02Rik	102631730	11	151.953	1.83871	0.238713	7.70258	1.33343e-14	4.47301e-14
Acad11	102632	9	558.732	-1.31084	0.0833379	-15.7292	9.53912e-56	8.12023e-55
Rnf212b	102632837	14	55.1595	1.13209	0.246872	4.58576	4.52344e-06	9.93333e-06
Gm28729	102635744	9	177.375	2.17853	0.161486	13.4906	1.77749e-41	1.1804e-40
Acte1	102636989	7	573.464	1.9696	0.0902057	21.8346	1.08933e-105	1.67951e-104
Gm10037	102637366	13	55.8158	2.2437	0.259489	8.6466	5.30561e-18	2.01162e-17
Ccdc188	102638083	16	801.434	1.83418	0.0716274	25.6072	1.26674e-144	2.73473e-143
Gm35060	102638514	18	207.803	2.12392	0.159655	13.3031	2.21923e-40	1.44438e-39
Tle7	102638837	8	16.0853	2.11337	0.506094	4.17584	2.96885e-05	6.12737e-05
Gm35549	102639178	9	137.527	2.25254	0.159374	14.1337	2.35528e-45	1.68598e-44
Gm14296	102639598	2	174.63	-0.616902	0.160161	-3.85177	0.000117269	0.000230538
Gm36028	102639802	16	12.0566	-1.89717	0.54124	-3.50523	0.00045622	0.000853774
Slc6a20a	102680	9	42.7182	1.87266	0.296804	6.30943	2.80072e-10	7.81507e-10
Bbs4	102774	9	629.185	-0.694045	0.0932824	-7.44026	1.0049e-13	3.25935e-13
Tcta	102791	9	684.795	-1.75231	0.109687	-15.9755	1.89185e-57	1.64864e-56
Slc6a8	102857	X	50.0225	1.81766	0.245595	7.40102	1.35139e-13	4.36074e-13
Pls3	102866	X	100.698	-0.916874	0.194669	-4.70991	2.47821e-06	5.53721e-06
Gm21992	102902673	19	92.2607	-0.504928	0.234085	-2.15703	0.0310035	0.0464841
Cenpi	102920	X	315.674	2.2601	0.119423	18.9252	7.078e-80	8.27314e-79
AU022751	102991	X	40.9428	1.13468	0.322878	3.51426	0.000440983	0.00082631
Pan2	103135	10	1203.99	-1.29879	0.0845281	-15.3652	2.80059e-53	2.28795e-52
Pwp1	103136	10	701.15	-1.35419	0.112598	-12.0268	2.5707e-33	1.44816e-32
Gstt3	103140	10	913.661	-1.39824	0.0930315	-15.0297	4.68861e-51	3.69351e-50
Rdh9	103142	10	33.9651	0.640617	0.285454	2.24421	0.024819	0.0378552
Upb1	103149	10	52.358	-1.0578	0.495434	-2.13511	0.0327524	0.0488903
Chchd10	103172	10	188.029	-0.952978	0.138706	-6.87049	6.3982e-12	1.92317e-11
Ttc41	103220	10	2536.78	0.856184	0.0702927	12.1803	3.95948e-34	2.26671e-33
Csnk1g2	103236	10	5638.31	1.76636	0.0503207	35.1021	6.26995e-270	4.11113e-268
Cep57l1	103268	10	1318.88	0.77305	0.0665978	11.6077	3.76427e-31	2.02669e-30
Ncln	103425	10	1493.14	-1.45858	0.0719245	-20.2794	1.95658e-91	2.62036e-90
Nt5dc3	103466	10	273.298	-0.625508	0.127807	-4.89415	9.87297e-07	2.27188e-06
Nup107	103468	10	1011.55	-0.929119	0.137041	-6.77988	1.20272e-11	3.57551e-11
Mgat4b	103534	11	166.899	-1.23457	0.151902	-8.1274	4.38582e-16	1.56277e-15
Mbtd1	103537	11	3491.9	-0.816812	0.0745012	-10.9638	5.70832e-28	2.8587e-27
Epop	103551	11	26.1109	0.715868	0.325454	2.1996	0.0278354	0.0420559
Psme4	103554	11	15910.7	0.540184	0.0530152	10.1892	2.21531e-24	1.00966e-23
Xpo1	103573	11	3081.71	-1.01851	0.0577173	-17.6465	1.08271e-69	1.12467e-68
Tmed4	103694	11	2382.29	-2.1893	0.0953138	-22.9694	9.42906e-117	1.60376e-115
Pnpo	103711	11	34.6186	0.866902	0.273029	3.17512	0.00149772	0.00266756
Tbc1d10a	103724	11	567.861	-0.369447	0.0785334	-4.70433	2.547e-06	5.68587e-06
Tubg1	103733	11	364.152	0.647942	0.0933181	6.94337	3.82858e-12	1.16068e-11
Pex12	103737	11	705.421	1.12973	0.0705296	16.0178	9.60282e-58	8.38487e-57
Mien1	103742	11	433.364	-0.615947	0.103137	-5.97212	2.34184e-09	6.24891e-09
Tmem98	103743	11	52.4033	-0.883907	0.242012	-3.65233	0.000259867	0.000496536
Tubg2	103768	11	10.5849	2.30877	0.665619	3.46861	0.000523159	0.000974597
Slc25a41	103775	17	204.448	1.82184	0.133489	13.6479	2.07922e-42	1.40135e-41
Wdr92	103784	11	487.386	-2.26815	0.13586	-16.6948	1.42945e-62	1.33612e-61
Maml1	103806	11	220.032	0.996662	0.121627	8.19441	2.5183e-16	9.03166e-16
Nt5m	103850	11	1014.49	-0.861338	0.0929562	-9.26606	1.93155e-20	7.86988e-20
Rpn1	103963	6	7362.53	-1.14657	0.0862839	-13.2883	2.70651e-40	1.76023e-39
Try5	103964	6	88.0908	2.56059	0.211016	12.1346	6.92861e-34	3.94597e-33
Dnm3	103967	1	774.641	-0.937379	0.0908683	-10.3158	5.97836e-25	2.76327e-24
Gpc5	103978	14	21.3776	2.0709	0.406132	5.09909	3.41295e-07	8.09979e-07
Gck	103988	11	56.0398	1.53298	0.247421	6.19585	5.79699e-10	1.59313e-09
Rtn1	104001	12	1147.88	0.193331	0.0674038	2.86825	0.00412746	0.00698237
Qsox1	104009	1	1661.54	-1.16586	0.0592588	-19.674	3.60147e-86	4.53734e-85
Synj1	104015	16	900.094	-0.195132	0.0889599	-2.19348	0.0282725	0.0426469
Wdr7	104082	18	1740.37	-1.63373	0.0762744	-21.419	8.8803e-102	1.31622e-100
Cyp27a1	104086	1	12.0209	1.76097	0.496284	3.54832	0.000387698	0.000729954
Itga9	104099	9	56.3661	1.92847	0.25185	7.65722	1.89995e-14	6.32289e-14
Adcy3	104111	12	93.0074	0.883457	0.188298	4.6918	2.70814e-06	6.03185e-06
Acly	104112	11	1147.27	-0.586591	0.0702791	-8.34659	7.02604e-17	2.56681e-16
Etv5	104156	16	197.422	-1.0577	0.125537	-8.4254	3.59526e-17	1.32608e-16
Ces1d	104158	8	16.065	-1.25181	0.558475	-2.24149	0.0249945	0.0380998
Gldc	104174	19	278.956	-1.80058	0.124086	-14.5107	1.03604e-47	7.73327e-47
Sbk1	104175	7	319.577	-1.09051	0.139863	-7.79697	6.3411e-15	2.15707e-14
Blmh	104184	11	279.226	-0.479083	0.186943	-2.56273	0.0103854	0.0167087
Rhoq	104215	17	33.1149	1.92133	0.571748	3.36045	0.000778143	0.00142626
Kdm3a	104263	6	7163.21	-1.17548	0.0466377	-25.2045	3.57177e-140	7.41163e-139
Tex15	104271	8	3791.05	2.29034	0.0653306	35.0577	2.9806e-269	1.93278e-267
Csnk1d	104318	11	3819.48	0.754953	0.0530082	14.2422	5.01305e-46	3.62526e-45
Zfp120	104348	2	50.8984	1.02053	0.263261	3.87648	0.000105976	0.000209248
Meig1	104362	2	22989.8	0.503487	0.0742454	6.78139	1.19025e-11	3.53965e-11
Rcor2	104383	19	190.581	0.599474	0.140225	4.27509	1.9106e-05	4.00989e-05
E2f4	104394	8	685.098	-0.313167	0.0715326	-4.37796	1.19795e-05	2.55587e-05
Pcnx3	104401	19	1492.54	-0.980869	0.125436	-7.81966	5.29671e-15	1.80843e-14
Bap1	104416	14	2990.61	0.764389	0.0569706	13.4173	4.79106e-41	3.1626e-40
Dgkz	104418	2	155.653	0.854494	0.283426	3.01487	0.00257087	0.0044653
Npffr2	104443	5	3.29703	3.07924	1.11996	2.74941	0.00597022	0.00990153
Rexo2	104444	9	1092.45	-0.489739	0.0700572	-6.99056	2.73795e-12	8.35355e-12
0610010K14Rik	104457	11	170.394	0.412633	0.16851	2.44872	0.0143366	0.0226564
Ccdc117	104479	11	2403	-1.44058	0.0629881	-22.8707	9.09233e-116	1.52734e-114
Ppp4r3b	104570	11	2846.08	-0.673498	0.111009	-6.06707	1.30266e-09	3.51966e-09
Mycbpap	104601	11	2311.75	1.86181	0.125053	14.8882	3.93237e-50	3.06357e-49
Tsr1	104662	11	451.418	-0.570459	0.0945567	-6.03298	1.60961e-09	4.32712e-09
Slc16a6	104681	11	148.494	-0.75071	0.161849	-4.63833	3.51229e-06	7.76896e-06
Pik3r6	104709	11	125.511	-1.11574	0.181482	-6.14794	7.84958e-10	2.14619e-09
Ttc7b	104718	12	116.448	-0.526105	0.198924	-2.64476	0.00817494	0.0133176
Sptssa	104725	12	283.329	-1.51785	0.118048	-12.8579	7.76555e-38	4.80087e-37
Tedc1	104732	12	1308.21	-1.75719	0.104757	-16.774	3.78054e-63	3.57157e-62
Pld4	104759	12	56.0559	2.20999	0.25416	8.69525	3.46071e-18	1.31978e-17
Vipas39	104799	12	654.348	-0.902627	0.102717	-8.78753	1.52885e-18	5.88131e-18
Fancm	104806	12	334.981	-0.627024	0.253517	-2.4733	0.013387	0.0212395
Ptpn23	104831	9	1531.18	-0.476724	0.0686547	-6.94379	3.81718e-12	1.15743e-11
Cbll1	104836	12	888.528	-0.222042	0.0715831	-3.10187	0.00192299	0.003389
Tecpr2	104859	12	421.75	-0.364602	0.0860295	-4.2381	2.25418e-05	4.70017e-05
Spata7	104871	12	4737.92	2.17465	0.0550761	39.4845	0	0
Tdp1	104884	12	2253.69	0.908536	0.072223	12.5796	2.73429e-36	1.63317e-35
Tmem179	104885	12	75.6751	-0.701211	0.194897	-3.59785	0.000320856	0.000608391
Rab15	104886	12	9.62649	1.27564	0.519046	2.45766	0.0139844	0.0221356
Slc25a47	104910	12	81.1794	2.88417	0.22198	12.9929	1.34269e-38	8.4249e-38
Adi1	104923	12	128.839	-0.632319	0.17077	-3.70276	0.000213269	0.00041048
Fam110c	104943	12	11.6871	-1.49599	0.49203	-3.04044	0.0023623	0.00411926
Dnal1	105000	12	684.677	0.422856	0.0967413	4.37099	1.23682e-05	2.63561e-05
Rdh14	105014	12	342.384	-0.949194	0.122712	-7.73516	1.0327e-14	3.48209e-14
Pelo	105083	13	366.468	-0.563749	0.111432	-5.05915	4.2113e-07	9.929e-07
Iars	105148	13	1177.18	-0.465289	0.0943912	-4.92937	8.24973e-07	1.90931e-06
Arrdc3	105171	13	2569.3	-0.71882	0.0566617	-12.6862	7.05557e-37	4.28829e-36
Tmem265	105180375	7	64.7165	-1.49331	0.221262	-6.74902	1.48842e-11	4.39966e-11
Tasor2	105203	13	9256.28	2.0647	0.0486915	42.4036	0	0
Rnf44	105239	13	1742.49	0.772929	0.0839922	9.20239	3.50081e-20	1.41201e-19
Gm21083	105242399	5	403.232	2.05134	0.138987	14.7592	2.68391e-49	2.07082e-48
Slc9a3	105243	13	48.3954	-2.56731	0.302933	-8.47483	2.35424e-17	8.75297e-17
Txndc5	105245	13	186.327	-0.915344	0.134757	-6.79254	1.10173e-11	3.27862e-11
Brd9	105246	13	1341.03	-0.425725	0.082122	-5.18406	2.17109e-07	5.20719e-07
Gm42372	105247240	7	163.639	0.559183	0.163071	3.42906	0.000605666	0.00112225
Cdk20	105278	13	1155.76	-1.26729	0.0961909	-13.1748	1.22632e-39	7.86541e-39
AW209491	105351	13	267.679	-0.882889	0.135929	-6.4952	8.2925e-11	2.3744e-10
Dusp22	105352	13	644.989	0.656608	0.103232	6.3605	2.01092e-10	5.65328e-10
Slc17a3	105355	13	3.29192	2.42284	1.01017	2.39843	0.0164654	0.0257713
Utp15	105372	13	235.506	-0.339371	0.117509	-2.88803	0.00387661	0.00658281
Slf1	105377	13	1495.68	-0.451346	0.0815492	-5.53465	3.11844e-08	7.84749e-08
E330034G19Rik	105418	14	34.7407	3.45219	0.497036	6.94555	3.77e-12	1.14351e-11
Slain1	105439	14	348.767	-0.922995	0.100749	-9.1613	5.12744e-20	2.05541e-19
Kctd9	105440	14	1990.81	-0.288867	0.0763722	-3.78236	0.000155351	0.000302371
Dock9	105445	14	335.732	1.10656	0.131723	8.40063	4.4408e-17	1.63385e-16
Abhd4	105501	14	3018.22	1.16177	0.0815058	14.2539	4.24193e-46	3.07013e-45
Fam170b	105511	14	2704.34	2.55397	0.0710404	35.9509	4.8985e-283	3.74025e-281
Chmp7	105513	14	466.432	-0.563181	0.0846737	-6.6512	2.90722e-11	8.50232e-11
A630023A22Rik	105518	14	51.0351	2.08299	0.326394	6.38184	1.74972e-10	4.92837e-10
Ankrd28	105522	14	1592.53	1.45217	0.0684885	21.2032	8.92353e-100	1.29542e-98
Mbnl2	105559	14	219.081	0.543079	0.127705	4.2526	2.11302e-05	4.41529e-05
Zfp957	105590	14	4.31673	2.17727	0.918329	2.3709	0.0177448	0.0276193
Thtpa	105663	14	202.641	-1.83635	0.135225	-13.5799	5.26938e-42	3.52718e-41
Rcbtb2	105670	14	425.954	0.994143	0.109729	9.05995	1.30509e-19	5.18101e-19
Ppif	105675	14	125.94	-1.13231	0.171165	-6.61529	3.70818e-11	1.07982e-10
Mycbp2	105689	14	4543.28	-0.598814	0.0613827	-9.75542	1.74868e-22	7.56701e-22
Ano6	105722	15	146.353	-0.389895	0.140338	-2.77826	0.00546511	0.00911351
Fam83h	105732	15	90.8661	-1.48522	0.187976	-7.90109	2.76465e-15	9.54825e-15
Tigd5	105734	15	80.7205	1.91142	0.227936	8.38581	5.03795e-17	1.85085e-16
Scrib	105782	15	7961.72	-0.74484	0.0411263	-18.1111	2.60714e-73	2.82461e-72
Prkaa1	105787	15	657.824	-0.654113	0.0964132	-6.78447	1.16512e-11	3.4655e-11
Amigo2	105827	15	52.9068	-1.29713	0.237721	-5.45653	4.85538e-08	1.20891e-07
Ccdc65	105833	15	7006.39	0.55601	0.0867225	6.41137	1.44221e-10	4.07526e-10
Sgsm3	105835	15	1775.99	0.232271	0.0680789	3.41178	0.000645391	0.0011931
Mtbp	105837	15	925.05	0.367424	0.0734171	5.00461	5.59761e-07	1.31082e-06
Dennd3	105841	15	92.4689	0.786159	0.249089	3.15613	0.00159876	0.00284092
Lmf2	105847	15	1361.27	-0.742453	0.0777639	-9.54752	1.32833e-21	5.60638e-21
Nckap1l	105855	15	1125.78	2.14395	0.0873565	24.5425	5.19822e-133	1.02214e-131
Csdc2	105859	15	27.649	-1.56701	0.447655	-3.50049	0.000464412	0.000868643
Cmc4	105886298	X	18.887	1.53361	0.429877	3.56756	0.000360324	0.000680448
Ugt3a1	105887	15	7.60597	-2.45596	0.732788	-3.35153	0.000803659	0.00147043
Gm20498	105940408	12	510.684	0.60055	0.123214	4.87405	1.09334e-06	2.50739e-06
Espl1	105988	15	4619.44	-0.482488	0.0803914	-6.00174	1.95213e-09	5.22801e-09
Topors	106021	4	2918.53	-1.87851	0.0654259	-28.7119	2.70628e-181	8.00895e-180
Gga1	106039	15	2390.37	-0.399714	0.0666457	-5.9976	2.00261e-09	5.36075e-09
Prickle1	106042	15	106.486	-1.51676	0.16657	-9.10581	8.56226e-20	3.41368e-19
Fbxo4	106052	15	191.718	-1.73373	0.152699	-11.3539	7.08975e-30	3.71506e-29
AW549877	106064	15	484.75	-0.247976	0.109468	-2.26527	0.023496	0.035971
Slc45a4	106068	15	1202.26	-0.810704	0.0659096	-12.3002	9.03048e-35	5.23774e-34
Mfsd5	106073	15	97.4757	-0.967239	0.176317	-5.48578	4.11639e-08	1.02898e-07
Txndc11	106200	16	380.531	-1.25506	0.110948	-11.3122	1.142e-29	5.9576e-29
Zc3h7a	106205	16	1201.85	-1.52461	0.165055	-9.23699	2.53519e-20	1.02889e-19
Qtrt2	106248	16	121.559	0.359657	0.160862	2.23581	0.0253644	0.038617
Rrn3	106298	16	457.138	-0.602279	0.0938893	-6.41478	1.41025e-10	3.98751e-10
Osbpl11	106326	16	455	-0.815876	0.0897673	-9.08879	1.0015e-19	3.98388e-19
Rfc4	106344	16	792.669	0.37726	0.0830434	4.54293	5.54782e-06	1.21195e-05
Ypel1	106369	16	7709.8	-0.442418	0.0897793	-4.92784	8.31437e-07	1.92301e-06
Eaf2	106389	16	98.433	0.553077	0.193855	2.85304	0.00433031	0.00730051
Srl	106393	16	110.168	-0.515311	0.203883	-2.52749	0.0114882	0.0183856
Sft2d1	106489	17	272.293	-1.57197	0.119068	-13.2022	8.51584e-40	5.48584e-39
Stk38	106504	17	1106.26	-1.1896	0.120275	-9.89066	4.56992e-23	2.00708e-22
Gpsm3	106512	17	26.7906	0.969995	0.320535	3.02617	0.00247671	0.0043081
Pkdcc	106522	17	53.8286	-1.13346	0.253714	-4.46746	7.91536e-06	1.71113e-05
Nrm	106582	17	960.629	2.47596	0.0930796	26.6005	6.70313e-156	1.60857e-154
Scaf8	106583	17	843.114	-0.500949	0.0741258	-6.7581	1.39816e-11	4.14189e-11
Ankrd12	106585	17	1983.79	-0.625642	0.0876453	-7.13834	9.44675e-13	2.93918e-12
Wdr90	106618	17	432.538	1.44547	0.134292	10.7636	5.11172e-27	2.49614e-26
Trip10	106628	17	146.524	1.28859	0.171159	7.5286	5.12861e-14	1.68013e-13
Ift140	106633	17	19949.9	-0.782058	0.0713674	-10.9582	6.07009e-28	3.03556e-27
Vmac	106639	17	76.8886	-0.606333	0.274648	-2.20767	0.0272672	0.0412894
AI413582	106672	17	137.309	-0.630504	0.175165	-3.59948	0.000318857	0.000604861
Rpusd1	106707	17	66.5342	-0.717289	0.217871	-3.29226	0.000993852	0.00180104
Mpig6b	106722	17	26.9235	1.65672	0.380775	4.35091	1.35573e-05	2.881e-05
Catsperd	106757	17	4260.67	-1.41003	0.0704273	-20.021	3.61117e-89	4.72857e-88
Ticam1	106759	17	21.3493	-1.68436	0.438133	-3.84441	0.000120844	0.000237275
Ttbk1	106763	17	4632.57	0.316891	0.0609869	5.19606	2.03561e-07	4.89022e-07
Stap2	106766	17	159.966	0.606411	0.175967	3.44616	0.00056862	0.00105616
Dhx57	106794	17	283.078	-1.76582	0.165419	-10.6748	1.33533e-26	6.44571e-26
Tcf19	106795	17	32.4008	0.802846	0.315452	2.54506	0.0109258	0.0175207
Oard1	106821	17	421.772	-0.485011	0.0867211	-5.59276	2.23482e-08	5.66835e-08
Unc119b	106840	5	383.896	1.23988	0.109427	11.3307	9.24358e-30	4.83363e-29
Abhd3	106861	18	113.689	-1.90982	0.226374	-8.43657	3.26779e-17	1.20884e-16
Tnfaip8	106869	18	27.7235	1.05455	0.380632	2.77052	0.00559676	0.00931808
Afap1l1	106877	18	147.744	0.601125	0.143642	4.18489	2.85306e-05	5.89667e-05
Hmgxb3	106894	18	1185.94	0.171924	0.068357	2.51509	0.0119002	0.0190089
Kctd1	106931	18	58.6303	-1.11209	0.247519	-4.49294	7.0246e-06	1.52417e-05
Slc39a6	106957	18	4079.8	-0.901742	0.0680613	-13.249	4.5741e-40	2.96174e-39
Gramd3	107022	18	225.219	1.25602	0.133923	9.37863	6.68378e-21	2.76539e-20
Me2	107029	18	348.138	-0.309187	0.126354	-2.44699	0.0144055	0.022746
Lars	107045	18	1105.5	-0.879126	0.0876593	-10.0289	1.13781e-23	5.0884e-23
Wdr74	107071	19	327.047	-0.370949	0.113379	-3.27177	0.00106877	0.00193205
Rrp12	107094	19	1468.64	0.687788	0.0860403	7.99378	1.30859e-15	4.58865e-15
Gpr137	107173	19	2776.33	-0.271661	0.0601858	-4.51371	6.37044e-06	1.38804e-05
Btaf1	107182	19	6102.81	-0.743039	0.063449	-11.7108	1.12205e-31	6.12146e-31
Uqcc3	107197	19	316.638	-0.92678	0.11287	-8.21104	2.19275e-16	7.88015e-16
Macrod1	107227	19	175.642	0.669151	0.154522	4.33045	1.48805e-05	3.14778e-05
AI837181	107242	19	839.814	0.597664	0.0710543	8.41136	4.05268e-17	1.49168e-16
Kazald1	107250	19	21.3016	-1.1116	0.363272	-3.05995	0.00221371	0.00387471
Yars	107271	4	130.906	-1.23866	0.322267	-3.84358	0.000121252	0.000237997
Vps37c	107305	19	846.703	-1.20334	0.0879201	-13.6868	1.21791e-42	8.23049e-42
Lpxn	107321	19	922.89	-2.21094	0.0782097	-28.2694	8.2235e-176	2.34702e-174
Trpt1	107328	19	47.8979	-0.494016	0.229925	-2.1486	0.0316662	0.0473972
Gbf1	107338	19	6132.05	-0.188042	0.0583632	-3.22194	0.00127328	0.00228511
Kank1	107351	19	120.923	-1.37507	0.259964	-5.28947	1.22673e-07	2.98484e-07
Pdzd8	107368	19	3051.11	1.64331	0.0522477	31.4524	3.89564e-217	1.56162e-215
Slc25a45	107375	19	64.0706	-1.72573	0.247201	-6.98108	2.92911e-12	8.926e-12
Brms1	107392	19	2627.51	0.821	0.0869143	9.44608	3.51752e-21	1.46464e-20
Hat1	107435	2	1212.14	1.41195	0.0744139	18.9742	2.78624e-80	3.26536e-79
Unc5a	107448	13	36.705	-1.08427	0.308191	-3.51816	0.000434554	0.000814783
Unc5b	107449	10	55.7282	0.875335	0.227805	3.84247	0.000121802	0.000238998
Atf5	107503	7	163.179	0.82431	0.131876	6.25066	4.08711e-10	1.13098e-09
Eprs	107508	1	3181.52	-0.310825	0.0921787	-3.37198	0.000746309	0.0013703
Ssr1	107513	13	3236.1	-0.620759	0.0627923	-9.88592	4.79158e-23	2.10234e-22
Magee1	107528	X	41.8686	0.805759	0.26417	3.05015	0.00228728	0.00399594
Arl2bp	107566	8	5891.19	0.63445	0.0825977	7.68121	1.57591e-14	5.26437e-14
Wwp1	107568	4	1165.73	2.11917	0.081326	26.0578	1.09885e-149	2.48163e-148
Nt5c3	107569	6	151.057	-0.721157	0.135572	-5.31936	1.04133e-07	2.54461e-07
Col16a1	107581	4	3514.75	-0.772571	0.0847176	-9.11937	7.55652e-20	3.01884e-19
Ovol2	107586	2	1601.92	-0.256672	0.087852	-2.92165	0.00348186	0.00595087
Mylk	107589	16	1101.85	-0.82537	0.0879784	-9.3815	6.50382e-21	2.69346e-20
Pi4kb	107650	3	508.242	-1.29044	0.125224	-10.3051	6.68447e-25	3.0856e-24
Uap1	107652	1	345.125	-0.975492	0.104665	-9.32016	1.16165e-20	4.76935e-20
Coro2a	107684	4	2682.14	2.0718	0.0875926	23.6527	1.10704e-123	2.02762e-122
Snrpd2	107686	7	1794.51	0.44432	0.089995	4.93717	7.9264e-07	1.83641e-06
Sf3b4	107701	3	2616.09	0.748611	0.0586748	12.7586	2.79009e-37	1.71171e-36
Rnh1	107702	7	108.099	-0.341495	0.159388	-2.14254	0.03215	0.0480602
Slc12a6	107723	2	1827.36	-1.86641	0.111284	-16.7716	3.93634e-63	3.71478e-62
Mrpl41	107733	2	648.882	-0.451898	0.0883177	-5.11673	3.10883e-07	7.39895e-07
Mrpl30	107734	1	807.076	0.717805	0.0818935	8.76511	1.86598e-18	7.16104e-18
Rapgef1	107746	2	3251.91	-0.552722	0.0757813	-7.29364	3.01685e-13	9.58242e-13
Aldh1l1	107747	6	68.954	-0.872718	0.239973	-3.63674	0.00027611	0.000526547
Scamp1	107767	13	2139.58	1.77357	0.0718794	24.6742	2.02237e-134	4.02602e-133
Scml2	107815	X	1074.72	1.78378	0.108332	16.4659	6.45277e-61	5.8667e-60
Jmjd6	107817	11	1185.7	0.300949	0.0705921	4.26321	2.01509e-05	4.21915e-05
Thoc5	107829	11	2567.04	-0.240749	0.0881092	-2.73239	0.00628766	0.0103967
Usp9y	107868	Y	334.815	2.30171	0.107708	21.37	2.54243e-101	3.74945e-100
Mthfs	107885	9	68.1245	1.64205	0.250503	6.55504	5.56285e-11	1.60585e-10
Mgat5	107895	1	1282.45	-1.8082	0.0640271	-28.2413	1.82262e-175	5.16008e-174
Chd4	107932	6	7929.06	-0.636922	0.0527415	-12.0763	1.40937e-33	7.96743e-33
Celsr3	107934	9	45.7143	0.945229	0.323994	2.91742	0.00352935	0.00602853
Pom121	107939	5	4104.13	-0.59023	0.0658427	-8.96424	3.12416e-19	1.22808e-18
Cdk9	107951	2	1010.13	-1.92547	0.11244	-17.1245	9.75191e-66	9.6469e-65
Frs3	107971	17	686.914	-2.74838	0.115571	-23.781	5.25648e-125	9.72862e-124
Pacs1	107975	19	6365.9	0.557233	0.0560869	9.93517	2.92684e-23	1.29382e-22
Babam2	107976	5	814.825	0.47425	0.129106	3.67334	0.000239399	0.00045907
Ddb2	107986	2	190.458	0.860693	0.15295	5.6273	1.83055e-08	4.66579e-08
Cdc20	107995	4	4015.06	-0.604824	0.0589564	-10.2588	1.08014e-24	4.96134e-24
Cenpf	108000	1	5183.48	0.161893	0.0700729	2.31035	0.0208686	0.0321609
Ap1s2	108012	X	220.518	2.43618	0.147727	16.4911	4.25457e-61	3.89021e-60
Celf4	108013	18	140.612	-0.888332	0.216971	-4.09424	4.23549e-05	8.6315e-05
Srsf9	108014	5	804.667	-0.887611	0.0714642	-12.4204	2.02637e-35	1.18584e-34
Chrnb4	108015	9	22.2346	0.947824	0.362558	2.61426	0.00894198	0.0144975
Lin7a	108030	10	2439.54	0.287217	0.0715017	4.01693	5.89625e-05	0.000118828
Shmt2	108037	10	179.099	-0.471626	0.169675	-2.77958	0.00544288	0.00907731
Chrnb3	108043	8	18.6955	-1.65929	0.418263	-3.96709	7.27548e-05	0.000145708
Camk2d	108058	3	75.353	-1.10555	0.21976	-5.03072	4.88629e-07	1.1479e-06
Cstf2	108062	X	1225.12	2.34787	0.0785209	29.9012	1.89876e-196	6.4035e-195
Grm3	108069	5	12.9369	1.69765	0.492877	3.44437	0.00057239	0.00106305
Grm6	108072	11	13.1211	1.80998	0.479428	3.77529	0.000159825	0.000310735
Grm7	108073	6	140.035	2.0102	0.234855	8.55931	1.13546e-17	4.26112e-17
Ltbp4	108075	7	106.004	0.874006	0.162767	5.36966	7.88853e-08	1.94137e-07
Skiv2l	108077	17	3709.29	-0.657959	0.0404181	-16.2788	1.39494e-59	1.24704e-58
Rnf216	108086	5	3197.91	0.922736	0.0718807	12.8371	1.01673e-37	6.27688e-37
Rnf144a	108089	12	210.922	0.812638	0.155675	5.22011	1.78816e-07	4.31164e-07
Slco1a5	108096	6	16.2352	-1.4439	0.449468	-3.21246	0.00131602	0.00235847
Prkab2	108097	3	527.149	-1.14768	0.128113	-8.95837	3.29519e-19	1.29445e-18
Med21	108098	6	471.879	1.35381	0.0844173	16.0371	7.03231e-58	6.14647e-57
Baiap2	108100	11	3327.54	0.160916	0.0551802	2.91619	0.00354337	0.00605132
Slco3a1	108116	7	1777.11	-0.49019	0.0527046	-9.30071	1.39513e-20	5.71466e-20
U2af1	108121	17	698.531	-1.28204	0.0721814	-17.7614	1.40686e-70	1.47528e-69
Napg	108123	18	335.269	-0.632613	0.114256	-5.53682	3.08006e-08	7.75422e-08
Xrcc4	108138	13	707.128	-0.875462	0.112348	-7.7924	6.57502e-15	2.23492e-14
Taf9	108143	13	19919.7	0.186828	0.0766368	2.43784	0.0147755	0.0233062
Ak6	108143	13	19919.7	0.186828	0.0766368	2.43784	0.0147755	0.0233062
Galnt2	108148	8	149.553	-1.5037	0.162229	-9.26896	1.87965e-20	7.6602e-20
Galnt7	108150	8	455.78	1.93072	0.130396	14.8065	1.32952e-49	1.02896e-48
Adamts7	108153	9	40.7281	1.33827	0.295461	4.52942	5.91471e-06	1.29081e-05
Ogt	108155	X	404.6	0.576909	0.117315	4.91762	8.76043e-07	2.02353e-06
Mthfd1	108156	12	122.803	1.09814	0.160645	6.83581	8.15443e-12	2.44107e-11
Ubxn8	108159	8	862.028	0.67536	0.120188	5.61919	1.91853e-08	4.88158e-08
Fam50a	108160	X	50.3803	0.571801	0.226057	2.52946	0.0114239	0.0182928
Fam50b	108161	13	3635.52	0.19884	0.0843583	2.35709	0.018419	0.028593
Gm45521	108168208	14	81.9865	3.13787	0.246951	12.7065	5.44502e-37	3.31971e-36
Slc35b3	108652	13	222.462	-1.02488	0.138371	-7.40677	1.29413e-13	4.17981e-13
Rimklb	108653	6	3777.89	-0.537017	0.0672482	-7.98559	1.3985e-15	4.89809e-15
Fam210a	108654	18	480.839	2.2709	0.190856	11.8985	1.20475e-32	6.69903e-32
Foxp1	108655	6	961.976	0.423636	0.0648119	6.53639	6.302e-11	1.81447e-10
Rnpepl1	108657	1	380.095	1.49051	0.118948	12.5307	5.07148e-36	3.0179e-35
Rnf187	108660	11	4664.01	-0.718214	0.0780417	-9.20295	3.48271e-20	1.40503e-19
Atp6v1h	108664	1	1485.53	-1.3289	0.0834252	-15.9292	3.97409e-57	3.44617e-56
Epsti1	108670	14	623.667	0.6064	0.102673	5.90614	3.50221e-09	9.25424e-09
Dnajc9	108671	14	923.944	1.55065	0.0762366	20.3399	5.70013e-92	7.65719e-91
Ccdc86	108673	19	807.613	0.244902	0.0983677	2.48966	0.0127867	0.0203328
Cops8	108679	1	1001.6	-1.39147	0.104942	-13.2594	3.98272e-40	2.58357e-39
Gpt2	108682	8	99.8708	-0.937708	0.193632	-4.84274	1.28059e-06	2.92124e-06
Ccdc88a	108686	11	3119.24	0.210013	0.0980323	2.14229	0.0321703	0.0480864
Edem2	108687	2	613.055	-0.857315	0.0800224	-10.7134	8.80274e-27	4.26898e-26
Stn1	108689	19	312.916	-1.46894	0.127743	-11.4992	1.3318e-30	7.09889e-30
Chn1	108699	2	1885.92	1.57622	0.0728917	21.6241	1.06609e-103	1.60715e-102
Pttg1ip	108705	10	1891.73	0.353706	0.0783338	4.51536	6.32079e-06	1.37773e-05
Fam207a	108707	10	272.098	-0.61599	0.125941	-4.8911	1.00275e-06	2.30652e-06
Sft2d2	108735	1	140.858	-0.664449	0.177299	-3.74762	0.000178518	0.000345783
Lyrm2	108755	4	182.228	-0.964246	0.158547	-6.08177	1.18864e-09	3.2185e-09
Galnt16	108760	12	98.4936	0.919397	0.190509	4.826	1.393e-06	3.16906e-06
Pnrc1	108767	4	404.891	-0.616576	0.124745	-4.94267	7.70603e-07	1.787e-06
Mex3b	108797	7	459.587	1.317	0.0949941	13.8641	1.04586e-43	7.25115e-43
Ston2	108800	12	893.277	0.516758	0.096745	5.34144	9.22097e-08	2.2592e-07
Calr4	108802	4	51.3103	-1.13523	0.252921	-4.48849	7.17309e-06	1.55563e-05
Spem2	108803	11	2026.71	1.90903	0.0563903	33.8539	3.18038e-251	1.74753e-249
Jmjd1c	108829	10	2406.27	-0.755877	0.0741632	-10.1921	2.15129e-24	9.80983e-24
Tmem74b	108832	2	9.46466	1.35228	0.558435	2.42155	0.0154546	0.0242906
Ibtk	108837	9	502.014	-0.569226	0.109129	-5.2161	1.82731e-07	4.40422e-07
Ankhd1	108857	18	3051.44	0.279547	0.0699478	3.99651	6.42821e-05	0.000129238
2700081O15Rik	108899	19	63.3865	1.15554	0.217782	5.30594	1.12091e-07	2.73377e-07
Tbcd	108903	11	341.302	-1.35204	0.15642	-8.64367	5.44358e-18	2.06304e-17
Aida	108909	1	623.956	-1.3309	0.127232	-10.4605	1.3119e-25	6.17049e-25
Rcc2	108911	4	1810.57	-0.982903	0.141549	-6.94388	3.81471e-12	1.15688e-11
Cdca2	108912	14	3435.77	1.11747	0.0561468	19.9026	3.86594e-88	4.9881e-87
Lhfp	108927	3	53.5453	-1.22114	0.234325	-5.21132	1.87497e-07	4.51663e-07
Smim13	108934	13	2094.13	-0.871645	0.0742102	-11.7456	7.43652e-32	4.07093e-31
Rnf169	108937	7	185.917	-0.699333	0.138169	-5.06145	4.16089e-07	9.81561e-07
Trmt10a	108943	3	2952.7	-0.238878	0.059585	-4.00903	6.09686e-05	0.000122744
Zzz3	108946	3	1060.73	0.69338	0.0683127	10.1501	3.31031e-24	1.50135e-23
Apol7c	108956	15	20.7384	2.12734	0.389701	5.4589	4.79098e-08	1.19305e-07
Miga2	108958	2	99.9484	-1.24006	0.201974	-6.13973	8.26638e-10	2.25665e-09
E2f8	108961	7	559.574	-0.68295	0.0847625	-8.05722	7.80512e-16	2.75719e-15
4930555G01Rik	108978	14	81.1472	3.38093	0.789513	4.2823	1.84972e-05	3.88629e-05
Tpr	108989	1	3609.21	-1.1002	0.0963562	-11.4181	3.39665e-30	1.79371e-29
Ciapin1	109006	8	4463.58	-0.357985	0.0716649	-4.99527	5.87533e-07	1.37293e-06
Nabp1	109019	1	2080.13	1.84017	0.0506055	36.363	1.63515e-289	1.36686e-287
Pfdn4	109054	2	318.337	-1.0647	0.124668	-8.54022	1.33972e-17	5.0191e-17
Dnaaf2	109065	12	2297	-0.430061	0.0934694	-4.60109	4.20284e-06	9.25582e-06
Ints5	109077	19	141.312	-0.337721	0.140696	-2.40037	0.0163787	0.0256492
Sephs1	109079	2	151.888	-0.44574	0.14317	-3.11336	0.00184968	0.00326605
Fbxw17	109082	13	139.828	-3.33927	0.301287	-11.0833	1.51121e-28	7.67263e-28
Rars2	109093	4	597.84	-1.21811	0.114535	-10.6353	2.04237e-26	9.79428e-26
Rbm15b	109095	9	548.432	-0.319944	0.0861933	-3.71194	0.000205676	0.000396342
Slc30a9	109108	5	1504.84	-0.237022	0.101685	-2.33094	0.0197568	0.0305514
Uhrf2	109113	19	365.562	-0.289411	0.118449	-2.44333	0.0145523	0.0229727
Mmadhc	109129	2	3063.51	1.11459	0.0788023	14.1441	2.03023e-45	1.45684e-44
Plekha5	109135	6	2224.09	-1.19597	0.0584483	-20.462	4.70182e-93	6.37438e-92
Mmaa	109136	8	106.603	-0.777122	0.173419	-4.48117	7.42356e-06	1.60836e-05
Chd9	109151	8	439.433	-1.08652	0.127874	-8.49686	1.94786e-17	7.26043e-17
Ube2q2	109161	9	1836.55	0.45411	0.0602206	7.54077	4.67212e-14	1.53258e-13
Atl3	109168	19	4117.52	2.16794	0.0509336	42.5642	0	0
Igip	109169	18	82.9612	-0.961974	0.200137	-4.80658	1.53537e-06	3.48262e-06
Trip11	109181	12	1454.17	-0.478157	0.0699859	-6.83219	8.36301e-12	2.50266e-11
Sobp	109205	10	103.481	-0.385549	0.175414	-2.19793	0.0279539	0.0422132
Rarres1	109222	3	46.8333	-1.92263	0.273365	-7.0332	2.01853e-12	6.19286e-12
Fam118b	109229	9	3126.89	-0.555302	0.103768	-5.3514	8.72762e-08	2.1413e-07
Sccpdh	109232	1	13016.1	0.294813	0.0694276	4.24634	2.1729e-05	4.53719e-05
Mbd5	109241	2	633.835	0.854761	0.119764	7.13701	9.53796e-13	2.9665e-12
Kif24	109242	4	1133.52	-1.25544	0.0749573	-16.7487	5.78759e-63	5.43854e-62
Adtrp	109254	13	386.814	2.36227	0.121924	19.3748	1.25856e-83	1.53093e-82
Rlf	109263	4	772.669	-0.400515	0.0751704	-5.3281	9.92452e-08	2.42752e-07
Me3	109264	7	248.982	-0.263537	0.114793	-2.29576	0.0216894	0.0333675
Mybpc1	109272	10	30.0733	-1.25416	0.440789	-2.84525	0.00443762	0.00747643
Actr5	109275	2	413.979	-2.33791	0.134928	-17.327	2.94057e-67	2.957e-66
Prex2	109294	1	42.3577	1.15094	0.425456	2.7052	0.00682636	0.0112327
Orai1	109305	5	439.208	0.286203	0.103342	2.76946	0.00561491	0.00934388
Prr9	109314	3	26.178	1.99784	0.402983	4.95763	7.13588e-07	1.65696e-06
C1qtnf7	109323	5	3.43844	2.19515	0.997868	2.19984	0.0278182	0.0420335
Rnf20	109331	4	624.197	-0.761196	0.0854163	-8.9116	5.03011e-19	1.96025e-18
Pkn2	109333	3	2018.34	0.255303	0.0609306	4.19006	2.78881e-05	5.76862e-05
Ankrd39	109346	1	110.3	-1.3053	0.19057	-6.84947	7.41219e-12	2.22227e-11
Abraxas2	109359	7	1087.22	0.775477	0.119243	6.50331	7.85703e-11	2.25154e-10
Tbx10	109575	19	4.19812	2.32492	0.870055	2.67215	0.0075366	0.0123381
Dsp	109620	13	32.1178	-1.65569	0.353844	-4.67916	2.88058e-06	6.4046e-06
Cald1	109624	6	84.5285	0.945318	0.3467	2.72662	0.00639871	0.0105635
Txlna	109658	4	817.128	-0.592925	0.0822627	-7.2077	5.69037e-13	1.78652e-12
Cyb5a	109672	18	343.868	-1.77374	0.120739	-14.6907	7.39767e-49	5.62414e-48
Ank2	109676	3	3300.39	2.21024	0.0841366	26.2696	4.26668e-152	9.88905e-151
Hyal3	109685	9	58.6332	1.0909	0.23768	4.58976	4.43746e-06	9.75181e-06
Arrb1	109689	7	465.856	1.90099	0.20386	9.32497	1.11019e-20	4.56021e-20
Itga1	109700	13	862.087	1.96731	0.116592	16.8734	7.05788e-64	6.73995e-63
Actn1	109711	12	134.366	1.3696	0.172947	7.9192	2.39038e-15	8.28972e-15
Cyb5r3	109754	15	535.347	-0.61682	0.0882654	-6.98824	2.78359e-12	8.49135e-12
Selenos	109815	7	2906.34	-0.728222	0.0487462	-14.939	1.83602e-50	1.438e-49
F11	109821	8	49.7548	2.49146	0.298929	8.33462	7.77492e-17	2.83804e-16
C7	109828	15	768.177	-0.592122	0.0804518	-7.35996	1.83961e-13	5.9059e-13
Braf	109880	6	1657.3	1.15848	0.0726762	15.9403	3.32833e-57	2.88761e-56
Mzf1	109889	7	303.133	0.248093	0.105093	2.3607	0.0182404	0.0283333
Asl	109900	5	97.0782	-0.895547	0.191307	-4.68121	2.85183e-06	6.34308e-06
Mcf2	109904	X	65.1067	-1.85453	0.272329	-6.80991	9.76621e-12	2.91565e-11
Rap1a	109905	3	242.179	0.844775	0.127321	6.63501	3.24486e-11	9.46622e-11
Abr	109934	11	175.425	0.561763	0.129109	4.35109	1.35461e-05	2.87932e-05
Art3	109979	5	9564.49	-1.08679	0.0784056	-13.8612	1.08907e-43	7.54772e-43
Gusb	110006	5	65.822	0.911509	0.209373	4.35353	1.33965e-05	2.84822e-05
Tpgs1	110012	10	4.72795	-1.93854	0.877005	-2.21041	0.0270767	0.0410256
Kif22	110033	7	687.751	0.620668	0.085937	7.22236	5.10915e-13	1.60719e-12
Dek	110052	13	1085.38	1.64017	0.0683777	23.9869	3.80615e-127	7.17231e-126
Dut	110074	2	829.437	-2.07865	0.0869062	-23.9183	1.97645e-126	3.69677e-125
Pygb	110078	2	205.202	-0.55676	0.132277	-4.20906	2.56433e-05	5.32177e-05
Dnah5	110082	15	122.435	1.95236	0.214098	9.11899	7.5828e-20	3.02866e-19
Dnah12	110083	14	6564.75	-1.22229	0.0528989	-23.1063	4.00585e-118	6.92019e-117
Dnah1	110084	14	7551.04	-1.30593	0.0513053	-25.454	6.36894e-143	1.34695e-141
Phka2	110094	X	389.746	2.14386	0.102738	20.8672	1.06482e-96	1.50733e-95
Pygl	110095	12	68.1762	0.934749	0.241158	3.87608	0.000106151	0.00020957
Nop2	110109	6	885.244	0.497146	0.0882388	5.6341	1.7597e-08	4.48844e-08
Mpi	110119	9	5293.87	-0.766761	0.0679782	-11.2795	1.65666e-29	8.61695e-29
Fgb	110135	3	25.1122	2.46255	0.367468	6.70141	2.0642e-11	6.06907e-11
Ehmt2	110147	17	7421.29	0.143571	0.0388526	3.69527	0.000219654	0.000422446
Raf1	110157	6	852.562	-0.845258	0.0914294	-9.24492	2.35425e-20	9.56339e-20
Slc35b1	110172	11	567.905	-0.937449	0.0899161	-10.4258	1.89029e-25	8.83671e-25
Manba	110173	3	131.618	0.494919	0.184965	2.67575	0.00745629	0.0122134
Fdps	110196	3	912.316	0.529972	0.10558	5.01963	5.17702e-07	1.2141e-06
Akr7a5	110198	4	358.853	-0.555777	0.0965745	-5.75491	8.6688e-09	2.24424e-08
Tmbim6	110213	15	5170.06	0.935495	0.0456119	20.5099	1.75673e-93	2.40568e-92
Triobp	110253	15	577.354	-0.340144	0.106768	-3.18583	0.00144339	0.00257469
Msra	110265	14	82.7193	-0.887061	0.216385	-4.09946	4.14114e-05	8.44508e-05
Bcr	110279	10	772.51	0.654721	0.120184	5.44764	5.10435e-08	1.26857e-07
Cox6b1	110323	7	232.918	0.398238	0.117233	3.39698	0.000681344	0.00125615
Tas1r1	110326	4	233.478	2.04148	0.131625	15.5098	2.97596e-54	2.47011e-53
Pp2d1	110332	17	1651.68	2.58371	0.0588056	43.9365	0	0
Dync2h1	110350	9	4290	-0.885762	0.0574221	-15.4255	1.10381e-53	9.05112e-53
Grk2	110355	19	226.215	0.488861	0.133209	3.66987	0.000242676	0.000465101
Sec13	110379	6	1323.07	-0.246822	0.101254	-2.43766	0.0147827	0.0233133
Shroom2	110380	X	89.8999	0.475259	0.186838	2.54369	0.0109688	0.0175848
C8b	110382	4	376.042	-0.462396	0.10792	-4.28462	1.83053e-05	3.84918e-05
Acat1	110446	9	456.687	-0.79092	0.109475	-7.22467	5.02331e-13	1.58103e-12
Dgkq	110524	5	70.017	-0.724454	0.248652	-2.91352	0.00357374	0.00609846
Adarb1	110532	10	521.173	2.37894	0.131082	18.1485	1.31965e-73	1.43591e-72
Amhr2	110542	15	1127.09	-1.75342	0.0790423	-22.1833	4.98279e-109	7.95352e-108
H2-Q7	110558	17	71.4833	-0.736606	0.318245	-2.31459	0.0206354	0.0318153
Timp4	110595	6	20.2175	2.43702	0.449953	5.41618	6.08867e-08	1.50683e-07
Arhgef28	110596	13	41.245	1.47788	0.293965	5.02739	4.97205e-07	1.16774e-06
Atxn3	110616	12	2481.08	1.89888	0.0598783	31.7123	1.05226e-220	4.38766e-219
Grik4	110637	9	40.0397	1.12034	0.34061	3.28923	0.00100461	0.00181923
Rps6ka3	110651	X	210.15	1.08203	0.184517	5.86416	4.51423e-09	1.18503e-08
Aldh7a1	110695	18	363.644	-0.512647	0.117887	-4.34863	1.36994e-05	2.90909e-05
H2-M10.3	110696	17	4.71305	2.27482	0.872317	2.60779	0.00911286	0.0147556
Chaf1b	110749	16	315.651	-0.770626	0.11774	-6.54513	5.9442e-11	1.71313e-10
Cse1l	110750	2	2026.5	0.464187	0.0885639	5.24126	1.59483e-07	3.85653e-07
Nr3c2	110784	8	110.684	2.46602	0.236214	10.4398	1.63193e-25	7.64919e-25
Tshz1	110796	18	86.8188	-1.40212	0.191625	-7.317	2.53574e-13	8.09363e-13
Srsf1	110809	11	3284.82	-1.41734	0.0689479	-20.5567	6.70639e-94	9.25566e-93
Pwp2	110816	10	228.742	-0.588933	0.111051	-5.30328	1.13743e-07	2.77329e-07
Pcca	110821	14	382.88	0.878958	0.115293	7.62368	2.46549e-14	8.17566e-14
Etfb	110826	7	312.452	1.71644	0.112704	15.2297	2.24662e-52	1.81023e-51
Lims1	110829	10	560.404	0.435603	0.118483	3.67651	0.000236443	0.000453746
Chrna5	110835	9	195.093	2.34519	0.139833	16.7713	3.95483e-63	3.73023e-62
Etfa	110842	9	246.17	0.675167	0.104782	6.44357	1.16693e-10	3.31225e-10
Ptpa	110854	2	3933.8	-1.65133	0.0643341	-25.6681	2.65732e-145	5.77214e-144
Kcnq3	110862	15	205.418	0.393672	0.174667	2.25384	0.0242063	0.0369815
Scn2a	110876	2	154.522	2.37195	0.207885	11.4099	3.73245e-30	1.97046e-29
Scn4a	110880	11	23.6622	2.21124	0.393391	5.62096	1.89896e-08	4.83455e-08
Gabra5	110886	7	84.1211	2.82679	0.22113	12.7834	2.03066e-37	1.25015e-36
Slc8a2	110891	7	1720.07	-0.932687	0.0611397	-15.255	1.52489e-52	1.23263e-51
Slc8a3	110893	12	5.96282	-1.63581	0.735542	-2.22395	0.0261516	0.0397503
Slc9a4	110895	1	12.6944	2.06818	0.90502	2.28523	0.0222995	0.0342404
Chrna2	110902	14	8.30825	1.56668	0.586826	2.66975	0.00759067	0.0124243
Cds2	110911	2	363.762	0.265097	0.123951	2.13873	0.0324574	0.0484704
Hspa13	110920	16	1120.3	0.734376	0.0747062	9.83018	8.34656e-23	3.64037e-22
Atp6v1b1	110935	6	285.63	2.44392	0.127437	19.1775	5.70484e-82	6.82183e-81
D1Pas1	110957	1	6196.52	-0.387645	0.0796347	-4.8678	1.1285e-06	2.58533e-06
M1ap	110958	6	997.099	1.9594	0.0679295	28.8446	5.92855e-183	1.77836e-181
Nudt19	110959	7	57.789	0.554536	0.235173	2.358	0.0183739	0.028528
Erc1	111173	6	789.03	0.475547	0.118417	4.01585	5.9231e-05	0.000119342
Zfp607b	112415	7	515.967	1.36752	0.0893231	15.3098	6.57566e-53	5.33248e-52
1700102P08Rik	112418	9	2509.18	-2.49948	0.079383	-31.4863	1.33585e-217	5.41649e-216
Zfp979	112422	4	98.1209	-1.77949	0.228875	-7.77493	7.54878e-15	2.5595e-14
Gm20517	112694759	17	714.399	0.384691	0.11105	3.46413	0.000531958	0.000989942
Aanat	11298	11	4.10997	-4.07345	1.31845	-3.08957	0.00200449	0.0035239
Abca1	11303	4	305.831	-0.346503	0.0954461	-3.63035	0.000283036	0.00053923
Abca2	11305	2	390.678	1.51805	0.139196	10.9058	1.08153e-27	5.37203e-27
Abcb7	11306	X	104.992	1.20306	0.259135	4.64258	3.44079e-06	7.61943e-06
Abl2	11352	1	730.69	-0.571272	0.131455	-4.34577	1.3879e-05	2.94441e-05
Acadl	11363	1	119.941	0.519483	0.174821	2.97151	0.00296336	0.00510877
Acadvl	11370	11	510.642	-1.1509	0.0986397	-11.6677	1.8633e-31	1.0131e-30
V1ra8	113850	6	27.5892	-1.84674	0.467865	-3.94717	7.90795e-05	0.000157837
Vmn1r15	113863	6	22.7482	-0.927585	0.331268	-2.8001	0.00510865	0.00854494
Acaa1a	113868	9	113.772	-1.23173	0.186074	-6.61956	3.60263e-11	1.04995e-10
Acads	11409	5	57.6836	-1.09132	0.240413	-4.53937	5.64218e-06	1.2321e-05
Laptm4b	114128	15	1330.76	-0.724946	0.0737424	-9.83079	8.29682e-23	3.61957e-22
Atp6v0b	114143	4	449.413	0.338822	0.0829583	4.08424	4.42208e-05	8.99864e-05
Slc33a1	11416	3	899.829	0.353513	0.0745552	4.74163	2.12006e-06	4.75624e-06
Ace	11421	11	6249.65	2.01368	0.0419194	48.0369	0	0
Macf1	11426	4	1558.33	-0.251367	0.117953	-2.13108	0.0330826	0.0493497
Aco1	11428	4	107.838	-0.661097	0.192047	-3.44237	0.000576649	0.00107062
Aco2	11429	15	4007.31	-0.637899	0.06889	-9.25967	2.05058e-20	8.34522e-20
Acox1	11430	11	356.592	1.1355	0.109681	10.3528	4.06511e-25	1.88685e-24
Acp1	11431	12	1881.86	0.516499	0.100703	5.12893	2.91401e-07	6.94371e-07
Acp2	11432	2	660.014	-1.28343	0.144276	-8.89561	5.80969e-19	2.26106e-18
Acp5	11433	9	35.2937	1.11902	0.317357	3.52606	0.000421796	0.000791619
Acr	11434	15	4814.33	0.324746	0.0685716	4.73587	2.18115e-06	4.88895e-06
Chrna1	11435	2	36.9621	-1.10485	0.398603	-2.77181	0.00557453	0.00928457
Chrna7	11441	7	41.1114	2.22435	0.286592	7.76137	8.40176e-15	2.84434e-14
Chrne	11448	11	439.436	0.718226	0.0940641	7.63549	2.24958e-14	7.46671e-14
Adipoq	11450	16	125.155	2.47087	0.180345	13.7008	1.00446e-42	6.79841e-42
Acrv1	11451	9	3838.05	2.12428	0.0626654	33.8988	6.94327e-252	3.83904e-250
Crip3	114570	17	39.6312	-2.24823	0.419784	-5.35569	8.52284e-08	2.09222e-07
D17H6S53E	114585	17	53.5078	-1.41165	0.424662	-3.32416	0.000886841	0.00161555
Zmynd10	114602	9	10083.8	-1.76672	0.0631024	-27.9976	1.73696e-172	4.77204e-171
Prdm15	114604	16	184.294	0.721862	0.302022	2.3901	0.0168437	0.0263211
Actb	11461	5	7784.84	0.933238	0.042752	21.8291	1.22784e-105	1.88975e-104
Pth2	114640	7	26.9213	1.72345	0.36802	4.68303	2.82659e-06	6.29089e-06
Rpl31	114641	1	1767.73	-0.337461	0.0754053	-4.47529	7.63078e-06	1.65184e-05
Slc13a3	114644	2	19.2539	-0.880744	0.370671	-2.37608	0.0174977	0.0272516
Actg1	11465	11	22868.1	-0.701313	0.0869683	-8.06402	7.38287e-16	2.6096e-15
Impa2	114663	18	69.5769	2.18521	0.407605	5.36108	8.27257e-08	2.03248e-07
Hsd17b11	114664	5	37.5804	-0.70589	0.271307	-2.60181	0.00927327	0.0150057
4930444G20Rik	114671	10	217.668	2.19446	0.14528	15.1051	1.49981e-51	1.19e-50
Gtf2ird2	114674	5	680.639	-0.951405	0.162321	-5.86124	4.59423e-09	1.20585e-08
Selenom	114679	11	34.4143	1.08398	0.276719	3.91726	8.95605e-05	0.00017783
Actg2	11468	6	2146.98	2.09588	0.0641294	32.682	2.81874e-234	1.31875e-232
Actl7a	11470	4	4139.56	2.26979	0.0682296	33.2669	1.16197e-242	5.99266e-241
Actl7b	11471	4	10689.5	1.85184	0.0545952	33.9194	3.44512e-252	1.91688e-250
Rasa2	114713	9	346.848	0.347644	0.111429	3.11986	0.00180937	0.00319936
Spred1	114715	2	160.675	0.70822	0.148142	4.78067	1.74708e-06	3.94256e-06
Actn2	11472	13	413.789	1.66094	0.115093	14.4312	3.29165e-47	2.4282e-46
Actn3	11474	19	99.4514	-1.36453	0.17673	-7.72096	1.15458e-14	3.88488e-14
Supt16	114741	14	2372.64	-1.09149	0.0716823	-15.2267	2.35117e-52	1.8936e-51
Acta2	11475	19	126.548	0.397199	0.180385	2.20195	0.0276686	0.0418326
Pawr	114774	10	41.7793	0.569702	0.256505	2.22102	0.0263498	0.040017
Acvr1b	11479	15	517.126	-2.60564	0.102175	-25.5017	1.8893e-143	4.02457e-142
Acvr2a	11480	2	785.24	0.63336	0.0780832	8.11134	5.00654e-16	1.78035e-15
Aspa	11484	11	139.098	-1.5867	0.165847	-9.56721	1.09826e-21	4.65092e-21
Ada	11486	2	16.7189	0.989375	0.421964	2.34469	0.0190429	0.0294967
Plpbp	114863	8	755.576	-2.00299	0.135791	-14.7506	3.04909e-49	2.34744e-48
Psg29	114872	7	10.0319	-1.56569	0.524823	-2.98326	0.00285192	0.00492868
Dscaml1	114873	9	92.8526	2.11849	0.211881	9.99852	1.54691e-23	6.89697e-23
Ddhd1	114874	14	9007.96	1.26202	0.066954	18.8491	2.98975e-79	3.47616e-78
Plcz1	114875	6	3994.12	2.33805	0.0786698	29.7198	4.25599e-194	1.40051e-192
Adam11	11488	11	466.587	-1.46623	0.163074	-8.9912	2.44556e-19	9.65199e-19
Dcun1d1	114893	3	5124.09	1.74844	0.0663951	26.3339	7.84362e-153	1.83482e-151
Adam15	11490	3	296.017	1.42783	0.141567	10.0859	6.37919e-24	2.86958e-23
Adam17	11491	12	521.71	-1.01216	0.0888259	-11.3949	4.43585e-30	2.33551e-29
Adam19	11492	11	72.9766	-1.886	0.214541	-8.79088	1.48394e-18	5.71355e-18
Adam2	11495	14	15190.8	-1.03446	0.0709917	-14.5716	4.26026e-48	3.19891e-47
Adam22	11496	5	460.384	1.10998	0.112376	9.87736	5.21899e-23	2.28475e-22
Adam3	11497	8	23202.9	0.534274	0.0670727	7.9656	1.64425e-15	5.74169e-15
Adam4	11498	12	705.738	2.03766	0.0808329	25.2083	3.24946e-140	6.75076e-139
Adam8	11501	7	37.7416	-1.95417	0.301432	-6.48297	8.99342e-11	2.56967e-10
Adam9	11502	8	208.157	-0.555726	0.154741	-3.59133	0.000328999	0.000623431
Adcy6	11512	15	188.939	-1.12914	0.246119	-4.58777	4.48003e-06	9.84045e-06
Adcy7	11513	8	50.9928	0.655242	0.302769	2.16416	0.0304518	0.0456997
Adcy9	11515	16	63.2886	-1.17473	0.229047	-5.12878	2.91628e-07	6.94818e-07
Add1	11518	5	480.672	-0.795928	0.125883	-6.32279	2.56889e-10	7.17614e-10
Add2	11519	6	31.9157	0.911737	0.313603	2.90729	0.00364571	0.00621307
Plin2	11520	4	685.125	2.07674	0.126906	16.3644	3.43393e-60	3.09019e-59
Adh1	11522	3	63.1237	1.56461	0.234616	6.66883	2.57857e-11	7.55872e-11
Adh7	11529	3	121.193	2.1081	0.282597	7.45975	8.66885e-14	2.81794e-13
Adk	11534	14	243.941	-0.345432	0.115377	-2.99394	0.00275398	0.00476784
Adnp	11538	2	561.365	0.526475	0.127504	4.12908	3.6421e-05	7.46622e-05
Adora1	11539	1	386.354	-1.95515	0.107857	-18.1272	1.94356e-73	2.10957e-72
Adora2b	11541	11	9.98697	1.14194	0.526688	2.16816	0.0301464	0.0452619
Adora3	11542	3	95.0651	-0.730114	0.189596	-3.8509	0.000117683	0.000231301
Adprh	11544	16	1188.6	-2.43947	0.10944	-22.2905	4.56714e-110	7.34322e-109
Parp1	11545	1	3149.65	-1.08011	0.079545	-13.5786	5.36461e-42	3.58956e-41
Parp2	11546	14	291.725	-0.696905	0.160864	-4.33227	1.47579e-05	3.12335e-05
Adra1b	11548	11	5.92017	1.69451	0.736467	2.30087	0.021399	0.0329351
Adra2c	11553	5	3.3427	2.26824	1.00938	2.24717	0.0246291	0.0375818
Adrb1	11554	19	55.1263	-1.7662	0.250299	-7.05636	1.70918e-12	5.25291e-12
Adsl	11564	15	721.318	-1.52507	0.115153	-13.2438	4.902e-40	3.1729e-39
Adssl1	11565	12	44.7831	2.13276	0.366999	5.81135	6.19704e-09	1.61524e-08
Avil	11567	10	7.31882	2.19601	0.727558	3.01833	0.00254173	0.00441599
Aebp1	11568	11	38.5631	0.63242	0.272303	2.32249	0.0202067	0.031209
Aebp2	11569	6	692.734	-1.11218	0.0975544	-11.4006	4.15034e-30	2.18714e-29
Crisp1	11571	17	1.66372	3.43754	1.60377	2.14341	0.0320806	0.0479726
Aga	11593	8	113.603	-2.08796	0.17906	-11.6607	2.02355e-31	1.09853e-30
Acan	11595	7	17.6005	1.31039	0.45625	2.87208	0.00407774	0.00690175
Angpt2	11601	8	27.7792	1.65972	0.446226	3.71946	0.000199653	0.000385155
Agrn	11603	4	170.629	1.19984	0.184927	6.4882	8.68708e-11	2.48456e-10
Agt	11606	8	137.804	-2.82241	0.179811	-15.6965	1.59761e-55	1.3554e-54
Agtr1a	11607	13	489.005	0.255846	0.0911815	2.8059	0.00501763	0.00839907
Agtr1b	11608	3	23.7823	-1.69503	0.387365	-4.37581	1.20984e-05	2.58062e-05
Agtr2	11609	X	3.83249	-2.48479	1.02131	-2.43294	0.0149768	0.0235964
Agtrap	11610	4	587.4	0.76254	0.0863652	8.82925	1.05378e-18	4.06975e-18
Nr0b1	11614	X	104.014	-1.27028	0.179438	-7.07919	1.44997e-12	4.47109e-12
Ahr	11622	12	32.0191	1.27543	0.285156	4.47274	7.72222e-06	1.6708e-05
Aif1	11629	17	2903.69	2.11115	0.0566634	37.2578	7.93236e-304	7.52209e-302
Crybg1	11630	10	79.2455	1.35849	0.204071	6.65693	2.79598e-11	8.18513e-11
Aip	11632	19	175.837	-0.320391	0.144749	-2.21343	0.0268683	0.0407308
Ak1	11636	2	2133.68	1.93458	0.0692605	27.9319	1.09412e-171	2.97809e-170
Ak2	11637	4	2450.58	-0.483762	0.0682334	-7.08981	1.34294e-12	4.14831e-12
Ak4	11639	4	200.277	1.38863	0.207722	6.68504	2.30866e-11	6.77991e-11
Akap1	11640	11	6032.26	2.09503	0.055293	37.8896	0	0
Akap3	11642	6	14313.8	2.34451	0.073757	31.7869	9.8125e-222	4.10125e-220
Akap4	11643	X	16971.1	2.35285	0.075597	31.1236	1.15608e-212	4.44246e-211
Alpl	11647	4	125.588	1.14629	0.245463	4.66991	3.01334e-06	6.69387e-06
Akt1	11651	12	504.807	0.636166	0.0850344	7.48128	7.36043e-14	2.40102e-13
Akt2	11652	7	1744.34	-0.859998	0.0792627	-10.85	1.99474e-27	9.84695e-27
Alas1	11655	9	2162.07	-0.875997	0.0609891	-14.3632	8.81114e-47	6.44057e-46
Alas2	11656	X	139.526	-1.25851	0.159265	-7.90198	2.74514e-15	9.48273e-15
Alcam	11658	16	65.1263	1.92501	0.24604	7.82395	5.11895e-15	1.74807e-14
Abcd1	11666	X	432.861	2.62685	0.106275	24.7173	6.96256e-135	1.3892e-133
Aldh1a1	11668	19	537.516	-1.44043	0.122243	-11.7833	4.75859e-32	2.6147e-31
Aldh2	11669	5	390.011	-1.18073	0.0948336	-12.4506	1.38866e-35	8.15621e-35
Aldh3a1	11670	11	5.35152	2.21273	0.836336	2.64574	0.00815128	0.013284
Fgfrl1	116701	5	416.098	-1.05619	0.0886404	-11.9154	9.83485e-33	5.48426e-32
Aldh3a2	11671	11	504.574	-0.319925	0.113409	-2.82099	0.00478753	0.00803143
Pcdha1	116731	18	54.9399	2.00128	0.241798	8.27664	1.26699e-16	4.59251e-16
Tsga13	116732	6	647.334	2.44443	0.0949443	25.746	3.5775e-146	7.87766e-145
Vps4a	116733	8	3614.47	0.233044	0.0899937	2.58956	0.00960994	0.0155092
Aldoa	11674	7	4155.33	0.922299	0.0443482	20.7967	4.63323e-96	6.51682e-95
Lsm10	116748	4	240.952	-0.423807	0.13539	-3.13027	0.00174647	0.00309248
Aldoc	11676	11	53.6748	-0.702071	0.309634	-2.26742	0.0233643	0.0357881
Akr1b3	11677	6	2742.95	-0.865493	0.0875619	-9.88436	4.86699e-23	2.13383e-22
Foxn4	116810	5	13.6248	-1.85858	0.507538	-3.66194	0.00025031	0.000479211
Alk	11682	17	35.0467	-0.886638	0.287806	-3.08068	0.00206527	0.00362533
Rims2	116838	15	762.55	-0.941349	0.086312	-10.9064	1.07476e-27	5.3399e-27
Alox12	11684	11	56.352	-1.17202	0.240447	-4.87436	1.09163e-06	2.5038e-06
Prelp	116847	1	41.3385	-0.770391	0.29813	-2.58408	0.00976384	0.0157475
Alox12b	11686	11	13.6045	0.976032	0.447249	2.1823	0.0290873	0.0437861
Alox15	11687	11	22.4908	1.95571	0.534919	3.65608	0.0002561	0.000489711
Mta1	116870	12	2212.26	-0.254247	0.0678494	-3.74722	0.000178806	0.000346266
Serpinb7	116872	1	3.96741	2.70685	1.15491	2.34377	0.01909	0.0295619
Alox5	11689	6	2.50172	2.51456	1.17275	2.14415	0.0320206	0.0478911
Slc19a2	116914	1	652.725	-0.992762	0.0944167	-10.5147	7.39266e-26	3.49201e-25
Gfer	11692	17	1405.57	1.18098	0.0964222	12.248	1.72088e-34	9.92573e-34
Tgs1	116940	4	129.314	0.712933	0.161077	4.42604	9.59772e-06	2.06143e-05
Fam57a	116972	11	69.3702	0.452557	0.197238	2.29447	0.0217634	0.0334725
Ambp	11699	4	15.3097	2.85831	0.523972	5.45509	4.89485e-08	1.21822e-07
Amd1	11702	10	1386.93	-1.28068	0.0868942	-14.7384	3.65295e-49	2.80744e-48
Amh	11705	10	12.1713	-2.60005	0.570928	-4.55407	5.26171e-06	1.15101e-05
Pip4k2c	117150	10	567.761	-1.05584	0.100932	-10.4608	1.3071e-25	6.15117e-25
Ttyh2	117160	11	205.361	-1.25879	0.13453	-9.35697	8.20569e-21	3.38633e-20
1110038F14Rik	117171	15	237.629	-0.498359	0.113665	-4.38444	1.16284e-05	2.48277e-05
Bloc1s4	117197	5	306.906	-0.918708	0.104812	-8.76525	1.8636e-18	7.15345e-18
Ivns1abp	117198	1	4921.8	-0.26505	0.0567041	-4.67427	2.95005e-06	6.55657e-06
Amy1	11722	3	126.559	-1.83466	0.24706	-7.42595	1.11973e-13	3.62514e-13
Ank	11732	15	90.1147	-1.11293	0.246564	-4.51378	6.36832e-06	1.38792e-05
Ank1	11733	8	36.2032	1.80494	0.333294	5.41548	6.11251e-08	1.51252e-07
Ank3	11735	10	239.42	0.581126	0.129017	4.50426	6.6606e-06	1.44822e-05
Ankfy1	11736	11	588.574	-0.757009	0.0782983	-9.66827	4.11261e-22	1.76064e-21
Slc25a4	11739	8	184.813	-0.879965	0.128231	-6.86233	6.77479e-12	2.03221e-11
Slc25a5	11740	X	206.984	-0.788511	0.140325	-5.6192	1.91847e-08	4.88158e-08
Anxa11	11744	14	322.948	0.626646	0.1035	6.05453	1.40829e-09	3.79983e-09
Anxa3	11745	5	246.942	2.53324	0.129981	19.4892	1.35461e-84	1.66848e-83
Anxa6	11749	11	36.7333	-0.706491	0.258428	-2.73381	0.00626064	0.010355
Anxa7	11750	14	617.406	-1.87846	0.098848	-19.0035	1.59504e-80	1.8743e-79
Prdx3	11757	19	100.078	-0.805202	0.175165	-4.59682	4.28978e-06	9.44019e-06
Asb10	117590	5	3.59476	3.17228	1.12634	2.81644	0.00485598	0.00814161
B3galt6	117592	4	50.0828	-1.00793	0.259764	-3.88016	0.000104386	0.000206339
Helb	117599	10	35.3595	-0.848496	0.289047	-2.93549	0.00333017	0.00570766
Srgap1	117600	10	222.555	1.98042	0.137431	14.4103	4.45633e-47	3.2805e-46
Ap1b1	11764	11	1648.91	-1.24633	0.109256	-11.4074	3.83864e-30	2.0247e-29
Ap1g1	11765	8	2224.73	-0.248949	0.0634979	-3.92059	8.83336e-05	0.000175513
Ap1m1	11767	8	5392.64	-0.4054	0.0674099	-6.01396	1.8105e-09	4.85536e-09
Ap1s1	11769	5	345.797	-1.16301	0.137956	-8.4303	3.44774e-17	1.27327e-16
Ap2a1	11771	7	5643.97	0.997961	0.0451163	22.1197	2.0417e-108	3.22684e-107
Ap2a2	11772	7	1342.86	1.22891	0.0639177	19.2265	2.22073e-82	2.67003e-81
Ap2m1	11773	16	1082.32	-0.602478	0.124055	-4.85653	1.19461e-06	2.73288e-06
Ap3b1	11774	13	5117.94	0.412696	0.0775288	5.32313	1.01996e-07	2.49412e-07
Ap3d1	11776	10	5382.97	0.442027	0.0681346	6.48756	8.72371e-11	2.49463e-10
Ap3s1	11777	18	1494.54	1.35161	0.0766864	17.6251	1.58078e-69	1.63626e-68
Ap3s2	11778	7	399.478	-1.1341	0.162319	-6.98688	2.81067e-12	8.56952e-12
Ap4m1	11781	5	970.68	0.428994	0.0635682	6.74857	1.49313e-11	4.41285e-11
Ap4s1	11782	12	244.356	-0.654591	0.153611	-4.26137	2.0318e-05	4.25313e-05
Apba2	11784	7	26.2943	-1.21438	0.492285	-2.46682	0.0136317	0.0216084
Apbb2	11787	5	74.3243	-0.617028	0.280433	-2.20027	0.0277879	0.0419985
Speg	11790	1	28.7684	2.92228	0.461675	6.32974	2.4557e-10	6.87081e-10
Birc3	11796	9	47.0714	-0.830716	0.342063	-2.42855	0.0151593	0.0238647
Birc2	11797	9	2421.61	-0.54701	0.0556997	-9.82071	9.16977e-23	3.99448e-22
Birc5	11799	11	1292.91	-0.272211	0.0767942	-3.54468	0.000393091	0.000739793
Api5	11800	2	2409	-2.20568	0.0752802	-29.2996	1.04849e-188	3.27896e-187
Cd5l	11801	3	23.4367	2.09817	0.450341	4.65907	3.17636e-06	7.05155e-06
Aplp1	11803	7	216.873	-0.303121	0.127393	-2.37942	0.0173401	0.0270277
Aplp2	11804	9	6933.71	-2.42344	0.0501364	-48.337	0	0
Apoa2	11807	1	20.7918	-1.25086	0.390539	-3.2029	0.0013605	0.00243496
Apobec1	11810	6	7.65425	-1.72063	0.698378	-2.46376	0.013749	0.0217845
Apoc1	11812	7	15.2036	-1.2289	0.44313	-2.77322	0.00555047	0.00924973
Apoc2	11813	7	180.997	-1.20447	0.13377	-9.00402	2.17592e-19	8.5955e-19
Apod	11815	16	5.21268	2.21956	0.857791	2.58753	0.00966671	0.0155994
Apoe	11816	7	197.078	1.30012	0.15112	8.60321	7.7518e-18	2.92588e-17
Apoh	11818	11	531.385	2.50027	0.1017	24.5848	1.83854e-133	3.63137e-132
App	11820	16	1331.09	1.70345	0.0767785	22.1866	4.62478e-109	7.38875e-108
Aqp3	11828	4	27.2187	-2.9054	0.413841	-7.02057	2.20969e-12	6.76877e-12
Aqp7	11832	4	2186.31	2.16162	0.0690842	31.2897	6.44549e-215	2.52634e-213
Aqp8	11833	7	214.468	-1.91612	0.135877	-14.1019	3.69912e-45	2.6351e-44
Aqr	11834	2	1217.69	-0.455679	0.076929	-5.92338	3.15399e-09	8.36164e-09
Araf	11836	X	210.288	0.757037	0.1288	5.87763	4.16171e-09	1.0946e-08
Arc	11838	15	6478.23	0.559263	0.0660308	8.46973	2.45955e-17	9.13489e-17
Arf1	11840	11	4020.3	-0.339016	0.0786916	-4.30816	1.64616e-05	3.47141e-05
Arf2	11841	11	361.69	0.224099	0.100849	2.22212	0.0262754	0.0399281
Arf4	11843	14	2333.6	1.22067	0.0562626	21.6959	2.24051e-104	3.40673e-103
Arf5	11844	6	511.175	-0.754753	0.0888715	-8.49264	2.02002e-17	7.52305e-17
Gjc3	118446	5	30.9692	-1.14501	0.470773	-2.4322	0.0150074	0.0236382
Arf6	11845	12	946.701	-0.637088	0.0660386	-9.64721	5.05094e-22	2.15502e-21
Mmp28	118453	11	16.9578	1.87726	0.47656	3.93918	8.17609e-05	0.000163004
Gjc2	118454	11	41.5961	-1.03816	0.283277	-3.66481	0.000247518	0.000474071
Arg2	11847	12	39.9913	1.6743	0.3022	5.54035	3.0186e-08	7.60602e-08
Rhoa	11848	9	1327.11	-0.295905	0.0961845	-3.07643	0.00209495	0.00367595
Rhob	11852	12	478.746	-0.976792	0.0843801	-11.5761	5.44641e-31	2.92521e-30
Rhod	11854	19	29.0598	2.0849	0.328844	6.3401	2.2961e-10	6.43449e-10
Arhgap5	11855	12	6423.69	-0.361798	0.0747253	-4.8417	1.28733e-06	2.93624e-06
Rnd2	11858	11	141.193	-0.378174	0.147626	-2.5617	0.0104162	0.0167552
Arl4a	11861	12	9757.12	0.617126	0.0687842	8.97191	2.91416e-19	1.14707e-18
Arnt	11863	3	509.342	0.271465	0.0992874	2.73413	0.00625456	0.0103459
Arntl	11865	7	90.5434	0.763623	0.174853	4.36724	1.25827e-05	2.67971e-05
Arpc1b	11867	5	237.245	-0.368126	0.107131	-3.43622	0.000589885	0.00109416
Artn	11876	4	108.774	0.965042	0.172086	5.60791	2.04782e-08	5.20079e-08
Arvcf	11877	16	139.949	0.93456	0.276689	3.37765	0.000731079	0.0013439
Arsb	11881	13	157.55	-0.353064	0.14522	-2.43123	0.0150476	0.0236972
Arsa	11883	15	6737.2	-0.364161	0.0492952	-7.38735	1.49783e-13	4.82622e-13
Asah1	11886	8	130.794	-0.542469	0.162055	-3.34744	0.000815624	0.00149124
Rab27a	11891	9	394.351	-1.94447	0.116268	-16.724	8.76063e-63	8.21478e-62
Ass1	11898	2	77.1539	-1.06072	0.193879	-5.47104	4.47407e-08	1.11602e-07
Astn1	11899	1	13.0533	1.52906	0.701129	2.18085	0.0291944	0.0439383
Zfhx3	11906	8	819.319	-2.03185	0.113982	-17.826	4.44179e-71	4.68286e-70
Ate1	11907	7	1644.43	0.458043	0.0645025	7.10116	1.23711e-12	3.82474e-12
Atf1	11908	15	2338.09	0.406948	0.0611332	6.65674	2.79961e-11	8.19442e-11
Atf2	11909	2	2882.95	0.915258	0.0534619	17.1198	1.05637e-65	1.04383e-64
Atf3	11910	1	100.461	-0.934202	0.163767	-5.70445	1.1672e-08	3.0019e-08
Atf4	11911	15	600.385	-1.4747	0.087085	-16.934	2.52684e-64	2.43278e-63
Atm	11920	9	406.168	0.626934	0.162365	3.86125	0.000112806	0.000222236
Atox1	11927	11	355.389	-0.473761	0.121896	-3.88661	0.000101654	0.000201074
Atp1a1	11928	3	746.148	-1.42351	0.0728102	-19.551	4.04837e-85	5.02145e-84
Atp1b1	11931	1	276.903	-1.31593	0.138212	-9.5211	1.71355e-21	7.19608e-21
Atp1b2	11932	11	260.93	-0.826732	0.148308	-5.57443	2.48335e-08	6.28246e-08
Atp1b3	11933	9	4585.19	1.30671	0.0649608	20.1154	5.41552e-90	7.18188e-89
Fxyd2	11936	9	49.1476	0.749344	0.249065	3.00862	0.00262435	0.00455594
Atp2a1	11937	7	13.0081	-1.71326	0.656405	-2.61007	0.00905246	0.0146672
Atp2a2	11938	5	5406.31	-1.15492	0.060321	-19.1462	1.04095e-81	1.24308e-80
Atp2b2	11941	6	27.6385	1.85396	0.359647	5.15493	2.53725e-07	6.06478e-07
Atp5a1	11946	18	5210.81	-0.925575	0.0886984	-10.4351	1.71468e-25	8.03281e-25
Atp5pb	11950	3	2133.88	-0.250646	0.0975264	-2.57003	0.0101689	0.0163738
Atp5g1	11951	11	613.34	0.311454	0.104385	2.98372	0.0028477	0.00492235
Atp5k	11958	5	681.948	-0.603086	0.101706	-5.92973	3.0344e-09	8.05065e-09
Atp6v1a	11964	16	2814.99	-0.232287	0.0696143	-3.33678	0.000847559	0.00154786
Atp6v1b2	11966	8	962.622	-0.228009	0.0669663	-3.40483	0.000662056	0.00122199
Atp6v0d1	11972	8	567.095	-0.385219	0.0900586	-4.27743	1.89065e-05	3.96992e-05
Atp6v1e1	11973	6	531.636	-1.50617	0.140867	-10.6921	1.10817e-26	5.36091e-26
Atp6v0e	11974	17	365.728	-0.828127	0.102118	-8.10951	5.08234e-16	1.80621e-15
Atp6v0a1	11975	11	368.532	-0.663021	0.127987	-5.18037	2.2145e-07	5.30769e-07
Atp7a	11977	X	119.803	-0.457005	0.152534	-2.99609	0.00273464	0.0047376
Atp7b	11979	8	298.948	-1.33531	0.103841	-12.8592	7.63688e-38	4.72297e-37
Atp8a1	11980	5	119.228	0.897601	0.265607	3.37944	0.000726344	0.00133604
Atp10a	11982	7	2122.15	2.69439	0.0595669	45.2329	0	0
Atpif1	11983	4	2421.63	0.319277	0.0666919	4.78734	1.69005e-06	3.81776e-06
Atp6v0c	11984	17	1487.17	-0.746417	0.0699522	-10.6704	1.40033e-26	6.74837e-26
Slc7a1	11987	5	526.408	-2.03301	0.0883676	-23.0062	4.03851e-117	6.8889e-116
Slc7a3	11989	X	16.3502	2.04066	0.634231	3.21753	0.001293	0.00231908
Hnrnpd	11991	5	1615.48	-0.269847	0.0606587	-4.44861	8.6427e-06	1.86311e-05
Auh	11992	13	92.5197	-0.442619	0.202309	-2.18783	0.0286817	0.0432087
Aup1	11993	6	1560.12	-0.412452	0.0792084	-5.20718	1.91731e-07	4.61547e-07
Pcdh15	11994	10	95.9605	1.52183	0.19199	7.92664	2.25147e-15	7.82335e-15
Axin1	12005	17	1064.36	-0.75144	0.099644	-7.54125	4.65489e-14	1.52721e-13
Cep131	12009	11	1660.95	-0.530056	0.085278	-6.21563	5.11195e-10	1.4097e-09
Bach2	12014	4	184.552	1.70448	0.308681	5.52183	3.35496e-08	8.42827e-08
Bad	12015	19	859.957	-0.779815	0.10242	-7.61389	2.65977e-14	8.81162e-14
Bag1	12017	4	3440.05	0.368151	0.0758721	4.85226	1.22062e-06	2.78986e-06
Bak1	12018	17	341.861	-1.38827	0.108777	-12.7626	2.65177e-37	1.62798e-36
Bard1	12021	1	446.179	-1.57376	0.0930994	-16.904	4.20203e-64	4.02582e-63
Bcap29	12033	12	7274.27	-0.349104	0.0880639	-3.96421	7.364e-05	0.000147397
Phb2	12034	6	949.331	-0.541449	0.0934738	-5.79252	6.93376e-09	1.80353e-08
Bcat1	12035	6	18.4566	1.40046	0.460699	3.03985	0.00236692	0.0041265
Bcat2	12036	7	261.754	-1.65744	0.126237	-13.1296	2.22838e-39	1.41995e-38
Bche	12038	3	8.13064	-1.36972	0.627913	-2.18138	0.0291553	0.0438847
Bckdha	12039	7	1049.48	-0.533725	0.0776653	-6.87212	6.32553e-12	1.90197e-11
Bcl2l1	12048	2	2858.07	-0.310818	0.0836179	-3.71713	0.000201499	0.000388462
Bcl2l2	12050	14	138.47	-1.48739	0.176009	-8.45064	2.89702e-17	1.07348e-16
Bcl6	12053	16	56.1258	1.43727	0.232307	6.18695	6.13387e-10	1.68439e-09
Bcl7b	12054	5	946.342	-1.75429	0.0882331	-19.8824	5.77756e-88	7.44373e-87
Bcl7c	12055	7	1362.53	1.27864	0.07142	17.9032	1.11431e-71	1.18399e-70
Bdkrb1	12061	12	8.44819	-1.33487	0.559906	-2.38409	0.0171215	0.02672
Bdkrb2	12062	12	50.1128	-1.76879	0.281274	-6.28848	3.20583e-10	8.91867e-10
Bet1	12068	6	492.96	1.28849	0.107103	12.0304	2.46107e-33	1.38685e-32
Bex2	12069	X	31.7615	0.698408	0.283568	2.46293	0.0137808	0.0218309
Bfsp1	12075	2	119.633	0.446537	0.148462	3.00776	0.00263182	0.00456755
Glb1	12091	9	153.269	-0.872688	0.157249	-5.54971	2.86147e-08	7.21937e-08
Mrps6	121022	16	309.54	-0.223933	0.103377	-2.16617	0.0302984	0.0454811
Bgn	12111	X	54.4868	1.06306	0.257954	4.12112	3.77037e-05	7.71931e-05
Bhmt	12116	13	84.974	-2.4493	0.219792	-11.1437	7.68398e-29	3.92716e-28
Bicd1	12121	6	36.501	1.24001	0.331052	3.74566	0.00017992	0.000348346
Bcl2l11	12125	2	327.621	1.77254	0.118377	14.9737	1.09011e-50	8.55307e-50
Blm	12144	7	1178.03	-0.181932	0.0800745	-2.27204	0.0230844	0.0353746
Cxcr5	12145	9	33.7583	1.88166	0.302109	6.22841	4.71179e-10	1.30057e-09
Bmi1	12151	2	1883.11	1.39333	0.0769097	18.1164	2.36391e-73	2.56267e-72
Bmp1	12153	14	44.2827	1.11891	0.367642	3.04347	0.00233868	0.00407968
Bmp5	12160	9	60.6706	3.65959	0.323359	11.3174	1.07603e-29	5.62174e-29
Bmp6	12161	13	52.2572	1.74341	0.385218	4.52577	6.01751e-06	1.3126e-05
Bmp7	12162	2	55.8379	1.11429	0.236798	4.70568	2.53022e-06	5.64982e-06
Bmp8a	12163	4	10.2423	1.69262	0.585759	2.88962	0.00385714	0.00655542
Bnc1	12173	7	80.4565	0.762748	0.192323	3.96597	7.30993e-05	0.000146348
Bnip2	12175	9	810.643	-0.659562	0.0862635	-7.6459	2.07481e-14	6.89572e-14
Bnip3l	12177	14	951.532	-0.262211	0.0960472	-2.73003	0.00633294	0.0104647
Smyd1	12180	6	343.997	-1.67318	0.133833	-12.502	7.28173e-36	4.30991e-35
Bop1	12181	15	882.397	-0.31419	0.0882276	-3.56113	0.000369257	0.00069687
Bpgm	12183	6	2041.78	0.983808	0.0827898	11.8832	1.44732e-32	8.03265e-32
Brca1	12189	11	570.678	1.33201	0.0971666	13.7086	9.02191e-43	6.11797e-42
Brca2	12190	5	2170.58	-0.518714	0.117095	-4.42984	9.43036e-06	2.02672e-05
Zfp36l1	12192	12	538.186	1.95536	0.109494	17.8582	2.49622e-71	2.64117e-70
Bsg	12215	10	10454.8	-0.272646	0.0691732	-3.9415	8.09751e-05	0.000161474
Bsn	12217	9	227.293	0.374878	0.140464	2.66886	0.0076109	0.0124539
Klf5	12224	14	444.637	1.99563	0.09588	20.8138	3.24249e-96	4.56798e-95
Btg1	12226	10	3930.88	1.02863	0.0440732	23.3391	1.7784e-120	3.15568e-119
Btg2	12227	1	247.271	-0.497378	0.109101	-4.55888	5.14263e-06	1.12538e-05
Btg3	12228	16	319.735	0.392268	0.12995	3.01862	0.00253932	0.00441266
Btk	12229	X	5.01894	2.45428	0.85896	2.85727	0.00427299	0.00720801
Bub1	12235	2	3207.53	0.887967	0.0950165	9.34539	9.15485e-21	3.77098e-20
Bub1b	12236	2	2644.26	-1.05546	0.0932684	-11.3163	1.08943e-29	5.6884e-29
Bub3	12237	7	1331.44	-1.19658	0.121473	-9.85063	6.81174e-23	2.97685e-22
Commd3	12238	2	801.907	1.24544	0.0797381	15.6192	5.38907e-55	4.5263e-54
Serping1	12258	2	64.4169	1.01865	0.217629	4.68069	2.85914e-06	6.35853e-06
C1qa	12259	4	14.8804	1.63001	0.453086	3.59757	0.000321204	0.000608986
C1qb	12260	4	23.7835	1.47838	0.343663	4.30182	1.69398e-05	3.568e-05
C1qbp	12261	11	353.348	0.62739	0.103235	6.0773	1.22226e-09	3.30546e-09
C1qc	12262	4	12.3023	2.18133	0.570988	3.82027	0.000133305	0.000260728
C3	12266	17	41.5192	0.811104	0.302369	2.6825	0.00730746	0.011987
C4b	12268	17	640.639	-1.05274	0.148617	-7.08359	1.40466e-12	4.33364e-12
C6	12274	15	50.6237	2.72014	0.389291	6.98742	2.79991e-12	8.53964e-12
Hyou1	12282	9	10512.9	-2.58914	0.0457894	-56.5445	0	0
Cab39	12283	1	2320.53	-0.439577	0.076041	-5.78079	7.43492e-09	1.9299e-08
Cacna1a	12286	8	493.671	1.70498	0.13544	12.5885	2.44353e-36	1.46247e-35
Cacna1b	12287	2	74.5419	1.00246	0.343767	2.9161	0.00354434	0.00605239
Cacna1g	12291	11	58.2856	1.11931	0.456384	2.45257	0.0141839	0.0224312
Cacna1s	12292	1	178.558	0.869183	0.139616	6.22552	4.79969e-10	1.32442e-09
Cacna2d1	12293	5	210.958	2.04968	0.153412	13.3607	1.02622e-40	6.73633e-40
Cacna2d3	12294	14	43.4854	1.24989	0.292891	4.26741	1.97753e-05	4.14494e-05
Cacnb1	12295	11	503.348	1.3097	0.079629	16.4475	8.74053e-61	7.93441e-60
Cacnb2	12296	2	14.277	2.15692	0.528338	4.08247	4.45605e-05	9.0663e-05
Cacnb3	12297	15	36.3714	0.818062	0.285324	2.86714	0.00414201	0.00700382
Cacnb4	12298	2	102.349	-4.36742	0.275079	-15.877	9.14461e-57	7.8641e-56
Cacybp	12301	1	1563	1.22158	0.0705894	17.3054	4.28043e-67	4.29699e-66
Ddr1	12305	17	144.288	-1.6776	0.158951	-10.5542	4.85649e-26	2.30886e-25
Anxa2	12306	9	597.759	-0.449933	0.0972003	-4.62893	3.67568e-06	8.12427e-06
Calm1	12313	12	19556.3	-0.603566	0.100908	-5.98133	2.21318e-09	5.91547e-09
Calm2	12314	17	13211.7	-2.46869	0.0849409	-29.0637	1.03431e-185	3.15624e-184
Aspm	12316	1	781.818	-0.465146	0.136529	-3.40695	0.000656936	0.00121267
Calr	12317	8	12344.8	-0.391442	0.0761913	-5.13762	2.78233e-07	6.63263e-07
Camk2b	12323	11	43.4115	0.803345	0.258504	3.10768	0.00188564	0.00332523
Camk2g	12325	14	597.443	-1.85297	0.121544	-15.2452	1.77136e-52	1.43055e-51
Camk4	12326	18	922.303	2.28846	0.0726213	31.5122	5.91369e-218	2.40336e-216
Caml	12328	13	693.658	-0.266544	0.112835	-2.36224	0.0181648	0.0282257
Canx	12330	11	6676.7	-1.09543	0.0693221	-15.802	3.01174e-56	2.58245e-55
Cap1	12331	4	3869.93	-1.30828	0.0773867	-16.9057	4.08114e-64	3.91212e-63
Capn1	12333	19	30.605	1.14321	0.327655	3.48907	0.0004847	0.000905629
Capn5	12337	7	25.4548	0.694371	0.322356	2.15405	0.0312361	0.046801
Capn6	12338	X	89.5718	-1.51893	0.210566	-7.21352	5.45235e-13	1.71332e-12
Capn7	12339	14	353.878	0.492721	0.123732	3.98216	6.82925e-05	0.000137067
Capza1	12340	3	4931.04	-0.718132	0.101062	-7.10586	1.19571e-12	3.7026e-12
Capza2	12343	6	778.779	-0.250388	0.0782595	-3.19946	0.00137685	0.00246248
Capza3	12344	6	2367.99	2.30917	0.0584096	39.5342	0	0
Capzb	12345	4	3459.2	0.542594	0.0696263	7.79295	6.54614e-15	2.22596e-14
Car1	12346	3	7.34237	-2.18866	0.678798	-3.22431	0.00126277	0.00226763
Car2	12349	3	728.857	2.18003	0.116018	18.7904	9.05229e-79	1.04424e-77
Car7	12354	8	18.3719	-1.01335	0.422362	-2.39924	0.016429	0.0257211
Casp1	12362	9	6.56014	1.86591	0.660054	2.82691	0.00469995	0.00789353
Casp3	12367	8	25.3284	1.00723	0.376373	2.67615	0.00744723	0.0121997
Casp7	12369	19	65.6066	0.777289	0.218511	3.55722	0.000374806	0.000706813
Casp8	12370	1	21.4622	-0.924219	0.3799	-2.4328	0.0149827	0.0236014
Casp9	12371	4	223.677	-0.992526	0.138999	-7.14051	9.29843e-13	2.89558e-12
Casq1	12372	1	68.1399	1.93302	0.300611	6.43029	1.27362e-10	3.60812e-10
Casr	12374	16	37.7482	0.650954	0.273615	2.37909	0.0173556	0.0270469
Cast	12380	13	5269.15	2.43127	0.0512742	47.4171	0	0
Ctnna1	12385	18	608.199	0.274608	0.0793816	3.45934	0.000541502	0.00100728
Ctnna2	12386	6	283.299	0.536385	0.135792	3.95005	7.81337e-05	0.00015609
Ctnnb1	12387	9	1705.84	-0.451515	0.0819643	-5.50868	3.6154e-08	9.05929e-08
Ctnnd1	12388	2	1689.03	-0.929225	0.0600066	-15.4854	4.35488e-54	3.59941e-53
Runx2	12393	17	169.452	1.93579	0.148484	13.037	7.54056e-39	4.76192e-38
Runx1	12394	16	37.1365	1.13151	0.329536	3.43364	0.000595535	0.00110441
Runx1t1	12395	4	276.13	0.656325	0.176196	3.72497	0.000195342	0.000377169
Cbfa2t2	12396	2	495.864	-0.852146	0.130765	-6.5166	7.19167e-11	2.0649e-10
Runx3	12399	4	106.082	-0.740102	0.229657	-3.22264	0.00127016	0.00227998
Cbfb	12400	8	658.786	-0.324791	0.0797975	-4.07019	4.69747e-05	9.5421e-05
Cbl	12402	9	4218.8	0.209172	0.08789	2.37993	0.0173159	0.026997
Cbln1	12404	8	48.205	0.997887	0.254552	3.92016	8.84889e-05	0.000175802
Serpinh1	12406	7	54.2452	0.674594	0.237554	2.83975	0.00451488	0.00760151
Cbr2	12409	11	14.1635	1.6748	0.644476	2.59871	0.0093576	0.0151324
Cbx1	12412	11	981.079	-1.49694	0.074935	-19.9765	8.81975e-89	1.14891e-87
Cbx2	12416	11	190.113	0.725449	0.130575	5.55579	2.76361e-08	6.97847e-08
Cbx3	12417	6	1456.59	0.538903	0.0628588	8.57324	1.00616e-17	3.78717e-17
Cbx4	12418	11	188.443	-0.510813	0.126395	-4.04139	5.31345e-05	0.000107476
Cbx5	12419	15	1930.7	-0.622286	0.085852	-7.24835	4.21879e-13	1.33282e-12
Rb1cc1	12421	1	14261.2	-0.212421	0.0655632	-3.23994	0.00119555	0.00215197
Ccna1	12427	3	3554.9	0.124586	0.0557051	2.23653	0.0253168	0.0385511
Ccna2	12428	3	303.631	0.821361	0.122727	6.6926	2.19238e-11	6.44057e-11
Ccnb2	12442	9	3764.08	0.727248	0.0656954	11.07	1.75386e-28	8.89181e-28
Ccnd1	12443	7	210.097	1.62768	0.136706	11.9064	1.09566e-32	6.10012e-32
Ccnd2	12444	6	179.491	-0.394083	0.1728	-2.28057	0.0225741	0.0346378
Ccnd3	12445	17	1665.8	2.32602	0.0650313	35.7677	3.51472e-280	2.58303e-278
Ccne2	12448	4	909.36	-1.76726	0.170163	-10.3857	2.88008e-25	1.34176e-24
Ccnf	12449	17	447.311	0.580307	0.105077	5.5227	3.33827e-08	8.39231e-08
Ccng2	12452	5	147.344	1.47359	0.150397	9.79796	1.1488e-22	4.98952e-22
Ccnk	12454	12	11529.2	0.277002	0.0561632	4.9321	8.13518e-07	1.8833e-06
Ccnt1	12455	15	748.05	0.90739	0.129075	7.02992	2.06658e-12	6.33589e-12
Ccr6	12458	17	33.3501	1.49422	0.318199	4.69586	2.65488e-06	5.91472e-06
Ccs	12460	19	758.129	0.738353	0.088234	8.36813	5.85398e-17	2.14707e-16
Cct2	12461	10	7348.59	0.591527	0.0881539	6.71016	1.94413e-11	5.72271e-11
Cct3	12462	3	8776.06	-0.223289	0.0933532	-2.39188	0.0167625	0.0262014
Cct6a	12466	5	3946.05	0.143538	0.0540456	2.65586	0.00791053	0.0129167
Cct8	12469	16	5215.54	-0.540093	0.0818141	-6.60147	4.07094e-11	1.18272e-10
Cd151	12476	7	597.566	-1.4042	0.0930844	-15.0852	2.02676e-51	1.60377e-50
Cd19	12478	7	41.5282	-3.48348	0.390889	-8.91169	5.02592e-19	1.95906e-18
Cd1d1	12479	3	5.72002	-1.80414	0.759391	-2.37577	0.0175124	0.0272721
Cd2	12481	3	38.4623	2.40414	0.340103	7.06887	1.56205e-12	4.80912e-12
Ms4a1	12482	19	36.7264	-0.838762	0.35724	-2.3479	0.0188798	0.0292646
Cd24a	12484	10	247.019	1.83883	0.131172	14.0185	1.20143e-44	8.47635e-44
Cd33	12489	7	25.941	1.5711	0.490985	3.19989	0.00137481	0.00245957
Cd36	12491	5	17.8443	-0.899267	0.382017	-2.35399	0.0185729	0.0288168
Scarb2	12492	5	90.917	-1.61306	0.192999	-8.35784	6.38753e-17	2.3379e-16
Cd37	12493	7	81.4171	1.58217	0.215793	7.33187	2.26971e-13	7.25501e-13
Entpd1	12495	19	1361.68	-0.281242	0.0884517	-3.17962	0.0014747	0.00262894
Entpd2	12496	2	25.9628	1.20567	0.320579	3.7609	0.000169305	0.000328696
Entpd6	12497	2	3709.41	-1.76486	0.0572299	-30.8381	8.08834e-209	3.03537e-207
Entpd5	12499	12	821.349	1.04822	0.0887374	11.8126	3.3588e-32	1.85133e-31
Cd3d	12500	9	72.5635	1.38433	0.197337	7.01503	2.29896e-12	7.03733e-12
Cd3e	12501	9	11.6157	2.03988	0.66074	3.08727	0.00202004	0.00354947
Cd247	12503	1	125.682	2.06604	0.183093	11.2841	1.57255e-29	8.18431e-29
Cd59a	12509	2	107.101	1.49273	0.194879	7.65981	1.86208e-14	6.19921e-14
Cd63	12512	10	704.165	-0.777975	0.0717603	-10.8413	2.19323e-27	1.08147e-26
Cd7	12516	11	10.8203	1.3431	0.489352	2.74464	0.00605769	0.0100381
Cd81	12520	7	315.249	-0.506719	0.0958978	-5.28395	1.2643e-07	3.07412e-07
Cd82	12521	2	181.191	0.917983	0.13186	6.96181	3.35921e-12	1.02067e-11
Cd86	12524	16	9.01977	2.13276	0.671079	3.17811	0.00148239	0.00264105
Cd9	12527	6	278.55	0.502089	0.15063	3.33326	0.000858335	0.00156689
Cdc25a	12530	9	2087.6	1.27646	0.0746245	17.1051	1.3594e-65	1.33876e-64
Cdc25b	12531	2	47.1064	1.34598	0.293472	4.58638	4.50988e-06	9.90478e-06
Cdc25c	12532	18	509.205	1.71074	0.0932832	18.3392	4.02482e-75	4.44798e-74
Cdk1	12534	10	966.208	-1.08587	0.0783171	-13.865	1.03191e-43	7.16004e-43
Cdk11b	12537	4	2073.53	-0.50662	0.0785608	-6.44876	1.12772e-10	3.20664e-10
Cdc42	12540	4	883.423	-0.217933	0.0712251	-3.05979	0.00221496	0.00387622
Cdc45	12544	16	650.201	-0.558051	0.103679	-5.38249	7.34641e-08	1.81073e-07
Cdc7	12545	5	514.681	-1.49383	0.138953	-10.7506	5.88848e-27	2.86909e-26
Arhgap31	12549	16	191.731	-0.519659	0.137122	-3.78977	0.000150787	0.000293778
Cdh11	12552	8	117.262	2.56038	0.181932	14.0732	5.54827e-45	3.93646e-44
Cdh13	12554	8	137.081	0.665191	0.173873	3.82573	0.000130383	0.000255126
Cdh16	12556	8	20.5125	0.882746	0.394653	2.23676	0.0253017	0.0385315
Cdh2	12558	18	1715.07	-1.1271	0.0921497	-12.2311	2.11936e-34	1.22001e-33
Cdh3	12560	8	131.3	-1.28535	0.157086	-8.18246	2.78099e-16	9.96569e-16
Cdh9	12565	15	17.4403	2.27389	0.466273	4.87674	1.07851e-06	2.47467e-06
Cdk2	12566	10	1699.77	-2.39783	0.0749398	-31.9967	1.21104e-224	5.23539e-223
Cdk4	12567	10	342.641	-0.677375	0.123495	-5.48504	4.13386e-08	1.0332e-07
Cdk6	12571	5	395.946	-0.97464	0.129951	-7.50008	6.37802e-14	2.08557e-13
Cdk7	12572	13	420.272	-0.384936	0.0921979	-4.17511	2.97845e-05	6.14576e-05
Cdkn1b	12576	6	106.382	-0.828612	0.16765	-4.94252	7.71209e-07	1.78817e-06
Cdkn1c	12577	7	139.095	1.55102	0.169188	9.16743	4.84412e-20	1.94271e-19
Cdkn2c	12580	4	3659.85	-0.940084	0.0601774	-15.6219	5.16585e-55	4.34503e-54
Cdkn2d	12581	9	1227.81	-1.51009	0.0790884	-19.0937	2.84949e-81	3.38218e-80
Cdo1	12583	18	49.1238	-0.594433	0.251126	-2.36707	0.0179294	0.0278894
Cdr2	12585	7	1285.04	-0.235244	0.0904492	-2.60084	0.00929957	0.0150427
Ift81	12589	5	3631.29	0.896415	0.123602	7.25242	4.09384e-13	1.29473e-12
Cdyl	12593	13	3476.44	1.98876	0.0567011	35.0745	1.65048e-269	1.07819e-267
Cebpa	12606	7	32.7591	1.54607	0.425175	3.63631	0.000276575	0.00052732
Cebpz	12607	17	1328.17	-1.01019	0.0931216	-10.8481	2.03548e-27	1.00453e-26
Cebpg	12611	7	1604.93	0.435969	0.0734594	5.93483	2.94144e-09	7.81343e-09
Cenpa	12615	5	107.284	0.802263	0.208555	3.84677	0.000119683	0.000235049
Cenpb	12616	2	144.361	-0.720731	0.147568	-4.88407	1.03919e-06	2.38756e-06
Cenpc1	12617	5	1328.25	-1.4255	0.092109	-15.4762	5.02257e-54	4.14544e-53
Cetn3	12626	13	2679.14	0.146277	0.0671124	2.17958	0.0292883	0.0440654
Cfh	12628	1	33.4781	1.5978	0.319301	5.00407	5.61316e-07	1.31411e-06
Cfi	12630	3	7.63017	-1.34023	0.627906	-2.13444	0.0328069	0.048955
Cftr	12638	6	807.294	0.313798	0.117065	2.68055	0.00735004	0.0120506
Chd1	12648	17	1394.18	-0.861983	0.0741962	-11.6176	3.35382e-31	1.80957e-30
Chek1	12649	9	286.155	1.57927	0.129607	12.1851	3.73262e-34	2.13753e-33
Chkb	12651	15	575.043	-0.461339	0.125188	-3.68518	0.000228541	0.00043906
Chga	12652	12	109.213	1.22897	0.181336	6.77731	1.2243e-11	3.63906e-11
Chgb	12653	2	138.76	0.317906	0.143557	2.21449	0.0267948	0.0406403
Chil3	12655	3	16.0834	2.37704	0.660014	3.6015	0.000316387	0.000600564
Ovgp1	12659	3	456.533	0.582446	0.155324	3.74989	0.000176913	0.0003429
Chka	12660	19	2881.43	-0.803031	0.0579864	-13.8486	1.29685e-43	8.97367e-43
Chl1	12661	6	8964.23	2.31767	0.0700121	33.1039	2.61361e-240	1.30963e-238
Chm	12662	X	80.1932	1.77986	0.224508	7.92783	2.23011e-15	7.75527e-15
Chml	12663	1	6.09938	6.15131	1.46551	4.19739	2.70006e-05	5.59226e-05
Chrd	12667	16	1.7297	-3.19565	1.49778	-2.1336	0.0328758	0.0490454
Cidea	12683	18	34.5334	-1.48644	0.313318	-4.74418	2.09348e-06	4.7008e-06
Patj	12695	4	381.789	1.85026	0.126918	14.5785	3.85083e-48	2.89642e-47
Cirbp	12696	10	1628.83	-0.881546	0.0638029	-13.8167	2.02087e-43	1.39072e-42
Socs3	12702	11	130.352	-0.396866	0.161814	-2.45261	0.0141822	0.0224306
Socs1	12703	16	66.8022	-1.04788	0.222212	-4.71566	2.40923e-06	5.38854e-06
Cit	12704	5	3212.26	-0.81375	0.074522	-10.9196	9.29105e-28	4.62403e-27
Clca3a1	12722	3	125.047	1.09916	0.153345	7.16787	7.61751e-13	2.38054e-12
Clcn2	12724	16	438.142	-2.19724	0.157625	-13.9397	3.63584e-44	2.54177e-43
Clcn3	12725	8	1189.67	0.687661	0.0582238	11.8106	3.43928e-32	1.8951e-31
Clcn4	12727	7	813.464	-0.812021	0.1112	-7.30235	2.82789e-13	8.99844e-13
Clns1a	12729	7	779.959	-0.275109	0.0934715	-2.94324	0.00324796	0.00557218
Cldn2	12738	X	2.03524	4.57698	1.49993	3.05146	0.00227734	0.0039798
Cldn3	12739	5	49.41	-0.627184	0.235177	-2.66686	0.00765634	0.012524
Clgn	12745	8	24925.5	-0.649275	0.0629423	-10.3154	6.00263e-25	2.77376e-24
Clk1	12747	1	812.205	-0.827753	0.119406	-6.93224	4.14237e-12	1.2543e-11
Clk2	12748	3	1209.82	-0.609918	0.0803484	-7.59091	3.17671e-14	1.04986e-13
Clk4	12750	11	951.952	0.311337	0.114397	2.72155	0.00649758	0.0107177
Clock	12753	5	796.868	-0.820784	0.0797264	-10.295	7.42131e-25	3.42304e-24
Clta	12757	4	257.404	-0.581073	0.128955	-4.50602	6.6054e-06	1.4364e-05
Clu	12759	14	4233.8	-1.94334	0.065597	-29.6254	7.04128e-193	2.28298e-191
Cmah	12763	13	273.348	-0.594552	0.269264	-2.20806	0.0272398	0.0412514
Cmas	12764	6	356.447	-0.596792	0.102799	-5.80542	6.42052e-09	1.6725e-08
Cxcr2	12765	1	203.352	0.498929	0.160531	3.10799	0.00188366	0.00332239
Cxcr4	12767	1	42.964	-1.71529	0.285238	-6.01355	1.81503e-09	4.86676e-09
Ccr7	12775	11	9.56387	1.27642	0.568719	2.24438	0.0248082	0.037842
Ackr3	12778	1	33.7943	-1.14754	0.279274	-4.10903	3.97332e-05	8.11598e-05
Cnbp	12785	6	2530.5	-0.497116	0.0798468	-6.22588	4.78874e-10	1.32161e-09
Cnga3	12790	1	12.6717	1.00855	0.455138	2.21593	0.0266964	0.040505
Cnih1	12793	14	126.489	0.643484	0.154742	4.15843	3.2044e-05	6.59577e-05
Cnih2	12794	19	172.131	1.53741	0.152464	10.0837	6.51962e-24	2.932e-23
Cnn2	12798	10	22.6503	1.39192	0.357182	3.89693	9.74179e-05	0.000192954
Cnp	12799	11	71.2808	-1.00306	0.202021	-4.96514	6.86522e-07	1.59642e-06
Cnr2	12802	4	38.6641	-1.97283	0.289496	-6.81469	9.44667e-12	2.82264e-11
Cntf	12803	19	11.6056	-1.33915	0.546261	-2.45149	0.0142265	0.0224946
Cntfr	12804	4	513.746	-0.224587	0.0785402	-2.85952	0.0042428	0.00716119
Cntn1	12805	15	141.202	0.512145	0.165059	3.10281	0.00191696	0.00337876
Hps3	12807	3	78.1946	-0.477778	0.199326	-2.39697	0.0165315	0.0258632
Coil	12812	11	4881.36	0.190737	0.0844541	2.25847	0.0239166	0.0365736
Col11a1	12814	3	5.86215	2.27433	0.952506	2.38773	0.0169527	0.0264752
Col11a2	12815	17	99.5277	-1.07001	0.269714	-3.96722	7.27171e-05	0.000145649
Col12a1	12816	9	274.79	2.28073	0.144354	15.7996	3.13291e-56	2.68504e-55
Col14a1	12818	15	393.009	1.25865	0.114708	10.9727	5.17002e-28	2.59133e-27
Col15a1	12819	4	201.082	1.75554	0.188863	9.29532	1.46761e-20	6.00458e-20
Col17a1	12821	19	70.2442	-0.600345	0.231052	-2.59832	0.00936818	0.0151468
Col18a1	12822	10	156.971	-1.54303	0.148688	-10.3776	3.1344e-25	1.45792e-24
Col19a1	12823	1	96.6784	1.34136	0.172293	7.78535	6.95227e-15	2.36043e-14
Col2a1	12824	15	1108.33	0.662792	0.0589941	11.2349	2.7487e-29	1.42133e-28
Col3a1	12825	1	388.834	-1.97425	0.14839	-13.3045	2.17962e-40	1.41965e-39
Col4a4	12829	1	419.375	1.09819	0.0961684	11.4194	3.34355e-30	1.76673e-29
Col4a5	12830	X	27.8524	0.793943	0.335251	2.3682	0.0178747	0.0278143
Col5a1	12831	2	469.757	1.39839	0.133919	10.442	1.59373e-25	7.47213e-25
Col5a2	12832	1	10.9165	-1.87169	0.564901	-3.3133	0.000922013	0.00167568
Col6a1	12833	10	26.1667	1.19929	0.320925	3.73696	0.000186259	0.000360342
Col6a2	12834	10	43.799	1.77158	0.262634	6.74541	1.52598e-11	4.50917e-11
Col6a3	12835	1	40.9195	1.7893	0.461981	3.8731	0.000107461	0.00021206
Col7a1	12836	9	82.711	-2.04623	0.610651	-3.3509	0.000805507	0.00147351
Col9a1	12839	1	109.876	-0.37649	0.156943	-2.39889	0.0164448	0.0257414
Col9a3	12841	2	91.5029	1.24165	0.284576	4.36318	1.28188e-05	2.72932e-05
Col1a2	12843	6	62.7211	1.36548	0.237587	5.74728	9.06904e-09	2.34658e-08
Comp	12845	8	6204.4	0.210408	0.0435948	4.82644	1.38993e-06	3.16248e-06
Comt	12846	16	2993.33	0.495198	0.0982269	5.04137	4.62209e-07	1.08714e-06
Copa	12847	1	2990.06	-0.834028	0.0832657	-10.0165	1.29045e-23	5.76372e-23
Cops2	12848	2	2636.89	0.424402	0.100932	4.20485	2.6126e-05	5.41748e-05
Coq7	12850	7	153.397	0.326698	0.151922	2.15044	0.0315207	0.0471995
Cox17	12856	16	430.352	-0.586838	0.0877938	-6.68427	2.32081e-11	6.81445e-11
Cox4i1	12857	8	4974.13	-0.780854	0.0716874	-10.8925	1.25172e-27	6.20685e-27
Cox5a	12858	9	2637.63	0.15549	0.0660814	2.35301	0.0186223	0.0288882
Cox6a1	12861	5	1485.33	-0.270861	0.0643007	-4.21241	2.52657e-05	5.24587e-05
Cox6c	12864	15	2825.59	-0.488427	0.0653761	-7.47104	7.95643e-14	2.59113e-13
Cpa3	12873	3	12.6111	1.65814	0.486306	3.40967	0.000650422	0.00120152
Cpd	12874	11	1368.44	0.325625	0.0656548	4.95965	7.06211e-07	1.64026e-06
Cpe	12876	8	410.521	-1.37019	0.118443	-11.5683	5.96621e-31	3.20244e-30
Cpeb1	12877	7	212.174	1.08528	0.149315	7.26842	3.63722e-13	1.15301e-12
Cplx1	12889	5	64.1612	0.793926	0.201323	3.94355	8.02835e-05	0.000160186
Cpox	12892	16	422.838	0.635975	0.123733	5.13991	2.74875e-07	6.55434e-07
Cpt1a	12894	19	286.682	-0.812908	0.118414	-6.86495	6.65135e-12	1.9962e-11
Cpt1b	12895	15	7224.47	-0.340947	0.0544	-6.26741	3.67108e-10	1.01889e-09
Cpt2	12896	4	1633.17	-0.383667	0.0891125	-4.30543	1.66662e-05	3.51247e-05
Cr2	12902	1	26.0886	1.34138	0.465967	2.8787	0.00399313	0.00676374
Crabp1	12903	9	133.252	0.935334	0.150538	6.21327	5.18933e-10	1.4306e-09
Cradd	12905	10	59.0474	-0.573477	0.237532	-2.41432	0.0157646	0.0247558
Crat	12908	2	31947.3	-0.323867	0.0573459	-5.64761	1.62697e-08	4.16013e-08
Crcp	12909	5	1333.23	-0.621943	0.115112	-5.40296	6.55512e-08	1.62e-07
Creb3	12913	4	387.129	-0.486652	0.15518	-3.13604	0.00171245	0.00303621
Crebbp	12914	16	1511.61	0.769866	0.117316	6.56233	5.2973e-11	1.53045e-10
Atf6b	12915	17	625.961	-1.12517	0.101156	-11.1231	9.68117e-29	4.93516e-28
Crem	12916	18	4668.27	1.01326	0.0918345	11.0336	2.63137e-28	1.32872e-27
Crhr1	12921	11	22.8675	-2.47723	0.40329	-6.14255	8.12081e-10	2.2176e-09
Crip1	12925	12	33.1653	1.22074	0.290266	4.2056	2.60385e-05	5.39998e-05
Bcar1	12927	8	550.049	-0.444991	0.0952643	-4.67113	2.99553e-06	6.65515e-06
Crk	12928	11	739.258	0.554751	0.0934241	5.93799	2.88546e-09	7.6682e-09
Crkl	12929	16	500.389	-0.352424	0.135096	-2.60869	0.00908892	0.0147209
Crlf1	12931	8	500.861	0.595657	0.0896563	6.64379	3.05715e-11	8.92897e-11
Crmp1	12933	5	86.4502	1.7823	0.201407	8.84927	8.80974e-19	3.40759e-18
Pcdha11	12942	18	82.9039	6.05884	0.865154	7.00319	2.50198e-12	7.64816e-12
Hapln1	12950	13	127.475	-1.38219	0.159531	-8.66409	4.55128e-18	1.7297e-17
Cry1	12952	10	1307.86	-1.8413	0.0885752	-20.7879	5.56527e-96	7.82153e-95
Cry2	12953	2	633.174	-1.23926	0.0893003	-13.8774	8.68283e-44	6.03181e-43
Cryba2	12958	1	15.0103	1.9096	0.464228	4.11349	3.89723e-05	7.96424e-05
Cryz	12972	3	117.729	-1.76388	0.169244	-10.4221	1.96571e-25	9.18686e-25
Cs	12974	10	1203.37	-0.380602	0.0703582	-5.40948	6.32064e-08	1.56255e-07
Csf1r	12978	18	30.8381	0.839471	0.318963	2.63188	0.00849145	0.0137988
Csf2ra	12982	19	192.538	-1.4105	0.249457	-5.6543	1.56482e-08	4.00469e-08
Csf2rb2	12984	15	42.1155	0.607933	0.284805	2.13456	0.032797	0.0489444
Csf3	12985	11	4.86395	-3.00628	1.01157	-2.9719	0.00295967	0.00510291
Csk	12988	9	230.491	1.36238	0.174299	7.81632	5.43904e-15	1.85594e-14
Csn1s2b	12992	5	2.76483	2.75173	1.20801	2.2779	0.0227327	0.034863
Csnk2a2	13000	8	3145.3	-0.21047	0.0874278	-2.40735	0.0160686	0.0252084
Csnk2b	13001	17	12000	0.369223	0.0757604	4.87357	1.09601e-06	2.51318e-06
Dnajc5	13002	2	628.62	-0.597226	0.116029	-5.14724	2.64354e-07	6.31114e-07
Ncan	13004	8	244.837	1.85211	0.162442	11.4017	4.10225e-30	2.16245e-29
Smc3	13006	19	2125.58	1.73994	0.0839638	20.7225	2.17334e-95	3.03752e-94
Cst3	13010	2	590.757	-0.658453	0.0832404	-7.91025	2.56863e-15	8.89039e-15
Cst8	13012	2	1245.55	1.93101	0.0794316	24.3104	1.52319e-130	2.93617e-129
Cst9	13013	2	348.622	-2.0904	0.11514	-18.1553	1.16672e-73	1.27028e-72
Ctbp2	13017	7	727.772	-0.441549	0.105071	-4.20239	2.64109e-05	5.47397e-05
Ctcf	13018	8	742.778	-0.177913	0.0766592	-2.32083	0.020296	0.0313441
Ctf1	13019	7	24.3158	-1.37756	0.367496	-3.7485	0.000177897	0.000344657
Pcyt1a	13026	16	1511.78	0.516199	0.0692663	7.45239	9.16616e-14	2.97575e-13
Ctsc	13032	7	21.6403	1.13653	0.383398	2.96435	0.00303325	0.0052221
Ctsd	13033	7	630.159	0.277783	0.0858333	3.23631	0.00121085	0.0021784
Ctsl	13039	13	2129.12	-1.47498	0.0577145	-25.5564	4.6592e-144	1.00218e-142
Ctss	13040	3	9.86876	1.32079	0.570193	2.31638	0.0205374	0.0316835
Cttn	13043	7	579.373	-0.757	0.109994	-6.88222	5.89265e-12	1.77393e-11
Celf1	13046	2	1089.5	-0.57131	0.081689	-6.99372	2.67698e-12	8.1732e-12
Cux1	13047	5	4203.27	0.826824	0.0553537	14.9371	1.88966e-50	1.47935e-49
Cux2	13048	5	75.5945	0.761306	0.273813	2.78038	0.0054295	0.00905584
Cx3cr1	13051	9	136.394	-0.476922	0.154102	-3.09485	0.00196914	0.00346623
Cxadr	13052	16	60.0849	1.08445	0.270448	4.00984	6.07595e-05	0.000122351
Cyba	13057	8	51.7412	-0.516026	0.231919	-2.22502	0.0260798	0.039648
Cybb	13058	X	4.69049	2.00457	0.923144	2.17146	0.0298965	0.0449237
Cyct	13067	2	1714.56	-0.926558	0.0831464	-11.1437	7.686e-29	3.92716e-28
Cyp11a1	13070	9	80.1019	-2.86482	0.263561	-10.8697	1.60794e-27	7.95314e-27
Cyp17a1	13074	19	187.804	-3.37139	0.182382	-18.4853	2.71101e-76	3.0476e-75
Cyp19a1	13075	9	48.6482	-1.49177	0.266654	-5.59442	2.21357e-08	5.61526e-08
Cyp1b1	13078	17	114.874	1.60229	0.164914	9.71591	2.57942e-22	1.11047e-21
Cyp24a1	13081	2	10.5098	1.14731	0.513515	2.23423	0.025468	0.038768
Cyp26a1	13082	19	12.1717	-2.02666	0.539411	-3.75718	0.000171842	0.000333327
Cyp2a12	13085	7	64.7518	2.18663	0.22768	9.60393	7.69567e-22	3.26839e-21
Cyp2b19	13090	7	27.6849	1.79307	0.506121	3.54277	0.000395946	0.000744928
Cyp2c29	13095	19	72.3466	2.18006	0.217494	10.0236	1.20094e-23	5.36667e-23
Cyp2c40	13099	19	2.15604	3.87534	1.69351	2.28835	0.0221171	0.033975
Cyp2f2	13107	7	189.341	1.84214	0.145629	12.6495	1.12532e-36	6.80674e-36
Cyp4b1	13120	4	6.58641	1.81932	0.686909	2.64856	0.00808357	0.0131821
Cyp51	13121	5	1290.11	1.87763	0.11203	16.7601	4.78159e-63	4.50281e-62
Dab2	13132	15	20.5942	1.42864	0.488123	2.92681	0.00342458	0.00586177
Dad1	13135	14	1851.97	0.452632	0.0621548	7.28234	3.28075e-13	1.04075e-12
Cd55	13136	1	736.198	0.293864	0.0960695	3.05887	0.00222177	0.00388766
Cd55b	13137	1	4489.56	0.324016	0.0695555	4.65838	3.18704e-06	7.0726e-06
Dag1	13138	9	1015.18	-1.00774	0.0789896	-12.7579	2.81724e-37	1.72776e-36
Dgka	13139	10	3133.27	0.713849	0.0561088	12.7226	4.4297e-37	2.70724e-36
Dazl	13164	17	2801.47	0.747572	0.0516811	14.4651	2.01273e-47	1.49225e-46
Dbh	13166	2	2.61393	3.35401	1.3094	2.56149	0.0104225	0.0167622
Dbil5	13168	11	6570.16	1.54575	0.0605548	25.5264	1.00351e-143	2.14805e-142
Dbnl	13169	11	671.371	-1.07218	0.107231	-9.99875	1.54337e-23	6.88292e-23
Dbp	13170	7	56.5275	-0.745721	0.220459	-3.38259	0.000718055	0.0013212
Dclk1	13175	3	66.9	1.44519	0.269113	5.37021	7.8645e-08	1.93573e-07
Dck	13178	5	129.024	1.04072	0.146876	7.08573	1.38316e-12	4.26955e-12
Dcn	13179	10	127.043	2.16531	0.180178	12.0176	2.8708e-33	1.61619e-32
Dcpp1	13184	17	14.6694	-1.85887	0.515681	-3.60469	0.000312522	0.000593419
Vps26c	13185	16	351.234	-0.785696	0.147435	-5.32909	9.87037e-08	2.41461e-07
Dct	13190	14	100.908	2.82046	0.278727	10.1191	4.54627e-24	2.05292e-23
Dctn1	13191	6	2435.31	-0.590367	0.0803548	-7.347	2.0271e-13	6.49365e-13
Ddb1	13194	19	7922.25	-0.894062	0.0884665	-10.1062	5.18407e-24	2.33674e-23
Asap1	13196	15	4931.73	1.26811	0.0731566	17.3342	2.59535e-67	2.61134e-66
Ddost	13200	4	2667.37	-0.729371	0.0677163	-10.771	4.7191e-27	2.30505e-26
Ddt	13202	10	3374.07	-1.08686	0.0651065	-16.6936	1.45798e-62	1.36207e-61
Ddx3x	13205	X	482.519	-0.497945	0.107191	-4.64538	3.39448e-06	7.52063e-06
Ddx5	13207	11	32511.4	0.290993	0.0604396	4.81461	1.47486e-06	3.34969e-06
Ddx6	13209	9	2501.19	-1.17042	0.059151	-19.7869	3.85741e-87	4.92308e-86
Dhx9	13211	1	2821.3	-1.56403	0.0554436	-28.2094	4.48015e-175	1.2603e-173
Defa29	13218	8	43.67	2.1314	0.298841	7.13222	9.87612e-13	3.07006e-12
Defa3	13237	8	11.8026	1.46779	0.527237	2.78392	0.00537055	0.00896429
Degs1	13244	1	189.119	-0.76504	0.130695	-5.85361	4.81016e-09	1.26065e-08
Slc29a2	13340	19	19.2678	1.35567	0.399206	3.39592	0.000683991	0.00126063
Dffa	13347	4	214.435	-1.61372	0.177711	-9.08058	1.08001e-19	4.29231e-19
Dgat1	13350	15	2421.85	-1.30932	0.0513428	-25.5016	1.89252e-143	4.02657e-142
Dgcr6	13353	16	2255.93	0.266542	0.0786484	3.38903	0.000701414	0.0012922
Dgcr2	13356	16	2049.5	1.5714	0.0679789	23.1161	3.19169e-118	5.52453e-117
Slc25a1	13358	16	433.302	-0.97016	0.127886	-7.58613	3.2959e-14	1.08904e-13
Dhfr	13361	13	90.42	0.783472	0.191829	4.08423	4.42228e-05	8.99864e-05
Dhh	13363	15	102.373	-1.48995	0.178089	-8.36633	5.94406e-17	2.1792e-16
Diaph1	13367	18	996.939	-0.893081	0.0872943	-10.2307	1.44473e-24	6.61358e-24
Dffb	13368	4	84.3963	-1.02036	0.238878	-4.27145	1.94202e-05	4.07245e-05
Dio2	13371	12	79.5871	-0.920264	0.179631	-5.12309	3.00572e-07	7.15645e-07
Dld	13382	12	2455.47	-0.331293	0.0850363	-3.8959	9.78339e-05	0.000193735
Dlg1	13383	16	878.86	0.39406	0.137994	2.85564	0.00429501	0.00724239
Mpp3	13384	11	59.6274	-0.817072	0.330873	-2.46945	0.0135322	0.0214584
Dll3	13389	7	352.867	0.570417	0.120397	4.73779	2.16061e-06	4.84537e-06
Dlx4	13394	11	74.7898	0.660394	0.209384	3.15398	0.00161058	0.00286163
Dlx5	13395	6	51.374	2.73222	0.326957	8.35652	6.45941e-17	2.36371e-16
Dlx6	13396	6	220.998	2.36362	0.139116	16.9903	9.69065e-65	9.37595e-64
Dmpk	13400	7	282.693	-1.71521	0.213256	-8.04297	8.7687e-16	3.09325e-15
Dmwd	13401	7	854.893	0.526406	0.0888073	5.92751	3.07564e-09	8.15639e-09
Dmc1	13404	15	219.911	1.91099	0.1369	13.959	2.7742e-44	1.94326e-43
Dnah8	13417	17	89492.2	-1.37453	0.0499731	-27.5054	1.51291e-166	3.99471e-165
Dnajc1	13418	2	412.741	-0.686673	0.1084	-6.33462	2.37928e-10	6.66123e-10
Dnase1l3	13421	14	46.1112	1.16404	0.241829	4.81351	1.48304e-06	3.36739e-06
Dnase2a	13423	8	29.3123	-0.824949	0.362315	-2.27688	0.0227933	0.0349529
Dync1h1	13424	12	20121.4	-0.18817	0.0818687	-2.29844	0.0215367	0.0331355
Dync1i1	13426	6	78.1602	-0.611537	0.220904	-2.76833	0.00563438	0.00937451
Dync1i2	13427	2	5253.82	-0.410565	0.0681143	-6.0276	1.66415e-09	4.47034e-09
Dnm1	13429	2	481.202	-1.20858	0.163936	-7.37222	1.67808e-13	5.39715e-13
Dnm2	13430	9	6227.61	-0.376552	0.0556883	-6.76178	1.36308e-11	4.04e-11
Dnmt1	13433	9	2392.62	-1.82749	0.0674605	-27.0897	1.30057e-161	3.24922e-160
Dnmt3a	13435	12	333.864	1.06937	0.132362	8.07912	6.52343e-16	2.30813e-15
Dnpep	13437	1	2562.4	-0.595556	0.0983145	-6.05766	1.38116e-09	3.72833e-09
Cdk2ap1	13445	5	366.491	0.95971	0.103018	9.31593	1.20883e-20	4.95963e-20
Dok1	13448	6	14.7398	1.42963	0.471065	3.03489	0.00240624	0.00419049
Reep5	13476	18	119.482	-0.911942	0.160007	-5.69939	1.20236e-08	3.09098e-08
Dpep1	13479	8	15.4497	1.47587	0.463048	3.1873	0.00143609	0.00256244
Dpm1	13480	2	1712.54	-0.41018	0.063611	-6.44826	1.13145e-10	3.21672e-10
Dpm2	13481	2	430.108	-1.03787	0.10109	-10.2668	9.94818e-25	4.57777e-24
Dpp4	13482	2	11.4774	1.63077	0.649866	2.50939	0.012094	0.0192937
Dpp6	13483	5	119.854	2.13139	0.201008	10.6035	2.87124e-26	1.37281e-25
Dr1	13486	5	4098.57	-1.53499	0.0649555	-23.6314	1.83517e-123	3.3508e-122
Drd2	13489	9	27.3938	1.96401	0.361704	5.42988	5.63915e-08	1.39853e-07
Drg2	13495	11	682.304	-1.08245	0.102657	-10.5444	5.39049e-26	2.5586e-25
Arid3a	13496	10	791.706	2.29239	0.0876855	26.1434	1.17239e-150	2.67165e-149
Drp2	13497	X	42.1518	-1.36992	0.331908	-4.12742	3.66852e-05	7.51688e-05
Dsc3	13507	18	3.25056	-2.92939	1.21691	-2.40723	0.0160739	0.0252144
Dscam	13508	16	69.932	2.53104	0.312776	8.09217	5.86116e-16	2.07797e-15
Dsg1a	13510	18	1360.03	2.19849	0.0658128	33.4052	1.15059e-244	6.02198e-243
Epyc	13516	10	842.111	-0.385114	0.0881024	-4.37121	1.23562e-05	2.6337e-05
Dst	13518	1	6817.59	0.37326	0.0529471	7.04968	1.79329e-12	5.50758e-12
Slc26a2	13521	18	665.874	0.56521	0.113933	4.96088	7.01737e-07	1.63051e-06
Adam18	13524	8	4096.92	-1.08116	0.0814583	-13.2726	3.33946e-40	2.17108e-39
Adam26a	13525	8	1115.79	2.40991	0.0820539	29.3698	1.33581e-189	4.20733e-188
Adam24	13526	8	2335.26	2.2169	0.0724813	30.5858	1.88995e-205	6.83093e-204
Dusp2	13537	2	27.9979	1.19539	0.318828	3.74931	0.00017732	0.000343651
Dvl1	13542	4	4427.66	-1.5435	0.0570576	-27.0516	3.65642e-161	9.09618e-160
Dvl2	13543	11	739.616	-1.38021	0.0748326	-18.4439	5.83631e-76	6.51937e-75
Dyrk1b	13549	7	5796.82	0.910598	0.0463985	19.6256	9.34915e-86	1.17367e-84
E2f1	13555	2	125.913	1.03147	0.161567	6.3842	1.72295e-10	4.85377e-10
E2f3	13557	13	60.4191	0.734747	0.236929	3.10112	0.00192787	0.00339665
E2f5	13559	3	442.785	1.88048	0.09654	19.4788	1.66169e-84	2.04528e-83
E4f1	13560	17	394.36	-1.74229	0.103461	-16.8401	1.24125e-63	1.1811e-62
Mapre1	13589	2	1190.96	-0.840057	0.114206	-7.35563	1.90033e-13	6.09974e-13
Ebf2	13592	14	49.7226	1.10179	0.259566	4.24474	2.18843e-05	4.56799e-05
Ebf3	13593	7	59.8146	0.630487	0.218925	2.87992	0.00397772	0.00673893
Ebp	13595	X	67.1623	-1.27255	0.242978	-5.23732	1.62924e-07	3.93651e-07
Sparcl1	13602	5	161.155	0.456596	0.166074	2.74936	0.00597122	0.00990225
Opn3	13603	1	438.643	0.449731	0.0893854	5.03137	4.86977e-07	1.14432e-06
Eda	13607	X	16.803	1.94221	0.597027	3.25314	0.00114137	0.00205758
Edar	13608	10	57.31	-2.35374	0.257781	-9.13077	6.80118e-20	2.72016e-19
Edn1	13614	13	27.9203	-2.74741	0.409719	-6.70561	2.00572e-11	5.90206e-11
Phc1	13619	6	5225.18	0.443947	0.0582525	7.62107	2.51581e-14	8.33783e-14
Eef1a1	13627	9	39307.6	-0.272962	0.0943455	-2.89322	0.00381311	0.00648435
Eef2	13629	10	34566.9	0.37266	0.0839382	4.4397	9.00847e-06	1.93936e-05
Eef2k	13631	7	548.15	0.650165	0.0990103	6.56664	5.14645e-11	1.48808e-10
Efna2	13637	10	40.5546	1.38311	0.28406	4.8691	1.12107e-06	2.56864e-06
Efna3	13638	3	90.4817	2.38251	0.265019	8.98995	2.47333e-19	9.7594e-19
Efna4	13639	3	11.9874	1.48944	0.481623	3.09255	0.00198446	0.00349111
Efnb3	13643	11	61.4736	0.521731	0.237762	2.19434	0.028211	0.0425614
Efs	13644	14	14.8455	0.995243	0.429591	2.31672	0.0205188	0.031666
Egf	13645	3	189.053	-1.33722	0.162273	-8.24057	1.71393e-16	6.18334e-16
Klk1b9	13648	7	43.6433	1.92998	0.275943	6.99413	2.66912e-12	8.15203e-12
Egfr	13649	11	53.6466	1.67158	0.281492	5.9383	2.88e-09	7.65482e-09
Egr1	13653	18	546.939	-0.675518	0.101247	-6.67196	2.52415e-11	7.40166e-11
Egr3	13655	14	340.749	1.91845	0.12615	15.2077	3.14591e-52	2.5256e-51
Ehd1	13660	19	7905.27	0.870954	0.0684535	12.7233	4.38915e-37	2.68339e-36
Eif1a	13664	18	1340.83	-0.558945	0.0713927	-7.82916	4.91156e-15	1.67888e-14
Eif2ak3	13666	6	59.7355	0.67473	0.234548	2.87673	0.00401824	0.00680497
Eif3a	13669	19	5288.44	0.537373	0.0585196	9.18278	4.20098e-20	1.68939e-19
Eif4a1	13681	11	2336.07	-0.265795	0.0836269	-3.17834	0.00148121	0.00263949
Eif4a2	13682	16	2917.54	-1.57288	0.0549192	-28.6399	2.14351e-180	6.31174e-179
Eif4e	13684	3	3411.63	0.327437	0.0808015	4.05236	5.0703e-05	0.000102722
Eif4ebp1	13685	8	164.861	1.49281	0.151962	9.82359	8.91135e-23	3.88382e-22
Eif4ebp2	13688	10	1079.01	-0.5573	0.0865557	-6.43863	1.20558e-10	3.41975e-10
Cela2a	13706	4	13.5421	1.08742	0.435465	2.49714	0.01252	0.0199357
Elf1	13709	14	218.337	-0.761308	0.120663	-6.30938	2.80156e-10	7.81617e-10
Ell	13716	8	807.434	-0.896038	0.105809	-8.46848	2.48624e-17	9.23205e-17
Aimp1	13722	3	1379.15	-0.392125	0.0866687	-4.52441	6.05646e-06	1.32093e-05
Emb	13723	13	105.89	-1.30667	0.210884	-6.19616	5.78586e-10	1.59032e-09
Emd	13726	X	228.1	2.05043	0.122171	16.7833	3.23142e-63	3.05607e-62
Mark2	13728	19	3038.29	-3.32086	0.103364	-32.1279	1.79845e-226	7.89083e-225
Emp3	13732	7	173.621	-0.97314	0.206562	-4.71112	2.46365e-06	5.50746e-06
Adgre1	13733	17	52.1123	1.65068	0.301426	5.47622	4.34498e-08	1.08458e-07
Emx1	13796	6	5.00683	-2.3069	0.939193	-2.45625	0.0140394	0.0222166
Emx2	13797	19	417.691	-0.48586	0.129244	-3.75925	0.00017042	0.000330752
En2	13799	5	77.0575	-2.02627	0.214915	-9.42827	4.16913e-21	1.73432e-20
Enah	13800	1	2995.91	2.0954	0.064407	32.5337	3.55716e-232	1.64675e-230
Enc1	13803	13	223.907	-1.2956	0.115344	-11.2324	2.82552e-29	1.45977e-28
Eno1	13806	4	3086.28	0.297874	0.068503	4.34834	1.37172e-05	2.91219e-05
Eno3	13808	11	1413.4	-2.1087	0.124584	-16.9258	2.90171e-64	2.7876e-63
Epas1	13819	17	303.462	-0.814229	0.129236	-6.30031	2.97042e-10	8.27682e-10
Epb41l1	13821	2	158.279	1.598	0.178319	8.96144	3.20471e-19	1.25918e-18
Epb41l2	13822	10	5647.49	2.27067	0.0722496	31.4281	8.36469e-217	3.33793e-215
Epb41l3	13823	17	841.487	0.903503	0.0671008	13.4648	2.51839e-41	1.66865e-40
Epb41l4a	13824	18	204.743	1.56039	0.149574	10.4322	1.7671e-25	8.27401e-25
Dmtn	13829	14	65.5567	1.77831	0.290855	6.11406	9.71265e-10	2.64085e-09
Stom	13830	2	1589.55	-2.4212	0.0901847	-26.8471	9.12667e-159	2.22959e-157
Epc1	13831	18	1243.68	-0.268729	0.0893732	-3.00681	0.00264001	0.00458131
Epha2	13836	4	58.5267	-1.56018	0.231073	-6.75188	1.45938e-11	4.31672e-11
Epha3	13837	16	51.2922	1.56061	0.251626	6.2021	5.57159e-10	1.53358e-09
Epha6	13840	16	38.2653	1.33295	0.28615	4.65822	3.18951e-06	7.0772e-06
Ephb4	13846	5	63.6484	0.579029	0.229655	2.5213	0.0116922	0.0186953
Ephb6	13848	6	33.4015	0.943226	0.421923	2.23554	0.0253818	0.0386401
Ephx1	13849	1	56.6433	-2.17685	0.282347	-7.70983	1.25983e-14	4.23337e-14
Stx2	13852	5	1105.31	1.04804	0.112585	9.30884	1.29237e-20	5.29742e-20
Epm2a	13853	10	39.8342	0.902705	0.285714	3.15947	0.00158054	0.00280996
Epn1	13854	7	1440.29	0.406073	0.0645341	6.29237	3.12651e-10	8.70213e-10
Epn2	13855	11	1263.22	-1.64042	0.127191	-12.8973	4.65972e-38	2.89599e-37
Eps15	13858	4	3728.77	-0.322352	0.0771557	-4.17794	2.94163e-05	6.07334e-05
Eps15l1	13859	8	280.768	-0.603925	0.121124	-4.98602	6.16363e-07	1.43859e-06
Eps8	13860	6	107.244	-1.51258	0.193782	-7.80561	5.92155e-15	2.0163e-14
Nr2f6	13864	8	91.8731	0.806595	0.202698	3.9793	6.91188e-05	0.000138694
Erbb3	13867	10	30.7995	0.805944	0.287676	2.80157	0.00508549	0.00850872
Erbb4	13869	1	18.2784	-2.81824	0.509071	-5.53604	3.0939e-08	7.78796e-08
Ercc2	13871	7	1198.79	-2.23616	0.0947294	-23.6058	3.36408e-123	6.12339e-122
Ercc3	13872	18	1435.05	0.260019	0.0854299	3.04365	0.00233726	0.00407761
Erf	13875	7	420.515	1.48158	0.113565	13.0461	6.68921e-39	4.22731e-38
Erh	13877	12	1412.55	-0.484258	0.0757846	-6.38993	1.65965e-10	4.67993e-10
Esd	13885	14	157.904	0.376831	0.170934	2.20453	0.0274868	0.0415862
Ptprv	13924	1	376.916	-3.19714	0.335342	-9.53397	1.51374e-21	6.3737e-21
Amz2	13929	11	5046.05	0.226336	0.0777766	2.91008	0.00361338	0.00616073
Esx1	13984	X	565.69	2.32803	0.0950273	24.4986	1.5306e-132	2.99299e-131
Smarcad1	13990	6	347.718	0.603139	0.235815	2.55768	0.0105374	0.0169347
Khdrbs3	13992	15	2034.79	-0.709766	0.113682	-6.24346	4.27993e-10	1.1834e-09
Fgd6	13998	10	1176.57	-0.294058	0.123431	-2.38237	0.0172017	0.0268238
Drosha	14000	15	1005.09	-0.175524	0.0692685	-2.53397	0.0112779	0.0180672
Chchd2	14004	5	1841.56	-0.486052	0.0707984	-6.8653	6.63534e-12	1.99173e-11
Celf2	14007	2	360.742	0.553375	0.149854	3.69275	0.000221843	0.000426563
Etv2	14008	7	25.1087	1.75982	0.357976	4.91602	8.83235e-07	2.03934e-06
Etv1	14009	12	125.823	1.80061	0.213339	8.44013	3.16973e-17	1.17305e-16
Etv6	14011	6	205.923	1.45494	0.228324	6.37228	1.86232e-10	5.24221e-10
Mpzl2	14012	9	24.7617	0.737497	0.324205	2.27479	0.0229186	0.0351297
Evi5	14020	5	630.425	1.37882	0.10639	12.96	2.06167e-38	1.29133e-37
Evl	14026	12	421.982	0.296482	0.102945	2.88002	0.00397651	0.00673753
Evpl	14027	11	81.9759	0.851926	0.214283	3.9757	7.01736e-05	0.000140778
Evx2	14029	2	2.47102	4.05687	1.36652	2.96877	0.00298993	0.00515206
Ewsr1	14030	11	9519.18	-0.574778	0.0586641	-9.79779	1.15073e-22	4.99668e-22
Ext1	14042	15	143.089	1.70935	0.170874	10.0036	1.46928e-23	6.55749e-23
Ext2	14043	2	332.695	0.29975	0.116973	2.56256	0.0103903	0.016715
Muc4	140474	16	450.791	2.20757	0.109396	20.1797	1.47738e-90	1.9726e-89
Eya1	14048	1	14.7981	1.76493	0.557363	3.16656	0.00154252	0.00274512
Man2a2	140481	7	4491.01	-1.75633	0.0680582	-25.8063	7.54234e-147	1.67336e-145
Igf2bp1	140486	11	279.795	1.14531	0.174903	6.54826	5.82124e-11	1.67934e-10
Igf2bp3	140488	6	2073.18	0.810322	0.0759196	10.6734	1.35543e-26	6.54092e-26
Ppp1r3a	140491	6	47.452	1.87517	0.257512	7.28187	3.29221e-13	1.0442e-12
Kcnn2	140492	18	19.6481	1.6426	0.464572	3.53573	0.000406658	0.000764428
Kcnn3	140493	3	72.241	0.530561	0.200804	2.64219	0.00823728	0.0134142
Rxfp2	140498	5	187.006	-0.581106	0.14921	-3.89456	9.83759e-05	0.000194721
Ube2j2	140499	4	2373.79	-0.398518	0.0646675	-6.16257	7.15755e-10	1.96033e-09
Eya3	14050	4	1161.74	0.592746	0.0961244	6.16644	6.98426e-10	1.91405e-09
Eya4	14051	10	619.929	1.82312	0.0887431	20.5438	8.74495e-94	1.20503e-92
Eri3	140546	4	1070.43	-0.713826	0.0655043	-10.8974	1.18615e-27	5.88338e-27
Ezh1	14055	11	502.825	-0.648957	0.0974163	-6.66169	2.70695e-11	7.92715e-11
Smc1b	140557	15	6253.55	0.552929	0.0951006	5.81415	6.0943e-09	1.58964e-08
Igsf8	140559	1	165.033	-1.24573	0.161577	-7.70981	1.26008e-14	4.23339e-14
Sfxn1	14057	13	42.8434	-0.989074	0.263074	-3.75968	0.000170132	0.000330228
Plxnb2	140570	15	1295.85	-0.614423	0.0691695	-8.88285	6.51691e-19	2.53295e-18
Elmo2	140579	2	247.182	-1.46604	0.141085	-10.3912	2.71936e-25	1.26755e-24
Elmo1	140580	13	326.428	0.917311	0.163248	5.61913	1.91918e-08	4.88252e-08
F13b	14060	1	2.50642	2.62488	1.17848	2.22735	0.025924	0.0394246
Ubox5	140629	2	423.931	-1.43176	0.0951005	-15.0552	3.1919e-51	2.51896e-50
Ube4a	140630	9	1845.93	-1.66414	0.0982928	-16.9304	2.68567e-64	2.58287e-63
F3	14066	3	38.4187	-2.22079	0.337195	-6.58608	4.51595e-11	1.30964e-10
F5	14067	1	266.932	1.9721	0.117834	16.7363	7.1336e-63	6.69981e-62
F8	14069	X	33.4663	1.78281	0.522556	3.41171	0.000645561	0.00119329
F8a	14070	X	56.4984	1.905	0.234328	8.12965	4.30531e-16	1.53439e-15
Col26a1	140709	5	67.2977	1.14382	0.374246	3.05634	0.0022406	0.00391866
Caskin2	140721	11	78.0299	0.841789	0.194211	4.3344	1.46162e-05	3.09409e-05
Cacng5	140723	11	148.354	2.83855	0.177728	15.9713	2.02468e-57	1.76352e-56
Faah	14073	4	1292.54	-1.94887	0.0778907	-25.0206	3.65227e-138	7.45588e-137
Sec63	140740	10	2139.44	-0.478865	0.0808144	-5.92549	3.11364e-09	8.25593e-09
Sesn1	140742	10	253.492	-1.11373	0.11075	-10.0562	8.62563e-24	3.86827e-23
Fabp3	14077	4	63.1371	-2.07296	0.23296	-8.89835	5.66832e-19	2.20653e-18
Bmp2k	140780	5	805.303	-0.723231	0.0719372	-10.0536	8.85352e-24	3.96744e-23
Myh7	140781	14	43.9279	0.865263	0.270285	3.2013	0.00136809	0.0024483
Fabp1	14080	6	5.09703	2.66028	0.839089	3.17044	0.00152209	0.00270904
Acsl1	14081	8	6644.02	2.14858	0.0760302	28.2596	1.08613e-175	3.0849e-174
Ttbk2	140810	2	8438.81	0.530382	0.0829591	6.39329	1.62354e-10	4.57882e-10
Fadd	14082	7	87.2619	-0.400392	0.181861	-2.20163	0.0276914	0.0418599
Ptk2	14083	15	1767.47	0.314038	0.0603461	5.20395	1.95097e-07	4.69458e-07
Fah	14085	7	38.0884	-1.39866	0.312883	-4.47025	7.81297e-06	1.68982e-05
Nek8	140859	11	373.097	-1.23509	0.12194	-10.1286	4.12313e-24	1.86519e-23
Fscn1	14086	5	208.172	0.800491	0.131572	6.08407	1.17169e-09	3.17356e-09
Fanca	14087	8	472.821	-1.0859	0.124076	-8.75189	2.0981e-18	8.03612e-18
Fancc	14088	13	255.771	-0.614571	0.130098	-4.72391	2.31353e-06	5.17974e-06
Lnx2	140887	5	397.343	-0.74715	0.0897452	-8.32524	8.41594e-17	3.07076e-16
Caln1	140904	5	40.7684	1.13353	0.295007	3.84239	0.000121844	0.000239054
Dclre1b	140917	3	212.306	1.00513	0.166153	6.04945	1.45342e-09	3.91858e-09
Slc17a6	140919	7	79.5011	2.03254	0.297037	6.84272	7.77011e-12	2.32839e-11
Fasl	14103	1	22.3765	1.91945	0.375637	5.10987	3.2238e-07	7.66016e-07
Fasn	14104	11	1643.99	-0.320688	0.080841	-3.9669	7.28133e-05	0.000145808
Srsf10	14105	4	2710.87	-1.02731	0.0735898	-13.96	2.73405e-44	1.9159e-43
Fat1	14107	8	804.964	0.589685	0.116495	5.0619	4.15099e-07	9.79468e-07
Fbl	14113	7	513.087	0.231326	0.0878862	2.63211	0.00848575	0.0137921
Fbln2	14115	6	20.8406	-0.977741	0.377325	-2.59125	0.00956293	0.0154376
Fbn1	14118	2	114.758	1.38498	0.182957	7.56999	3.73257e-14	1.23102e-13
Fbn2	14119	18	2369.02	-2.9059	0.144296	-20.1385	3.3914e-90	4.51453e-89
Fbp1	14121	13	10713.9	-0.230557	0.088245	-2.61269	0.00898322	0.0145604
Fbrs	14123	7	1940.06	-1.37214	0.101276	-13.5486	8.07617e-42	5.38757e-41
Fcer2a	14128	8	15.3907	-2.1506	0.500965	-4.29291	1.76345e-05	3.71167e-05
Fcgr2b	14130	1	152.409	-1.03307	0.163691	-6.3111	2.77056e-10	7.73213e-10
Fcgr3	14131	1	1263.56	-1.07466	0.0902278	-11.9105	1.04292e-32	5.80835e-32
Fdft1	14137	14	8785.69	1.05398	0.0849454	12.4077	2.37316e-35	1.38648e-34
Fdx1	14148	9	564.586	-0.587966	0.0901647	-6.52102	6.98295e-11	2.00562e-10
Fdxr	14149	11	185.331	-1.45861	0.132918	-10.9738	5.10929e-28	2.56162e-27
Fech	14151	18	1232.92	-1.20755	0.0742183	-16.2703	1.60442e-59	1.4314e-58
Fem1a	14154	17	472.593	-0.730758	0.117857	-6.20038	5.6326e-10	1.54916e-09
Fem1b	14155	9	6124.32	1.1491	0.072202	15.915	4.98521e-57	4.30814e-56
Fen1	14156	19	389.799	1.54768	0.0970646	15.9448	3.09507e-57	2.68655e-56
Fer	14158	17	988.614	0.470138	0.0715204	6.57348	4.91519e-11	1.42285e-10
Fgd1	14163	X	56.2898	0.632141	0.217216	2.9102	0.00361199	0.00615896
Fgf10	14165	13	82.4667	2.98218	0.237023	12.5818	2.65908e-36	1.59094e-35
Fgf12	14167	16	299.634	1.56335	0.107688	14.5174	9.40054e-48	7.02571e-47
Fgf14	14169	14	183.524	1.39314	0.130682	10.6605	1.558e-26	7.49182e-26
Fgf6	14177	6	5.03227	-2.15509	0.898711	-2.39798	0.0164856	0.0258006
Fgf8	14179	19	13.6812	-1.54381	0.481819	-3.20414	0.00135467	0.00242501
Fgfr3	14184	5	145.631	-1.63819	0.169885	-9.64292	5.26661e-22	2.24541e-21
Fgfr4	14186	13	55.3292	-1.04578	0.265993	-3.93163	8.43716e-05	0.000168068
Akr1b8	14187	6	218.798	-1.00399	0.138375	-7.25557	3.9997e-13	1.26541e-12
Fgl2	14190	5	68.0068	1.11506	0.210552	5.29589	1.18436e-07	2.88531e-07
Fh1	14194	1	445.578	1.32924	0.11714	11.3475	7.63027e-30	3.99592e-29
Fhl1	14199	X	106.773	-0.620763	0.176591	-3.51525	0.000439335	0.000823397
Fhl2	14200	1	15.301	1.38557	0.451065	3.07178	0.00212786	0.00373147
Fhl4	14202	10	56159.9	0.315745	0.090734	3.47989	0.000501612	0.000935542
Il4i1	14204	7	150.897	-1.72162	0.147271	-11.6902	1.43088e-31	7.78949e-31
Ppm1g	14208	5	11591.6	0.441497	0.0780532	5.65636	1.54619e-08	3.95815e-08
Smc2	14211	4	1776.92	-0.518486	0.105932	-4.89454	9.85381e-07	2.26777e-06
Sh3pxd2a	14218	19	93.4086	0.444351	0.207791	2.13845	0.0324805	0.0485007
Fkbp2	14227	19	211.625	-0.599481	0.130313	-4.60031	4.21858e-06	9.28815e-06
Fkbp10	14230	11	155.89	0.709758	0.142316	4.98719	6.12653e-07	1.43012e-06
Fkbp7	14231	2	203.837	0.923717	0.12011	7.69062	1.46428e-14	4.90263e-14
Fkbp8	14232	8	1869.07	-0.324792	0.0605603	-5.36312	8.17986e-08	2.0111e-07
Foxc2	14234	8	14.6907	1.50172	0.438913	3.42145	0.000622871	0.00115268
Foxm1	14235	6	3992.51	0.932061	0.0597	15.6124	5.99357e-55	5.02446e-54
Foxn2	14236	17	152.829	1.08384	0.148821	7.28288	3.26757e-13	1.03695e-12
Foxs1	14239	2	14.2124	-1.10001	0.425592	-2.58465	0.00974771	0.0157229
Lpin1	14245	12	7588.92	1.29071	0.0684313	18.8614	2.37002e-79	2.75923e-78
Flii	14248	11	570.393	-0.441824	0.153218	-2.88363	0.00393122	0.0066704
Flot2	14252	11	423.41	-0.228485	0.103351	-2.21078	0.0270513	0.0409936
Flt1	14254	5	129.514	0.430448	0.155041	2.77634	0.00549742	0.00916479
Flt3	14255	5	84.4787	-0.779378	0.180975	-4.30655	1.65818e-05	3.49594e-05
Flt3l	14256	7	6.80301	1.501	0.65734	2.28344	0.0224042	0.0343862
Flt4	14257	11	79.9489	1.39514	0.204821	6.81152	9.65702e-12	2.88354e-11
Fmn1	14260	2	1217.42	0.759436	0.0620658	12.236	1.99684e-34	1.14986e-33
Fmo3	14262	1	6.98165	2.37091	0.714674	3.31747	0.000908368	0.00165207
Fmr1	14265	X	666.596	1.74325	0.0889537	19.5973	1.63106e-85	2.04177e-84
Fn1	14268	1	786.232	0.812544	0.13867	5.85956	4.64084e-09	1.21754e-08
Zcchc14	142682	8	1140.1	-1.66969	0.109044	-15.312	6.35656e-53	5.15718e-52
Asb14	142687	14	67.4958	-1.44479	0.288468	-5.00851	5.48535e-07	1.28487e-06
Fnbp1	14269	2	216.613	-1.15375	0.189	-6.10448	1.03135e-09	2.80162e-09
Fnta	14272	8	2574.97	-0.685159	0.0992814	-6.90118	5.15727e-12	1.55627e-11
Folr1	14275	7	43.8364	-1.44504	0.30596	-4.72296	2.32436e-06	5.20332e-06
Fos	14281	12	575.128	-0.388742	0.0943606	-4.11975	3.79287e-05	7.76266e-05
Fosb	14282	7	581.085	-0.923364	0.107137	-8.61854	6.78159e-18	2.56297e-17
Fosl1	14283	19	60.2254	1.02252	0.213889	4.78059	1.74779e-06	3.94365e-06
Fpgs	14287	2	516.017	1.33316	0.119501	11.1561	6.68799e-29	3.42716e-28
Frat1	14296	19	3152.63	2.27025	0.0622965	36.4427	8.98638e-291	7.62028e-289
Ncs1	14299	2	490.252	1.05625	0.0791649	13.3425	1.31068e-40	8.57167e-40
Frg1	14300	8	887.065	-0.187345	0.0696894	-2.68828	0.00718202	0.0117904
Fshr	14309	17	21.1051	-1.61929	0.424909	-3.8109	0.000138464	0.000270397
Brd2	14312	17	9605	0.338731	0.0579257	5.84767	4.98492e-09	1.30509e-08
Fstl1	14314	16	121.911	-0.788287	0.215358	-3.66035	0.000251867	0.000482034
Fth1	14319	19	1987.64	-1.0556	0.0891547	-11.8401	2.42203e-32	1.34002e-31
Aktip	14339	8	398.837	0.568568	0.0946354	6.00799	1.87843e-09	5.03521e-09
Fut2	14344	7	11.7304	1.16239	0.515131	2.2565	0.0240396	0.0367521
Fv1	14349	4	14.349	-1.03287	0.435943	-2.36927	0.0178235	0.0277369
Gm45799	14356	7	144.713	-0.534585	0.179424	-2.97946	0.00288758	0.00498688
Timm10b	14356	7	144.713	-0.534585	0.179424	-2.97946	0.00288758	0.00498688
Fxr1	14359	3	14001.7	0.600536	0.0854298	7.02958	2.07161e-12	6.3502e-12
Fyn	14360	10	322.728	-0.741875	0.114624	-6.47223	9.65664e-11	2.7556e-10
Fzd1	14362	5	35.228	-2.40701	0.318421	-7.5592	4.05545e-14	1.33476e-13
Fzd3	14365	14	212.314	0.773062	0.113455	6.8138	9.50549e-12	2.83925e-11
Fzd4	14366	7	42.1531	-0.850115	0.32353	-2.62762	0.00859838	0.0139658
Fzd5	14367	1	49.0488	-1.06408	0.258677	-4.11356	3.89602e-05	7.96268e-05
Fzd6	14368	15	160.86	-1.68811	0.212981	-7.92611	2.26113e-15	7.85538e-15
Fzd7	14369	1	19.9692	-1.44838	0.385409	-3.75803	0.000171258	0.000332267
Fzd8	14370	18	24.2589	-2.40226	0.414337	-5.79785	6.7169e-09	1.74842e-08
Xrcc6	14375	15	408.111	0.563966	0.107087	5.26642	1.39113e-07	3.376e-07
Ganab	14376	19	1847.87	-0.36763	0.0556526	-6.60579	3.95406e-11	1.14934e-10
G6pd2	14380	5	1256.8	2.34172	0.0713572	32.8168	3.38946e-236	1.61141e-234
Slc37a4	14385	9	42.337	1.18972	0.308131	3.86109	0.000112883	0.000222362
Gaa	14387	11	532.001	0.290824	0.101395	2.86823	0.00412774	0.00698237
Gab1	14388	8	575.265	-0.96518	0.0818886	-11.7865	4.58218e-32	2.51934e-31
Gab2	14389	7	761.233	-0.940736	0.0774365	-12.1485	5.84397e-34	3.33363e-33
Gabpa	14390	16	898.758	-0.341118	0.0715963	-4.76446	1.8936e-06	4.26228e-06
Gabpb1	14391	2	466.807	0.32165	0.0905969	3.55034	0.000384728	0.000724595
Gabra1	14394	11	160.367	-2.33749	0.152488	-15.329	4.89223e-53	3.97646e-52
Gabrb1	14400	5	17.3507	2.50787	0.801088	3.13058	0.00174459	0.00308977
Gabrb3	14402	7	32.7465	1.73162	0.49907	3.46969	0.000521066	0.000970801
Gabre	14404	X	8.26006	1.91656	0.623659	3.0731	0.0021185	0.00371543
Gabrg3	14407	7	16.5281	1.9016	0.560066	3.39532	0.000685482	0.00126311
Slc6a12	14411	6	10.5565	-1.23739	0.554799	-2.23033	0.0257254	0.0391429
Gad1	14415	2	12.7361	1.47898	0.514992	2.87186	0.0040807	0.00690609
Gad2	14417	2	41.0642	1.77572	0.357533	4.96659	6.81389e-07	1.58512e-06
B4galnt1	14421	10	595.936	-1.54803	0.0782259	-19.7892	3.68602e-87	4.71116e-86
Galnt1	14423	18	388.591	-0.235005	0.0909085	-2.58507	0.0097359	0.0157067
Galnt3	14425	2	7365.13	0.193364	0.0431718	4.47894	7.50135e-06	1.62462e-05
Gamt	14431	10	79.9727	-1.27097	0.188597	-6.73907	1.59406e-11	4.70797e-11
Gapdh	14433	6	629.866	0.393883	0.120616	3.2656	0.00109232	0.00197321
Gapdhs	14447	7	11939.4	2.08316	0.0493258	42.2326	0	0
Gart	14450	16	491.236	-0.823549	0.0896569	-9.18556	4.094e-20	1.6475e-19
Gas1	14451	13	17.6762	-0.826219	0.373227	-2.21372	0.0268482	0.0407073
Gas2	14453	7	159.354	-0.892199	0.167379	-5.3304	9.79986e-08	2.39803e-07
Gas6	14456	8	333.177	-1.23428	0.0993744	-12.4205	2.02335e-35	1.18446e-34
Gata1	14460	X	51.2585	-0.76708	0.253441	-3.02666	0.00247271	0.00430201
Gata2	14461	6	425.242	2.34329	0.101134	23.1702	9.10678e-119	1.58564e-117
Gata4	14463	14	152.751	-1.82573	0.167098	-10.9261	8.65021e-28	4.30874e-27
Gata6	14465	18	179.731	1.22846	0.137537	8.93186	4.18905e-19	1.63683e-18
Gba	14466	3	112.376	-0.909071	0.164812	-5.5158	3.47206e-08	8.7125e-08
Usp15	14479	10	7648.02	1.25934	0.0740022	17.0176	6.08478e-65	5.91314e-64
Gcsam	14525	16	37.1645	-3.53952	0.373238	-9.48328	2.46414e-21	1.03075e-20
Gcgr	14527	11	6.91596	1.51555	0.686211	2.20858	0.0272042	0.0412082
Gcm1	14531	9	32.7098	0.821693	0.316993	2.59215	0.00953795	0.0154001
Bloc1s1	14533	10	337.422	-0.545772	0.128506	-4.24704	2.16614e-05	4.52467e-05
Kat2a	14534	11	806.229	-0.975303	0.073649	-13.2426	4.98073e-40	3.2215e-39
Nr6a1	14536	2	4913.73	1.77686	0.0500635	35.4922	6.47403e-276	4.478e-274
Gda	14544	19	17.9604	-1.20378	0.424613	-2.83501	0.00458244	0.007707
Gdap1	14545	1	73.3909	2.39745	0.366971	6.53308	6.4432e-11	1.85331e-10
Gdap2	14547	3	984.062	0.467553	0.0990583	4.71998	2.3587e-06	5.27886e-06
Mrps33	14548	6	203.855	-0.742111	0.154693	-4.7973	1.60819e-06	3.64124e-06
Gpd1	14555	15	186.369	-1.3428	0.152492	-8.80571	1.30029e-18	5.01192e-18
Gdf3	14562	6	10.7699	-2.74107	0.633805	-4.32479	1.52675e-05	3.22694e-05
Gdf9	14566	11	41.8899	-1.30852	0.293661	-4.4559	8.35433e-06	1.80227e-05
Gdi1	14567	X	92.6063	0.968788	0.198507	4.88038	1.05884e-06	2.43143e-06
Gdi2	14569	13	6195.23	0.551026	0.0766563	7.18827	6.56184e-13	2.05427e-12
Gpd2	14571	2	7240.85	2.10582	0.0762675	27.6109	8.22177e-168	2.18397e-166
Gdnf	14573	15	14.8406	-1.21274	0.429716	-2.8222	0.00476956	0.00800357
Gem	14579	4	315.947	-2.47219	0.116163	-21.282	1.6651e-100	2.4292e-99
Gfap	14580	11	156.695	-0.832255	0.177235	-4.69578	2.65588e-06	5.91619e-06
Gfi1	14581	5	160.427	-2.45599	0.161478	-15.2095	3.0604e-52	2.45807e-51
Gfpt1	14583	6	3796.22	0.906165	0.0551133	16.4419	9.59179e-61	8.6982e-60
Gfra1	14585	19	108.784	0.358874	0.159408	2.25129	0.0243674	0.0372114
Gfra2	14586	14	538.666	1.48985	0.0881266	16.9058	4.07567e-64	3.909e-63
Gfra4	14588	2	448.081	-1.51882	0.104977	-14.4681	1.92818e-47	1.43016e-46
Ggh	14590	4	106.956	1.1465	0.166876	6.8704	6.40229e-12	1.92407e-11
Ggps1	14593	13	276.884	-0.782947	0.136351	-5.74214	9.34881e-09	2.41639e-08
B4galt1	14595	4	277.655	0.910555	0.125611	7.24901	4.19841e-13	1.3268e-12
Ghrh	14601	2	5.72952	2.17655	0.730662	2.97888	0.00289309	0.00499591
Cblif	14603	19	4.87981	2.58891	0.948435	2.72966	0.00633994	0.0104724
Tsc22d3	14605	X	335.207	0.886658	0.0973124	9.11146	8.12771e-20	3.24336e-19
Gja1	14609	10	412.986	-1.14003	0.112883	-10.0992	5.56965e-24	2.5067e-23
Gykl1	14625	18	11069.9	1.12815	0.0956701	11.7921	4.28815e-32	2.35842e-31
Gk2	14626	5	16963.5	0.37893	0.101244	3.74273	0.00018203	0.000352276
Ostm1	14628	10	105.266	-1.11847	0.164531	-6.79794	1.06123e-11	3.16021e-11
Gclc	14629	9	756.487	-1.41778	0.0860911	-16.4684	6.18823e-61	5.62908e-60
Gclm	14630	3	872.271	-0.857943	0.0797107	-10.7632	5.13432e-27	2.50579e-26
Gli1	14632	10	5.94545	1.75845	0.726709	2.41974	0.0155317	0.0244073
Gli2	14633	1	24.4833	1.417	0.35953	3.94126	8.1054e-05	0.000161613
Gli3	14634	13	92.203	0.711087	0.240426	2.95762	0.00310027	0.00533073
Glul	14645	1	2649.26	1.7121	0.0504973	33.9047	5.67048e-252	3.14515e-250
Hagh	14651	17	5440.37	0.224849	0.0781642	2.87662	0.00401956	0.00680655
Glrp1	14659	1	47.3119	2.17497	0.280109	7.76472	8.18229e-15	2.77111e-14
Slc6a9	14664	4	57.7329	0.586222	0.235905	2.48499	0.0129556	0.0205846
Gm2a	14667	11	3392.63	-0.552661	0.0634949	-8.70402	3.20326e-18	1.22266e-17
Gna11	14672	10	940.605	-0.855315	0.083062	-10.2973	7.24612e-25	3.34311e-24
Gna12	14673	5	707.807	-0.340636	0.0758125	-4.49314	7.01808e-06	1.52294e-05
Gna14	14675	19	43.2783	-0.756062	0.282486	-2.67646	0.00744047	0.0121909
Gnai2	14678	9	834.415	-0.369637	0.0762642	-4.84679	1.25473e-06	2.86521e-06
Gnai3	14679	3	1112.77	-0.791099	0.0888627	-8.90249	5.46067e-19	2.12616e-18
Gnal	14680	18	61.1529	1.48759	0.335035	4.4401	8.99165e-06	1.93597e-05
Gnao1	14681	8	1043.2	-1.35115	0.0932528	-14.4892	1.41877e-47	1.05454e-46
Gnat1	14685	9	50.4859	-1.25212	0.416239	-3.00819	0.0026281	0.00456199
Gnb2	14693	5	2871.48	-0.369502	0.093986	-3.93146	8.44324e-05	0.000168159
Rack1	14694	11	1629.09	-0.773074	0.0796201	-9.70953	2.74593e-22	1.18129e-21
Gng10	14700	4	727.64	-0.930824	0.0884431	-10.5245	6.65803e-26	3.15091e-25
Gng3	14704	19	28.0118	1.93907	0.3468	5.59132	2.25355e-08	5.71505e-08
Bscl2	14705	19	9607.96	-0.147407	0.0636631	-2.31542	0.0205899	0.0317535
Gng5	14707	3	2128.86	0.54309	0.0615542	8.82296	1.11472e-18	4.30324e-18
Gng8	14709	7	15.1394	-1.3187	0.482861	-2.73101	0.00631413	0.0104395
Gnpat	14712	8	6854.26	0.270846	0.0512377	5.28606	1.24981e-07	3.03974e-07
Gnrh1	14714	14	9.35283	-1.52742	0.553381	-2.76016	0.00577739	0.00959887
Gnrhr	14715	5	4.04018	2.97263	1.03733	2.86567	0.00416131	0.00703307
Got1	14718	19	174.709	1.99158	0.162606	12.2479	1.72384e-34	9.93957e-34
Gp1bb	14724	16	9.0621	-1.96521	0.687614	-2.85802	0.00426294	0.00719174
Lrp2	14725	2	68.283	1.22983	0.258064	4.76561	1.88284e-06	4.2386e-06
Lilr4b	14727	10	8.97047	1.56374	0.650124	2.40529	0.0161596	0.0253287
Lilrb4a	14728	10	8.59009	2.19661	0.64645	3.39796	0.000678914	0.00125206
Gpaa1	14731	15	287.983	-0.599367	0.120714	-4.96519	6.86351e-07	1.59624e-06
Gpam	14732	19	154.025	-0.392193	0.169665	-2.31158	0.020801	0.0320595
Gpc3	14734	X	17.5268	0.999776	0.418883	2.38677	0.0169972	0.0265401
Gpc4	14735	X	160.96	-0.834588	0.132222	-6.31202	2.75408e-10	7.68736e-10
Gpr65	14744	12	46.6892	1.523	0.255866	5.95233	2.64348e-09	7.03784e-09
Lpar1	14745	4	641.954	2.25846	0.132606	17.0313	4.80838e-65	4.69603e-64
Cmklr1	14747	5	611.359	1.84731	0.0792989	23.2955	4.92575e-120	8.70545e-119
Gpi1	14751	7	3308.93	1.34361	0.0505488	26.5804	1.14317e-155	2.73214e-154
Pigq	14755	17	130.738	-0.462038	0.170781	-2.70544	0.00682147	0.0112257
Gpm6b	14758	X	251.283	-1.95046	0.125865	-15.4964	3.66858e-54	3.03928e-53
Gpr19	14760	6	737.953	-0.424771	0.0942446	-4.50711	6.57153e-06	1.42956e-05
Gpr37	14763	6	177.125	-1.70019	0.273762	-6.21048	5.28237e-10	1.45533e-09
Ptgdr2	14764	19	6.84268	1.53386	0.669132	2.29231	0.0218879	0.0336523
Gpr50	14765	X	10.1846	1.42357	0.641221	2.2201	0.0264121	0.0401014
Adgrg1	14766	8	316.772	-0.933725	0.169421	-5.51127	3.56245e-08	8.93171e-08
Nmur1	14767	1	16.9197	2.22525	0.461227	4.82463	1.40265e-06	3.19018e-06
Gpx5	14780	13	2.3162	3.14469	1.40147	2.24386	0.0248416	0.0378832
Gsr	14782	8	379.012	0.788211	0.13513	5.83299	5.44437e-09	1.42242e-08
Grb10	14783	11	623.067	-0.936154	0.0982718	-9.52617	1.63188e-21	6.85638e-21
Grb7	14786	11	33.1412	0.688279	0.284131	2.4224	0.0154185	0.0242381
Rhpn1	14787	15	488.508	-0.700227	0.106971	-6.54596	5.91137e-11	1.70423e-10
Grcc10	14790	6	887.195	2.07849	0.0820089	25.3447	1.02844e-141	2.16722e-140
Emg1	14791	6	621.638	-0.630965	0.0898543	-7.02208	2.18582e-12	6.6968e-12
Lpcat3	14792	6	4498.73	-0.555532	0.0633983	-8.76256	1.90866e-18	7.32165e-18
Cdca3	14793	6	6362.84	0.410604	0.0518863	7.91354	2.50176e-15	8.66917e-15
Spsb2	14794	6	749.399	1.311	0.0888641	14.7528	2.95088e-49	2.27282e-48
Tle5	14797	10	298.462	-0.657025	0.107006	-6.14006	8.24927e-10	2.25233e-09
Grid1	14803	14	157.474	2.45543	0.194065	12.6526	1.08206e-36	6.55177e-36
Grid2	14804	6	6.88695	1.73269	0.708011	2.44726	0.0143947	0.0227319
Grik1	14805	16	22.3701	1.58285	0.360625	4.38919	1.13774e-05	2.43124e-05
Grik2	14806	10	272.037	0.268644	0.122547	2.19218	0.0283668	0.0427819
Grik3	14807	4	78.3523	0.881373	0.224768	3.92126	8.80861e-05	0.000175041
Grik5	14809	7	1659.21	-0.654431	0.136849	-4.78213	1.7345e-06	3.91465e-06
Grin2a	14811	16	12.8677	2.76895	0.767177	3.60927	0.000307054	0.000583413
Grin2b	14812	6	533.717	2.07644	0.0835604	24.8495	2.61513e-136	5.25947e-135
Grin2c	14813	11	18.751	-2.41871	0.465462	-5.19636	2.03231e-07	4.88298e-07
Nr3c1	14815	18	240.559	0.476919	0.115798	4.11856	3.81244e-05	7.7991e-05
Grm1	14816	10	275.615	2.12143	0.170361	12.4525	1.35537e-35	7.97136e-35
Cxcl1	14825	5	21.0554	-2.01106	0.411515	-4.88697	1.02398e-06	2.35352e-06
Pdia3	14827	2	11709.1	-0.837402	0.0632033	-13.2493	4.55253e-40	2.94886e-39
Hspa5	14828	2	15806.2	-0.791495	0.073311	-10.7964	3.57942e-27	1.75616e-26
Gsg1	14840	6	11583.9	2.15614	0.0595594	36.2016	5.74911e-287	4.67294e-285
Haspin	14841	11	16302.2	0.742635	0.072585	10.2313	1.43648e-24	6.57924e-24
Gss	14854	2	332.847	0.846815	0.138402	6.1185	9.44608e-10	2.56955e-09
Gsta2	14858	9	64.1454	-1.50709	0.224798	-6.7042	2.02517e-11	5.95631e-11
Gsta3	14859	1	29.5488	-1.02408	0.331149	-3.0925	0.00198481	0.00349138
Gsta4	14860	9	225.53	-0.984506	0.134048	-7.34446	2.06598e-13	6.61699e-13
Gstm1	14862	3	477.732	-1.24997	0.0862298	-14.4958	1.28872e-47	9.59898e-47
Gstm2	14863	3	466.542	-1.20151	0.0983403	-12.2179	2.49387e-34	1.43186e-33
Gstm4	14865	3	96.0842	1.6756	0.191484	8.7506	2.12221e-18	8.12668e-18
Gstm5	14866	3	23246.8	0.416347	0.0929693	4.47833	7.52298e-06	1.6291e-05
Gstm6	14867	3	188.091	-1.05896	0.146935	-7.20704	5.71826e-13	1.79496e-12
Gstp1	14870	19	187.692	-0.953014	0.128653	-7.40764	1.28563e-13	4.15309e-13
Gstt2	14872	10	752.965	-1.94811	0.0942455	-20.6706	6.37072e-95	8.88275e-94
Gtf2h1	14884	7	3724.94	-1.05537	0.088708	-11.8972	1.22446e-32	6.80437e-32
Gtf2h4	14885	17	389.533	-1.54041	0.107999	-14.2632	3.71207e-46	2.68996e-45
Gtf2i	14886	5	7093.55	-0.230355	0.0594498	-3.87478	0.000106721	0.00021067
Gtpbp1	14904	15	1132.75	-1.55774	0.13925	-11.1867	4.73913e-29	2.43486e-28
Thumpd3	14911	6	3135.62	-0.382055	0.0856656	-4.45984	8.20207e-06	1.77029e-05
Guca1a	14913	17	21.7699	1.55967	0.404099	3.85962	0.000113562	0.00022365
Gucy2d	14918	7	80.9028	2.41031	0.22977	10.4901	9.59095e-26	4.52192e-25
Guk1	14923	11	1048.73	-0.440937	0.109142	-4.04003	5.34447e-05	0.000108066
Magi1	14924	6	163.971	0.919309	0.136601	6.72987	1.69812e-11	5.01027e-11
Gk	14933	X	27.746	2.04539	0.454551	4.49981	6.80156e-06	1.47796e-05
H13	14950	2	1132.31	-0.316141	0.0669122	-4.72472	2.30431e-06	5.15976e-06
H1f0	14958	15	210.933	0.34875	0.12643	2.75843	0.00580789	0.009645
H2-Aa	14960	17	12.5401	1.03587	0.462745	2.23853	0.0251864	0.0383691
H2-Ab1	14961	17	22.1301	0.884649	0.364968	2.42391	0.0153545	0.0241439
H2-Bl	14963	17	44.2363	-1.22659	0.345062	-3.55468	0.000378441	0.00071321
H2-D1	14964	17	627.034	0.232063	0.076826	3.02063	0.00252253	0.00438434
H2-Eb1	14969	17	6.81701	2.45134	0.736511	3.32832	0.00087371	0.00159265
H2-K1	14972	17	746.326	-0.595725	0.0961621	-6.19501	5.82832e-10	1.60149e-09
Slc39a7	14977	17	527.139	-0.813706	0.115195	-7.06374	1.62082e-12	4.98484e-12
H2-Ke6	14979	17	174.943	-0.68354	0.140206	-4.87527	1.08658e-06	2.49253e-06
H2-DMa	14998	17	254.903	1.33839	0.12141	11.0237	2.93862e-28	1.48174e-27
H2-DMb1	14999	17	19.3824	-1.26012	0.544967	-2.31228	0.0207623	0.0320053
H2-DMb2	15000	17	49.76	-2.35249	0.467113	-5.03624	4.74771e-07	1.11624e-06
H3c14	15077	3	74.2917	-1.38219	0.205474	-6.72684	1.73385e-11	5.11485e-11
H3f3a	15078	1	9194.06	0.693172	0.0681229	10.1753	2.55577e-24	1.16332e-23
Hadh	15107	3	210.442	-0.960846	0.128046	-7.50394	6.19263e-14	2.02532e-13
Hal	15109	10	135.953	1.01172	0.159248	6.35312	2.10991e-10	5.92683e-10
Hand1	15110	11	5.33621	2.44389	0.818254	2.98671	0.00281994	0.00487676
Hand2	15111	8	23.9094	1.8421	0.366082	5.03194	4.85538e-07	1.14109e-06
Hao1	15112	2	21.1983	1.24377	0.358013	3.4741	0.000512575	0.000955384
Hars	15115	18	348.136	-0.462333	0.113854	-4.06075	4.89144e-05	9.92353e-05
Has1	15116	17	36.909	-2.93869	0.345445	-8.50698	1.78525e-17	6.66277e-17
Hba-a1	15122	11	10.1023	-2.20501	0.603663	-3.65272	0.000259481	0.000495853
Hc	15139	2	21.1092	-2.03102	0.515601	-3.93913	8.17764e-05	0.000163017
Hccs	15159	X	144.097	1.39456	0.154941	9.00058	2.24531e-19	8.86761e-19
Hcfc1	15161	X	761.547	1.00521	0.12787	7.86115	3.80629e-15	1.30665e-14
Hcn1	15165	13	19.0186	1.17147	0.4927	2.37765	0.0174233	0.0271453
Hcn3	15168	3	25.0071	1.68835	0.422826	3.99302	6.52372e-05	0.000131129
Hdac3	15183	18	946.011	-0.639872	0.0664139	-9.63461	5.71099e-22	2.43193e-21
Hdac5	15184	11	842.942	1.96425	0.0855382	22.9634	1.08185e-116	1.83654e-115
Hdac6	15185	X	658.311	-0.369382	0.088662	-4.16618	3.09748e-05	6.38389e-05
Hdc	15186	2	286.715	0.826196	0.138571	5.96225	2.48789e-09	6.63162e-09
Hdgf	15191	3	7468.39	-0.273387	0.0744988	-3.66968	0.000242859	0.0004654
Hdgfl2	15193	17	3274.95	-0.327772	0.0582866	-5.62345	1.87181e-08	4.76751e-08
Htt	15194	5	2703.51	-1.08589	0.0870022	-12.4812	9.45631e-36	5.58201e-35
Hebp1	15199	6	25.3659	-0.849961	0.387428	-2.19385	0.028246	0.0426105
Hbegf	15200	18	37.8873	-2.04796	0.339246	-6.03678	1.57216e-09	4.23096e-09
Hells	15201	19	1240.55	0.676243	0.110153	6.13911	8.29829e-10	2.26466e-09
Gml2	15202	15	449.58	-0.703579	0.0854408	-8.23469	1.8002e-16	6.48792e-16
Hfe	15216	13	103.835	-0.584617	0.195986	-2.98295	0.00285482	0.0049324
Foxq1	15220	13	111.502	-0.740542	0.168614	-4.39195	1.12341e-05	2.40149e-05
Foxd3	15221	4	4.23893	-2.81969	0.970939	-2.90408	0.00368329	0.00627205
Foxj1	15223	11	3242.5	2.89765	0.067899	42.6758	0	0
Foxg1	15228	12	52.3259	0.727401	0.24916	2.91941	0.00350691	0.00599253
Hgd	15233	16	23.3046	1.78056	0.364476	4.88527	1.03289e-06	2.37369e-06
Hgf	15234	5	14.0908	2.044	0.514923	3.96953	7.20152e-05	0.000144292
Mst1	15235	9	5.32675	-3.255	1.0522	-3.0935	0.0019781	0.00348027
Hhex	15242	19	42.9614	-1.13279	0.26444	-4.28375	1.83769e-05	3.86239e-05
Mfsd14a	15247	3	3741.89	-0.774052	0.0671533	-11.5267	9.68389e-31	5.1806e-30
Hic1	15248	11	11.7789	1.10725	0.503819	2.19771	0.02797	0.0422304
Hint1	15254	11	2208.17	-0.414488	0.0817616	-5.06947	3.98926e-07	9.42313e-07
Hipk1	15257	3	2330.35	0.982985	0.0593617	16.5592	1.37316e-61	1.26606e-60
Hipk2	15258	6	312.488	0.911918	0.121999	7.47479	7.73245e-14	2.51958e-13
Hipk3	15259	2	6170.96	0.723591	0.0788802	9.17329	4.58812e-20	1.84172e-19
H2ac18	15267	3	3404.74	1.02542	0.0658236	15.5782	1.02347e-54	8.53925e-54
H2ax	15270	9	810.3	-0.670485	0.0653519	-10.2596	1.07147e-24	4.9228e-24
Hk1	15275	10	19143.2	1.42866	0.05857	24.3924	2.0581e-131	4.0023e-130
Hk2	15277	6	290.104	-1.36854	0.121377	-11.2751	1.74263e-29	9.05611e-29
Tfb2m	15278	1	401.306	-0.616205	0.116333	-5.29692	1.1777e-07	2.8699e-07
Mnx1	15285	5	7.00163	1.71422	0.653572	2.62285	0.00871983	0.0141569
Hmgn1	15312	16	1575.21	1.34754	0.0944062	14.2739	3.18458e-46	2.30961e-45
Hmgn2	15331	4	926.303	0.388673	0.0845728	4.59572	4.31254e-06	9.48909e-06
Hmg20b	15353	10	173.808	-0.805532	0.136373	-5.90685	3.48709e-09	9.21842e-09
Hmgcl	15356	4	72.9302	-0.48863	0.184104	-2.6541	0.00795195	0.0129783
Hmgcs2	15360	3	154.382	-1.11611	0.149643	-7.45845	8.75492e-14	2.84434e-13
Hmga1	15361	17	1736.39	-0.775325	0.0771065	-10.0553	8.70942e-24	3.90485e-23
Hmga2	15364	10	38.7799	1.30957	0.289943	4.51665	6.28271e-06	1.36977e-05
Hmmr	15366	11	808.622	-1.14372	0.0733125	-15.6006	7.20691e-55	6.03014e-54
Hmox1	15368	8	131.664	-1.07977	0.160087	-6.74487	1.53167e-11	4.52521e-11
Hmox2	15369	16	7108.28	1.71169	0.067708	25.2805	5.24036e-141	1.09514e-139
Nr4a1	15370	15	722.264	1.823	0.0784769	23.2297	2.28095e-119	4.0071e-118
Hmx1	15371	5	663.397	-1.54421	0.0909267	-16.983	1.098e-64	1.0606e-63
Foxa3	15377	7	29.6943	0.967961	0.30487	3.175	0.00149836	0.00266842
Hnrnpc	15381	14	2031.52	-0.849824	0.0807107	-10.5293	6.33362e-26	3.00141e-25
Hnrnpa1	15382	15	1560.03	0.282124	0.0690248	4.08728	4.36468e-05	8.88655e-05
Hnrnpab	15384	11	3526.02	0.693034	0.072626	9.5425	1.3943e-21	5.87921e-21
Hnrnpk	15387	13	8249.33	-0.306095	0.0736943	-4.15358	3.27311e-05	6.73249e-05
Hnrnpl	15388	7	4795.25	-2.60926	0.0693399	-37.6299	0	0
Hoxa3	15400	6	179.892	-1.66577	0.150814	-11.0452	2.31268e-28	1.16981e-27
Hoxa4	15401	6	1194.8	-0.250801	0.0843376	-2.97377	0.00294164	0.00507278
Hoxa7	15404	6	22.895	1.10411	0.382908	2.88348	0.00393309	0.00667197
Hoxa9	15405	6	15.0157	1.41455	0.628563	2.25046	0.02442	0.0372826
Hoxb3	15410	11	37.2581	1.05412	0.394671	2.67088	0.00756537	0.012384
Hoxc9	15427	15	52.6173	1.25653	0.234295	5.36302	8.18405e-08	2.01185e-07
Hoxd3	15434	2	7.0069	2.2712	0.890189	2.55137	0.01073	0.0172207
Hoxd8	15437	2	1232.1	1.17367	0.0620114	18.9266	6.88431e-80	8.05208e-79
Hp1bp3	15441	4	529.197	-0.343539	0.121784	-2.8209	0.00478894	0.00803303
Hpse	15442	5	51.0642	-1.19111	0.250549	-4.75401	1.99422e-06	4.48306e-06
Hprt	15452	X	129.66	0.952056	0.146248	6.50986	7.52187e-11	2.15795e-10
Agfg1	15463	1	4386.76	0.335037	0.0616899	5.43098	5.60442e-08	1.3903e-07
Hrc	15464	7	5.4705	2.26158	0.800591	2.82489	0.00472963	0.00794109
Eif2ak1	15467	5	1171.22	-0.77768	0.0737014	-10.5518	4.98552e-26	2.36893e-25
Prmt2	15468	10	42.6561	-0.911696	0.293434	-3.10699	0.00189003	0.00333264
Prmt1	15469	7	479.78	-0.493357	0.123858	-3.98324	6.79827e-05	0.000136476
Hs3st1	15476	5	18.6666	-1.306	0.427401	-3.05567	0.00224556	0.00392655
Hspa8	15481	9	2737.13	-0.327858	0.0733699	-4.46856	7.87486e-06	1.70279e-05
Hspa1l	15482	17	5431.78	2.08084	0.0585476	35.5411	1.14172e-276	8.05509e-275
Hsd17b2	15486	8	25.035	1.10937	0.348966	3.17902	0.00147775	0.00263385
Hsd17b3	15487	13	25.4694	-2.6757	0.394867	-6.77621	1.23367e-11	3.66506e-11
[truncated: 9,647 more rows]
