# Supplementary material for: ARID1A governs the silencing of sex-linked transcription during male meiosis in the mouse
Source: eLife. 2024 Nov 26;12:RP88024. doi: 10.7554/eLife.88024 (PMC11594533; doi:10.7554/eLife.88024)
Supplement: Figure 4—source data 1. [file elife-88024-fig4-data1.xlsx]

## Sheet: Arid1aWT_ATACblfilt_overlap
Chromosome	Start	End	Name	Score	Strand	Signal Value	pValue (-log10)	qValue (-log10)
chr1	3042540	3043226	ATACpk_peak_1	116	.	5.44033	14.3002	11.646	436
chr1	3042530	3043234	ATACpk_peak_1	116	.	5.44033	14.3002	11.646	436
chr1	3042530	3043234	ATACpk_peak_1	116	.	5.44033	14.3002	11.646	436
chr1	3054406	3054806	ATACpk_peak_2	124	.	5.62792	15.1431	12.4635	261
chr1	3054361	3054882	ATACpk_peak_2	124	.	5.62792	15.1431	12.4635	261
chr1	3671725	3672114	ATACpk_peak_3	92	.	4.87753	11.8608	9.28651	211
chr1	3671725	3672114	ATACpk_peak_3	92	.	4.87753	11.8608	9.28651	211
chr1	3671906	3672114	ATACpk_peak_3	92	.	4.87753	11.8608	9.28651	211
chr1	4256546	4258680	ATACpk_peak_4	324	.	9.56747	35.5699	32.4211	930
chr1	4256478	4258680	ATACpk_peak_4	324	.	9.56747	35.5699	32.4211	930
chr1	4256606	4258680	ATACpk_peak_4	324	.	9.56747	35.5699	32.4211	930
chr1	4352300	4353014	ATACpk_peak_5	92	.	4.87753	11.8608	9.28651	219
chr1	4352300	4352761	ATACpk_peak_5	92	.	4.87753	11.8608	9.28651	219
chr1	4352300	4352823	ATACpk_peak_5	92	.	4.87753	11.8608	9.28651	219
chr1	4492191	4492768	ATACpk_peak_6	50	.	3.75195	7.43695	5.05349	163
chr1	4492191	4492768	ATACpk_peak_6	50	.	3.75195	7.43695	5.05349	163
chr1	4492191	4492595	ATACpk_peak_6	50	.	3.75195	7.43695	5.05349	163
chr1	4496695	4496756	ATACpk_peak_7	26	.	3.00156	4.89156	2.67543	362
chr1	4496568	4496756	ATACpk_peak_7	26	.	3.00156	4.89156	2.67543	362
chr1	4496566	4496756	ATACpk_peak_7	26	.	3.00156	4.89156	2.67543	362
chr1	4497029	4497327	ATACpk_peak_8	32	.	3.18916	5.49317	3.23067	87
chr1	4497029	4497327	ATACpk_peak_8	32	.	3.18916	5.49317	3.23067	87
chr1	4497029	4497327	ATACpk_peak_8	32	.	3.18916	5.49317	3.23067	87
chr1	4559882	4560850	ATACpk_peak_9	100	.	5.06513	12.6585	10.057	458
chr1	4559882	4560834	ATACpk_peak_9	100	.	5.06513	12.6585	10.057	458
chr1	4559882	4560850	ATACpk_peak_9	100	.	5.06513	12.6585	10.057	458
chr1	4785480	4785825	ATACpk_peak_10	100	.	5.06513	12.6585	10.057	172
chr1	4785470	4785825	ATACpk_peak_10	100	.	5.06513	12.6585	10.057	172
chr1	4785470	4785825	ATACpk_peak_10	100	.	5.06513	12.6585	10.057	172
chr1	4807593	4808164	ATACpk_peak_11	150	.	6.19072	17.7546	15.0004	191
chr1	4807695	4808135	ATACpk_peak_11	150	.	6.19072	17.7546	15.0004	191
chr1	4807650	4808164	ATACpk_peak_11	150	.	6.19072	17.7546	15.0004	191
chr1	4857489	4858248	ATACpk_peak_13	292	.	9.00468	32.3804	29.2928	333
chr1	4857489	4858248	ATACpk_peak_13	292	.	9.00468	32.3804	29.2928	333
chr1	4857489	4858248	ATACpk_peak_13	292	.	9.00468	32.3804	29.2928	333
chr1	5072170	5072792	ATACpk_peak_14	63	.	4.12714	8.83787	6.38376	385
chr1	5072154	5072792	ATACpk_peak_14	63	.	4.12714	8.83787	6.38376	385
chr1	5082805	5083582	ATACpk_peak_15	150	.	6.19072	17.7546	15.0004	493
chr1	5082838	5083582	ATACpk_peak_15	150	.	6.19072	17.7546	15.0004	493
chr1	5082805	5083582	ATACpk_peak_15	150	.	6.19072	17.7546	15.0004	493
chr1	5109881	5114236	ATACpk_peak_16	313	.	9.37987	34.4981	31.3698	2814
chr1	5109852	5114236	ATACpk_peak_16	313	.	9.37987	34.4981	31.3698	2814
chr1	5109852	5114236	ATACpk_peak_16	313	.	9.37987	34.4981	31.3698	2814
chr1	6214208	6215429	ATACpk_peak_18	324	.	9.56747	35.5699	32.4211	396
chr1	6214208	6215429	ATACpk_peak_18	324	.	9.56747	35.5699	32.4211	396
chr1	6214208	6215297	ATACpk_peak_18	324	.	9.56747	35.5699	32.4211	396
chr1	6382792	6383190	ATACpk_peak_19	124	.	5.62792	15.1431	12.4635	241
chr1	6382792	6383190	ATACpk_peak_19	124	.	5.62792	15.1431	12.4635	241
chr1	6382802	6383190	ATACpk_peak_19	124	.	5.62792	15.1431	12.4635	241
chr1	6441180	6442303	ATACpk_peak_20	85	.	4.68994	11.0793	8.53295	621
chr1	6440937	6442303	ATACpk_peak_20	85	.	4.68994	11.0793	8.53295	621
chr1	6441403	6441803	ATACpk_peak_20	85	.	4.68994	11.0793	8.53295	621
chr1	6664019	6664422	ATACpk_peak_21	63	.	4.12714	8.83787	6.38376	557
chr1	7088625	7089223	ATACpk_peak_22	262	.	8.44189	29.2712	26.2456	359
chr1	7088571	7089174	ATACpk_peak_22	262	.	8.44189	29.2712	26.2456	359
chr1	7088522	7089135	ATACpk_peak_22	262	.	8.44189	29.2712	26.2456	359
chr1	7334981	7335231	ATACpk_peak_23	32	.	3.18916	5.49317	3.23067	207
chr1	7334981	7335472	ATACpk_peak_23	32	.	3.18916	5.49317	3.23067	207
chr1	7388409	7388770	ATACpk_peak_25	21	.	2.81396	4.31522	2.14996	322
chr1	7397189	7398735	ATACpk_peak_26	562	.	13.507	59.81	56.2679	902
chr1	7397189	7398804	ATACpk_peak_26	562	.	13.507	59.81	56.2679	902
chr1	7397656	7398657	ATACpk_peak_26	562	.	13.507	59.81	56.2679	902
chr1	9544930	9546234	ATACpk_peak_29	802	.	17.0714	84.0653	80.2312	944
chr1	9545036	9546234	ATACpk_peak_29	802	.	17.0714	84.0653	80.2312	944
chr1	9545055	9546234	ATACpk_peak_29	802	.	17.0714	84.0653	80.2312	944
chr1	9699599	9701108	ATACpk_peak_30	686	.	15.383	72.3379	68.6356	1040
chr1	9699599	9701297	ATACpk_peak_30	686	.	15.383	72.3379	68.6356	1040
chr1	9699631	9701168	ATACpk_peak_30	686	.	15.383	72.3379	68.6356	1040
chr1	9747474	9748754	ATACpk_peak_31	514	.	12.7566	54.9621	51.4896	961
chr1	9747474	9748754	ATACpk_peak_31	514	.	12.7566	54.9621	51.4896	961
chr1	9747474	9748754	ATACpk_peak_31	514	.	12.7566	54.9621	51.4896	961
chr1	9768117	9769090	ATACpk_peak_32	57	.	3.93955	8.12754	5.70762	1037
chr1	9768013	9769137	ATACpk_peak_32	57	.	3.93955	8.12754	5.70762	1037
chr1	9768740	9769137	ATACpk_peak_32	57	.	3.93955	8.12754	5.70762	1037
chr1	9848087	9848688	ATACpk_peak_33	204	.	7.3163	23.3155	20.4228	367
chr1	9848087	9848795	ATACpk_peak_33	204	.	7.3163	23.3155	20.4228	367
chr1	9848087	9848679	ATACpk_peak_33	204	.	7.3163	23.3155	20.4228	367
chr1	9907939	9909450	ATACpk_peak_35	252	.	8.25429	28.2535	25.2493	762
chr1	9907939	9909415	ATACpk_peak_35	252	.	8.25429	28.2535	25.2493	762
chr1	9908558	9909232	ATACpk_peak_35	252	.	8.25429	28.2535	25.2493	762
chr1	9943795	9944628	ATACpk_peak_36	491	.	12.3814	52.5757	49.1389	344
chr1	9943795	9944783	ATACpk_peak_36	491	.	12.3814	52.5757	49.1389	344
chr1	9943795	9944556	ATACpk_peak_36	491	.	12.3814	52.5757	49.1389	344
chr1	9967167	9968274	ATACpk_peak_37	252	.	8.25429	28.2535	25.2493	601
chr1	9967167	9968265	ATACpk_peak_37	252	.	8.25429	28.2535	25.2493	601
chr1	9967167	9968258	ATACpk_peak_37	252	.	8.25429	28.2535	25.2493	601
chr1	10008906	10009409	ATACpk_peak_38	77	.	4.50234	10.3145	7.79751	237
chr1	10008819	10009409	ATACpk_peak_38	77	.	4.50234	10.3145	7.79751	237
chr1	10008948	10009409	ATACpk_peak_38	77	.	4.50234	10.3145	7.79751	237
chr1	10037494	10040456	ATACpk_peak_39	514	.	12.7566	54.9621	51.4896	2531
chr1	10037527	10040456	ATACpk_peak_39	514	.	12.7566	54.9621	51.4896	2531
chr1	10037522	10038719	ATACpk_peak_39	514	.	12.7566	54.9621	51.4896	2531
chr1	10038969	10040302	ATACpk_peak_39	514	.	12.7566	54.9621	51.4896	2531
chr1	10100615	10101859	ATACpk_peak_40	262	.	8.44189	29.2712	26.2456	615
chr1	10100615	10101719	ATACpk_peak_40	262	.	8.44189	29.2712	26.2456	615
chr1	10100635	10101691	ATACpk_peak_40	262	.	8.44189	29.2712	26.2456	615
chr1	10231915	10233267	ATACpk_peak_41	252	.	8.25429	28.2535	25.2493	1170
chr1	10231915	10233267	ATACpk_peak_41	252	.	8.25429	28.2535	25.2493	1170
chr1	10232139	10233267	ATACpk_peak_41	252	.	8.25429	28.2535	25.2493	1170
chr1	10478443	10479816	ATACpk_peak_42	124	.	5.62792	15.1431	12.4635	871
chr1	10478414	10479921	ATACpk_peak_42	124	.	5.62792	15.1431	12.4635	871
chr1	10478492	10479729	ATACpk_peak_42	124	.	5.62792	15.1431	12.4635	871
chr1	10695480	10695656	ATACpk_peak_43	26	.	3.00156	4.89156	2.67543	101
chr1	10695480	10695575	ATACpk_peak_43	26	.	3.00156	4.89156	2.67543	101
chr1	11328851	11329709	ATACpk_peak_44	92	.	4.87753	11.8608	9.28651	844
chr1	11328740	11329693	ATACpk_peak_44	92	.	4.87753	11.8608	9.28651	844
chr1	11328896	11329802	ATACpk_peak_44	92	.	4.87753	11.8608	9.28651	844
chr1	11783113	11783455	ATACpk_peak_45	21	.	2.81396	4.31522	2.14996	4
chr1	12657471	12657804	ATACpk_peak_46	176	.	6.75351	20.4818	17.6567	180
chr1	12657471	12657826	ATACpk_peak_46	176	.	6.75351	20.4818	17.6567	180
chr1	12657471	12657782	ATACpk_peak_46	176	.	6.75351	20.4818	17.6567	180
chr1	12692628	12692928	ATACpk_peak_47	21	.	2.81396	4.31522	2.14996	92
chr1	12851150	12851443	ATACpk_peak_48	32	.	3.18916	5.49317	3.23067	190
chr1	12851402	12851443	ATACpk_peak_48	32	.	3.18916	5.49317	3.23067	190
chr1	13069222	13070222	ATACpk_peak_49	141	.	6.00312	16.8707	14.1409	725
chr1	13069619	13070222	ATACpk_peak_49	141	.	6.00312	16.8707	14.1409	725
chr1	13069091	13069208	ATACpk_peak_49	141	.	6.00312	16.8707	14.1409	725
chr1	13069585	13070079	ATACpk_peak_49	141	.	6.00312	16.8707	14.1409	725
chr1	13337868	13338966	ATACpk_peak_50	167	.	6.56591	19.5605	16.7585	681
chr1	13337741	13338784	ATACpk_peak_50	167	.	6.56591	19.5605	16.7585	681
chr1	13337807	13339027	ATACpk_peak_50	167	.	6.56591	19.5605	16.7585	681
chr1	13372284	13374614	ATACpk_peak_51	599	.	14.0698	63.5091	59.9166	360
chr1	13372211	13374647	ATACpk_peak_51	599	.	14.0698	63.5091	59.9166	360
chr1	13372211	13374634	ATACpk_peak_51	599	.	14.0698	63.5091	59.9166	360
chr1	13589252	13590539	ATACpk_peak_52	292	.	9.00468	32.3804	29.2928	910
chr1	13589114	13590412	ATACpk_peak_52	292	.	9.00468	32.3804	29.2928	910
chr1	13589095	13590212	ATACpk_peak_52	292	.	9.00468	32.3804	29.2928	910
chr1	13660219	13660660	ATACpk_peak_53	92	.	4.87753	11.8608	9.28651	238
chr1	13660219	13660697	ATACpk_peak_53	92	.	4.87753	11.8608	9.28651	238
chr1	13660219	13660616	ATACpk_peak_53	92	.	4.87753	11.8608	9.28651	238
chr1	14755358	14755692	ATACpk_peak_54	32	.	3.18916	5.49317	3.23067	135
chr1	14755358	14755682	ATACpk_peak_54	32	.	3.18916	5.49317	3.23067	135
chr1	14755375	14755692	ATACpk_peak_54	32	.	3.18916	5.49317	3.23067	135
chr1	15743025	15743304	ATACpk_peak_56	38	.	3.37675	6.11872	3.81342	137
chr1	15794395	15794669	ATACpk_peak_57	26	.	3.00156	4.89156	2.67543	89
chr1	15794455	15794718	ATACpk_peak_57	26	.	3.00156	4.89156	2.67543	89
chr1	15794395	15794689	ATACpk_peak_57	26	.	3.00156	4.89156	2.67543	89
chr1	15805295	15806321	ATACpk_peak_58	433	.	11.4434	46.7256	43.3798	453
chr1	15805194	15806239	ATACpk_peak_58	433	.	11.4434	46.7256	43.3798	453
chr1	15805293	15806200	ATACpk_peak_58	433	.	11.4434	46.7256	43.3798	453
chr1	16025771	16026061	ATACpk_peak_59	26	.	3.00156	4.89156	2.67543	268
chr1	16026537	16026736	ATACpk_peak_60	57	.	3.93955	8.12754	5.70762	170
chr1	16026366	16026736	ATACpk_peak_60	57	.	3.93955	8.12754	5.70762	170
chr1	16026366	16026736	ATACpk_peak_60	57	.	3.93955	8.12754	5.70762	170
chr1	16070851	16074630	ATACpk_peak_61	334	.	9.75507	36.6501	33.4809	1839
chr1	16070851	16074630	ATACpk_peak_61	334	.	9.75507	36.6501	33.4809	1839
chr1	16070851	16074630	ATACpk_peak_61	334	.	9.75507	36.6501	33.4809	1839
chr1	16087153	16087552	ATACpk_peak_62	57	.	3.93955	8.12754	5.70762	245
chr1	16087153	16087552	ATACpk_peak_62	57	.	3.93955	8.12754	5.70762	245
chr1	16092832	16093915	ATACpk_peak_63	303	.	9.19228	33.4349	30.3268	491
chr1	16092844	16093984	ATACpk_peak_63	303	.	9.19228	33.4349	30.3268	491
chr1	16092844	16093825	ATACpk_peak_63	303	.	9.19228	33.4349	30.3268	491
chr1	16104165	16106109	ATACpk_peak_64	223	.	7.6915	25.2597	22.3218	783
chr1	16104165	16106109	ATACpk_peak_64	223	.	7.6915	25.2597	22.3218	783
chr1	16104370	16105740	ATACpk_peak_64	223	.	7.6915	25.2597	22.3218	783
chr1	16618631	16619630	ATACpk_peak_65	185	.	6.94111	21.415	18.5672	640
chr1	16618631	16619490	ATACpk_peak_65	185	.	6.94111	21.415	18.5672	640
chr1	16618701	16619620	ATACpk_peak_65	185	.	6.94111	21.415	18.5672	640
chr1	16656494	16657479	ATACpk_peak_66	292	.	9.00468	32.3804	29.2928	462
chr1	16656546	16657401	ATACpk_peak_66	292	.	9.00468	32.3804	29.2928	462
chr1	16656568	16657503	ATACpk_peak_66	292	.	9.00468	32.3804	29.2928	462
chr1	16665114	16665630	ATACpk_peak_67	85	.	4.68994	11.0793	8.53295	210
chr1	16665007	16665600	ATACpk_peak_67	85	.	4.68994	11.0793	8.53295	210
chr1	16665116	16665719	ATACpk_peak_67	85	.	4.68994	11.0793	8.53295	210
chr1	16688408	16688784	ATACpk_peak_68	44	.	3.56435	6.76701	4.42147	288
chr1	17096926	17098083	ATACpk_peak_69	185	.	6.94111	21.415	18.5672	526
chr1	17097003	17098083	ATACpk_peak_69	185	.	6.94111	21.415	18.5672	526
chr1	17097013	17098083	ATACpk_peak_69	185	.	6.94111	21.415	18.5672	526
chr1	17122980	17123725	ATACpk_peak_70	38	.	3.37675	6.11872	3.81342	329
chr1	17123000	17123725	ATACpk_peak_70	38	.	3.37675	6.11872	3.81342	329
chr1	18058011	18058464	ATACpk_peak_71	38	.	3.37675	6.11872	3.81342	339
chr1	18058011	18058464	ATACpk_peak_71	38	.	3.37675	6.11872	3.81342	339
chr1	18078301	18079061	ATACpk_peak_72	63	.	4.12714	8.83787	6.38376	524
chr1	18278270	18278949	ATACpk_peak_74	32	.	3.18916	5.49317	3.23067	336
chr1	18478756	18479274	ATACpk_peak_75	38	.	3.37675	6.11872	3.81342	975
chr1	18478970	18479532	ATACpk_peak_75	38	.	3.37675	6.11872	3.81342	975
chr1	18537340	18538388	ATACpk_peak_76	116	.	5.44033	14.3002	11.646	603
chr1	18537340	18538443	ATACpk_peak_76	116	.	5.44033	14.3002	11.646	603
chr1	18537340	18538443	ATACpk_peak_76	116	.	5.44033	14.3002	11.646	603
chr1	20432762	20433054	ATACpk_peak_79	100	.	5.06513	12.6585	10.057	316
chr1	20432521	20433266	ATACpk_peak_79	100	.	5.06513	12.6585	10.057	316
chr1	20432521	20433125	ATACpk_peak_79	100	.	5.06513	12.6585	10.057	316
chr1	20486834	20487327	ATACpk_peak_80	26	.	3.00156	4.89156	2.67543	184
chr1	20486730	20487234	ATACpk_peak_80	26	.	3.00156	4.89156	2.67543	184
chr1	20819949	20820514	ATACpk_peak_81	378	.	10.5055	41.0519	37.8028	374
chr1	20819949	20820514	ATACpk_peak_81	378	.	10.5055	41.0519	37.8028	374
chr1	20819949	20820514	ATACpk_peak_81	378	.	10.5055	41.0519	37.8028	374
chr1	20868356	20868922	ATACpk_peak_82	44	.	3.56435	6.76701	4.42147	76
chr1	20868356	20868922	ATACpk_peak_82	44	.	3.56435	6.76701	4.42147	76
chr1	20868428	20868922	ATACpk_peak_82	44	.	3.56435	6.76701	4.42147	76
chr1	20917558	20917885	ATACpk_peak_83	70	.	4.31474	9.56711	7.0808	267
chr1	20917558	20917897	ATACpk_peak_83	70	.	4.31474	9.56711	7.0808	267
chr1	20934721	20934962	ATACpk_peak_84	32	.	3.18916	5.49317	3.23067	69
chr1	20934656	20934962	ATACpk_peak_84	32	.	3.18916	5.49317	3.23067	69
chr1	20951047	20952088	ATACpk_peak_85	292	.	9.00468	32.3804	29.2928	612
chr1	20951039	20952088	ATACpk_peak_85	292	.	9.00468	32.3804	29.2928	612
chr1	20951075	20952088	ATACpk_peak_85	292	.	9.00468	32.3804	29.2928	612
chr1	21078822	21079830	ATACpk_peak_86	367	.	10.3179	39.9396	36.7101	703
chr1	21078703	21079844	ATACpk_peak_86	367	.	10.3179	39.9396	36.7101	703
chr1	21078703	21079844	ATACpk_peak_86	367	.	10.3179	39.9396	36.7101	703
chr1	21218477	21218846	ATACpk_peak_87	57	.	3.93955	8.12754	5.70762	187
chr1	21218477	21218962	ATACpk_peak_87	57	.	3.93955	8.12754	5.70762	187
chr1	22154576	22155113	ATACpk_peak_88	63	.	4.12714	8.83787	6.38376	678
chr1	23101705	23102344	ATACpk_peak_89	141	.	6.00312	16.8707	14.1409	551
chr1	23101705	23102344	ATACpk_peak_89	141	.	6.00312	16.8707	14.1409	551
chr1	23101856	23102321	ATACpk_peak_89	141	.	6.00312	16.8707	14.1409	551
chr1	23255735	23256944	ATACpk_peak_90	538	.	13.1318	57.3737	53.8659	582
chr1	23255735	23256944	ATACpk_peak_90	538	.	13.1318	57.3737	53.8659	582
chr1	23255969	23256932	ATACpk_peak_90	538	.	13.1318	57.3737	53.8659	582
chr1	23556311	23557055	ATACpk_peak_92	141	.	6.00312	16.8707	14.1409	494
chr1	23556232	23557025	ATACpk_peak_92	141	.	6.00312	16.8707	14.1409	494
chr1	23556526	23557016	ATACpk_peak_92	141	.	6.00312	16.8707	14.1409	494
chr1	23762981	23763379	ATACpk_peak_93	32	.	3.18916	5.49317	3.23067	37
chr1	23921647	23922421	ATACpk_peak_94	77	.	4.50234	10.3145	7.79751	226
chr1	23921573	23922421	ATACpk_peak_94	77	.	4.50234	10.3145	7.79751	226
chr1	23921673	23922421	ATACpk_peak_94	77	.	4.50234	10.3145	7.79751	226
chr1	24005393	24006266	ATACpk_peak_95	223	.	7.6915	25.2597	22.3218	265
chr1	24005393	24006266	ATACpk_peak_95	223	.	7.6915	25.2597	22.3218	265
chr1	24005393	24006242	ATACpk_peak_95	223	.	7.6915	25.2597	22.3218	265
chr1	24045391	24045743	ATACpk_peak_96	32	.	3.18916	5.49317	3.23067	65
chr1	24045362	24045743	ATACpk_peak_96	32	.	3.18916	5.49317	3.23067	65
chr1	24099691	24101408	ATACpk_peak_97	776	.	16.6962	81.4246	77.6181	620
chr1	24099691	24101452	ATACpk_peak_97	776	.	16.6962	81.4246	77.6181	620
chr1	24099691	24101011	ATACpk_peak_97	776	.	16.6962	81.4246	77.6181	620
chr1	24678273	24679606	ATACpk_peak_99	562	.	13.507	59.81	56.2679	427
chr1	24678273	24679648	ATACpk_peak_99	562	.	13.507	59.81	56.2679	427
chr1	24678303	24679648	ATACpk_peak_99	562	.	13.507	59.81	56.2679	427
chr1	25662139	25663039	ATACpk_peak_100	70	.	4.31474	9.56711	7.0808	706
chr1	25662552	25662935	ATACpk_peak_100	70	.	4.31474	9.56711	7.0808	706
chr1	26616703	26616921	ATACpk_peak_102	38	.	3.37675	6.11872	3.81342	44
chr1	28288082	28288796	ATACpk_peak_104	63	.	4.12714	8.83787	6.38376	256
chr1	28288328	28288643	ATACpk_peak_104	63	.	4.12714	8.83787	6.38376	256
chr1	28288159	28288688	ATACpk_peak_104	63	.	4.12714	8.83787	6.38376	256
chr1	30042140	30043073	ATACpk_peak_105	85	.	4.68994	11.0793	8.53295	647
chr1	30042509	30043025	ATACpk_peak_105	85	.	4.68994	11.0793	8.53295	647
chr1	30310700	30311040	ATACpk_peak_106	38	.	3.37675	6.11872	3.81342	163
chr1	30310648	30310960	ATACpk_peak_106	38	.	3.37675	6.11872	3.81342	163
chr1	30371147	30371492	ATACpk_peak_107	63	.	4.12714	8.83787	6.38376	248
chr1	30370981	30371632	ATACpk_peak_107	63	.	4.12714	8.83787	6.38376	248
chr1	30873173	30874236	ATACpk_peak_108	292	.	9.00468	32.3804	29.2928	324
chr1	30873173	30874236	ATACpk_peak_108	292	.	9.00468	32.3804	29.2928	324
chr1	30873185	30874226	ATACpk_peak_108	292	.	9.00468	32.3804	29.2928	324
chr1	30949058	30950313	ATACpk_peak_109	868	.	18.0094	90.749	86.847	770
chr1	30949017	30950313	ATACpk_peak_109	868	.	18.0094	90.749	86.847	770
chr1	30949017	30950313	ATACpk_peak_109	868	.	18.0094	90.749	86.847	770
chr1	31075230	31075668	ATACpk_peak_110	57	.	3.93955	8.12754	5.70762	290
chr1	31075235	31076020	ATACpk_peak_110	57	.	3.93955	8.12754	5.70762	290
chr1	31150479	31150985	ATACpk_peak_111	44	.	3.56435	6.76701	4.42147	229
chr1	31150758	31150985	ATACpk_peak_111	44	.	3.56435	6.76701	4.42147	229
chr1	31222467	31223046	ATACpk_peak_112	141	.	6.00312	16.8707	14.1409	266
chr1	31222467	31223196	ATACpk_peak_112	141	.	6.00312	16.8707	14.1409	266
chr1	31222467	31223196	ATACpk_peak_112	141	.	6.00312	16.8707	14.1409	266
chr1	31958374	31959335	ATACpk_peak_113	108	.	5.25273	13.4718	10.8435	921
chr1	31959722	31960284	ATACpk_peak_113	108	.	5.25273	13.4718	10.8435	921
chr1	31958590	31960338	ATACpk_peak_113	108	.	5.25273	13.4718	10.8435	921
chr1	31958523	31960338	ATACpk_peak_113	108	.	5.25273	13.4718	10.8435	921
chr1	31961124	31962908	ATACpk_peak_114	141	.	6.00312	16.8707	14.1409	1735
chr1	31961022	31963912	ATACpk_peak_114	141	.	6.00312	16.8707	14.1409	1735
chr1	31961022	31961619	ATACpk_peak_114	141	.	6.00312	16.8707	14.1409	1735
chr1	31962417	31962767	ATACpk_peak_114	141	.	6.00312	16.8707	14.1409	1735
chr1	31963893	31964637	ATACpk_peak_114	141	.	6.00312	16.8707	14.1409	1735
chr1	32073359	32074232	ATACpk_peak_115	92	.	4.87753	11.8608	9.28651	442
chr1	32073439	32074232	ATACpk_peak_115	92	.	4.87753	11.8608	9.28651	442
chr1	32073365	32074266	ATACpk_peak_115	92	.	4.87753	11.8608	9.28651	442
chr1	32172559	32172966	ATACpk_peak_116	158	.	6.37831	18.6513	15.8732	123
chr1	32172559	32172966	ATACpk_peak_116	158	.	6.37831	18.6513	15.8732	123
chr1	32172559	32172816	ATACpk_peak_116	158	.	6.37831	18.6513	15.8732	123
chr1	32636251	32636560	ATACpk_peak_117	57	.	3.93955	8.12754	5.70762	75
chr1	33407798	33408646	ATACpk_peak_118	77	.	4.50234	10.3145	7.79751	451
chr1	33407657	33408707	ATACpk_peak_118	77	.	4.50234	10.3145	7.79751	451
chr1	33407657	33408622	ATACpk_peak_118	77	.	4.50234	10.3145	7.79751	451
chr1	33567589	33570796	ATACpk_peak_119	292	.	9.00468	32.3804	29.2928	1024
chr1	33567589	33570796	ATACpk_peak_119	292	.	9.00468	32.3804	29.2928	1024
chr1	33567589	33570796	ATACpk_peak_119	292	.	9.00468	32.3804	29.2928	1024
chr1	33617011	33617316	ATACpk_peak_120	44	.	3.56435	6.76701	4.42147	38
chr1	33617011	33617251	ATACpk_peak_120	44	.	3.56435	6.76701	4.42147	38
chr1	33669566	33670500	ATACpk_peak_121	213	.	7.5039	24.2823	21.367	317
chr1	33669557	33670500	ATACpk_peak_121	213	.	7.5039	24.2823	21.367	317
chr1	33669549	33670496	ATACpk_peak_121	213	.	7.5039	24.2823	21.367	317
chr1	33719787	33720445	ATACpk_peak_122	367	.	10.3179	39.9396	36.7101	386
chr1	33719787	33720528	ATACpk_peak_122	367	.	10.3179	39.9396	36.7101	386
chr1	33719787	33720754	ATACpk_peak_122	367	.	10.3179	39.9396	36.7101	386
chr1	33757336	33757993	ATACpk_peak_123	176	.	6.75351	20.4818	17.6567	296
chr1	33757457	33757993	ATACpk_peak_123	176	.	6.75351	20.4818	17.6567	296
chr1	33757432	33757993	ATACpk_peak_123	176	.	6.75351	20.4818	17.6567	296
chr1	33813992	33814670	ATACpk_peak_124	194	.	7.1287	22.3596	19.4893	523
chr1	33813992	33814670	ATACpk_peak_124	194	.	7.1287	22.3596	19.4893	523
chr1	33814093	33814667	ATACpk_peak_124	194	.	7.1287	22.3596	19.4893	523
chr1	33828968	33829358	ATACpk_peak_125	38	.	3.37675	6.11872	3.81342	764
chr1	33838320	33839210	ATACpk_peak_126	77	.	4.50234	10.3145	7.79751	790
chr1	33838603	33839207	ATACpk_peak_126	77	.	4.50234	10.3145	7.79751	790
chr1	33838320	33839182	ATACpk_peak_126	77	.	4.50234	10.3145	7.79751	790
chr1	33903140	33903781	ATACpk_peak_127	108	.	5.25273	13.4718	10.8435	765
chr1	33902961	33903781	ATACpk_peak_127	108	.	5.25273	13.4718	10.8435	765
chr1	33944827	33945485	ATACpk_peak_128	50	.	3.75195	7.43695	5.05349	329
chr1	33944827	33945485	ATACpk_peak_128	50	.	3.75195	7.43695	5.05349	329
chr1	33945103	33945485	ATACpk_peak_128	50	.	3.75195	7.43695	5.05349	329
chr1	34215118	34215829	ATACpk_peak_129	38	.	3.37675	6.11872	3.81342	150
chr1	34230436	34230727	ATACpk_peak_130	38	.	3.37675	6.11872	3.81342	84
chr1	34438989	34440215	ATACpk_peak_131	1004	.	19.8853	104.448	100.424	716
chr1	34438989	34440205	ATACpk_peak_131	1004	.	19.8853	104.448	100.424	716
chr1	34438989	34440197	ATACpk_peak_131	1004	.	19.8853	104.448	100.424	716
chr1	34459074	34459705	ATACpk_peak_132	77	.	4.50234	10.3145	7.79751	879
chr1	34459263	34459705	ATACpk_peak_132	77	.	4.50234	10.3145	7.79751	879
chr1	34459609	34459705	ATACpk_peak_132	77	.	4.50234	10.3145	7.79751	879
chr1	34485280	34485750	ATACpk_peak_133	38	.	3.37675	6.11872	3.81342	836
chr1	34498231	34499304	ATACpk_peak_134	77	.	4.50234	10.3145	7.79751	852
chr1	34498024	34499498	ATACpk_peak_134	77	.	4.50234	10.3145	7.79751	852
chr1	34498278	34499569	ATACpk_peak_134	77	.	4.50234	10.3145	7.79751	852
chr1	34501274	34501302	ATACpk_peak_135	26	.	3.00156	4.89156	2.67543	200
chr1	34510439	34511208	ATACpk_peak_137	57	.	3.93955	8.12754	5.70762	311
chr1	34510424	34511208	ATACpk_peak_137	57	.	3.93955	8.12754	5.70762	311
chr1	34510495	34511208	ATACpk_peak_137	57	.	3.93955	8.12754	5.70762	311
chr1	34578715	34579788	ATACpk_peak_138	100	.	5.06513	12.6585	10.057	1140
chr1	34578692	34579788	ATACpk_peak_138	100	.	5.06513	12.6585	10.057	1140
chr1	34578744	34579788	ATACpk_peak_138	100	.	5.06513	12.6585	10.057	1140
chr1	34801736	34802149	ATACpk_peak_140	141	.	6.00312	16.8707	14.1409	192
chr1	34801836	34802149	ATACpk_peak_140	141	.	6.00312	16.8707	14.1409	192
chr1	34801810	34802149	ATACpk_peak_140	141	.	6.00312	16.8707	14.1409	192
chr1	34842546	34843117	ATACpk_peak_141	100	.	5.06513	12.6585	10.057	462
chr1	34842531	34843117	ATACpk_peak_141	100	.	5.06513	12.6585	10.057	462
chr1	34842520	34843011	ATACpk_peak_141	100	.	5.06513	12.6585	10.057	462
chr1	34849871	34850718	ATACpk_peak_142	132	.	5.81552	16	13.295	327
chr1	34849881	34850718	ATACpk_peak_142	132	.	5.81552	16	13.295	327
chr1	34849873	34850578	ATACpk_peak_142	132	.	5.81552	16	13.295	327
chr1	35214496	35215074	ATACpk_peak_143	44	.	3.56435	6.76701	4.42147	492
chr1	35214496	35215074	ATACpk_peak_143	44	.	3.56435	6.76701	4.42147	492
chr1	35214496	35214973	ATACpk_peak_143	44	.	3.56435	6.76701	4.42147	492
chr1	35869734	35870012	ATACpk_peak_145	70	.	4.31474	9.56711	7.0808	206
chr1	36068028	36068462	ATACpk_peak_146	176	.	6.75351	20.4818	17.6567	230
chr1	36068028	36068462	ATACpk_peak_146	176	.	6.75351	20.4818	17.6567	230
chr1	36068028	36068462	ATACpk_peak_146	176	.	6.75351	20.4818	17.6567	230
chr1	36243868	36244427	ATACpk_peak_147	150	.	6.19072	17.7546	15.0004	414
chr1	36243876	36244427	ATACpk_peak_147	150	.	6.19072	17.7546	15.0004	414
chr1	36243893	36244427	ATACpk_peak_147	150	.	6.19072	17.7546	15.0004	414
chr1	36252777	36253221	ATACpk_peak_148	57	.	3.93955	8.12754	5.70762	278
chr1	36252777	36253213	ATACpk_peak_148	57	.	3.93955	8.12754	5.70762	278
chr1	36269422	36269710	ATACpk_peak_149	70	.	4.31474	9.56711	7.0808	163
chr1	36269444	36269710	ATACpk_peak_149	70	.	4.31474	9.56711	7.0808	163
chr1	36269423	36269710	ATACpk_peak_149	70	.	4.31474	9.56711	7.0808	163
chr1	36287474	36287856	ATACpk_peak_151	116	.	5.44033	14.3002	11.646	342
chr1	36287601	36287878	ATACpk_peak_151	116	.	5.44033	14.3002	11.646	342
chr1	36307344	36308715	ATACpk_peak_152	313	.	9.37987	34.4981	31.3698	384
chr1	36307344	36308180	ATACpk_peak_152	313	.	9.37987	34.4981	31.3698	384
chr1	36308556	36308715	ATACpk_peak_152	313	.	9.37987	34.4981	31.3698	384
chr1	36307406	36308133	ATACpk_peak_152	313	.	9.37987	34.4981	31.3698	384
chr1	36315044	36315402	ATACpk_peak_154	70	.	4.31474	9.56711	7.0808	138
chr1	36315044	36315402	ATACpk_peak_154	70	.	4.31474	9.56711	7.0808	138
chr1	36315044	36315402	ATACpk_peak_154	70	.	4.31474	9.56711	7.0808	138
chr1	36368545	36369370	ATACpk_peak_155	303	.	9.19228	33.4349	30.3268	516
chr1	36368545	36369370	ATACpk_peak_155	303	.	9.19228	33.4349	30.3268	516
chr1	36368545	36369370	ATACpk_peak_155	303	.	9.19228	33.4349	30.3268	516
chr1	36444593	36445655	ATACpk_peak_156	648	.	14.8202	68.5212	64.8654	688
chr1	36444613	36445655	ATACpk_peak_156	648	.	14.8202	68.5212	64.8654	688
chr1	36444708	36445505	ATACpk_peak_156	648	.	14.8202	68.5212	64.8654	688
chr1	36471207	36472469	ATACpk_peak_157	356	.	10.1303	38.8351	35.6252	350
chr1	36471121	36472383	ATACpk_peak_157	356	.	10.1303	38.8351	35.6252	350
chr1	36471111	36472292	ATACpk_peak_157	356	.	10.1303	38.8351	35.6252	350
chr1	36511325	36512920	ATACpk_peak_158	648	.	14.8202	68.5212	64.8654	552
chr1	36511364	36512920	ATACpk_peak_158	648	.	14.8202	68.5212	64.8654	552
chr1	36511494	36512920	ATACpk_peak_158	648	.	14.8202	68.5212	64.8654	552
chr1	36531232	36532169	ATACpk_peak_159	50	.	3.75195	7.43695	5.05349	393
chr1	36546365	36547808	ATACpk_peak_161	456	.	11.8186	49.0453	45.6633	1246
chr1	36546071	36547816	ATACpk_peak_161	456	.	11.8186	49.0453	45.6633	1246
chr1	36546558	36547816	ATACpk_peak_161	456	.	11.8186	49.0453	45.6633	1246
chr1	36556614	36559440	ATACpk_peak_162	124	.	5.62792	15.1431	12.4635	1417
chr1	36556614	36559440	ATACpk_peak_162	124	.	5.62792	15.1431	12.4635	1417
chr1	36556614	36558896	ATACpk_peak_162	124	.	5.62792	15.1431	12.4635	1417
chr1	36559749	36560125	ATACpk_peak_163	57	.	3.93955	8.12754	5.70762	165
chr1	36559876	36560158	ATACpk_peak_163	57	.	3.93955	8.12754	5.70762	165
chr1	36586906	36587401	ATACpk_peak_164	26	.	3.00156	4.89156	2.67543	520
chr1	36588013	36588514	ATACpk_peak_165	26	.	3.00156	4.89156	2.67543	273
chr1	36588364	36588514	ATACpk_peak_165	26	.	3.00156	4.89156	2.67543	273
chr1	36588193	36588514	ATACpk_peak_165	26	.	3.00156	4.89156	2.67543	273
chr1	36589651	36592172	ATACpk_peak_166	57	.	3.93955	8.12754	5.70762	438
chr1	36589651	36591401	ATACpk_peak_166	57	.	3.93955	8.12754	5.70762	438
chr1	36589651	36592172	ATACpk_peak_166	57	.	3.93955	8.12754	5.70762	438
chr1	36592727	36593446	ATACpk_peak_167	70	.	4.31474	9.56711	7.0808	473
chr1	36592727	36593436	ATACpk_peak_167	70	.	4.31474	9.56711	7.0808	473
chr1	36610554	36611107	ATACpk_peak_168	63	.	4.12714	8.83787	6.38376	440
chr1	36610554	36611107	ATACpk_peak_168	63	.	4.12714	8.83787	6.38376	440
chr1	36610700	36611107	ATACpk_peak_168	63	.	4.12714	8.83787	6.38376	440
chr1	36619530	36619854	ATACpk_peak_169	57	.	3.93955	8.12754	5.70762	220
chr1	36619530	36619854	ATACpk_peak_169	57	.	3.93955	8.12754	5.70762	220
chr1	36619530	36619854	ATACpk_peak_169	57	.	3.93955	8.12754	5.70762	220
chr1	36630636	36630845	ATACpk_peak_170	21	.	2.81396	4.31522	2.14996	218
chr1	36630568	36630845	ATACpk_peak_170	21	.	2.81396	4.31522	2.14996	218
chr1	36679577	36679965	ATACpk_peak_172	38	.	3.37675	6.11872	3.81342	226
chr1	36682706	36683305	ATACpk_peak_173	70	.	4.31474	9.56711	7.0808	417
chr1	36682706	36683305	ATACpk_peak_173	70	.	4.31474	9.56711	7.0808	417
chr1	36682706	36683305	ATACpk_peak_173	70	.	4.31474	9.56711	7.0808	417
chr1	36690992	36691913	ATACpk_peak_174	356	.	10.1303	38.8351	35.6252	495
chr1	36691158	36691913	ATACpk_peak_174	356	.	10.1303	38.8351	35.6252	495
chr1	36690992	36691752	ATACpk_peak_174	356	.	10.1303	38.8351	35.6252	495
chr1	36709585	36710165	ATACpk_peak_175	550	.	13.3194	58.5888	55.0638	394
chr1	36709585	36710165	ATACpk_peak_175	550	.	13.3194	58.5888	55.0638	394
chr1	36709585	36710165	ATACpk_peak_175	550	.	13.3194	58.5888	55.0638	394
chr1	36939045	36940223	ATACpk_peak_176	503	.	12.569	53.7657	50.3112	621
chr1	36939045	36940223	ATACpk_peak_176	503	.	12.569	53.7657	50.3112	621
chr1	36939045	36940121	ATACpk_peak_176	503	.	12.569	53.7657	50.3112	621
chr1	37028616	37029910	ATACpk_peak_177	272	.	8.62948	30.2984	27.2518	675
chr1	37028616	37029910	ATACpk_peak_177	272	.	8.62948	30.2984	27.2518	675
chr1	37028668	37029910	ATACpk_peak_177	272	.	8.62948	30.2984	27.2518	675
chr1	37075688	37076031	ATACpk_peak_178	85	.	4.68994	11.0793	8.53295	248
chr1	37075712	37076031	ATACpk_peak_178	85	.	4.68994	11.0793	8.53295	248
chr1	37075688	37076168	ATACpk_peak_178	85	.	4.68994	11.0793	8.53295	248
chr1	37299626	37300938	ATACpk_peak_179	456	.	11.8186	49.0453	45.6633	283
chr1	37299658	37300988	ATACpk_peak_179	456	.	11.8186	49.0453	45.6633	283
chr1	37299626	37300988	ATACpk_peak_179	456	.	11.8186	49.0453	45.6633	283
chr1	37429462	37430599	ATACpk_peak_180	673	.	15.1954	71.0603	67.3734	629
chr1	37429443	37430599	ATACpk_peak_180	673	.	15.1954	71.0603	67.3734	629
chr1	37429443	37430558	ATACpk_peak_180	673	.	15.1954	71.0603	67.3734	629
chr1	37864567	37865854	ATACpk_peak_182	789	.	16.8838	82.7425	78.9221	633
chr1	37864567	37865730	ATACpk_peak_182	789	.	16.8838	82.7425	78.9221	633
chr1	37864567	37865581	ATACpk_peak_182	789	.	16.8838	82.7425	78.9221	633
chr1	37871829	37872465	ATACpk_peak_183	185	.	6.94111	21.415	18.5672	736
chr1	37871937	37872589	ATACpk_peak_183	185	.	6.94111	21.415	18.5672	736
chr1	37872131	37872439	ATACpk_peak_183	185	.	6.94111	21.415	18.5672	736
chr1	37890125	37890760	ATACpk_peak_184	282	.	8.81708	31.3349	28.2675	608
chr1	37890125	37890760	ATACpk_peak_184	282	.	8.81708	31.3349	28.2675	608
chr1	37890314	37890744	ATACpk_peak_184	282	.	8.81708	31.3349	28.2675	608
chr1	37996739	37998734	ATACpk_peak_185	1116	.	21.3861	115.703	111.606	1290
chr1	37996739	37998734	ATACpk_peak_185	1116	.	21.3861	115.703	111.606	1290
chr1	37996756	37998641	ATACpk_peak_185	1116	.	21.3861	115.703	111.606	1290
chr1	38129062	38130204	ATACpk_peak_186	213	.	7.5039	24.2823	21.367	944
chr1	38128985	38130204	ATACpk_peak_186	213	.	7.5039	24.2823	21.367	944
chr1	38129032	38130204	ATACpk_peak_186	213	.	7.5039	24.2823	21.367	944
chr1	38132799	38133307	ATACpk_peak_187	57	.	3.93955	8.12754	5.70762	294
chr1	38133025	38133307	ATACpk_peak_187	57	.	3.93955	8.12754	5.70762	294
chr1	38233407	38234282	ATACpk_peak_188	158	.	6.37831	18.6513	15.8732	672
chr1	38233514	38234282	ATACpk_peak_188	158	.	6.37831	18.6513	15.8732	672
chr1	38233407	38234282	ATACpk_peak_188	158	.	6.37831	18.6513	15.8732	672
chr1	38429654	38430676	ATACpk_peak_189	562	.	13.507	59.81	56.2679	883
chr1	38429765	38430676	ATACpk_peak_189	562	.	13.507	59.81	56.2679	883
chr1	38430101	38430671	ATACpk_peak_189	562	.	13.507	59.81	56.2679	883
chr1	38767130	38767349	ATACpk_peak_190	26	.	3.00156	4.89156	2.67543	77
chr1	38809238	38809638	ATACpk_peak_191	26	.	3.00156	4.89156	2.67543	40
chr1	38809238	38809638	ATACpk_peak_191	26	.	3.00156	4.89156	2.67543	40
chr1	38809276	38809638	ATACpk_peak_191	26	.	3.00156	4.89156	2.67543	40
chr1	38835871	38836687	ATACpk_peak_192	141	.	6.00312	16.8707	14.1409	294
chr1	38835860	38836687	ATACpk_peak_192	141	.	6.00312	16.8707	14.1409	294
chr1	38835944	38836687	ATACpk_peak_192	141	.	6.00312	16.8707	14.1409	294
chr1	38987278	38988330	ATACpk_peak_193	750	.	16.321	78.8033	75.0266	527
chr1	38987278	38988330	ATACpk_peak_193	750	.	16.321	78.8033	75.0266	527
chr1	38987278	38988150	ATACpk_peak_193	750	.	16.321	78.8033	75.0266	527
chr1	39045846	39046300	ATACpk_peak_194	44	.	3.56435	6.76701	4.42147	50
chr1	39045846	39046300	ATACpk_peak_194	44	.	3.56435	6.76701	4.42147	50
chr1	39193129	39193291	ATACpk_peak_195	100	.	5.06513	12.6585	10.057	987
chr1	39193751	39194240	ATACpk_peak_195	100	.	5.06513	12.6585	10.057	987
chr1	39193761	39194240	ATACpk_peak_195	100	.	5.06513	12.6585	10.057	987
chr1	39193847	39194240	ATACpk_peak_195	100	.	5.06513	12.6585	10.057	987
chr1	39367333	39368398	ATACpk_peak_196	194	.	7.1287	22.3596	19.4893	611
chr1	39367417	39368398	ATACpk_peak_196	194	.	7.1287	22.3596	19.4893	611
chr1	39367333	39368321	ATACpk_peak_196	194	.	7.1287	22.3596	19.4893	611
chr1	39535538	39536395	ATACpk_peak_198	378	.	10.5055	41.0519	37.8028	179
chr1	39535538	39536396	ATACpk_peak_198	378	.	10.5055	41.0519	37.8028	179
chr1	39535538	39536365	ATACpk_peak_198	378	.	10.5055	41.0519	37.8028	179
chr1	39576729	39577639	ATACpk_peak_199	468	.	12.0062	50.2154	46.8149	603
chr1	39576729	39577556	ATACpk_peak_199	468	.	12.0062	50.2154	46.8149	603
chr1	39576729	39577566	ATACpk_peak_199	468	.	12.0062	50.2154	46.8149	603
chr1	39720792	39721509	ATACpk_peak_200	63	.	4.12714	8.83787	6.38376	573
chr1	39720792	39721523	ATACpk_peak_200	63	.	4.12714	8.83787	6.38376	573
chr1	39720798	39721543	ATACpk_peak_200	63	.	4.12714	8.83787	6.38376	573
chr1	39755985	39756453	ATACpk_peak_201	57	.	3.93955	8.12754	5.70762	301
chr1	39755795	39756660	ATACpk_peak_201	57	.	3.93955	8.12754	5.70762	301
chr1	39756068	39756653	ATACpk_peak_201	57	.	3.93955	8.12754	5.70762	301
chr1	39892902	39893362	ATACpk_peak_202	85	.	4.68994	11.0793	8.53295	356
chr1	39892889	39893284	ATACpk_peak_202	85	.	4.68994	11.0793	8.53295	356
chr1	39900740	39901072	ATACpk_peak_203	63	.	4.12714	8.83787	6.38376	319
chr1	39900740	39901072	ATACpk_peak_203	63	.	4.12714	8.83787	6.38376	319
chr1	39900740	39901060	ATACpk_peak_203	63	.	4.12714	8.83787	6.38376	319
chr1	40211447	40212413	ATACpk_peak_204	70	.	4.31474	9.56711	7.0808	319
chr1	40211432	40212410	ATACpk_peak_204	70	.	4.31474	9.56711	7.0808	319
chr1	40211432	40211814	ATACpk_peak_204	70	.	4.31474	9.56711	7.0808	319
chr1	40767826	40768154	ATACpk_peak_205	70	.	4.31474	9.56711	7.0808	96
chr1	40767826	40767936	ATACpk_peak_205	70	.	4.31474	9.56711	7.0808	96
chr1	40790298	40790841	ATACpk_peak_206	252	.	8.25429	28.2535	25.2493	432
chr1	40790430	40790949	ATACpk_peak_206	252	.	8.25429	28.2535	25.2493	432
chr1	40790454	40790993	ATACpk_peak_206	252	.	8.25429	28.2535	25.2493	432
chr1	40915978	40916831	ATACpk_peak_207	50	.	3.75195	7.43695	5.05349	370
chr1	42697939	42698387	ATACpk_peak_208	57	.	3.93955	8.12754	5.70762	236
chr1	42698034	42698387	ATACpk_peak_208	57	.	3.93955	8.12754	5.70762	236
chr1	42850880	42851686	ATACpk_peak_209	367	.	10.3179	39.9396	36.7101	415
chr1	42850880	42851686	ATACpk_peak_209	367	.	10.3179	39.9396	36.7101	415
chr1	42850938	42851686	ATACpk_peak_209	367	.	10.3179	39.9396	36.7101	415
chr1	42883493	42883759	ATACpk_peak_210	185	.	6.94111	21.415	18.5672	121
chr1	42883493	42883755	ATACpk_peak_210	185	.	6.94111	21.415	18.5672	121
chr1	42883493	42883727	ATACpk_peak_210	185	.	6.94111	21.415	18.5672	121
chr1	43098402	43098963	ATACpk_peak_211	167	.	6.56591	19.5605	16.7585	335
chr1	43098424	43098963	ATACpk_peak_211	167	.	6.56591	19.5605	16.7585	335
chr1	43098393	43098963	ATACpk_peak_211	167	.	6.56591	19.5605	16.7585	335
chr1	43827273	43828125	ATACpk_peak_213	636	.	14.6326	67.2598	63.6192	833
chr1	43827046	43828168	ATACpk_peak_213	636	.	14.6326	67.2598	63.6192	833
chr1	43827046	43828168	ATACpk_peak_213	636	.	14.6326	67.2598	63.6192	833
chr1	43933580	43934556	ATACpk_peak_214	1031	.	20.2605	107.238	103.192	384
chr1	43933580	43934619	ATACpk_peak_214	1031	.	20.2605	107.238	103.192	384
chr1	43933580	43934619	ATACpk_peak_214	1031	.	20.2605	107.238	103.192	384
chr1	44081275	44082762	ATACpk_peak_215	116	.	5.44033	14.3002	11.646	734
chr1	44080979	44082333	ATACpk_peak_215	116	.	5.44033	14.3002	11.646	734
chr1	44082599	44082762	ATACpk_peak_215	116	.	5.44033	14.3002	11.646	734
chr1	44081259	44082686	ATACpk_peak_215	116	.	5.44033	14.3002	11.646	734
chr1	44083939	44084440	ATACpk_peak_216	38	.	3.37675	6.11872	3.81342	201
chr1	44101629	44102768	ATACpk_peak_217	586	.	13.8822	62.2702	58.6945	724
chr1	44101629	44102768	ATACpk_peak_217	586	.	13.8822	62.2702	58.6945	724
chr1	44101629	44102768	ATACpk_peak_217	586	.	13.8822	62.2702	58.6945	724
chr1	44147658	44148271	ATACpk_peak_218	282	.	8.81708	31.3349	28.2675	410
chr1	44147651	44148271	ATACpk_peak_218	282	.	8.81708	31.3349	28.2675	410
chr1	44147622	44148164	ATACpk_peak_218	282	.	8.81708	31.3349	28.2675	410
chr1	44480644	44481528	ATACpk_peak_219	32	.	3.18916	5.49317	3.23067	133
chr1	44480724	44481528	ATACpk_peak_219	32	.	3.18916	5.49317	3.23067	133
chr1	44480719	44481528	ATACpk_peak_219	32	.	3.18916	5.49317	3.23067	133
chr1	44959869	44960307	ATACpk_peak_221	63	.	4.12714	8.83787	6.38376	430
chr1	44959869	44960235	ATACpk_peak_221	63	.	4.12714	8.83787	6.38376	430
chr1	45205050	45205765	ATACpk_peak_222	124	.	5.62792	15.1431	12.4635	430
chr1	45205263	45205696	ATACpk_peak_222	124	.	5.62792	15.1431	12.4635	430
chr1	45794888	45795880	ATACpk_peak_223	411	.	11.0682	44.4342	41.1261	559
chr1	45794888	45795890	ATACpk_peak_223	411	.	11.0682	44.4342	41.1261	559
chr1	45794888	45795837	ATACpk_peak_223	411	.	11.0682	44.4342	41.1261	559
chr1	45925678	45926215	ATACpk_peak_224	63	.	4.12714	8.83787	6.38376	487
chr1	45925678	45926301	ATACpk_peak_224	63	.	4.12714	8.83787	6.38376	487
chr1	46066285	46067235	ATACpk_peak_225	77	.	4.50234	10.3145	7.79751	742
chr1	46066466	46067069	ATACpk_peak_225	77	.	4.50234	10.3145	7.79751	742
chr1	46066598	46067070	ATACpk_peak_225	77	.	4.50234	10.3145	7.79751	742
chr1	46425105	46425668	ATACpk_peak_228	92	.	4.87753	11.8608	9.28651	247
chr1	46425227	46425668	ATACpk_peak_228	92	.	4.87753	11.8608	9.28651	247
chr1	46425237	46425668	ATACpk_peak_228	92	.	4.87753	11.8608	9.28651	247
chr1	46449299	46449542	ATACpk_peak_229	38	.	3.37675	6.11872	3.81342	258
chr1	46449202	46449473	ATACpk_peak_229	38	.	3.37675	6.11872	3.81342	258
chr1	46521362	46522868	ATACpk_peak_230	141	.	6.00312	16.8707	14.1409	743
chr1	46521362	46522794	ATACpk_peak_230	141	.	6.00312	16.8707	14.1409	743
chr1	46521514	46522544	ATACpk_peak_230	141	.	6.00312	16.8707	14.1409	743
chr1	46852669	46854326	ATACpk_peak_234	1664	.	28.3272	170.686	166.427	954
chr1	46852669	46854326	ATACpk_peak_234	1664	.	28.3272	170.686	166.427	954
chr1	46852669	46854326	ATACpk_peak_234	1664	.	28.3272	170.686	166.427	954
chr1	47629085	47630227	ATACpk_peak_235	185	.	6.94111	21.415	18.5672	521
chr1	47629156	47630195	ATACpk_peak_235	185	.	6.94111	21.415	18.5672	521
chr1	47629085	47630227	ATACpk_peak_235	185	.	6.94111	21.415	18.5672	521
chr1	48546087	48547110	ATACpk_peak_236	124	.	5.62792	15.1431	12.4635	313
chr1	48546087	48547110	ATACpk_peak_236	124	.	5.62792	15.1431	12.4635	313
chr1	48546087	48546911	ATACpk_peak_236	124	.	5.62792	15.1431	12.4635	313
chr1	50107073	50108098	ATACpk_peak_237	176	.	6.75351	20.4818	17.6567	384
chr1	50107180	50108263	ATACpk_peak_237	176	.	6.75351	20.4818	17.6567	384
chr1	50107274	50107699	ATACpk_peak_237	176	.	6.75351	20.4818	17.6567	384
chr1	50926820	50927959	ATACpk_peak_238	204	.	7.3163	23.3155	20.4228	636
chr1	50927072	50927922	ATACpk_peak_238	204	.	7.3163	23.3155	20.4228	636
chr1	50927168	50927959	ATACpk_peak_238	204	.	7.3163	23.3155	20.4228	636
chr1	51477608	51478839	ATACpk_peak_239	445	.	11.631	47.882	44.5182	804
chr1	51477648	51478839	ATACpk_peak_239	445	.	11.631	47.882	44.5182	804
chr1	51477687	51478839	ATACpk_peak_239	445	.	11.631	47.882	44.5182	804
chr1	51915552	51915980	ATACpk_peak_240	70	.	4.31474	9.56711	7.0808	358
chr1	51915552	51915980	ATACpk_peak_240	70	.	4.31474	9.56711	7.0808	358
chr1	52119252	52119977	ATACpk_peak_241	194	.	7.1287	22.3596	19.4893	222
chr1	52119231	52119977	ATACpk_peak_241	194	.	7.1287	22.3596	19.4893	222
chr1	52119231	52119977	ATACpk_peak_241	194	.	7.1287	22.3596	19.4893	222
chr1	52232230	52233604	ATACpk_peak_242	456	.	11.8186	49.0453	45.6633	1171
chr1	52232164	52233604	ATACpk_peak_242	456	.	11.8186	49.0453	45.6633	1171
chr1	52232146	52233540	ATACpk_peak_242	456	.	11.8186	49.0453	45.6633	1171
chr1	52400070	52400603	ATACpk_peak_243	50	.	3.75195	7.43695	5.05349	472
chr1	52400070	52400603	ATACpk_peak_243	50	.	3.75195	7.43695	5.05349	472
chr1	52400070	52400577	ATACpk_peak_243	50	.	3.75195	7.43695	5.05349	472
chr1	52500415	52500776	ATACpk_peak_244	70	.	4.31474	9.56711	7.0808	184
chr1	52500415	52500776	ATACpk_peak_244	70	.	4.31474	9.56711	7.0808	184
chr1	52500415	52500724	ATACpk_peak_244	70	.	4.31474	9.56711	7.0808	184
chr1	52630518	52630919	ATACpk_peak_245	108	.	5.25273	13.4718	10.8435	454
chr1	52630565	52630919	ATACpk_peak_245	108	.	5.25273	13.4718	10.8435	454
chr1	52630636	52630919	ATACpk_peak_245	108	.	5.25273	13.4718	10.8435	454
chr1	52844503	52845893	ATACpk_peak_246	574	.	13.6946	61.0372	57.4783	505
chr1	52844503	52845893	ATACpk_peak_246	574	.	13.6946	61.0372	57.4783	505
chr1	52844619	52845893	ATACpk_peak_246	574	.	13.6946	61.0372	57.4783	505
chr1	52852205	52852830	ATACpk_peak_247	57	.	3.93955	8.12754	5.70762	223
chr1	52852205	52852830	ATACpk_peak_247	57	.	3.93955	8.12754	5.70762	223
chr1	52852325	52852830	ATACpk_peak_247	57	.	3.93955	8.12754	5.70762	223
chr1	52962567	52963289	ATACpk_peak_248	57	.	3.93955	8.12754	5.70762	51
chr1	52962610	52963289	ATACpk_peak_248	57	.	3.93955	8.12754	5.70762	51
chr1	53187565	53187858	ATACpk_peak_249	85	.	4.68994	11.0793	8.53295	344
chr1	53187572	53187858	ATACpk_peak_249	85	.	4.68994	11.0793	8.53295	344
chr1	53296767	53297359	ATACpk_peak_250	213	.	7.5039	24.2823	21.367	299
chr1	53296767	53297323	ATACpk_peak_250	213	.	7.5039	24.2823	21.367	299
chr1	53296767	53297359	ATACpk_peak_250	213	.	7.5039	24.2823	21.367	299
chr1	53352419	53352739	ATACpk_peak_251	132	.	5.81552	16	13.295	363
chr1	53352450	53352739	ATACpk_peak_251	132	.	5.81552	16	13.295	363
chr1	53352436	53352739	ATACpk_peak_251	132	.	5.81552	16	13.295	363
chr1	53706077	53706375	ATACpk_peak_253	50	.	3.75195	7.43695	5.05349	130
chr1	53706075	53706375	ATACpk_peak_253	50	.	3.75195	7.43695	5.05349	130
chr1	53706286	53706375	ATACpk_peak_253	50	.	3.75195	7.43695	5.05349	130
chr1	53706664	53706922	ATACpk_peak_254	57	.	3.93955	8.12754	5.70762	135
chr1	53706664	53706930	ATACpk_peak_254	57	.	3.93955	8.12754	5.70762	135
chr1	53706664	53707208	ATACpk_peak_254	57	.	3.93955	8.12754	5.70762	135
chr1	53710893	53711374	ATACpk_peak_255	44	.	3.56435	6.76701	4.42147	659
chr1	53784591	53785698	ATACpk_peak_256	456	.	11.8186	49.0453	45.6633	613
chr1	53784591	53785679	ATACpk_peak_256	456	.	11.8186	49.0453	45.6633	613
chr1	53784591	53785698	ATACpk_peak_256	456	.	11.8186	49.0453	45.6633	613
chr1	54194854	54195153	ATACpk_peak_257	32	.	3.18916	5.49317	3.23067	266
chr1	54194854	54195106	ATACpk_peak_257	32	.	3.18916	5.49317	3.23067	266
chr1	54250350	54250856	ATACpk_peak_258	194	.	7.1287	22.3596	19.4893	352
chr1	54250360	54250856	ATACpk_peak_258	194	.	7.1287	22.3596	19.4893	352
chr1	54250526	54250856	ATACpk_peak_258	194	.	7.1287	22.3596	19.4893	352
chr1	54329828	54330614	ATACpk_peak_259	57	.	3.93955	8.12754	5.70762	631
chr1	54329842	54330614	ATACpk_peak_259	57	.	3.93955	8.12754	5.70762	631
chr1	54329313	54330167	ATACpk_peak_259	57	.	3.93955	8.12754	5.70762	631
chr1	54438632	54439051	ATACpk_peak_260	50	.	3.75195	7.43695	5.05349	464
chr1	54438791	54439095	ATACpk_peak_260	50	.	3.75195	7.43695	5.05349	464
chr1	54557402	54558073	ATACpk_peak_261	232	.	7.87909	26.2476	23.2872	248
chr1	54557402	54558073	ATACpk_peak_261	232	.	7.87909	26.2476	23.2872	248
chr1	54557402	54558073	ATACpk_peak_261	232	.	7.87909	26.2476	23.2872	248
chr1	54925769	54926518	ATACpk_peak_262	232	.	7.87909	26.2476	23.2872	411
chr1	54925893	54926518	ATACpk_peak_262	232	.	7.87909	26.2476	23.2872	411
chr1	54925903	54926462	ATACpk_peak_262	232	.	7.87909	26.2476	23.2872	411
chr1	55026979	55028482	ATACpk_peak_263	367	.	10.3179	39.9396	36.7101	527
chr1	55026979	55028381	ATACpk_peak_263	367	.	10.3179	39.9396	36.7101	527
chr1	55026979	55028124	ATACpk_peak_263	367	.	10.3179	39.9396	36.7101	527
chr1	55052288	55053268	ATACpk_peak_264	538	.	13.1318	57.3737	53.8659	652
chr1	55052285	55053268	ATACpk_peak_264	538	.	13.1318	57.3737	53.8659	652
chr1	55052168	55053268	ATACpk_peak_264	538	.	13.1318	57.3737	53.8659	652
chr1	55074255	55075606	ATACpk_peak_265	132	.	5.81552	16	13.295	648
chr1	55074255	55075606	ATACpk_peak_265	132	.	5.81552	16	13.295	648
chr1	55074388	55075606	ATACpk_peak_265	132	.	5.81552	16	13.295	648
chr1	55087517	55088523	ATACpk_peak_266	636	.	14.6326	67.2598	63.6192	514
chr1	55087517	55088523	ATACpk_peak_266	636	.	14.6326	67.2598	63.6192	514
chr1	55087517	55088523	ATACpk_peak_266	636	.	14.6326	67.2598	63.6192	514
chr1	55130962	55131763	ATACpk_peak_267	367	.	10.3179	39.9396	36.7101	401
chr1	55130862	55131763	ATACpk_peak_267	367	.	10.3179	39.9396	36.7101	401
chr1	55130899	55131763	ATACpk_peak_267	367	.	10.3179	39.9396	36.7101	401
chr1	55236351	55238879	ATACpk_peak_269	623	.	14.445	66.004	62.3791	869
chr1	55236351	55238765	ATACpk_peak_269	623	.	14.445	66.004	62.3791	869
chr1	55236825	55238833	ATACpk_peak_269	623	.	14.445	66.004	62.3791	869
chr1	55362300	55363921	ATACpk_peak_270	479	.	12.1938	51.3923	47.9733	696
chr1	55362229	55363823	ATACpk_peak_270	479	.	12.1938	51.3923	47.9733	696
chr1	55362474	55363818	ATACpk_peak_270	479	.	12.1938	51.3923	47.9733	696
chr1	55405352	55406511	ATACpk_peak_271	345	.	9.94267	37.7386	34.549	522
chr1	55405352	55406664	ATACpk_peak_271	345	.	9.94267	37.7386	34.549	522
chr1	55405352	55406591	ATACpk_peak_271	345	.	9.94267	37.7386	34.549	522
chr1	56973064	56973231	ATACpk_peak_273	32	.	3.18916	5.49317	3.23067	206
chr1	57377432	57378189	ATACpk_peak_275	334	.	9.75507	36.6501	33.4809	220
chr1	57377432	57378189	ATACpk_peak_275	334	.	9.75507	36.6501	33.4809	220
chr1	57377432	57378177	ATACpk_peak_275	334	.	9.75507	36.6501	33.4809	220
chr1	57406399	57406787	ATACpk_peak_276	57	.	3.93955	8.12754	5.70762	217
chr1	57406399	57406787	ATACpk_peak_276	57	.	3.93955	8.12754	5.70762	217
chr1	57406399	57406787	ATACpk_peak_276	57	.	3.93955	8.12754	5.70762	217
chr1	57969574	57970292	ATACpk_peak_277	324	.	9.56747	35.5699	32.4211	730
chr1	57969512	57970292	ATACpk_peak_277	324	.	9.56747	35.5699	32.4211	730
chr1	57969488	57970292	ATACpk_peak_277	324	.	9.56747	35.5699	32.4211	730
chr1	57995721	57996387	ATACpk_peak_278	272	.	8.62948	30.2984	27.2518	310
chr1	57995844	57996387	ATACpk_peak_278	272	.	8.62948	30.2984	27.2518	310
chr1	57995842	57996387	ATACpk_peak_278	272	.	8.62948	30.2984	27.2518	310
chr1	58029750	58030125	ATACpk_peak_279	38	.	3.37675	6.11872	3.81342	175
chr1	58045348	58045681	ATACpk_peak_280	85	.	4.68994	11.0793	8.53295	415
chr1	58045189	58045681	ATACpk_peak_280	85	.	4.68994	11.0793	8.53295	415
chr1	58105515	58105927	ATACpk_peak_281	108	.	5.25273	13.4718	10.8435	310
chr1	58105515	58105927	ATACpk_peak_281	108	.	5.25273	13.4718	10.8435	310
chr1	58392294	58393586	ATACpk_peak_282	411	.	11.0682	44.4342	41.1261	581
chr1	58392239	58393548	ATACpk_peak_282	411	.	11.0682	44.4342	41.1261	581
chr1	58392290	58393586	ATACpk_peak_282	411	.	11.0682	44.4342	41.1261	581
chr1	58423159	58424322	ATACpk_peak_284	232	.	7.87909	26.2476	23.2872	872
chr1	58423159	58424518	ATACpk_peak_284	232	.	7.87909	26.2476	23.2872	872
chr1	58423337	58424324	ATACpk_peak_284	232	.	7.87909	26.2476	23.2872	872
chr1	58445220	58445611	ATACpk_peak_285	213	.	7.5039	24.2823	21.367	245
chr1	58445214	58445782	ATACpk_peak_285	213	.	7.5039	24.2823	21.367	245
chr1	58445214	58445742	ATACpk_peak_285	213	.	7.5039	24.2823	21.367	245
chr1	58504455	58505380	ATACpk_peak_286	468	.	12.0062	50.2154	46.8149	454
chr1	58504455	58505380	ATACpk_peak_286	468	.	12.0062	50.2154	46.8149	454
chr1	58504455	58505228	ATACpk_peak_286	468	.	12.0062	50.2154	46.8149	454
chr1	58585899	58586824	ATACpk_peak_287	141	.	6.00312	16.8707	14.1409	582
chr1	58585725	58586824	ATACpk_peak_287	141	.	6.00312	16.8707	14.1409	582
chr1	58585960	58586793	ATACpk_peak_287	141	.	6.00312	16.8707	14.1409	582
chr1	58695413	58697179	ATACpk_peak_288	132	.	5.81552	16	13.295	610
chr1	58695413	58696729	ATACpk_peak_288	132	.	5.81552	16	13.295	610
chr1	58695927	58697061	ATACpk_peak_288	132	.	5.81552	16	13.295	610
chr1	58711374	58711863	ATACpk_peak_289	124	.	5.62792	15.1431	12.4635	225
chr1	58711374	58711863	ATACpk_peak_289	124	.	5.62792	15.1431	12.4635	225
chr1	58711447	58711863	ATACpk_peak_289	124	.	5.62792	15.1431	12.4635	225
chr1	58973134	58974091	ATACpk_peak_290	272	.	8.62948	30.2984	27.2518	538
chr1	58973182	58974091	ATACpk_peak_290	272	.	8.62948	30.2984	27.2518	538
chr1	58973134	58974028	ATACpk_peak_290	272	.	8.62948	30.2984	27.2518	538
chr1	59094471	59094974	ATACpk_peak_291	150	.	6.19072	17.7546	15.0004	417
chr1	59094471	59094994	ATACpk_peak_291	150	.	6.19072	17.7546	15.0004	417
chr1	59094496	59095008	ATACpk_peak_291	150	.	6.19072	17.7546	15.0004	417
chr1	59111381	59111696	ATACpk_peak_292	21	.	2.81396	4.31522	2.14996	73
chr1	59111544	59111696	ATACpk_peak_292	21	.	2.81396	4.31522	2.14996	73
chr1	59119752	59120776	ATACpk_peak_293	411	.	11.0682	44.4342	41.1261	154
chr1	59119752	59120776	ATACpk_peak_293	411	.	11.0682	44.4342	41.1261	154
chr1	59119752	59120776	ATACpk_peak_293	411	.	11.0682	44.4342	41.1261	154
chr1	59121155	59121303	ATACpk_peak_294	21	.	2.81396	4.31522	2.14996	157
chr1	59171642	59171881	ATACpk_peak_295	32	.	3.18916	5.49317	3.23067	190
chr1	59171468	59171854	ATACpk_peak_295	32	.	3.18916	5.49317	3.23067	190
chr1	59236866	59238165	ATACpk_peak_296	367	.	10.3179	39.9396	36.7101	547
chr1	59236845	59238155	ATACpk_peak_296	367	.	10.3179	39.9396	36.7101	547
chr1	59236847	59238057	ATACpk_peak_296	367	.	10.3179	39.9396	36.7101	547
chr1	59604095	59604504	ATACpk_peak_297	38	.	3.37675	6.11872	3.81342	132
chr1	59604086	59604338	ATACpk_peak_297	38	.	3.37675	6.11872	3.81342	132
chr1	59606527	59607264	ATACpk_peak_298	92	.	4.87753	11.8608	9.28651	326
chr1	59606687	59607259	ATACpk_peak_298	92	.	4.87753	11.8608	9.28651	326
chr1	59606608	59607264	ATACpk_peak_298	92	.	4.87753	11.8608	9.28651	326
chr1	59670077	59671259	ATACpk_peak_299	252	.	8.25429	28.2535	25.2493	706
chr1	59670126	59671259	ATACpk_peak_299	252	.	8.25429	28.2535	25.2493	706
chr1	59670085	59671208	ATACpk_peak_299	252	.	8.25429	28.2535	25.2493	706
chr1	59684579	59685698	ATACpk_peak_300	167	.	6.56591	19.5605	16.7585	353
chr1	59684675	59685380	ATACpk_peak_300	167	.	6.56591	19.5605	16.7585	353
chr1	59684888	59685585	ATACpk_peak_300	167	.	6.56591	19.5605	16.7585	353
chr1	59762853	59763962	ATACpk_peak_301	132	.	5.81552	16	13.295	437
chr1	59762923	59763962	ATACpk_peak_301	132	.	5.81552	16	13.295	437
chr1	59763007	59763920	ATACpk_peak_301	132	.	5.81552	16	13.295	437
chr1	59912523	59913768	ATACpk_peak_303	411	.	11.0682	44.4342	41.1261	566
chr1	59912523	59913943	ATACpk_peak_303	411	.	11.0682	44.4342	41.1261	566
chr1	59912559	59913785	ATACpk_peak_303	411	.	11.0682	44.4342	41.1261	566
chr1	60043026	60043820	ATACpk_peak_304	77	.	4.50234	10.3145	7.79751	326
chr1	60043026	60043820	ATACpk_peak_304	77	.	4.50234	10.3145	7.79751	326
chr1	60043026	60043569	ATACpk_peak_304	77	.	4.50234	10.3145	7.79751	326
chr1	60097518	60098734	ATACpk_peak_305	422	.	11.2558	45.5763	42.2495	1061
chr1	60097608	60098734	ATACpk_peak_305	422	.	11.2558	45.5763	42.2495	1061
chr1	60097242	60098723	ATACpk_peak_305	422	.	11.2558	45.5763	42.2495	1061
chr1	60180069	60181067	ATACpk_peak_306	699	.	15.5706	73.6207	69.9037	311
chr1	60180069	60181085	ATACpk_peak_306	699	.	15.5706	73.6207	69.9037	311
chr1	60180079	60180958	ATACpk_peak_306	699	.	15.5706	73.6207	69.9037	311
chr1	60343160	60343633	ATACpk_peak_307	116	.	5.44033	14.3002	11.646	287
chr1	60343160	60343592	ATACpk_peak_307	116	.	5.44033	14.3002	11.646	287
chr1	60343160	60343607	ATACpk_peak_307	116	.	5.44033	14.3002	11.646	287
chr1	60409199	60410188	ATACpk_peak_308	345	.	9.94267	37.7386	34.549	603
chr1	60409059	60410188	ATACpk_peak_308	345	.	9.94267	37.7386	34.549	603
chr1	60409220	60410188	ATACpk_peak_308	345	.	9.94267	37.7386	34.549	603
chr1	60566419	60567246	ATACpk_peak_309	242	.	8.06669	27.2456	24.263	399
chr1	60566419	60567246	ATACpk_peak_309	242	.	8.06669	27.2456	24.263	399
chr1	60566419	60567228	ATACpk_peak_309	242	.	8.06669	27.2456	24.263	399
chr1	60920771	60921262	ATACpk_peak_311	50	.	3.75195	7.43695	5.05349	413
chr1	60920771	60921262	ATACpk_peak_311	50	.	3.75195	7.43695	5.05349	413
chr1	61497878	61499521	ATACpk_peak_313	132	.	5.81552	16	13.295	648
chr1	61497977	61499510	ATACpk_peak_313	132	.	5.81552	16	13.295	648
chr1	61497878	61499521	ATACpk_peak_313	132	.	5.81552	16	13.295	648
chr1	61514614	61515199	ATACpk_peak_314	116	.	5.44033	14.3002	11.646	483
chr1	61514447	61515056	ATACpk_peak_314	116	.	5.44033	14.3002	11.646	483
chr1	61514490	61514893	ATACpk_peak_314	116	.	5.44033	14.3002	11.646	483
chr1	61638856	61639330	ATACpk_peak_315	44	.	3.56435	6.76701	4.42147	80
chr1	61638856	61639330	ATACpk_peak_315	44	.	3.56435	6.76701	4.42147	80
chr1	61638856	61639249	ATACpk_peak_315	44	.	3.56435	6.76701	4.42147	80
chr1	62743738	62743942	ATACpk_peak_316	44	.	3.56435	6.76701	4.42147	111
chr1	62743738	62743836	ATACpk_peak_316	44	.	3.56435	6.76701	4.42147	111
chr1	62794762	62795928	ATACpk_peak_317	57	.	3.93955	8.12754	5.70762	950
chr1	62794762	62795887	ATACpk_peak_317	57	.	3.93955	8.12754	5.70762	950
chr1	62794762	62795204	ATACpk_peak_317	57	.	3.93955	8.12754	5.70762	950
chr1	63113175	63114539	ATACpk_peak_319	50	.	3.75195	7.43695	5.05349	361
chr1	63113175	63114539	ATACpk_peak_319	50	.	3.75195	7.43695	5.05349	361
chr1	63113523	63114322	ATACpk_peak_319	50	.	3.75195	7.43695	5.05349	361
chr1	63176301	63177354	ATACpk_peak_320	272	.	8.62948	30.2984	27.2518	455
chr1	63176301	63177299	ATACpk_peak_320	272	.	8.62948	30.2984	27.2518	455
chr1	63176466	63177103	ATACpk_peak_320	272	.	8.62948	30.2984	27.2518	455
chr1	63185431	63185694	ATACpk_peak_321	108	.	5.25273	13.4718	10.8435	458
chr1	63185436	63185694	ATACpk_peak_321	108	.	5.25273	13.4718	10.8435	458
chr1	63185280	63185694	ATACpk_peak_321	108	.	5.25273	13.4718	10.8435	458
chr1	63247358	63247521	ATACpk_peak_322	38	.	3.37675	6.11872	3.81342	69
chr1	63247244	63247521	ATACpk_peak_322	38	.	3.37675	6.11872	3.81342	69
chr1	63247244	63247408	ATACpk_peak_322	38	.	3.37675	6.11872	3.81342	69
chr1	63247838	63248629	ATACpk_peak_323	57	.	3.93955	8.12754	5.70762	634
chr1	63247838	63248571	ATACpk_peak_323	57	.	3.93955	8.12754	5.70762	634
chr1	63247838	63248572	ATACpk_peak_323	57	.	3.93955	8.12754	5.70762	634
chr1	63273105	63273839	ATACpk_peak_324	282	.	8.81708	31.3349	28.2675	386
chr1	63272891	63273839	ATACpk_peak_324	282	.	8.81708	31.3349	28.2675	386
chr1	63272947	63273831	ATACpk_peak_324	282	.	8.81708	31.3349	28.2675	386
chr1	63445805	63446303	ATACpk_peak_325	77	.	4.50234	10.3145	7.79751	244
chr1	63445818	63446089	ATACpk_peak_325	77	.	4.50234	10.3145	7.79751	244
chr1	63445818	63446092	ATACpk_peak_325	77	.	4.50234	10.3145	7.79751	244
chr1	63730337	63730692	ATACpk_peak_327	100	.	5.06513	12.6585	10.057	270
chr1	63730312	63730687	ATACpk_peak_327	100	.	5.06513	12.6585	10.057	270
chr1	63730306	63730682	ATACpk_peak_327	100	.	5.06513	12.6585	10.057	270
chr1	64532048	64533169	ATACpk_peak_329	815	.	17.259	85.3927	81.5446	1295
chr1	64531732	64533169	ATACpk_peak_329	815	.	17.259	85.3927	81.5446	1295
chr1	64532016	64533169	ATACpk_peak_329	815	.	17.259	85.3927	81.5446	1295
chr1	64617197	64617809	ATACpk_peak_330	50	.	3.75195	7.43695	5.05349	128
chr1	64617197	64617809	ATACpk_peak_330	50	.	3.75195	7.43695	5.05349	128
chr1	64617197	64617809	ATACpk_peak_330	50	.	3.75195	7.43695	5.05349	128
chr1	64690029	64691552	ATACpk_peak_331	334	.	9.75507	36.6501	33.4809	711
chr1	64690029	64691552	ATACpk_peak_331	334	.	9.75507	36.6501	33.4809	711
chr1	64690084	64691552	ATACpk_peak_331	334	.	9.75507	36.6501	33.4809	711
chr1	64737431	64738491	ATACpk_peak_333	194	.	7.1287	22.3596	19.4893	1132
chr1	64737410	64738491	ATACpk_peak_333	194	.	7.1287	22.3596	19.4893	1132
chr1	64737386	64738327	ATACpk_peak_333	194	.	7.1287	22.3596	19.4893	1132
chr1	64798752	64800093	ATACpk_peak_334	242	.	8.06669	27.2456	24.263	747
chr1	64798776	64800062	ATACpk_peak_334	242	.	8.06669	27.2456	24.263	747
chr1	64798632	64800127	ATACpk_peak_334	242	.	8.06669	27.2456	24.263	747
chr1	64956534	64956999	ATACpk_peak_335	92	.	4.87753	11.8608	9.28651	274
chr1	64956534	64956999	ATACpk_peak_335	92	.	4.87753	11.8608	9.28651	274
chr1	65178720	65179448	ATACpk_peak_336	150	.	6.19072	17.7546	15.0004	366
chr1	65178720	65179448	ATACpk_peak_336	150	.	6.19072	17.7546	15.0004	366
chr1	65178720	65179448	ATACpk_peak_336	150	.	6.19072	17.7546	15.0004	366
chr1	65185738	65187103	ATACpk_peak_337	636	.	14.6326	67.2598	63.6192	842
chr1	65185945	65187116	ATACpk_peak_337	636	.	14.6326	67.2598	63.6192	842
chr1	65185738	65187116	ATACpk_peak_337	636	.	14.6326	67.2598	63.6192	842
chr1	65948533	65949527	ATACpk_peak_338	85	.	4.68994	11.0793	8.53295	527
chr1	65948533	65949672	ATACpk_peak_338	85	.	4.68994	11.0793	8.53295	527
chr1	65949192	65949444	ATACpk_peak_338	85	.	4.68994	11.0793	8.53295	527
chr1	66468006	66468517	ATACpk_peak_339	167	.	6.56591	19.5605	16.7585	109
chr1	66468006	66468517	ATACpk_peak_339	167	.	6.56591	19.5605	16.7585	109
chr1	66468006	66468473	ATACpk_peak_339	167	.	6.56591	19.5605	16.7585	109
chr1	66543828	66544627	ATACpk_peak_340	44	.	3.56435	6.76701	4.42147	702
chr1	66543744	66544816	ATACpk_peak_340	44	.	3.56435	6.76701	4.42147	702
chr1	66544121	66544816	ATACpk_peak_340	44	.	3.56435	6.76701	4.42147	702
chr1	66700674	66701489	ATACpk_peak_342	400	.	10.8807	43.2993	40.0106	121
chr1	66700674	66701489	ATACpk_peak_342	400	.	10.8807	43.2993	40.0106	121
chr1	66700674	66701419	ATACpk_peak_342	400	.	10.8807	43.2993	40.0106	121
chr1	66816532	66818043	ATACpk_peak_343	623	.	14.445	66.004	62.3791	940
chr1	66816532	66818043	ATACpk_peak_343	623	.	14.445	66.004	62.3791	940
chr1	66816532	66818043	ATACpk_peak_343	623	.	14.445	66.004	62.3791	940
chr1	67038458	67039264	ATACpk_peak_344	252	.	8.25429	28.2535	25.2493	689
chr1	67038175	67039348	ATACpk_peak_344	252	.	8.25429	28.2535	25.2493	689
chr1	67038388	67039299	ATACpk_peak_344	252	.	8.25429	28.2535	25.2493	689
chr1	69231813	69232077	ATACpk_peak_345	63	.	4.12714	8.83787	6.38376	371
chr1	69231989	69232289	ATACpk_peak_345	63	.	4.12714	8.83787	6.38376	371
chr1	69826798	69827362	ATACpk_peak_347	468	.	12.0062	50.2154	46.8149	135
chr1	69826798	69827362	ATACpk_peak_347	468	.	12.0062	50.2154	46.8149	135
chr1	69826798	69827362	ATACpk_peak_347	468	.	12.0062	50.2154	46.8149	135
chr1	70451879	70452225	ATACpk_peak_348	32	.	3.18916	5.49317	3.23067	269
chr1	71102082	71103277	ATACpk_peak_349	356	.	10.1303	38.8351	35.6252	667
chr1	71102082	71103277	ATACpk_peak_349	356	.	10.1303	38.8351	35.6252	667
chr1	71102082	71103248	ATACpk_peak_349	356	.	10.1303	38.8351	35.6252	667
chr1	71556994	71557471	ATACpk_peak_350	132	.	5.81552	16	13.295	188
chr1	71557016	71557465	ATACpk_peak_350	132	.	5.81552	16	13.295	188
chr1	71557021	71557471	ATACpk_peak_350	132	.	5.81552	16	13.295	188
chr1	71652887	71653917	ATACpk_peak_351	100	.	5.06513	12.6585	10.057	636
chr1	71652777	71653917	ATACpk_peak_351	100	.	5.06513	12.6585	10.057	636
chr1	71653264	71653551	ATACpk_peak_351	100	.	5.06513	12.6585	10.057	636
chr1	71837895	71838536	ATACpk_peak_352	92	.	4.87753	11.8608	9.28651	285
chr1	71837895	71838466	ATACpk_peak_352	92	.	4.87753	11.8608	9.28651	285
chr1	71837895	71838569	ATACpk_peak_352	92	.	4.87753	11.8608	9.28651	285
chr1	72211814	72213274	ATACpk_peak_353	242	.	8.06669	27.2456	24.263	525
chr1	72211814	72213274	ATACpk_peak_353	242	.	8.06669	27.2456	24.263	525
chr1	72211834	72212449	ATACpk_peak_353	242	.	8.06669	27.2456	24.263	525
chr1	72225066	72226536	ATACpk_peak_354	167	.	6.56591	19.5605	16.7585	969
chr1	72225371	72226470	ATACpk_peak_354	167	.	6.56591	19.5605	16.7585	969
chr1	72225429	72226278	ATACpk_peak_354	167	.	6.56591	19.5605	16.7585	969
chr1	72236459	72236941	ATACpk_peak_355	50	.	3.75195	7.43695	5.05349	247
chr1	72236572	72236874	ATACpk_peak_355	50	.	3.75195	7.43695	5.05349	247
chr1	72236459	72237111	ATACpk_peak_355	50	.	3.75195	7.43695	5.05349	247
chr1	72243838	72244360	ATACpk_peak_356	116	.	5.44033	14.3002	11.646	198
chr1	72243838	72244360	ATACpk_peak_356	116	.	5.44033	14.3002	11.646	198
chr1	72243838	72244360	ATACpk_peak_356	116	.	5.44033	14.3002	11.646	198
chr1	72254703	72255185	ATACpk_peak_357	116	.	5.44033	14.3002	11.646	121
chr1	72254703	72255541	ATACpk_peak_357	116	.	5.44033	14.3002	11.646	121
chr1	72254703	72255619	ATACpk_peak_357	116	.	5.44033	14.3002	11.646	121
chr1	72307105	72307506	ATACpk_peak_358	38	.	3.37675	6.11872	3.81342	248
chr1	72410909	72411203	ATACpk_peak_359	32	.	3.18916	5.49317	3.23067	159
chr1	72410909	72411203	ATACpk_peak_359	32	.	3.18916	5.49317	3.23067	159
chr1	72582798	72583731	ATACpk_peak_360	272	.	8.62948	30.2984	27.2518	401
chr1	72582798	72583731	ATACpk_peak_360	272	.	8.62948	30.2984	27.2518	401
chr1	72582846	72583530	ATACpk_peak_360	272	.	8.62948	30.2984	27.2518	401
chr1	72640468	72641432	ATACpk_peak_361	100	.	5.06513	12.6585	10.057	694
chr1	72640468	72641379	ATACpk_peak_361	100	.	5.06513	12.6585	10.057	694
chr1	72640468	72641416	ATACpk_peak_361	100	.	5.06513	12.6585	10.057	694
chr1	72700533	72700976	ATACpk_peak_362	92	.	4.87753	11.8608	9.28651	71
chr1	72700533	72700976	ATACpk_peak_362	92	.	4.87753	11.8608	9.28651	71
chr1	72700533	72700806	ATACpk_peak_362	92	.	4.87753	11.8608	9.28651	71
chr1	72710776	72711660	ATACpk_peak_363	141	.	6.00312	16.8707	14.1409	438
chr1	72710741	72711660	ATACpk_peak_363	141	.	6.00312	16.8707	14.1409	438
chr1	72710775	72711660	ATACpk_peak_363	141	.	6.00312	16.8707	14.1409	438
chr1	72856004	72856837	ATACpk_peak_364	108	.	5.25273	13.4718	10.8435	514
chr1	72856342	72856933	ATACpk_peak_364	108	.	5.25273	13.4718	10.8435	514
chr1	74206477	74206481	ATACpk_peak_365	21	.	2.81396	4.31522	2.14996	6
chr1	74236126	74237333	ATACpk_peak_366	213	.	7.5039	24.2823	21.367	406
chr1	74236126	74237333	ATACpk_peak_366	213	.	7.5039	24.2823	21.367	406
chr1	74236144	74237202	ATACpk_peak_366	213	.	7.5039	24.2823	21.367	406
chr1	74278210	74279796	ATACpk_peak_367	100	.	5.06513	12.6585	10.057	1144
chr1	74278261	74279270	ATACpk_peak_367	100	.	5.06513	12.6585	10.057	1144
chr1	74278091	74279565	ATACpk_peak_367	100	.	5.06513	12.6585	10.057	1144
chr1	74280367	74282226	ATACpk_peak_368	63	.	4.12714	8.83787	6.38376	1629
chr1	74280367	74282259	ATACpk_peak_368	63	.	4.12714	8.83787	6.38376	1629
chr1	74280608	74282383	ATACpk_peak_368	63	.	4.12714	8.83787	6.38376	1629
chr1	74283861	74285437	ATACpk_peak_369	841	.	17.6342	88.0617	84.1863	997
chr1	74283932	74285437	ATACpk_peak_369	841	.	17.6342	88.0617	84.1863	997
chr1	74284015	74285437	ATACpk_peak_369	841	.	17.6342	88.0617	84.1863	997
chr1	74303788	74304202	ATACpk_peak_370	108	.	5.25273	13.4718	10.8435	271
chr1	74303788	74304196	ATACpk_peak_370	108	.	5.25273	13.4718	10.8435	271
chr1	74332131	74333214	ATACpk_peak_371	411	.	11.0682	44.4342	41.1261	369
chr1	74332131	74333173	ATACpk_peak_371	411	.	11.0682	44.4342	41.1261	369
chr1	74332346	74332888	ATACpk_peak_371	411	.	11.0682	44.4342	41.1261	369
chr1	74386757	74387196	ATACpk_peak_372	150	.	6.19072	17.7546	15.0004	202
chr1	74386757	74387196	ATACpk_peak_372	150	.	6.19072	17.7546	15.0004	202
chr1	74386891	74387196	ATACpk_peak_372	150	.	6.19072	17.7546	15.0004	202
chr1	74390350	74390921	ATACpk_peak_373	32	.	3.18916	5.49317	3.23067	161
chr1	74390705	74390921	ATACpk_peak_373	32	.	3.18916	5.49317	3.23067	161
chr1	74391300	74392941	ATACpk_peak_374	223	.	7.6915	25.2597	22.3218	619
chr1	74391300	74392966	ATACpk_peak_374	223	.	7.6915	25.2597	22.3218	619
chr1	74391300	74392800	ATACpk_peak_374	223	.	7.6915	25.2597	22.3218	619
chr1	74396910	74397869	ATACpk_peak_375	100	.	5.06513	12.6585	10.057	623
chr1	74397095	74397710	ATACpk_peak_375	100	.	5.06513	12.6585	10.057	623
chr1	74396910	74397826	ATACpk_peak_375	100	.	5.06513	12.6585	10.057	623
chr1	74505509	74507123	ATACpk_peak_376	1101	.	21.1985	114.283	110.193	419
chr1	74505509	74506971	ATACpk_peak_376	1101	.	21.1985	114.283	110.193	419
chr1	74505509	74506768	ATACpk_peak_376	1101	.	21.1985	114.283	110.193	419
chr1	74541413	74542511	ATACpk_peak_377	63	.	4.12714	8.83787	6.38376	156
chr1	74587472	74588875	ATACpk_peak_378	990	.	19.6977	103.059	99.0461	703
chr1	74587472	74588875	ATACpk_peak_378	990	.	19.6977	103.059	99.0461	703
chr1	74587472	74588875	ATACpk_peak_378	990	.	19.6977	103.059	99.0461	703
chr1	74601005	74601679	ATACpk_peak_379	176	.	6.75351	20.4818	17.6567	422
chr1	74601005	74601809	ATACpk_peak_379	176	.	6.75351	20.4818	17.6567	422
chr1	74601005	74601732	ATACpk_peak_379	176	.	6.75351	20.4818	17.6567	422
chr1	74661376	74662224	ATACpk_peak_380	456	.	11.8186	49.0453	45.6633	817
chr1	74661375	74662374	ATACpk_peak_380	456	.	11.8186	49.0453	45.6633	817
chr1	74661420	74662246	ATACpk_peak_380	456	.	11.8186	49.0453	45.6633	817
chr1	74791568	74792068	ATACpk_peak_381	50	.	3.75195	7.43695	5.05349	86
chr1	74806661	74808247	ATACpk_peak_382	176	.	6.75351	20.4818	17.6567	422
chr1	74806762	74807723	ATACpk_peak_382	176	.	6.75351	20.4818	17.6567	422
chr1	74806870	74808096	ATACpk_peak_382	176	.	6.75351	20.4818	17.6567	422
chr1	74816916	74817242	ATACpk_peak_383	116	.	5.44033	14.3002	11.646	64
chr1	74854704	74855015	ATACpk_peak_384	85	.	4.68994	11.0793	8.53295	244
chr1	74858211	74858532	ATACpk_peak_385	70	.	4.31474	9.56711	7.0808	62
chr1	74858211	74858532	ATACpk_peak_385	70	.	4.31474	9.56711	7.0808	62
chr1	74858211	74858532	ATACpk_peak_385	70	.	4.31474	9.56711	7.0808	62
chr1	74898081	74898203	ATACpk_peak_387	77	.	4.50234	10.3145	7.79751	64
chr1	74898163	74898628	ATACpk_peak_387	77	.	4.50234	10.3145	7.79751	64
chr1	74900170	74901459	ATACpk_peak_388	124	.	5.62792	15.1431	12.4635	908
chr1	74900186	74901710	ATACpk_peak_388	124	.	5.62792	15.1431	12.4635	908
chr1	74900186	74901710	ATACpk_peak_388	124	.	5.62792	15.1431	12.4635	908
chr1	74916731	74917003	ATACpk_peak_389	57	.	3.93955	8.12754	5.70762	83
chr1	74916731	74917150	ATACpk_peak_389	57	.	3.93955	8.12754	5.70762	83
chr1	74918248	74918306	ATACpk_peak_390	32	.	3.18916	5.49317	3.23067	212
chr1	74918297	74918306	ATACpk_peak_390	32	.	3.18916	5.49317	3.23067	212
chr1	74918031	74918306	ATACpk_peak_390	32	.	3.18916	5.49317	3.23067	212
chr1	74919271	74919693	ATACpk_peak_391	26	.	3.00156	4.89156	2.67543	37
chr1	74919271	74919693	ATACpk_peak_391	26	.	3.00156	4.89156	2.67543	37
chr1	74925807	74926083	ATACpk_peak_392	44	.	3.56435	6.76701	4.42147	190
chr1	74925282	74926083	ATACpk_peak_392	44	.	3.56435	6.76701	4.42147	190
chr1	74935423	74935858	ATACpk_peak_393	108	.	5.25273	13.4718	10.8435	167
chr1	74935423	74935839	ATACpk_peak_393	108	.	5.25273	13.4718	10.8435	167
chr1	74949081	74950321	ATACpk_peak_394	92	.	4.87753	11.8608	9.28651	2142
chr1	74951223	74951809	ATACpk_peak_394	92	.	4.87753	11.8608	9.28651	2142
chr1	74949653	74951809	ATACpk_peak_394	92	.	4.87753	11.8608	9.28651	2142
chr1	74949542	74950338	ATACpk_peak_394	92	.	4.87753	11.8608	9.28651	2142
chr1	74950602	74951809	ATACpk_peak_394	92	.	4.87753	11.8608	9.28651	2142
chr1	75124654	75125290	ATACpk_peak_395	356	.	10.1303	38.8351	35.6252	507
chr1	75124486	75125461	ATACpk_peak_395	356	.	10.1303	38.8351	35.6252	507
chr1	75124591	75125404	ATACpk_peak_395	356	.	10.1303	38.8351	35.6252	507
chr1	75141353	75143217	ATACpk_peak_396	292	.	9.00468	32.3804	29.2928	1270
chr1	75141353	75143273	ATACpk_peak_396	292	.	9.00468	32.3804	29.2928	1270
chr1	75141353	75143457	ATACpk_peak_396	292	.	9.00468	32.3804	29.2928	1270
chr1	75167994	75169240	ATACpk_peak_397	445	.	11.631	47.882	44.5182	821
chr1	75167853	75169204	ATACpk_peak_397	445	.	11.631	47.882	44.5182	821
chr1	75168077	75169240	ATACpk_peak_397	445	.	11.631	47.882	44.5182	821
chr1	75179716	75180631	ATACpk_peak_398	213	.	7.5039	24.2823	21.367	546
chr1	75179852	75180631	ATACpk_peak_398	213	.	7.5039	24.2823	21.367	546
chr1	75179862	75180631	ATACpk_peak_398	213	.	7.5039	24.2823	21.367	546
chr1	75191096	75192973	ATACpk_peak_399	599	.	14.0698	63.5091	59.9166	964
chr1	75191298	75192973	ATACpk_peak_399	599	.	14.0698	63.5091	59.9166	964
chr1	75191249	75192675	ATACpk_peak_399	599	.	14.0698	63.5091	59.9166	964
chr1	75210367	75211231	ATACpk_peak_401	292	.	9.00468	32.3804	29.2928	439
chr1	75210359	75211384	ATACpk_peak_401	292	.	9.00468	32.3804	29.2928	439
chr1	75210525	75211076	ATACpk_peak_401	292	.	9.00468	32.3804	29.2928	439
chr1	75215879	75216317	ATACpk_peak_402	44	.	3.56435	6.76701	4.42147	283
chr1	75217028	75217311	ATACpk_peak_403	16	.	2.62636	3.7656	1.65632	54
chr1	75219856	75220088	ATACpk_peak_404	85	.	4.68994	11.0793	8.53295	1007
chr1	75217651	75219576	ATACpk_peak_404	85	.	4.68994	11.0793	8.53295	1007
chr1	75217937	75219743	ATACpk_peak_404	85	.	4.68994	11.0793	8.53295	1007
chr1	75218401	75219273	ATACpk_peak_404	85	.	4.68994	11.0793	8.53295	1007
chr1	75231376	75232237	ATACpk_peak_405	57	.	3.93955	8.12754	5.70762	746
chr1	75231376	75232237	ATACpk_peak_405	57	.	3.93955	8.12754	5.70762	746
chr1	75231888	75232237	ATACpk_peak_405	57	.	3.93955	8.12754	5.70762	746
chr1	75234636	75234962	ATACpk_peak_407	44	.	3.56435	6.76701	4.42147	224
chr1	75235688	75237051	ATACpk_peak_408	611	.	14.2574	64.7537	61.1451	898
chr1	75235688	75237319	ATACpk_peak_408	611	.	14.2574	64.7537	61.1451	898
chr1	75235688	75237362	ATACpk_peak_408	611	.	14.2574	64.7537	61.1451	898
chr1	75246518	75246876	ATACpk_peak_410	50	.	3.75195	7.43695	5.05349	364
chr1	75246049	75246876	ATACpk_peak_410	50	.	3.75195	7.43695	5.05349	364
chr1	75247279	75247621	ATACpk_peak_411	50	.	3.75195	7.43695	5.05349	213
chr1	75247279	75247621	ATACpk_peak_411	50	.	3.75195	7.43695	5.05349	213
chr1	75247279	75247621	ATACpk_peak_411	50	.	3.75195	7.43695	5.05349	213
chr1	75253852	75254467	ATACpk_peak_412	57	.	3.93955	8.12754	5.70762	329
chr1	75253852	75254392	ATACpk_peak_412	57	.	3.93955	8.12754	5.70762	329
chr1	75253852	75254467	ATACpk_peak_412	57	.	3.93955	8.12754	5.70762	329
chr1	75316791	75318321	ATACpk_peak_413	1004	.	19.8853	104.448	100.424	813
chr1	75316791	75318341	ATACpk_peak_413	1004	.	19.8853	104.448	100.424	813
chr1	75316948	75318341	ATACpk_peak_413	1004	.	19.8853	104.448	100.424	813
chr1	75369550	75370223	ATACpk_peak_414	85	.	4.68994	11.0793	8.53295	106
chr1	75369594	75369936	ATACpk_peak_414	85	.	4.68994	11.0793	8.53295	106
chr1	75435688	75436093	ATACpk_peak_415	44	.	3.56435	6.76701	4.42147	309
chr1	75435688	75436063	ATACpk_peak_415	44	.	3.56435	6.76701	4.42147	309
chr1	75435688	75435991	ATACpk_peak_415	44	.	3.56435	6.76701	4.42147	309
chr1	75445923	75447156	ATACpk_peak_416	57	.	3.93955	8.12754	5.70762	129
chr1	75445923	75446991	ATACpk_peak_416	57	.	3.93955	8.12754	5.70762	129
chr1	75460760	75462567	ATACpk_peak_417	167	.	6.56591	19.5605	16.7585	413
chr1	75460669	75462439	ATACpk_peak_417	167	.	6.56591	19.5605	16.7585	413
chr1	75460779	75462304	ATACpk_peak_417	167	.	6.56591	19.5605	16.7585	413
chr1	75478777	75479852	ATACpk_peak_419	661	.	15.0078	69.7881	66.117	695
chr1	75478777	75479838	ATACpk_peak_419	661	.	15.0078	69.7881	66.117	695
chr1	75478777	75479922	ATACpk_peak_419	661	.	15.0078	69.7881	66.117	695
chr1	75505688	75506678	ATACpk_peak_420	57	.	3.93955	8.12754	5.70762	307
chr1	75505688	75506447	ATACpk_peak_420	57	.	3.93955	8.12754	5.70762	307
chr1	75505688	75506339	ATACpk_peak_420	57	.	3.93955	8.12754	5.70762	307
chr1	75507240	75507357	ATACpk_peak_421	38	.	3.37675	6.11872	3.81342	135
chr1	75521263	75522008	ATACpk_peak_422	141	.	6.00312	16.8707	14.1409	305
chr1	75521250	75522008	ATACpk_peak_422	141	.	6.00312	16.8707	14.1409	305
chr1	75521269	75522008	ATACpk_peak_422	141	.	6.00312	16.8707	14.1409	305
chr1	75559624	75559709	ATACpk_peak_423	44	.	3.56435	6.76701	4.42147	432
chr1	75559309	75559709	ATACpk_peak_423	44	.	3.56435	6.76701	4.42147	432
chr1	75559510	75559709	ATACpk_peak_423	44	.	3.56435	6.76701	4.42147	432
chr1	75713891	75715317	ATACpk_peak_424	185	.	6.94111	21.415	18.5672	889
chr1	75713853	75715340	ATACpk_peak_424	185	.	6.94111	21.415	18.5672	889
chr1	75713891	75715225	ATACpk_peak_424	185	.	6.94111	21.415	18.5672	889
chr1	77515175	77515403	ATACpk_peak_425	21	.	2.81396	4.31522	2.14996	326
chr1	78310157	78311059	ATACpk_peak_426	242	.	8.06669	27.2456	24.263	241
chr1	78310157	78311072	ATACpk_peak_426	242	.	8.06669	27.2456	24.263	241
chr1	78310212	78311094	ATACpk_peak_426	242	.	8.06669	27.2456	24.263	241
chr1	78488617	78489368	ATACpk_peak_428	176	.	6.75351	20.4818	17.6567	508
chr1	78488521	78489368	ATACpk_peak_428	176	.	6.75351	20.4818	17.6567	508
chr1	78488648	78489368	ATACpk_peak_428	176	.	6.75351	20.4818	17.6567	508
chr1	78657446	78658637	ATACpk_peak_430	881	.	18.197	92.0995	88.1846	422
chr1	78657446	78658576	ATACpk_peak_430	881	.	18.197	92.0995	88.1846	422
chr1	78657446	78658642	ATACpk_peak_430	881	.	18.197	92.0995	88.1846	422
chr1	78785168	78786149	ATACpk_peak_431	150	.	6.19072	17.7546	15.0004	67
chr1	78785192	78786149	ATACpk_peak_431	150	.	6.19072	17.7546	15.0004	67
chr1	78785168	78786149	ATACpk_peak_431	150	.	6.19072	17.7546	15.0004	67
chr1	79761128	79761865	ATACpk_peak_433	100	.	5.06513	12.6585	10.057	544
chr1	79761128	79761839	ATACpk_peak_433	100	.	5.06513	12.6585	10.057	544
chr1	79761128	79761865	ATACpk_peak_433	100	.	5.06513	12.6585	10.057	544
chr1	79775960	79776344	ATACpk_peak_434	63	.	4.12714	8.83787	6.38376	70
chr1	79775960	79776344	ATACpk_peak_434	63	.	4.12714	8.83787	6.38376	70
chr1	79775966	79776339	ATACpk_peak_434	63	.	4.12714	8.83787	6.38376	70
chr1	80340027	80340261	ATACpk_peak_435	44	.	3.56435	6.76701	4.42147	122
chr1	80340024	80340261	ATACpk_peak_435	44	.	3.56435	6.76701	4.42147	122
chr1	80340587	80341281	ATACpk_peak_436	223	.	7.6915	25.2597	22.3218	321
chr1	80340587	80341281	ATACpk_peak_436	223	.	7.6915	25.2597	22.3218	321
chr1	80340587	80341155	ATACpk_peak_436	223	.	7.6915	25.2597	22.3218	321
chr1	81692136	81693375	ATACpk_peak_437	63	.	4.12714	8.83787	6.38376	402
chr1	81691930	81693380	ATACpk_peak_437	63	.	4.12714	8.83787	6.38376	402
chr1	81692048	81693380	ATACpk_peak_437	63	.	4.12714	8.83787	6.38376	402
chr1	81709807	81710609	ATACpk_peak_438	38	.	3.37675	6.11872	3.81342	75
chr1	81709807	81710609	ATACpk_peak_438	38	.	3.37675	6.11872	3.81342	75
chr1	81710348	81710609	ATACpk_peak_438	38	.	3.37675	6.11872	3.81342	75
chr1	82283179	82283548	ATACpk_peak_439	141	.	6.00312	16.8707	14.1409	251
chr1	82283179	82283548	ATACpk_peak_439	141	.	6.00312	16.8707	14.1409	251
chr1	82283295	82283548	ATACpk_peak_439	141	.	6.00312	16.8707	14.1409	251
chr1	82316277	82317012	ATACpk_peak_440	324	.	9.56747	35.5699	32.4211	261
chr1	82316277	82317012	ATACpk_peak_440	324	.	9.56747	35.5699	32.4211	261
chr1	82316277	82317012	ATACpk_peak_440	324	.	9.56747	35.5699	32.4211	261
chr1	82477444	82477961	ATACpk_peak_441	100	.	5.06513	12.6585	10.057	315
chr1	82477436	82477961	ATACpk_peak_441	100	.	5.06513	12.6585	10.057	315
chr1	82477496	82477953	ATACpk_peak_441	100	.	5.06513	12.6585	10.057	315
chr1	82724758	82725196	ATACpk_peak_442	124	.	5.62792	15.1431	12.4635	87
chr1	82724751	82725196	ATACpk_peak_442	124	.	5.62792	15.1431	12.4635	87
chr1	82724775	82725191	ATACpk_peak_442	124	.	5.62792	15.1431	12.4635	87
chr1	82830783	82830788	ATACpk_peak_443	26	.	3.00156	4.89156	2.67543	293
chr1	82838924	82840146	ATACpk_peak_444	313	.	9.37987	34.4981	31.3698	555
chr1	82838924	82840146	ATACpk_peak_444	313	.	9.37987	34.4981	31.3698	555
chr1	82838924	82840136	ATACpk_peak_444	313	.	9.37987	34.4981	31.3698	555
chr1	83138046	83138945	ATACpk_peak_445	50	.	3.75195	7.43695	5.05349	594
chr1	83138046	83138945	ATACpk_peak_445	50	.	3.75195	7.43695	5.05349	594
chr1	83138636	83138945	ATACpk_peak_445	50	.	3.75195	7.43695	5.05349	594
chr1	83159674	83159983	ATACpk_peak_446	116	.	5.44033	14.3002	11.646	28
chr1	83277101	83277312	ATACpk_peak_447	50	.	3.75195	7.43695	5.05349	1097
chr1	83277180	83277312	ATACpk_peak_447	50	.	3.75195	7.43695	5.05349	1097
chr1	84225899	84226880	ATACpk_peak_448	232	.	7.87909	26.2476	23.2872	457
chr1	84225873	84226934	ATACpk_peak_448	232	.	7.87909	26.2476	23.2872	457
chr1	84226075	84226904	ATACpk_peak_448	232	.	7.87909	26.2476	23.2872	457
chr1	84263887	84264220	ATACpk_peak_449	85	.	4.68994	11.0793	8.53295	243
chr1	84263842	84264468	ATACpk_peak_449	85	.	4.68994	11.0793	8.53295	243
chr1	84718711	84718948	ATACpk_peak_450	38	.	3.37675	6.11872	3.81342	268
chr1	84837786	84840504	ATACpk_peak_451	526	.	12.9442	56.1648	52.6745	1680
chr1	84837786	84840572	ATACpk_peak_451	526	.	12.9442	56.1648	52.6745	1680
chr1	84837786	84840777	ATACpk_peak_451	526	.	12.9442	56.1648	52.6745	1680
chr1	84881232	84882144	ATACpk_peak_452	50	.	3.75195	7.43695	5.05349	226
chr1	84881232	84882144	ATACpk_peak_452	50	.	3.75195	7.43695	5.05349	226
chr1	84881387	84881837	ATACpk_peak_452	50	.	3.75195	7.43695	5.05349	226
chr1	85703327	85704039	ATACpk_peak_591	185	.	6.94111	21.415	18.5672	537
chr1	85703327	85704039	ATACpk_peak_591	185	.	6.94111	21.415	18.5672	537
chr1	85703216	85704039	ATACpk_peak_591	185	.	6.94111	21.415	18.5672	537
chr1	85793188	85794448	ATACpk_peak_592	282	.	8.81708	31.3349	28.2675	356
chr1	85793188	85794407	ATACpk_peak_592	282	.	8.81708	31.3349	28.2675	356
chr1	85793188	85794448	ATACpk_peak_592	282	.	8.81708	31.3349	28.2675	356
chr1	85820780	85822243	ATACpk_peak_593	141	.	6.00312	16.8707	14.1409	698
chr1	85820780	85822243	ATACpk_peak_593	141	.	6.00312	16.8707	14.1409	698
chr1	85820780	85821962	ATACpk_peak_593	141	.	6.00312	16.8707	14.1409	698
chr1	85899088	85899112	ATACpk_peak_594	44	.	3.56435	6.76701	4.42147	575
chr1	85898732	85899112	ATACpk_peak_594	44	.	3.56435	6.76701	4.42147	575
chr1	85928478	85929012	ATACpk_peak_595	44	.	3.56435	6.76701	4.42147	569
chr1	85933866	85934152	ATACpk_peak_596	21	.	2.81396	4.31522	2.14996	145
chr1	85933866	85934152	ATACpk_peak_596	21	.	2.81396	4.31522	2.14996	145
chr1	86045929	86046475	ATACpk_peak_597	262	.	8.44189	29.2712	26.2456	304
chr1	86045894	86046529	ATACpk_peak_597	262	.	8.44189	29.2712	26.2456	304
chr1	86045901	86046482	ATACpk_peak_597	262	.	8.44189	29.2712	26.2456	304
chr1	86064163	86065063	ATACpk_peak_598	345	.	9.94267	37.7386	34.549	708
chr1	86063954	86065229	ATACpk_peak_598	345	.	9.94267	37.7386	34.549	708
chr1	86063954	86065227	ATACpk_peak_598	345	.	9.94267	37.7386	34.549	708
chr1	86154089	86155181	ATACpk_peak_599	468	.	12.0062	50.2154	46.8149	770
chr1	86154045	86155291	ATACpk_peak_599	468	.	12.0062	50.2154	46.8149	770
chr1	86154096	86155023	ATACpk_peak_599	468	.	12.0062	50.2154	46.8149	770
chr1	86358667	86360275	ATACpk_peak_601	562	.	13.507	59.81	56.2679	832
chr1	86358667	86360275	ATACpk_peak_601	562	.	13.507	59.81	56.2679	832
chr1	86358667	86360128	ATACpk_peak_601	562	.	13.507	59.81	56.2679	832
chr1	86433788	86434972	ATACpk_peak_603	292	.	9.00468	32.3804	29.2928	726
chr1	86434179	86434956	ATACpk_peak_603	292	.	9.00468	32.3804	29.2928	726
chr1	86433994	86434972	ATACpk_peak_603	292	.	9.00468	32.3804	29.2928	726
chr1	86439569	86442792	ATACpk_peak_604	167	.	6.56591	19.5605	16.7585	1005
chr1	86439569	86442792	ATACpk_peak_604	167	.	6.56591	19.5605	16.7585	1005
chr1	86439569	86442677	ATACpk_peak_604	167	.	6.56591	19.5605	16.7585	1005
chr1	86467052	86467888	ATACpk_peak_605	100	.	5.06513	12.6585	10.057	552
chr1	86467052	86467880	ATACpk_peak_605	100	.	5.06513	12.6585	10.057	552
chr1	86467262	86467666	ATACpk_peak_605	100	.	5.06513	12.6585	10.057	552
chr1	86486144	86488478	ATACpk_peak_607	815	.	17.259	85.3927	81.5446	1359
chr1	86486452	86488186	ATACpk_peak_607	815	.	17.259	85.3927	81.5446	1359
chr1	86486885	86488149	ATACpk_peak_607	815	.	17.259	85.3927	81.5446	1359
chr1	86503264	86504755	ATACpk_peak_608	411	.	11.0682	44.4342	41.1261	820
chr1	86503342	86505162	ATACpk_peak_608	411	.	11.0682	44.4342	41.1261	820
chr1	86503294	86504836	ATACpk_peak_608	411	.	11.0682	44.4342	41.1261	820
chr1	86524292	86528512	ATACpk_peak_609	737	.	16.1334	77.5001	73.7383	2342
chr1	86524292	86528512	ATACpk_peak_609	737	.	16.1334	77.5001	73.7383	2342
chr1	86524292	86528512	ATACpk_peak_609	737	.	16.1334	77.5001	73.7383	2342
chr1	86581970	86582944	ATACpk_peak_610	445	.	11.631	47.882	44.5182	632
chr1	86581970	86583076	ATACpk_peak_610	445	.	11.631	47.882	44.5182	632
chr1	86581970	86582976	ATACpk_peak_610	445	.	11.631	47.882	44.5182	632
chr1	86703473	86704161	ATACpk_peak_611	158	.	6.37831	18.6513	15.8732	350
chr1	86703473	86704161	ATACpk_peak_611	158	.	6.37831	18.6513	15.8732	350
chr1	86703473	86704151	ATACpk_peak_611	158	.	6.37831	18.6513	15.8732	350
chr1	86892660	86892724	ATACpk_peak_612	38	.	3.37675	6.11872	3.81342	113
chr1	87098714	87098880	ATACpk_peak_613	132	.	5.81552	16	13.295	299
chr1	87098669	87098880	ATACpk_peak_613	132	.	5.81552	16	13.295	299
chr1	87149251	87150199	ATACpk_peak_614	367	.	10.3179	39.9396	36.7101	428
chr1	87149251	87150199	ATACpk_peak_614	367	.	10.3179	39.9396	36.7101	428
chr1	87149251	87150199	ATACpk_peak_614	367	.	10.3179	39.9396	36.7101	428
chr1	87153838	87154922	ATACpk_peak_615	108	.	5.25273	13.4718	10.8435	776
chr1	87153838	87154871	ATACpk_peak_615	108	.	5.25273	13.4718	10.8435	776
chr1	87154108	87154689	ATACpk_peak_615	108	.	5.25273	13.4718	10.8435	776
chr1	87182895	87183786	ATACpk_peak_616	77	.	4.50234	10.3145	7.79751	392
chr1	87183073	87183786	ATACpk_peak_616	77	.	4.50234	10.3145	7.79751	392
chr1	87182895	87183738	ATACpk_peak_616	77	.	4.50234	10.3145	7.79751	392
chr1	87184644	87187507	ATACpk_peak_617	124	.	5.62792	15.1431	12.4635	2236
chr1	87184633	87187502	ATACpk_peak_617	124	.	5.62792	15.1431	12.4635	2236
chr1	87184755	87185021	ATACpk_peak_617	124	.	5.62792	15.1431	12.4635	2236
chr1	87185588	87187772	ATACpk_peak_617	124	.	5.62792	15.1431	12.4635	2236
chr1	87213462	87214420	ATACpk_peak_618	356	.	10.1303	38.8351	35.6252	471
chr1	87213524	87214527	ATACpk_peak_618	356	.	10.1303	38.8351	35.6252	471
chr1	87213654	87214523	ATACpk_peak_618	356	.	10.1303	38.8351	35.6252	471
chr1	87258566	87258818	ATACpk_peak_619	44	.	3.56435	6.76701	4.42147	54
chr1	87258566	87258807	ATACpk_peak_619	44	.	3.56435	6.76701	4.42147	54
chr1	87262491	87262607	ATACpk_peak_620	57	.	3.93955	8.12754	5.70762	66
chr1	87263274	87265033	ATACpk_peak_621	303	.	9.19228	33.4349	30.3268	978
chr1	87263274	87265033	ATACpk_peak_621	303	.	9.19228	33.4349	30.3268	978
chr1	87263279	87264830	ATACpk_peak_621	303	.	9.19228	33.4349	30.3268	978
chr1	87326761	87327677	ATACpk_peak_623	400	.	10.8807	43.2993	40.0106	285
chr1	87326789	87327664	ATACpk_peak_623	400	.	10.8807	43.2993	40.0106	285
chr1	87326761	87327688	ATACpk_peak_623	400	.	10.8807	43.2993	40.0106	285
chr1	87509954	87510576	ATACpk_peak_624	92	.	4.87753	11.8608	9.28651	729
chr1	87510024	87510498	ATACpk_peak_624	92	.	4.87753	11.8608	9.28651	729
chr1	87509812	87510572	ATACpk_peak_624	92	.	4.87753	11.8608	9.28651	729
chr1	87550690	87551307	ATACpk_peak_625	100	.	5.06513	12.6585	10.057	771
chr1	87550568	87551307	ATACpk_peak_625	100	.	5.06513	12.6585	10.057	771
chr1	87550277	87551307	ATACpk_peak_625	100	.	5.06513	12.6585	10.057	771
chr1	87611785	87612111	ATACpk_peak_626	32	.	3.18916	5.49317	3.23067	28
chr1	87620167	87620995	ATACpk_peak_627	132	.	5.81552	16	13.295	860
chr1	87619733	87621258	ATACpk_peak_627	132	.	5.81552	16	13.295	860
chr1	87620021	87620834	ATACpk_peak_627	132	.	5.81552	16	13.295	860
chr1	87755870	87756410	ATACpk_peak_628	141	.	6.00312	16.8707	14.1409	115
chr1	87755870	87756449	ATACpk_peak_628	141	.	6.00312	16.8707	14.1409	115
chr1	87755878	87756449	ATACpk_peak_628	141	.	6.00312	16.8707	14.1409	115
chr1	87852593	87854030	ATACpk_peak_629	367	.	10.3179	39.9396	36.7101	930
chr1	87852573	87854030	ATACpk_peak_629	367	.	10.3179	39.9396	36.7101	930
chr1	87852573	87854030	ATACpk_peak_629	367	.	10.3179	39.9396	36.7101	930
chr1	88008165	88008622	ATACpk_peak_630	77	.	4.50234	10.3145	7.79751	188
chr1	88008165	88008567	ATACpk_peak_630	77	.	4.50234	10.3145	7.79751	188
chr1	88008222	88008622	ATACpk_peak_630	77	.	4.50234	10.3145	7.79751	188
chr1	88205252	88206088	ATACpk_peak_631	468	.	12.0062	50.2154	46.8149	510
chr1	88205252	88206051	ATACpk_peak_631	468	.	12.0062	50.2154	46.8149	510
chr1	88205252	88205920	ATACpk_peak_631	468	.	12.0062	50.2154	46.8149	510
chr1	88701929	88702658	ATACpk_peak_648	124	.	5.62792	15.1431	12.4635	389
chr1	88701929	88702461	ATACpk_peak_648	124	.	5.62792	15.1431	12.4635	389
chr1	88701929	88702658	ATACpk_peak_648	124	.	5.62792	15.1431	12.4635	389
chr1	88705856	88706418	ATACpk_peak_649	92	.	4.87753	11.8608	9.28651	130
chr1	88705856	88706314	ATACpk_peak_649	92	.	4.87753	11.8608	9.28651	130
chr1	88705856	88706314	ATACpk_peak_649	92	.	4.87753	11.8608	9.28651	130
chr1	89016026	89016341	ATACpk_peak_650	38	.	3.37675	6.11872	3.81342	415
chr1	89070131	89070666	ATACpk_peak_651	124	.	5.62792	15.1431	12.4635	308
chr1	89070076	89070666	ATACpk_peak_651	124	.	5.62792	15.1431	12.4635	308
chr1	89070076	89070666	ATACpk_peak_651	124	.	5.62792	15.1431	12.4635	308
chr1	89264658	89265035	ATACpk_peak_652	21	.	2.81396	4.31522	2.14996	200
chr1	89453715	89455605	ATACpk_peak_653	367	.	10.3179	39.9396	36.7101	1052
chr1	89453827	89455601	ATACpk_peak_653	367	.	10.3179	39.9396	36.7101	1052
chr1	89453844	89455326	ATACpk_peak_653	367	.	10.3179	39.9396	36.7101	1052
chr1	89502528	89503192	ATACpk_peak_654	38	.	3.37675	6.11872	3.81342	303
chr1	89502695	89503192	ATACpk_peak_654	38	.	3.37675	6.11872	3.81342	303
chr1	89502528	89502865	ATACpk_peak_654	38	.	3.37675	6.11872	3.81342	303
chr1	89580058	89581219	ATACpk_peak_655	132	.	5.81552	16	13.295	464
chr1	89580081	89581219	ATACpk_peak_655	132	.	5.81552	16	13.295	464
chr1	89580211	89581219	ATACpk_peak_655	132	.	5.81552	16	13.295	464
chr1	89968260	89968954	ATACpk_peak_656	116	.	5.44033	14.3002	11.646	291
chr1	89968260	89968696	ATACpk_peak_656	116	.	5.44033	14.3002	11.646	291
chr1	89968260	89968715	ATACpk_peak_656	116	.	5.44033	14.3002	11.646	291
chr1	90153232	90153597	ATACpk_peak_657	70	.	4.31474	9.56711	7.0808	262
chr1	90153358	90153597	ATACpk_peak_657	70	.	4.31474	9.56711	7.0808	262
chr1	90445745	90448573	ATACpk_peak_658	324	.	9.56747	35.5699	32.4211	1053
chr1	90445745	90448505	ATACpk_peak_658	324	.	9.56747	35.5699	32.4211	1053
chr1	90445953	90448385	ATACpk_peak_658	324	.	9.56747	35.5699	32.4211	1053
chr1	90603089	90603639	ATACpk_peak_659	232	.	7.87909	26.2476	23.2872	273
chr1	90603089	90603639	ATACpk_peak_659	232	.	7.87909	26.2476	23.2872	273
chr1	90603162	90603639	ATACpk_peak_659	232	.	7.87909	26.2476	23.2872	273
chr1	90735736	90736627	ATACpk_peak_660	124	.	5.62792	15.1431	12.4635	290
chr1	90735788	90736600	ATACpk_peak_660	124	.	5.62792	15.1431	12.4635	290
chr1	90735741	90736578	ATACpk_peak_660	124	.	5.62792	15.1431	12.4635	290
chr1	91144471	91145417	ATACpk_peak_662	456	.	11.8186	49.0453	45.6633	538
chr1	91144471	91145418	ATACpk_peak_662	456	.	11.8186	49.0453	45.6633	538
chr1	91144471	91145418	ATACpk_peak_662	456	.	11.8186	49.0453	45.6633	538
chr1	91249745	91250899	ATACpk_peak_663	411	.	11.0682	44.4342	41.1261	470
chr1	91249912	91250829	ATACpk_peak_663	411	.	11.0682	44.4342	41.1261	470
chr1	91250047	91251051	ATACpk_peak_663	411	.	11.0682	44.4342	41.1261	470
chr1	91297503	91298754	ATACpk_peak_664	479	.	12.1938	51.3923	47.9733	765
chr1	91297672	91298754	ATACpk_peak_664	479	.	12.1938	51.3923	47.9733	765
chr1	91297672	91298752	ATACpk_peak_664	479	.	12.1938	51.3923	47.9733	765
chr1	91366063	91366987	ATACpk_peak_666	70	.	4.31474	9.56711	7.0808	366
chr1	91366329	91366748	ATACpk_peak_666	70	.	4.31474	9.56711	7.0808	366
chr1	91366329	91366639	ATACpk_peak_666	70	.	4.31474	9.56711	7.0808	366
chr1	91398308	91399230	ATACpk_peak_667	272	.	8.62948	30.2984	27.2518	431
chr1	91398407	91399472	ATACpk_peak_667	272	.	8.62948	30.2984	27.2518	431
chr1	91398308	91399472	ATACpk_peak_667	272	.	8.62948	30.2984	27.2518	431
chr1	91399865	91400332	ATACpk_peak_668	26	.	3.00156	4.89156	2.67543	434
chr1	91399865	91400097	ATACpk_peak_668	26	.	3.00156	4.89156	2.67543	434
chr1	91399865	91400332	ATACpk_peak_668	26	.	3.00156	4.89156	2.67543	434
chr1	91400832	91406235	ATACpk_peak_669	313	.	9.37987	34.4981	31.3698	1992
chr1	91400832	91404933	ATACpk_peak_669	313	.	9.37987	34.4981	31.3698	1992
chr1	91405504	91406230	ATACpk_peak_669	313	.	9.37987	34.4981	31.3698	1992
chr1	91400832	91406294	ATACpk_peak_669	313	.	9.37987	34.4981	31.3698	1992
chr1	91411572	91413804	ATACpk_peak_670	456	.	11.8186	49.0453	45.6633	1710
chr1	91411572	91413804	ATACpk_peak_670	456	.	11.8186	49.0453	45.6633	1710
chr1	91411966	91413804	ATACpk_peak_670	456	.	11.8186	49.0453	45.6633	1710
chr1	91422217	91422551	ATACpk_peak_671	44	.	3.56435	6.76701	4.42147	106
chr1	91422217	91422551	ATACpk_peak_671	44	.	3.56435	6.76701	4.42147	106
chr1	91422217	91422551	ATACpk_peak_671	44	.	3.56435	6.76701	4.42147	106
chr1	91458815	91460244	ATACpk_peak_672	881	.	18.197	92.0995	88.1846	679
chr1	91458815	91460244	ATACpk_peak_672	881	.	18.197	92.0995	88.1846	679
chr1	91458815	91460244	ATACpk_peak_672	881	.	18.197	92.0995	88.1846	679
chr1	91493894	91495432	ATACpk_peak_673	636	.	14.6326	67.2598	63.6192	767
chr1	91493894	91495453	ATACpk_peak_673	636	.	14.6326	67.2598	63.6192	767
chr1	91494088	91495453	ATACpk_peak_673	636	.	14.6326	67.2598	63.6192	767
chr1	91533844	91534497	ATACpk_peak_674	50	.	3.75195	7.43695	5.05349	338
chr1	91533844	91534644	ATACpk_peak_674	50	.	3.75195	7.43695	5.05349	338
chr1	91536135	91536599	ATACpk_peak_675	21	.	2.81396	4.31522	2.14996	244
chr1	91536337	91536688	ATACpk_peak_675	21	.	2.81396	4.31522	2.14996	244
chr1	91536135	91536721	ATACpk_peak_675	21	.	2.81396	4.31522	2.14996	244
chr1	91539424	91541319	ATACpk_peak_676	538	.	13.1318	57.3737	53.8659	1030
chr1	91539424	91541274	ATACpk_peak_676	538	.	13.1318	57.3737	53.8659	1030
chr1	91539729	91541312	ATACpk_peak_676	538	.	13.1318	57.3737	53.8659	1030
chr1	91561074	91561622	ATACpk_peak_677	32	.	3.18916	5.49317	3.23067	545
chr1	91560910	91561622	ATACpk_peak_677	32	.	3.18916	5.49317	3.23067	545
chr1	91561134	91561413	ATACpk_peak_677	32	.	3.18916	5.49317	3.23067	545
chr1	91770728	91771059	ATACpk_peak_678	63	.	4.12714	8.83787	6.38376	388
chr1	91770717	91771127	ATACpk_peak_678	63	.	4.12714	8.83787	6.38376	388
chr1	91801942	91802215	ATACpk_peak_679	26	.	3.00156	4.89156	2.67543	215
chr1	92180130	92181091	ATACpk_peak_680	1004	.	19.8853	104.448	100.424	435
chr1	92180130	92181091	ATACpk_peak_680	1004	.	19.8853	104.448	100.424	435
chr1	92180130	92181091	ATACpk_peak_680	1004	.	19.8853	104.448	100.424	435
chr1	92352624	92352886	ATACpk_peak_681	32	.	3.18916	5.49317	3.23067	78
chr1	92473545	92474264	ATACpk_peak_682	242	.	8.06669	27.2456	24.263	380
chr1	92473451	92474264	ATACpk_peak_682	242	.	8.06669	27.2456	24.263	380
chr1	92473451	92474264	ATACpk_peak_682	242	.	8.06669	27.2456	24.263	380
chr1	92641431	92642242	ATACpk_peak_683	176	.	6.75351	20.4818	17.6567	584
chr1	92641715	92642392	ATACpk_peak_683	176	.	6.75351	20.4818	17.6567	584
chr1	92641714	92642039	ATACpk_peak_683	176	.	6.75351	20.4818	17.6567	584
chr1	92647975	92648886	ATACpk_peak_684	50	.	3.75195	7.43695	5.05349	906
chr1	92647975	92648984	ATACpk_peak_684	50	.	3.75195	7.43695	5.05349	906
chr1	92696743	92696982	ATACpk_peak_685	32	.	3.18916	5.49317	3.23067	135
chr1	92696532	92696982	ATACpk_peak_685	32	.	3.18916	5.49317	3.23067	135
chr1	92831109	92832294	ATACpk_peak_686	232	.	7.87909	26.2476	23.2872	536
chr1	92831109	92832537	ATACpk_peak_686	232	.	7.87909	26.2476	23.2872	536
chr1	92831233	92832396	ATACpk_peak_686	232	.	7.87909	26.2476	23.2872	536
chr1	92902919	92903205	ATACpk_peak_688	70	.	4.31474	9.56711	7.0808	55
chr1	92902919	92903205	ATACpk_peak_688	70	.	4.31474	9.56711	7.0808	55
chr1	92902919	92903122	ATACpk_peak_688	70	.	4.31474	9.56711	7.0808	55
chr1	92906920	92907663	ATACpk_peak_689	232	.	7.87909	26.2476	23.2872	514
chr1	92906906	92907725	ATACpk_peak_689	232	.	7.87909	26.2476	23.2872	514
chr1	92906906	92907725	ATACpk_peak_689	232	.	7.87909	26.2476	23.2872	514
chr1	92910729	92911412	ATACpk_peak_690	77	.	4.50234	10.3145	7.79751	425
chr1	92910714	92911871	ATACpk_peak_690	77	.	4.50234	10.3145	7.79751	425
chr1	92910764	92911412	ATACpk_peak_690	77	.	4.50234	10.3145	7.79751	425
chr1	92934305	92935073	ATACpk_peak_692	242	.	8.06669	27.2456	24.263	330
chr1	92934305	92934961	ATACpk_peak_692	242	.	8.06669	27.2456	24.263	330
chr1	92934305	92935073	ATACpk_peak_692	242	.	8.06669	27.2456	24.263	330
chr1	92991205	92993856	ATACpk_peak_694	242	.	8.06669	27.2456	24.263	5926
chr1	92996179	92997807	ATACpk_peak_694	242	.	8.06669	27.2456	24.263	5926
chr1	92994232	92997982	ATACpk_peak_694	242	.	8.06669	27.2456	24.263	5926
chr1	92991205	92997982	ATACpk_peak_694	242	.	8.06669	27.2456	24.263	5926
chr1	92991205	92995741	ATACpk_peak_694	242	.	8.06669	27.2456	24.263	5926
chr1	92999190	92999298	ATACpk_peak_695	21	.	2.81396	4.31522	2.14996	439
chr1	92999190	92999715	ATACpk_peak_695	21	.	2.81396	4.31522	2.14996	439
chr1	93115166	93115530	ATACpk_peak_696	141	.	6.00312	16.8707	14.1409	122
chr1	93115166	93115586	ATACpk_peak_696	141	.	6.00312	16.8707	14.1409	122
chr1	93115166	93115636	ATACpk_peak_696	141	.	6.00312	16.8707	14.1409	122
chr1	93235805	93236959	ATACpk_peak_697	116	.	5.44033	14.3002	11.646	1000
chr1	93235606	93236744	ATACpk_peak_697	116	.	5.44033	14.3002	11.646	1000
chr1	93235764	93236574	ATACpk_peak_697	116	.	5.44033	14.3002	11.646	1000
chr1	93305637	93306350	ATACpk_peak_698	158	.	6.37831	18.6513	15.8732	269
chr1	93305637	93306380	ATACpk_peak_698	158	.	6.37831	18.6513	15.8732	269
chr1	93305637	93306137	ATACpk_peak_698	158	.	6.37831	18.6513	15.8732	269
chr1	93342502	93344212	ATACpk_peak_699	908	.	18.5721	94.8136	90.8733	993
chr1	93342502	93344212	ATACpk_peak_699	908	.	18.5721	94.8136	90.8733	993
chr1	93342537	93344212	ATACpk_peak_699	908	.	18.5721	94.8136	90.8733	993
chr1	93445138	93446203	ATACpk_peak_700	176	.	6.75351	20.4818	17.6567	257
chr1	93445098	93446203	ATACpk_peak_700	176	.	6.75351	20.4818	17.6567	257
chr1	93445215	93445837	ATACpk_peak_700	176	.	6.75351	20.4818	17.6567	257
chr1	93477975	93479896	ATACpk_peak_701	1572	.	27.2016	161.474	157.234	919
chr1	93477975	93479896	ATACpk_peak_701	1572	.	27.2016	161.474	157.234	919
chr1	93478035	93479896	ATACpk_peak_701	1572	.	27.2016	161.474	157.234	919
chr1	93511558	93512818	ATACpk_peak_702	411	.	11.0682	44.4342	41.1261	486
chr1	93511558	93512696	ATACpk_peak_702	411	.	11.0682	44.4342	41.1261	486
chr1	93511558	93512636	ATACpk_peak_702	411	.	11.0682	44.4342	41.1261	486
chr1	93634711	93636191	ATACpk_peak_705	661	.	15.0078	69.7881	66.117	1084
chr1	93634942	93636159	ATACpk_peak_705	661	.	15.0078	69.7881	66.117	1084
chr1	93634585	93636339	ATACpk_peak_705	661	.	15.0078	69.7881	66.117	1084
chr1	93667836	93669180	ATACpk_peak_706	141	.	6.00312	16.8707	14.1409	1071
chr1	93667836	93669335	ATACpk_peak_706	141	.	6.00312	16.8707	14.1409	1071
chr1	93667836	93667866	ATACpk_peak_706	141	.	6.00312	16.8707	14.1409	1071
chr1	93668841	93669248	ATACpk_peak_706	141	.	6.00312	16.8707	14.1409	1071
chr1	93685705	93686549	ATACpk_peak_707	63	.	4.12714	8.83787	6.38376	408
chr1	93685705	93686655	ATACpk_peak_707	63	.	4.12714	8.83787	6.38376	408
chr1	93715600	93716044	ATACpk_peak_708	44	.	3.56435	6.76701	4.42147	119
chr1	93715871	93716067	ATACpk_peak_708	44	.	3.56435	6.76701	4.42147	119
chr1	93715644	93715970	ATACpk_peak_708	44	.	3.56435	6.76701	4.42147	119
chr1	93754040	93755361	ATACpk_peak_709	503	.	12.569	53.7657	50.3112	814
chr1	93753933	93755361	ATACpk_peak_709	503	.	12.569	53.7657	50.3112	814
chr1	93753933	93755361	ATACpk_peak_709	503	.	12.569	53.7657	50.3112	814
chr1	93801654	93802448	ATACpk_peak_710	252	.	8.25429	28.2535	25.2493	493
chr1	93801553	93802448	ATACpk_peak_710	252	.	8.25429	28.2535	25.2493	493
chr1	93801553	93802448	ATACpk_peak_710	252	.	8.25429	28.2535	25.2493	493
chr1	93803177	93804718	ATACpk_peak_711	586	.	13.8822	62.2702	58.6945	682
chr1	93803177	93804718	ATACpk_peak_711	586	.	13.8822	62.2702	58.6945	682
chr1	93803177	93804521	ATACpk_peak_711	586	.	13.8822	62.2702	58.6945	682
chr1	93825132	93826121	ATACpk_peak_712	132	.	5.81552	16	13.295	613
chr1	93824881	93826121	ATACpk_peak_712	132	.	5.81552	16	13.295	613
chr1	93824881	93826121	ATACpk_peak_712	132	.	5.81552	16	13.295	613
chr1	93944743	93945264	ATACpk_peak_713	38	.	3.37675	6.11872	3.81342	648
chr1	93944535	93945360	ATACpk_peak_713	38	.	3.37675	6.11872	3.81342	648
chr1	93944695	93945392	ATACpk_peak_713	38	.	3.37675	6.11872	3.81342	648
chr1	95313329	95314292	ATACpk_peak_715	185	.	6.94111	21.415	18.5672	338
chr1	95313338	95314351	ATACpk_peak_715	185	.	6.94111	21.415	18.5672	338
chr1	95313479	95314351	ATACpk_peak_715	185	.	6.94111	21.415	18.5672	338
chr1	96997133	96997628	ATACpk_peak_717	32	.	3.18916	5.49317	3.23067	207
chr1	96997138	96997628	ATACpk_peak_717	32	.	3.18916	5.49317	3.23067	207
chr1	96997370	96997628	ATACpk_peak_717	32	.	3.18916	5.49317	3.23067	207
chr1	97162679	97163313	ATACpk_peak_718	150	.	6.19072	17.7546	15.0004	37
chr1	97162702	97163313	ATACpk_peak_718	150	.	6.19072	17.7546	15.0004	37
chr1	97162710	97163052	ATACpk_peak_718	150	.	6.19072	17.7546	15.0004	37
chr1	97346267	97346994	ATACpk_peak_720	116	.	5.44033	14.3002	11.646	101
chr1	97346267	97346749	ATACpk_peak_720	116	.	5.44033	14.3002	11.646	101
chr1	97346267	97346682	ATACpk_peak_720	116	.	5.44033	14.3002	11.646	101
chr1	97660877	97662007	ATACpk_peak_721	85	.	4.68994	11.0793	8.53295	604
chr1	97660873	97661711	ATACpk_peak_721	85	.	4.68994	11.0793	8.53295	604
chr1	97661177	97662041	ATACpk_peak_721	85	.	4.68994	11.0793	8.53295	604
chr1	97769546	97770730	ATACpk_peak_722	292	.	9.00468	32.3804	29.2928	537
chr1	97769584	97770730	ATACpk_peak_722	292	.	9.00468	32.3804	29.2928	537
chr1	97769851	97770432	ATACpk_peak_722	292	.	9.00468	32.3804	29.2928	537
chr1	98095422	98095788	ATACpk_peak_723	38	.	3.37675	6.11872	3.81342	61
chr1	98095422	98095826	ATACpk_peak_723	38	.	3.37675	6.11872	3.81342	61
chr1	98421029	98421573	ATACpk_peak_724	70	.	4.31474	9.56711	7.0808	80
chr1	98421029	98421573	ATACpk_peak_724	70	.	4.31474	9.56711	7.0808	80
chr1	98421029	98421450	ATACpk_peak_724	70	.	4.31474	9.56711	7.0808	80
chr1	99562316	99562565	ATACpk_peak_725	44	.	3.56435	6.76701	4.42147	406
chr1	99562094	99562565	ATACpk_peak_725	44	.	3.56435	6.76701	4.42147	406
chr1	100848169	100848428	ATACpk_peak_726	32	.	3.18916	5.49317	3.23067	27
chr1	101106830	101107428	ATACpk_peak_727	63	.	4.12714	8.83787	6.38376	814
chr1	101105921	101107866	ATACpk_peak_727	63	.	4.12714	8.83787	6.38376	814
chr1	101105148	101106495	ATACpk_peak_727	63	.	4.12714	8.83787	6.38376	814
chr1	101105148	101107866	ATACpk_peak_727	63	.	4.12714	8.83787	6.38376	814
chr1	105019969	105020710	ATACpk_peak_729	77	.	4.50234	10.3145	7.79751	195
chr1	105019969	105020805	ATACpk_peak_729	77	.	4.50234	10.3145	7.79751	195
chr1	105663228	105664366	ATACpk_peak_730	636	.	14.6326	67.2598	63.6192	529
chr1	105663228	105664366	ATACpk_peak_730	636	.	14.6326	67.2598	63.6192	529
chr1	105663228	105664366	ATACpk_peak_730	636	.	14.6326	67.2598	63.6192	529
chr1	105989870	105992265	ATACpk_peak_732	367	.	10.3179	39.9396	36.7101	418
chr1	105989895	105992265	ATACpk_peak_732	367	.	10.3179	39.9396	36.7101	418
chr1	105990057	105992051	ATACpk_peak_732	367	.	10.3179	39.9396	36.7101	418
chr1	105993289	105994080	ATACpk_peak_733	150	.	6.19072	17.7546	15.0004	832
chr1	105993299	105994080	ATACpk_peak_733	150	.	6.19072	17.7546	15.0004	832
chr1	105993208	105994053	ATACpk_peak_733	150	.	6.19072	17.7546	15.0004	832
chr1	106171346	106171949	ATACpk_peak_734	292	.	9.00468	32.3804	29.2928	215
chr1	106171346	106171949	ATACpk_peak_734	292	.	9.00468	32.3804	29.2928	215
chr1	106171346	106171949	ATACpk_peak_734	292	.	9.00468	32.3804	29.2928	215
chr1	106300018	106300357	ATACpk_peak_735	26	.	3.00156	4.89156	2.67543	124
chr1	106300018	106300357	ATACpk_peak_735	26	.	3.00156	4.89156	2.67543	124
chr1	106759598	106760281	ATACpk_peak_736	77	.	4.50234	10.3145	7.79751	244
chr1	106759598	106760232	ATACpk_peak_736	77	.	4.50234	10.3145	7.79751	244
chr1	106759598	106759990	ATACpk_peak_736	77	.	4.50234	10.3145	7.79751	244
chr1	106796288	106797173	ATACpk_peak_737	213	.	7.5039	24.2823	21.367	369
chr1	106796288	106796933	ATACpk_peak_737	213	.	7.5039	24.2823	21.367	369
chr1	106796288	106797194	ATACpk_peak_737	213	.	7.5039	24.2823	21.367	369
chr1	107686779	107687063	ATACpk_peak_738	185	.	6.94111	21.415	18.5672	195
chr1	107686779	107687063	ATACpk_peak_738	185	.	6.94111	21.415	18.5672	195
chr1	107686779	107687063	ATACpk_peak_738	185	.	6.94111	21.415	18.5672	195
chr1	107823064	107823421	ATACpk_peak_739	21	.	2.81396	4.31522	2.14996	263
chr1	109257158	109258630	ATACpk_peak_741	50	.	3.75195	7.43695	5.05349	755
chr1	109257158	109258630	ATACpk_peak_741	50	.	3.75195	7.43695	5.05349	755
chr1	109257395	109258266	ATACpk_peak_741	50	.	3.75195	7.43695	5.05349	755
chr1	111864581	111865062	ATACpk_peak_742	77	.	4.50234	10.3145	7.79751	60
chr1	111864581	111865062	ATACpk_peak_742	77	.	4.50234	10.3145	7.79751	60
chr1	111864581	111865062	ATACpk_peak_742	77	.	4.50234	10.3145	7.79751	60
chr1	113852431	113852782	ATACpk_peak_744	32	.	3.18916	5.49317	3.23067	340
chr1	114182674	114183456	ATACpk_peak_745	50	.	3.75195	7.43695	5.05349	378
chr1	114182561	114183658	ATACpk_peak_745	50	.	3.75195	7.43695	5.05349	378
chr1	114182779	114183658	ATACpk_peak_745	50	.	3.75195	7.43695	5.05349	378
chr1	114808824	114809160	ATACpk_peak_746	63	.	4.12714	8.83787	6.38376	567
chr1	114808600	114808855	ATACpk_peak_746	63	.	4.12714	8.83787	6.38376	567
chr1	115805770	115806067	ATACpk_peak_747	21	.	2.81396	4.31522	2.14996	87
chr1	115805770	115806067	ATACpk_peak_747	21	.	2.81396	4.31522	2.14996	87
chr1	116861632	116862230	ATACpk_peak_749	57	.	3.93955	8.12754	5.70762	179
chr1	116861585	116862230	ATACpk_peak_749	57	.	3.93955	8.12754	5.70762	179
chr1	117253804	117254621	ATACpk_peak_750	77	.	4.50234	10.3145	7.79751	591
chr1	117253720	117254649	ATACpk_peak_750	77	.	4.50234	10.3145	7.79751	591
chr1	117253851	117254535	ATACpk_peak_750	77	.	4.50234	10.3145	7.79751	591
chr1	117375932	117376316	ATACpk_peak_751	21	.	2.81396	4.31522	2.14996	183
chr1	117376082	117376316	ATACpk_peak_751	21	.	2.81396	4.31522	2.14996	183
chr1	117485922	117486222	ATACpk_peak_752	44	.	3.56435	6.76701	4.42147	211
chr1	118311057	118311411	ATACpk_peak_753	77	.	4.50234	10.3145	7.79751	260
chr1	118311057	118311481	ATACpk_peak_753	77	.	4.50234	10.3145	7.79751	260
chr1	118321710	118322263	ATACpk_peak_754	57	.	3.93955	8.12754	5.70762	190
chr1	118321710	118322149	ATACpk_peak_754	57	.	3.93955	8.12754	5.70762	190
chr1	118321710	118322263	ATACpk_peak_754	57	.	3.93955	8.12754	5.70762	190
chr1	118388283	118390310	ATACpk_peak_755	356	.	10.1303	38.8351	35.6252	997
chr1	118388300	118390211	ATACpk_peak_755	356	.	10.1303	38.8351	35.6252	997
chr1	118388283	118390162	ATACpk_peak_755	356	.	10.1303	38.8351	35.6252	997
chr1	118458974	118459831	ATACpk_peak_756	132	.	5.81552	16	13.295	480
chr1	118458989	118459744	ATACpk_peak_756	132	.	5.81552	16	13.295	480
chr1	118459039	118459753	ATACpk_peak_756	132	.	5.81552	16	13.295	480
chr1	118490674	118491484	ATACpk_peak_757	50	.	3.75195	7.43695	5.05349	404
chr1	118490674	118491716	ATACpk_peak_757	50	.	3.75195	7.43695	5.05349	404
chr1	118490674	118491716	ATACpk_peak_757	50	.	3.75195	7.43695	5.05349	404
chr1	119200899	119201357	ATACpk_peak_758	38	.	3.37675	6.11872	3.81342	97
chr1	119421465	119421916	ATACpk_peak_759	21	.	2.81396	4.31522	2.14996	506
chr1	119421689	119422160	ATACpk_peak_759	21	.	2.81396	4.31522	2.14996	506
chr1	119504421	119505316	ATACpk_peak_760	272	.	8.62948	30.2984	27.2518	414
chr1	119504421	119505316	ATACpk_peak_760	272	.	8.62948	30.2984	27.2518	414
chr1	119504523	119505114	ATACpk_peak_760	272	.	8.62948	30.2984	27.2518	414
chr1	119523400	119523679	ATACpk_peak_761	16	.	2.62636	3.7656	1.65632	18
chr1	119525586	119527003	ATACpk_peak_762	686	.	15.383	72.3379	68.6356	755
chr1	119525422	119526948	ATACpk_peak_762	686	.	15.383	72.3379	68.6356	755
chr1	119525422	119527031	ATACpk_peak_762	686	.	15.383	72.3379	68.6356	755
chr1	119648292	119649841	ATACpk_peak_763	292	.	9.00468	32.3804	29.2928	614
chr1	119648334	119649240	ATACpk_peak_763	292	.	9.00468	32.3804	29.2928	614
chr1	119648302	119649547	ATACpk_peak_763	292	.	9.00468	32.3804	29.2928	614
chr1	119649809	119650151	ATACpk_peak_763	292	.	9.00468	32.3804	29.2928	614
chr1	119836822	119837902	ATACpk_peak_765	586	.	13.8822	62.2702	58.6945	723
chr1	119836822	119837902	ATACpk_peak_765	586	.	13.8822	62.2702	58.6945	723
chr1	119836822	119837902	ATACpk_peak_765	586	.	13.8822	62.2702	58.6945	723
chr1	119913028	119913672	ATACpk_peak_766	132	.	5.81552	16	13.295	231
chr1	119912887	119913672	ATACpk_peak_766	132	.	5.81552	16	13.295	231
chr1	119912997	119913667	ATACpk_peak_766	132	.	5.81552	16	13.295	231
chr1	119996953	119997863	ATACpk_peak_767	150	.	6.19072	17.7546	15.0004	266
chr1	119996963	119997760	ATACpk_peak_767	150	.	6.19072	17.7546	15.0004	266
chr1	119996953	119997863	ATACpk_peak_767	150	.	6.19072	17.7546	15.0004	266
chr1	120086423	120086935	ATACpk_peak_768	70	.	4.31474	9.56711	7.0808	449
chr1	120086558	120086935	ATACpk_peak_768	70	.	4.31474	9.56711	7.0808	449
chr1	120120459	120121752	ATACpk_peak_769	445	.	11.631	47.882	44.5182	689
chr1	120120459	120121752	ATACpk_peak_769	445	.	11.631	47.882	44.5182	689
chr1	120120612	120121685	ATACpk_peak_769	445	.	11.631	47.882	44.5182	689
chr1	121202769	121204788	ATACpk_peak_770	367	.	10.3179	39.9396	36.7101	1192
chr1	121202791	121204843	ATACpk_peak_770	367	.	10.3179	39.9396	36.7101	1192
chr1	121202767	121204734	ATACpk_peak_770	367	.	10.3179	39.9396	36.7101	1192
chr1	121327170	121328316	ATACpk_peak_771	378	.	10.5055	41.0519	37.8028	658
chr1	121327324	121328166	ATACpk_peak_771	378	.	10.5055	41.0519	37.8028	658
chr1	121327170	121328316	ATACpk_peak_771	378	.	10.5055	41.0519	37.8028	658
chr1	121430956	121431821	ATACpk_peak_772	356	.	10.1303	38.8351	35.6252	342
chr1	121430969	121431821	ATACpk_peak_772	356	.	10.1303	38.8351	35.6252	342
chr1	121430974	121431682	ATACpk_peak_772	356	.	10.1303	38.8351	35.6252	342
chr1	121483573	121484985	ATACpk_peak_773	85	.	4.68994	11.0793	8.53295	837
chr1	121483573	121484965	ATACpk_peak_773	85	.	4.68994	11.0793	8.53295	837
chr1	121483946	121484227	ATACpk_peak_773	85	.	4.68994	11.0793	8.53295	837
chr1	121527665	121529421	ATACpk_peak_774	70	.	4.31474	9.56711	7.0808	96
chr1	121527665	121529464	ATACpk_peak_774	70	.	4.31474	9.56711	7.0808	96
chr1	121527736	121529226	ATACpk_peak_774	70	.	4.31474	9.56711	7.0808	96
chr1	121567660	121568284	ATACpk_peak_775	150	.	6.19072	17.7546	15.0004	90
chr1	121567657	121568074	ATACpk_peak_775	150	.	6.19072	17.7546	15.0004	90
chr1	121567657	121568075	ATACpk_peak_775	150	.	6.19072	17.7546	15.0004	90
chr1	122772218	122773527	ATACpk_peak_776	167	.	6.56591	19.5605	16.7585	1247
chr1	122772426	122773565	ATACpk_peak_776	167	.	6.56591	19.5605	16.7585	1247
chr1	122772291	122773153	ATACpk_peak_776	167	.	6.56591	19.5605	16.7585	1247
chr1	123268852	123269327	ATACpk_peak_777	50	.	3.75195	7.43695	5.05349	433
chr1	123269014	123269346	ATACpk_peak_777	50	.	3.75195	7.43695	5.05349	433
chr1	123268852	123269336	ATACpk_peak_777	50	.	3.75195	7.43695	5.05349	433
chr1	125175560	125176241	ATACpk_peak_779	38	.	3.37675	6.11872	3.81342	830
chr1	125175560	125176768	ATACpk_peak_779	38	.	3.37675	6.11872	3.81342	830
chr1	125177480	125178106	ATACpk_peak_780	38	.	3.37675	6.11872	3.81342	558
chr1	125178590	125178876	ATACpk_peak_781	21	.	2.81396	4.31522	2.14996	7
chr1	125361650	125362509	ATACpk_peak_782	116	.	5.44033	14.3002	11.646	784
chr1	125361828	125362509	ATACpk_peak_782	116	.	5.44033	14.3002	11.646	784
chr1	125361904	125362509	ATACpk_peak_782	116	.	5.44033	14.3002	11.646	784
chr1	125434874	125436174	ATACpk_peak_783	324	.	9.56747	35.5699	32.4211	827
chr1	125434919	125436174	ATACpk_peak_783	324	.	9.56747	35.5699	32.4211	827
chr1	125435188	125436174	ATACpk_peak_783	324	.	9.56747	35.5699	32.4211	827
chr1	125560013	125561734	ATACpk_peak_784	737	.	16.1334	77.5001	73.7383	986
chr1	125560252	125561734	ATACpk_peak_784	737	.	16.1334	77.5001	73.7383	986
chr1	125560244	125561641	ATACpk_peak_784	737	.	16.1334	77.5001	73.7383	986
chr1	127204730	127206488	ATACpk_peak_785	213	.	7.5039	24.2823	21.367	278
chr1	127204852	127206308	ATACpk_peak_785	213	.	7.5039	24.2823	21.367	278
chr1	127204767	127206422	ATACpk_peak_785	213	.	7.5039	24.2823	21.367	278
chr1	127299439	127300700	ATACpk_peak_786	242	.	8.06669	27.2456	24.263	551
chr1	127299356	127300491	ATACpk_peak_786	242	.	8.06669	27.2456	24.263	551
chr1	127299486	127300363	ATACpk_peak_786	242	.	8.06669	27.2456	24.263	551
chr1	127773495	127774734	ATACpk_peak_787	868	.	18.0094	90.749	86.847	629
chr1	127773495	127774754	ATACpk_peak_787	868	.	18.0094	90.749	86.847	629
chr1	127773495	127774791	ATACpk_peak_787	868	.	18.0094	90.749	86.847	629
chr1	127868664	127869058	ATACpk_peak_788	324	.	9.56747	35.5699	32.4211	278
chr1	127868546	127868978	ATACpk_peak_788	324	.	9.56747	35.5699	32.4211	278
chr1	127868544	127869035	ATACpk_peak_788	324	.	9.56747	35.5699	32.4211	278
chr1	128013176	128013427	ATACpk_peak_789	21	.	2.81396	4.31522	2.14996	162
chr1	128013176	128013373	ATACpk_peak_789	21	.	2.81396	4.31522	2.14996	162
chr1	128065154	128066803	ATACpk_peak_790	661	.	15.0078	69.7881	66.117	740
chr1	128065154	128066803	ATACpk_peak_790	661	.	15.0078	69.7881	66.117	740
chr1	128065207	128066798	ATACpk_peak_790	661	.	15.0078	69.7881	66.117	740
chr1	128102318	128103950	ATACpk_peak_791	922	.	18.7597	96.1773	92.2233	871
chr1	128102318	128103950	ATACpk_peak_791	922	.	18.7597	96.1773	92.2233	871
chr1	128102360	128103758	ATACpk_peak_791	922	.	18.7597	96.1773	92.2233	871
chr1	128243575	128244977	ATACpk_peak_792	356	.	10.1303	38.8351	35.6252	885
chr1	128243572	128244959	ATACpk_peak_792	356	.	10.1303	38.8351	35.6252	885
chr1	128243761	128245015	ATACpk_peak_792	356	.	10.1303	38.8351	35.6252	885
chr1	128316045	128317477	ATACpk_peak_793	213	.	7.5039	24.2823	21.367	917
chr1	128315845	128317667	ATACpk_peak_793	213	.	7.5039	24.2823	21.367	917
chr1	128315905	128317426	ATACpk_peak_793	213	.	7.5039	24.2823	21.367	917
chr1	128359388	128360038	ATACpk_peak_794	623	.	14.445	66.004	62.3791	376
chr1	128359344	128360038	ATACpk_peak_794	623	.	14.445	66.004	62.3791	376
chr1	128359383	128359886	ATACpk_peak_794	623	.	14.445	66.004	62.3791	376
chr1	128416815	128417773	ATACpk_peak_795	686	.	15.383	72.3379	68.6356	484
chr1	128416815	128417644	ATACpk_peak_795	686	.	15.383	72.3379	68.6356	484
chr1	128416815	128417841	ATACpk_peak_795	686	.	15.383	72.3379	68.6356	484
chr1	129330937	129331231	ATACpk_peak_796	63	.	4.12714	8.83787	6.38376	809
chr1	129331537	129331808	ATACpk_peak_796	63	.	4.12714	8.83787	6.38376	809
chr1	129959459	129960080	ATACpk_peak_797	108	.	5.25273	13.4718	10.8435	84
chr1	129959459	129960073	ATACpk_peak_797	108	.	5.25273	13.4718	10.8435	84
chr1	129959459	129960064	ATACpk_peak_797	108	.	5.25273	13.4718	10.8435	84
chr1	130422491	130423427	ATACpk_peak_798	232	.	7.87909	26.2476	23.2872	397
chr1	130422405	130423459	ATACpk_peak_798	232	.	7.87909	26.2476	23.2872	397
chr1	130422405	130423459	ATACpk_peak_798	232	.	7.87909	26.2476	23.2872	397
chr1	130462092	130462975	ATACpk_peak_799	141	.	6.00312	16.8707	14.1409	407
chr1	130462092	130462975	ATACpk_peak_799	141	.	6.00312	16.8707	14.1409	407
chr1	130462092	130462940	ATACpk_peak_799	141	.	6.00312	16.8707	14.1409	407
chr1	130600483	130601124	ATACpk_peak_800	108	.	5.25273	13.4718	10.8435	544
chr1	130600269	130601035	ATACpk_peak_800	108	.	5.25273	13.4718	10.8435	544
chr1	130600309	130601134	ATACpk_peak_800	108	.	5.25273	13.4718	10.8435	544
chr1	130715410	130717795	ATACpk_peak_802	292	.	9.00468	32.3804	29.2928	2023
chr1	130715410	130717795	ATACpk_peak_802	292	.	9.00468	32.3804	29.2928	2023
chr1	130715525	130717795	ATACpk_peak_802	292	.	9.00468	32.3804	29.2928	2023
chr1	130981905	130982240	ATACpk_peak_803	32	.	3.18916	5.49317	3.23067	96
chr1	130981905	130982240	ATACpk_peak_803	32	.	3.18916	5.49317	3.23067	96
chr1	130981909	130982240	ATACpk_peak_803	32	.	3.18916	5.49317	3.23067	96
chr1	131097516	131097953	ATACpk_peak_804	176	.	6.75351	20.4818	17.6567	292
chr1	131097516	131097953	ATACpk_peak_804	176	.	6.75351	20.4818	17.6567	292
chr1	131097516	131097953	ATACpk_peak_804	176	.	6.75351	20.4818	17.6567	292
chr1	131126107	131126609	ATACpk_peak_805	44	.	3.56435	6.76701	4.42147	438
chr1	131126079	131126396	ATACpk_peak_805	44	.	3.56435	6.76701	4.42147	438
chr1	131137797	131139269	ATACpk_peak_806	313	.	9.37987	34.4981	31.3698	496
chr1	131137821	131139269	ATACpk_peak_806	313	.	9.37987	34.4981	31.3698	496
chr1	131137743	131139269	ATACpk_peak_806	313	.	9.37987	34.4981	31.3698	496
chr1	131153090	131153414	ATACpk_peak_807	108	.	5.25273	13.4718	10.8435	64
chr1	131153092	131153407	ATACpk_peak_807	108	.	5.25273	13.4718	10.8435	64
chr1	131153090	131153434	ATACpk_peak_807	108	.	5.25273	13.4718	10.8435	64
chr1	131525947	131528567	ATACpk_peak_810	1116	.	21.3861	115.703	111.606	1741
chr1	131525947	131528546	ATACpk_peak_810	1116	.	21.3861	115.703	111.606	1741
chr1	131525947	131528389	ATACpk_peak_810	1116	.	21.3861	115.703	111.606	1741
chr1	131827423	131828447	ATACpk_peak_811	334	.	9.75507	36.6501	33.4809	493
chr1	131827508	131828460	ATACpk_peak_811	334	.	9.75507	36.6501	33.4809	493
chr1	131827665	131828460	ATACpk_peak_811	334	.	9.75507	36.6501	33.4809	493
chr1	131910005	131911616	ATACpk_peak_812	411	.	11.0682	44.4342	41.1261	923
chr1	131910101	131911608	ATACpk_peak_812	411	.	11.0682	44.4342	41.1261	923
chr1	131910176	131911633	ATACpk_peak_812	411	.	11.0682	44.4342	41.1261	923
chr1	131962777	131963419	ATACpk_peak_813	272	.	8.62948	30.2984	27.2518	315
chr1	131962742	131963419	ATACpk_peak_813	272	.	8.62948	30.2984	27.2518	315
chr1	131962879	131963410	ATACpk_peak_813	272	.	8.62948	30.2984	27.2518	315
chr1	132007388	132008393	ATACpk_peak_814	303	.	9.19228	33.4349	30.3268	316
chr1	132007388	132008381	ATACpk_peak_814	303	.	9.19228	33.4349	30.3268	316
chr1	132007444	132008348	ATACpk_peak_814	303	.	9.19228	33.4349	30.3268	316
chr1	132131197	132131583	ATACpk_peak_815	50	.	3.75195	7.43695	5.05349	334
chr1	132204106	132204731	ATACpk_peak_816	50	.	3.75195	7.43695	5.05349	398
chr1	132211114	132213267	ATACpk_peak_817	141	.	6.00312	16.8707	14.1409	1386
chr1	132211046	132213267	ATACpk_peak_817	141	.	6.00312	16.8707	14.1409	1386
chr1	132211266	132213267	ATACpk_peak_817	141	.	6.00312	16.8707	14.1409	1386
chr1	132315644	132316524	ATACpk_peak_818	411	.	11.0682	44.4342	41.1261	472
chr1	132315621	132316537	ATACpk_peak_818	411	.	11.0682	44.4342	41.1261	472
chr1	132315682	132316532	ATACpk_peak_818	411	.	11.0682	44.4342	41.1261	472
chr1	132417000	132418076	ATACpk_peak_819	334	.	9.75507	36.6501	33.4809	1341
chr1	132416783	132418076	ATACpk_peak_819	334	.	9.75507	36.6501	33.4809	1341
chr1	132416923	132418076	ATACpk_peak_819	334	.	9.75507	36.6501	33.4809	1341
chr1	132477003	132477644	ATACpk_peak_820	116	.	5.44033	14.3002	11.646	339
chr1	132477003	132477644	ATACpk_peak_820	116	.	5.44033	14.3002	11.646	339
chr1	132477003	132477625	ATACpk_peak_820	116	.	5.44033	14.3002	11.646	339
chr1	132972537	132972788	ATACpk_peak_821	32	.	3.18916	5.49317	3.23067	465
chr1	132972252	132972773	ATACpk_peak_821	32	.	3.18916	5.49317	3.23067	465
chr1	132972326	132972788	ATACpk_peak_821	32	.	3.18916	5.49317	3.23067	465
chr1	133024937	133025691	ATACpk_peak_822	400	.	10.8807	43.2993	40.0106	740
chr1	133025074	133025691	ATACpk_peak_822	400	.	10.8807	43.2993	40.0106	740
chr1	133025101	133025691	ATACpk_peak_822	400	.	10.8807	43.2993	40.0106	740
chr1	133045898	133046495	ATACpk_peak_823	92	.	4.87753	11.8608	9.28651	265
chr1	133045898	133046481	ATACpk_peak_823	92	.	4.87753	11.8608	9.28651	265
chr1	133045898	133046495	ATACpk_peak_823	92	.	4.87753	11.8608	9.28651	265
chr1	133130821	133131919	ATACpk_peak_824	699	.	15.5706	73.6207	69.9037	380
chr1	133130821	133132448	ATACpk_peak_824	699	.	15.5706	73.6207	69.9037	380
chr1	133130821	133131787	ATACpk_peak_824	699	.	15.5706	73.6207	69.9037	380
chr1	133363128	133364067	ATACpk_peak_825	92	.	4.87753	11.8608	9.28651	484
chr1	133363128	133364978	ATACpk_peak_825	92	.	4.87753	11.8608	9.28651	484
chr1	133363328	133364225	ATACpk_peak_825	92	.	4.87753	11.8608	9.28651	484
chr1	133660817	133661480	ATACpk_peak_828	242	.	8.06669	27.2456	24.263	703
chr1	133660688	133661480	ATACpk_peak_828	242	.	8.06669	27.2456	24.263	703
chr1	133660688	133661480	ATACpk_peak_828	242	.	8.06669	27.2456	24.263	703
chr1	133753502	133753911	ATACpk_peak_829	50	.	3.75195	7.43695	5.05349	570
chr1	133753538	133753929	ATACpk_peak_829	50	.	3.75195	7.43695	5.05349	570
chr1	133753155	133753919	ATACpk_peak_829	50	.	3.75195	7.43695	5.05349	570
chr1	134344056	134344883	ATACpk_peak_830	252	.	8.25429	28.2535	25.2493	1006
chr1	134343751	134344883	ATACpk_peak_830	252	.	8.25429	28.2535	25.2493	1006
chr1	134343879	134344883	ATACpk_peak_830	252	.	8.25429	28.2535	25.2493	1006
chr1	134361572	134362123	ATACpk_peak_831	303	.	9.19228	33.4349	30.3268	616
chr1	134361527	134362123	ATACpk_peak_831	303	.	9.19228	33.4349	30.3268	616
chr1	134361547	134362106	ATACpk_peak_831	303	.	9.19228	33.4349	30.3268	616
chr1	134405705	134406370	ATACpk_peak_833	158	.	6.37831	18.6513	15.8732	263
chr1	134405725	134406378	ATACpk_peak_833	158	.	6.37831	18.6513	15.8732	263
chr1	134405715	134406124	ATACpk_peak_833	158	.	6.37831	18.6513	15.8732	263
chr1	134415207	134415888	ATACpk_peak_834	445	.	11.631	47.882	44.5182	107
chr1	134415207	134415888	ATACpk_peak_834	445	.	11.631	47.882	44.5182	107
chr1	134415207	134415888	ATACpk_peak_834	445	.	11.631	47.882	44.5182	107
chr1	134442106	134442442	ATACpk_peak_835	50	.	3.75195	7.43695	5.05349	190
chr1	134455212	134455895	ATACpk_peak_836	204	.	7.3163	23.3155	20.4228	334
chr1	134455212	134455770	ATACpk_peak_836	204	.	7.3163	23.3155	20.4228	334
chr1	134455232	134455774	ATACpk_peak_836	204	.	7.3163	23.3155	20.4228	334
chr1	134494359	134495145	ATACpk_peak_837	378	.	10.5055	41.0519	37.8028	244
chr1	134494359	134495195	ATACpk_peak_837	378	.	10.5055	41.0519	37.8028	244
chr1	134494359	134495195	ATACpk_peak_837	378	.	10.5055	41.0519	37.8028	244
chr1	134555323	134557841	ATACpk_peak_838	711	.	15.7582	74.9087	71.1769	1851
chr1	134555167	134557610	ATACpk_peak_838	711	.	15.7582	74.9087	71.1769	1851
chr1	134555312	134557277	ATACpk_peak_838	711	.	15.7582	74.9087	71.1769	1851
chr1	134559180	134562621	ATACpk_peak_839	673	.	15.1954	71.0603	67.3734	2388
chr1	134559180	134562621	ATACpk_peak_839	673	.	15.1954	71.0603	67.3734	2388
chr1	134559671	134562375	ATACpk_peak_839	673	.	15.1954	71.0603	67.3734	2388
chr1	134634597	134634888	ATACpk_peak_840	44	.	3.56435	6.76701	4.42147	1283
chr1	134635934	134636381	ATACpk_peak_840	44	.	3.56435	6.76701	4.42147	1283
chr1	134635490	134636526	ATACpk_peak_840	44	.	3.56435	6.76701	4.42147	1283
chr1	134636295	134636870	ATACpk_peak_840	44	.	3.56435	6.76701	4.42147	1283
chr1	134646432	134646710	ATACpk_peak_841	50	.	3.75195	7.43695	5.05349	226
chr1	134646501	134646710	ATACpk_peak_841	50	.	3.75195	7.43695	5.05349	226
chr1	134955454	134956058	ATACpk_peak_842	116	.	5.44033	14.3002	11.646	302
chr1	134955454	134956020	ATACpk_peak_842	116	.	5.44033	14.3002	11.646	302
chr1	134955454	134956034	ATACpk_peak_842	116	.	5.44033	14.3002	11.646	302
chr1	134962174	134962901	ATACpk_peak_843	356	.	10.1303	38.8351	35.6252	390
chr1	134962174	134963208	ATACpk_peak_843	356	.	10.1303	38.8351	35.6252	390
chr1	134962192	134962771	ATACpk_peak_843	356	.	10.1303	38.8351	35.6252	390
chr1	134978185	134978552	ATACpk_peak_844	32	.	3.18916	5.49317	3.23067	60
chr1	134987033	134988126	ATACpk_peak_845	389	.	10.6931	42.1718	38.903	703
chr1	134987033	134988224	ATACpk_peak_845	389	.	10.6931	42.1718	38.903	703
chr1	134987051	134988188	ATACpk_peak_845	389	.	10.6931	42.1718	38.903	703
chr1	135248446	135248879	ATACpk_peak_846	70	.	4.31474	9.56711	7.0808	95
chr1	135248446	135248879	ATACpk_peak_846	70	.	4.31474	9.56711	7.0808	95
chr1	135248446	135248879	ATACpk_peak_846	70	.	4.31474	9.56711	7.0808	95
chr1	135283445	135284139	ATACpk_peak_847	32	.	3.18916	5.49317	3.23067	656
chr1	135283445	135284139	ATACpk_peak_847	32	.	3.18916	5.49317	3.23067	656
chr1	135283499	135284137	ATACpk_peak_847	32	.	3.18916	5.49317	3.23067	656
chr1	135313306	135314070	ATACpk_peak_848	252	.	8.25429	28.2535	25.2493	610
chr1	135313273	135314070	ATACpk_peak_848	252	.	8.25429	28.2535	25.2493	610
chr1	135313474	135313942	ATACpk_peak_848	252	.	8.25429	28.2535	25.2493	610
chr1	135369444	135369599	ATACpk_peak_849	21	.	2.81396	4.31522	2.14996	175
chr1	135430129	135430943	ATACpk_peak_850	313	.	9.37987	34.4981	31.3698	399
chr1	135430129	135431039	ATACpk_peak_850	313	.	9.37987	34.4981	31.3698	399
chr1	135430129	135431039	ATACpk_peak_850	313	.	9.37987	34.4981	31.3698	399
chr1	135818708	135819019	ATACpk_peak_852	32	.	3.18916	5.49317	3.23067	174
chr1	135945009	135945922	ATACpk_peak_854	44	.	3.56435	6.76701	4.42147	75
chr1	135945009	135945922	ATACpk_peak_854	44	.	3.56435	6.76701	4.42147	75
chr1	135945009	135945922	ATACpk_peak_854	44	.	3.56435	6.76701	4.42147	75
chr1	135946354	135946662	ATACpk_peak_855	32	.	3.18916	5.49317	3.23067	172
chr1	135946354	135946647	ATACpk_peak_855	32	.	3.18916	5.49317	3.23067	172
chr1	135946354	135946569	ATACpk_peak_855	32	.	3.18916	5.49317	3.23067	172
chr1	136017871	136018748	ATACpk_peak_856	213	.	7.5039	24.2823	21.367	152
chr1	136017871	136018748	ATACpk_peak_856	213	.	7.5039	24.2823	21.367	152
chr1	136017920	136018715	ATACpk_peak_856	213	.	7.5039	24.2823	21.367	152
chr1	136131207	136131914	ATACpk_peak_857	242	.	8.06669	27.2456	24.263	220
chr1	136131207	136131911	ATACpk_peak_857	242	.	8.06669	27.2456	24.263	220
chr1	136131207	136131891	ATACpk_peak_857	242	.	8.06669	27.2456	24.263	220
chr1	136140185	136140465	ATACpk_peak_858	26	.	3.00156	4.89156	2.67543	62
chr1	136174148	136174615	ATACpk_peak_860	26	.	3.00156	4.89156	2.67543	399
chr1	136174590	136174615	ATACpk_peak_860	26	.	3.00156	4.89156	2.67543	399
chr1	136174331	136174615	ATACpk_peak_860	26	.	3.00156	4.89156	2.67543	399
chr1	136233627	136234734	ATACpk_peak_861	158	.	6.37831	18.6513	15.8732	378
chr1	136233627	136234705	ATACpk_peak_861	158	.	6.37831	18.6513	15.8732	378
chr1	136233627	136234750	ATACpk_peak_861	158	.	6.37831	18.6513	15.8732	378
chr1	136259817	136260961	ATACpk_peak_862	223	.	7.6915	25.2597	22.3218	563
chr1	136259817	136260903	ATACpk_peak_862	223	.	7.6915	25.2597	22.3218	563
chr1	136259879	136260961	ATACpk_peak_862	223	.	7.6915	25.2597	22.3218	563
chr1	136336882	136338924	ATACpk_peak_863	176	.	6.75351	20.4818	17.6567	1121
chr1	136336882	136339267	ATACpk_peak_863	176	.	6.75351	20.4818	17.6567	1121
chr1	136336882	136339147	ATACpk_peak_863	176	.	6.75351	20.4818	17.6567	1121
chr1	136345402	136346573	ATACpk_peak_864	324	.	9.56747	35.5699	32.4211	793
chr1	136345472	136346762	ATACpk_peak_864	324	.	9.56747	35.5699	32.4211	793
chr1	136345604	136346560	ATACpk_peak_864	324	.	9.56747	35.5699	32.4211	793
chr1	136414993	136416010	ATACpk_peak_865	411	.	11.0682	44.4342	41.1261	529
chr1	136415053	136416010	ATACpk_peak_865	411	.	11.0682	44.4342	41.1261	529
chr1	136415167	136416002	ATACpk_peak_865	411	.	11.0682	44.4342	41.1261	529
chr1	136466129	136466606	ATACpk_peak_866	503	.	12.569	53.7657	50.3112	173
chr1	136466133	136466606	ATACpk_peak_866	503	.	12.569	53.7657	50.3112	173
chr1	136466129	136466594	ATACpk_peak_866	503	.	12.569	53.7657	50.3112	173
chr1	136588783	136589136	ATACpk_peak_867	63	.	4.12714	8.83787	6.38376	194
chr1	136588809	136589136	ATACpk_peak_867	63	.	4.12714	8.83787	6.38376	194
chr1	136624394	136625056	ATACpk_peak_868	252	.	8.25429	28.2535	25.2493	541
chr1	136624618	136625058	ATACpk_peak_868	252	.	8.25429	28.2535	25.2493	541
chr1	136624643	136625058	ATACpk_peak_868	252	.	8.25429	28.2535	25.2493	541
chr1	136676733	136677045	ATACpk_peak_869	26	.	3.00156	4.89156	2.67543	236
chr1	136676733	136677045	ATACpk_peak_869	26	.	3.00156	4.89156	2.67543	236
chr1	136707261	136708023	ATACpk_peak_870	57	.	3.93955	8.12754	5.70762	204
chr1	136733054	136733582	ATACpk_peak_871	50	.	3.75195	7.43695	5.05349	487
chr1	136733054	136733582	ATACpk_peak_871	50	.	3.75195	7.43695	5.05349	487
chr1	136733054	136733545	ATACpk_peak_871	50	.	3.75195	7.43695	5.05349	487
chr1	137223157	137223259	ATACpk_peak_872	21	.	2.81396	4.31522	2.14996	287
chr1	137303690	137304093	ATACpk_peak_873	50	.	3.75195	7.43695	5.05349	132
chr1	137304016	137304093	ATACpk_peak_873	50	.	3.75195	7.43695	5.05349	132
chr1	137338398	137339566	ATACpk_peak_874	100	.	5.06513	12.6585	10.057	582
chr1	137338340	137339676	ATACpk_peak_874	100	.	5.06513	12.6585	10.057	582
chr1	137338002	137339676	ATACpk_peak_874	100	.	5.06513	12.6585	10.057	582
chr1	138619012	138619837	ATACpk_peak_875	213	.	7.5039	24.2823	21.367	420
chr1	138619012	138619802	ATACpk_peak_875	213	.	7.5039	24.2823	21.367	420
chr1	138619012	138619847	ATACpk_peak_875	213	.	7.5039	24.2823	21.367	420
chr1	138856383	138856927	ATACpk_peak_878	194	.	7.1287	22.3596	19.4893	316
chr1	138856443	138856927	ATACpk_peak_878	194	.	7.1287	22.3596	19.4893	316
chr1	138856318	138856886	ATACpk_peak_878	194	.	7.1287	22.3596	19.4893	316
chr1	138963348	138963726	ATACpk_peak_879	92	.	4.87753	11.8608	9.28651	378
chr1	138963554	138963870	ATACpk_peak_879	92	.	4.87753	11.8608	9.28651	378
chr1	138963484	138963934	ATACpk_peak_879	92	.	4.87753	11.8608	9.28651	378
chr1	139421955	139422464	ATACpk_peak_880	185	.	6.94111	21.415	18.5672	242
chr1	139421932	139422464	ATACpk_peak_880	185	.	6.94111	21.415	18.5672	242
chr1	139421932	139422464	ATACpk_peak_880	185	.	6.94111	21.415	18.5672	242
chr1	139454017	139455398	ATACpk_peak_881	562	.	13.507	59.81	56.2679	715
chr1	139454017	139455398	ATACpk_peak_881	562	.	13.507	59.81	56.2679	715
chr1	139454017	139455249	ATACpk_peak_881	562	.	13.507	59.81	56.2679	715
chr1	141190114	141190225	ATACpk_peak_883	21	.	2.81396	4.31522	2.14996	315
chr1	143702377	143703162	ATACpk_peak_884	150	.	6.19072	17.7546	15.0004	464
chr1	143702377	143703162	ATACpk_peak_884	150	.	6.19072	17.7546	15.0004	464
chr1	143702377	143703106	ATACpk_peak_884	150	.	6.19072	17.7546	15.0004	464
chr1	143739359	143739782	ATACpk_peak_885	63	.	4.12714	8.83787	6.38376	385
chr1	143739359	143739782	ATACpk_peak_885	63	.	4.12714	8.83787	6.38376	385
chr1	143739359	143739782	ATACpk_peak_885	63	.	4.12714	8.83787	6.38376	385
chr1	143776645	143777852	ATACpk_peak_886	479	.	12.1938	51.3923	47.9733	481
chr1	143776645	143777852	ATACpk_peak_886	479	.	12.1938	51.3923	47.9733	481
chr1	143776761	143777852	ATACpk_peak_886	479	.	12.1938	51.3923	47.9733	481
chr1	143862470	143862520	ATACpk_peak_887	21	.	2.81396	4.31522	2.14996	23
chr1	143862299	143862520	ATACpk_peak_887	21	.	2.81396	4.31522	2.14996	23
chr1	144004095	144004655	ATACpk_peak_888	303	.	9.19228	33.4349	30.3268	128
chr1	144004095	144004655	ATACpk_peak_888	303	.	9.19228	33.4349	30.3268	128
chr1	144004095	144004457	ATACpk_peak_888	303	.	9.19228	33.4349	30.3268	128
chr1	144224938	144225634	ATACpk_peak_889	85	.	4.68994	11.0793	8.53295	119
chr1	144225027	144225625	ATACpk_peak_889	85	.	4.68994	11.0793	8.53295	119
chr1	145509397	145509963	ATACpk_peak_891	141	.	6.00312	16.8707	14.1409	175
chr1	145509372	145509984	ATACpk_peak_891	141	.	6.00312	16.8707	14.1409	175
chr1	145509365	145509909	ATACpk_peak_891	141	.	6.00312	16.8707	14.1409	175
chr1	147043152	147044535	ATACpk_peak_892	70	.	4.31474	9.56711	7.0808	764
chr1	147043152	147044894	ATACpk_peak_892	70	.	4.31474	9.56711	7.0808	764
chr1	147043152	147044985	ATACpk_peak_892	70	.	4.31474	9.56711	7.0808	764
chr1	148379040	148379460	ATACpk_peak_894	38	.	3.37675	6.11872	3.81342	221
chr1	148711951	148712754	ATACpk_peak_895	92	.	4.87753	11.8608	9.28651	313
chr1	148711993	148712754	ATACpk_peak_895	92	.	4.87753	11.8608	9.28651	313
chr1	148712077	148712754	ATACpk_peak_895	92	.	4.87753	11.8608	9.28651	313
chr1	148723269	148723538	ATACpk_peak_896	50	.	3.75195	7.43695	5.05349	167
chr1	149032150	149032857	ATACpk_peak_897	108	.	5.25273	13.4718	10.8435	360
chr1	149032311	149032833	ATACpk_peak_897	108	.	5.25273	13.4718	10.8435	360
chr1	149032150	149032852	ATACpk_peak_897	108	.	5.25273	13.4718	10.8435	360
chr1	150278971	150279328	ATACpk_peak_898	32	.	3.18916	5.49317	3.23067	649
chr1	150392674	150393614	ATACpk_peak_899	623	.	14.445	66.004	62.3791	424
chr1	150392674	150393614	ATACpk_peak_899	623	.	14.445	66.004	62.3791	424
chr1	150392674	150393614	ATACpk_peak_899	623	.	14.445	66.004	62.3791	424
chr1	151086643	151087191	ATACpk_peak_901	44	.	3.56435	6.76701	4.42147	34
chr1	151086627	151087191	ATACpk_peak_901	44	.	3.56435	6.76701	4.42147	34
chr1	151177066	151177912	ATACpk_peak_902	57	.	3.93955	8.12754	5.70762	982
chr1	151177062	151177837	ATACpk_peak_902	57	.	3.93955	8.12754	5.70762	982
chr1	151177181	151177927	ATACpk_peak_902	57	.	3.93955	8.12754	5.70762	982
chr1	151343723	151345428	ATACpk_peak_903	855	.	17.8218	89.4031	85.5142	734
chr1	151344034	151345428	ATACpk_peak_903	855	.	17.8218	89.4031	85.5142	734
chr1	151343723	151345428	ATACpk_peak_903	855	.	17.8218	89.4031	85.5142	734
chr1	151428066	151429130	ATACpk_peak_904	574	.	13.6946	61.0372	57.4783	423
chr1	151428066	151429454	ATACpk_peak_904	574	.	13.6946	61.0372	57.4783	423
chr1	151428066	151429077	ATACpk_peak_904	574	.	13.6946	61.0372	57.4783	423
chr1	151500178	151501273	ATACpk_peak_905	503	.	12.569	53.7657	50.3112	834
chr1	151500178	151501405	ATACpk_peak_905	503	.	12.569	53.7657	50.3112	834
chr1	151500178	151501140	ATACpk_peak_905	503	.	12.569	53.7657	50.3112	834
chr1	151754947	151755995	ATACpk_peak_906	711	.	15.7582	74.9087	71.1769	324
chr1	151754852	151755995	ATACpk_peak_906	711	.	15.7582	74.9087	71.1769	324
chr1	151754946	151755955	ATACpk_peak_906	711	.	15.7582	74.9087	71.1769	324
chr1	151800614	151802583	ATACpk_peak_907	50	.	3.75195	7.43695	5.05349	1462
chr1	151800526	151802583	ATACpk_peak_907	50	.	3.75195	7.43695	5.05349	1462
chr1	151800458	151802583	ATACpk_peak_907	50	.	3.75195	7.43695	5.05349	1462
chr1	152022156	152022572	ATACpk_peak_909	100	.	5.06513	12.6585	10.057	187
chr1	152022020	152022529	ATACpk_peak_909	100	.	5.06513	12.6585	10.057	187
chr1	152022041	152022509	ATACpk_peak_909	100	.	5.06513	12.6585	10.057	187
chr1	152089576	152090443	ATACpk_peak_910	85	.	4.68994	11.0793	8.53295	792
chr1	152089926	152090443	ATACpk_peak_910	85	.	4.68994	11.0793	8.53295	792
chr1	152090037	152090443	ATACpk_peak_910	85	.	4.68994	11.0793	8.53295	792
chr1	152386331	152386735	ATACpk_peak_911	132	.	5.81552	16	13.295	89
chr1	152386331	152386774	ATACpk_peak_911	132	.	5.81552	16	13.295	89
chr1	152386331	152386719	ATACpk_peak_911	132	.	5.81552	16	13.295	89
chr1	152625044	152625210	ATACpk_peak_912	57	.	3.93955	8.12754	5.70762	110
chr1	152766015	152767109	ATACpk_peak_913	611	.	14.2574	64.7537	61.1451	424
chr1	152766015	152767109	ATACpk_peak_913	611	.	14.2574	64.7537	61.1451	424
chr1	152766015	152767109	ATACpk_peak_913	611	.	14.2574	64.7537	61.1451	424
chr1	152901963	152904220	ATACpk_peak_914	1158	.	21.9489	119.988	115.87	1574
chr1	152902028	152904220	ATACpk_peak_914	1158	.	21.9489	119.988	115.87	1574
chr1	152902007	152904220	ATACpk_peak_914	1158	.	21.9489	119.988	115.87	1574
chr1	153332450	153333106	ATACpk_peak_915	63	.	4.12714	8.83787	6.38376	519
chr1	153332276	153333106	ATACpk_peak_915	63	.	4.12714	8.83787	6.38376	519
chr1	153332565	153333106	ATACpk_peak_915	63	.	4.12714	8.83787	6.38376	519
chr1	153424330	153425602	ATACpk_peak_916	204	.	7.3163	23.3155	20.4228	720
chr1	153424342	153425690	ATACpk_peak_916	204	.	7.3163	23.3155	20.4228	720
chr1	153424507	153425823	ATACpk_peak_916	204	.	7.3163	23.3155	20.4228	720
chr1	153451829	153452250	ATACpk_peak_919	26	.	3.00156	4.89156	2.67543	167
chr1	153486884	153487978	ATACpk_peak_920	378	.	10.5055	41.0519	37.8028	1019
chr1	153486871	153487978	ATACpk_peak_920	378	.	10.5055	41.0519	37.8028	1019
chr1	153486924	153487978	ATACpk_peak_920	378	.	10.5055	41.0519	37.8028	1019
chr1	153739898	153741182	ATACpk_peak_921	194	.	7.1287	22.3596	19.4893	364
chr1	153739898	153740751	ATACpk_peak_921	194	.	7.1287	22.3596	19.4893	364
chr1	153739892	153740500	ATACpk_peak_921	194	.	7.1287	22.3596	19.4893	364
chr1	153777735	153778174	ATACpk_peak_923	44	.	3.56435	6.76701	4.42147	128
chr1	153899796	153900224	ATACpk_peak_924	44	.	3.56435	6.76701	4.42147	140
chr1	153899814	153900224	ATACpk_peak_924	44	.	3.56435	6.76701	4.42147	140
chr1	153899822	153900218	ATACpk_peak_924	44	.	3.56435	6.76701	4.42147	140
chr1	154207189	154208293	ATACpk_peak_925	85	.	4.68994	11.0793	8.53295	325
chr1	154207390	154207917	ATACpk_peak_925	85	.	4.68994	11.0793	8.53295	325
chr1	155083116	155083955	ATACpk_peak_927	400	.	10.8807	43.2993	40.0106	396
chr1	155083116	155083955	ATACpk_peak_927	400	.	10.8807	43.2993	40.0106	396
chr1	155083137	155083955	ATACpk_peak_927	400	.	10.8807	43.2993	40.0106	396
chr1	155098399	155099981	ATACpk_peak_929	468	.	12.0062	50.2154	46.8149	1350
chr1	155098399	155099981	ATACpk_peak_929	468	.	12.0062	50.2154	46.8149	1350
chr1	155098541	155099981	ATACpk_peak_929	468	.	12.0062	50.2154	46.8149	1350
chr1	155122682	155123022	ATACpk_peak_930	124	.	5.62792	15.1431	12.4635	157
chr1	155122682	155123253	ATACpk_peak_930	124	.	5.62792	15.1431	12.4635	157
chr1	155122682	155123202	ATACpk_peak_930	124	.	5.62792	15.1431	12.4635	157
chr1	155158338	155159233	ATACpk_peak_931	345	.	9.94267	37.7386	34.549	618
chr1	155158088	155159233	ATACpk_peak_931	345	.	9.94267	37.7386	34.549	618
chr1	155158390	155159233	ATACpk_peak_931	345	.	9.94267	37.7386	34.549	618
chr1	155416777	155417609	ATACpk_peak_932	303	.	9.19228	33.4349	30.3268	681
chr1	155416699	155417662	ATACpk_peak_932	303	.	9.19228	33.4349	30.3268	681
chr1	155416803	155417567	ATACpk_peak_932	303	.	9.19228	33.4349	30.3268	681
chr1	155558098	155558716	ATACpk_peak_933	132	.	5.81552	16	13.295	406
chr1	155558098	155558639	ATACpk_peak_933	132	.	5.81552	16	13.295	406
chr1	155558098	155558637	ATACpk_peak_933	132	.	5.81552	16	13.295	406
chr1	155770112	155770485	ATACpk_peak_934	108	.	5.25273	13.4718	10.8435	143
chr1	155770112	155770677	ATACpk_peak_934	108	.	5.25273	13.4718	10.8435	143
chr1	155770111	155770900	ATACpk_peak_934	108	.	5.25273	13.4718	10.8435	143
chr1	155812053	155813353	ATACpk_peak_935	223	.	7.6915	25.2597	22.3218	1027
chr1	155812190	155813733	ATACpk_peak_935	223	.	7.6915	25.2597	22.3218	1027
chr1	155812205	155813379	ATACpk_peak_935	223	.	7.6915	25.2597	22.3218	1027
chr1	155972653	155974142	ATACpk_peak_936	468	.	12.0062	50.2154	46.8149	791
chr1	155972692	155974142	ATACpk_peak_936	468	.	12.0062	50.2154	46.8149	791
chr1	155972599	155974142	ATACpk_peak_936	468	.	12.0062	50.2154	46.8149	791
chr1	156020447	156020962	ATACpk_peak_937	32	.	3.18916	5.49317	3.23067	91
chr1	156020447	156020729	ATACpk_peak_937	32	.	3.18916	5.49317	3.23067	91
chr1	156020447	156021217	ATACpk_peak_937	32	.	3.18916	5.49317	3.23067	91
chr1	156035318	156036599	ATACpk_peak_938	611	.	14.2574	64.7537	61.1451	883
chr1	156035150	156036599	ATACpk_peak_938	611	.	14.2574	64.7537	61.1451	883
chr1	156035423	156036599	ATACpk_peak_938	611	.	14.2574	64.7537	61.1451	883
chr1	156040304	156040949	ATACpk_peak_939	158	.	6.37831	18.6513	15.8732	525
chr1	156040304	156040949	ATACpk_peak_939	158	.	6.37831	18.6513	15.8732	525
chr1	156040304	156040949	ATACpk_peak_939	158	.	6.37831	18.6513	15.8732	525
chr1	156246312	156247178	ATACpk_peak_941	38	.	3.37675	6.11872	3.81342	351
chr1	156246238	156246522	ATACpk_peak_941	38	.	3.37675	6.11872	3.81342	351
chr1	156246838	156247171	ATACpk_peak_941	38	.	3.37675	6.11872	3.81342	351
chr1	156246571	156247178	ATACpk_peak_941	38	.	3.37675	6.11872	3.81342	351
chr1	156304190	156304694	ATACpk_peak_942	491	.	12.3814	52.5757	49.1389	982
chr1	156302510	156303796	ATACpk_peak_942	491	.	12.3814	52.5757	49.1389	982
chr1	156302588	156304217	ATACpk_peak_942	491	.	12.3814	52.5757	49.1389	982
chr1	156302951	156304216	ATACpk_peak_942	491	.	12.3814	52.5757	49.1389	982
chr1	156305196	156306196	ATACpk_peak_943	38	.	3.37675	6.11872	3.81342	521
chr1	156305196	156306196	ATACpk_peak_943	38	.	3.37675	6.11872	3.81342	521
chr1	156306582	156306931	ATACpk_peak_944	38	.	3.37675	6.11872	3.81342	128
chr1	156306582	156306931	ATACpk_peak_944	38	.	3.37675	6.11872	3.81342	128
chr1	156306781	156306931	ATACpk_peak_944	38	.	3.37675	6.11872	3.81342	128
chr1	156420678	156421618	ATACpk_peak_945	324	.	9.56747	35.5699	32.4211	501
chr1	156420678	156421720	ATACpk_peak_945	324	.	9.56747	35.5699	32.4211	501
chr1	156420678	156421351	ATACpk_peak_945	324	.	9.56747	35.5699	32.4211	501
chr1	156473151	156473532	ATACpk_peak_946	38	.	3.37675	6.11872	3.81342	102
chr1	156473830	156474553	ATACpk_peak_947	272	.	8.62948	30.2984	27.2518	461
chr1	156473857	156474553	ATACpk_peak_947	272	.	8.62948	30.2984	27.2518	461
chr1	156473893	156474553	ATACpk_peak_947	272	.	8.62948	30.2984	27.2518	461
chr1	156499360	156500929	ATACpk_peak_948	232	.	7.87909	26.2476	23.2872	956
chr1	156499406	156500929	ATACpk_peak_948	232	.	7.87909	26.2476	23.2872	956
chr1	156499566	156500716	ATACpk_peak_948	232	.	7.87909	26.2476	23.2872	956
chr1	156558189	156559548	ATACpk_peak_950	514	.	12.7566	54.9621	51.4896	651
chr1	156558472	156559548	ATACpk_peak_950	514	.	12.7566	54.9621	51.4896	651
chr1	156558470	156559548	ATACpk_peak_950	514	.	12.7566	54.9621	51.4896	651
chr1	156718367	156719518	ATACpk_peak_951	491	.	12.3814	52.5757	49.1389	1061
chr1	156718314	156719518	ATACpk_peak_951	491	.	12.3814	52.5757	49.1389	1061
chr1	156718316	156719518	ATACpk_peak_951	491	.	12.3814	52.5757	49.1389	1061
chr1	156787343	156787631	ATACpk_peak_952	63	.	4.12714	8.83787	6.38376	42
chr1	156938552	156939182	ATACpk_peak_953	38	.	3.37675	6.11872	3.81342	211
chr1	156938515	156939182	ATACpk_peak_953	38	.	3.37675	6.11872	3.81342	211
chr1	156939020	156939182	ATACpk_peak_953	38	.	3.37675	6.11872	3.81342	211
chr1	156939548	156941627	ATACpk_peak_954	158	.	6.37831	18.6513	15.8732	271
chr1	156939548	156941111	ATACpk_peak_954	158	.	6.37831	18.6513	15.8732	271
chr1	156939548	156941035	ATACpk_peak_954	158	.	6.37831	18.6513	15.8732	271
chr1	156941331	156941627	ATACpk_peak_954	158	.	6.37831	18.6513	15.8732	271
chr1	156969469	156971401	ATACpk_peak_955	282	.	8.81708	31.3349	28.2675	918
chr1	156969469	156971329	ATACpk_peak_955	282	.	8.81708	31.3349	28.2675	918
chr1	156969469	156970460	ATACpk_peak_955	282	.	8.81708	31.3349	28.2675	918
chr1	156970826	156971147	ATACpk_peak_955	282	.	8.81708	31.3349	28.2675	918
chr1	157076282	157077315	ATACpk_peak_956	92	.	4.87753	11.8608	9.28651	210
chr1	157076392	157077315	ATACpk_peak_956	92	.	4.87753	11.8608	9.28651	210
chr1	157076417	157077315	ATACpk_peak_956	92	.	4.87753	11.8608	9.28651	210
chr1	157411818	157412777	ATACpk_peak_957	367	.	10.3179	39.9396	36.7101	502
chr1	157411808	157412777	ATACpk_peak_957	367	.	10.3179	39.9396	36.7101	502
chr1	157411808	157412777	ATACpk_peak_957	367	.	10.3179	39.9396	36.7101	502
chr1	157443566	157443729	ATACpk_peak_958	32	.	3.18916	5.49317	3.23067	134
chr1	157443451	157443729	ATACpk_peak_958	32	.	3.18916	5.49317	3.23067	134
chr1	157443627	157443729	ATACpk_peak_958	32	.	3.18916	5.49317	3.23067	134
chr1	158331852	158332497	ATACpk_peak_959	50	.	3.75195	7.43695	5.05349	504
chr1	158331857	158332335	ATACpk_peak_959	50	.	3.75195	7.43695	5.05349	504
chr1	159231606	159232720	ATACpk_peak_961	456	.	11.8186	49.0453	45.6633	628
chr1	159231606	159232720	ATACpk_peak_961	456	.	11.8186	49.0453	45.6633	628
chr1	159231624	159232720	ATACpk_peak_961	456	.	11.8186	49.0453	45.6633	628
chr1	160194726	160195626	ATACpk_peak_963	673	.	15.1954	71.0603	67.3734	429
chr1	160194726	160195626	ATACpk_peak_963	673	.	15.1954	71.0603	67.3734	429
chr1	160194933	160195492	ATACpk_peak_963	673	.	15.1954	71.0603	67.3734	429
chr1	160212363	160213685	ATACpk_peak_964	868	.	18.0094	90.749	86.847	493
chr1	160212363	160213685	ATACpk_peak_964	868	.	18.0094	90.749	86.847	493
chr1	160212420	160213422	ATACpk_peak_964	868	.	18.0094	90.749	86.847	493
chr1	160421595	160422020	ATACpk_peak_965	32	.	3.18916	5.49317	3.23067	327
chr1	160670708	160670953	ATACpk_peak_966	26	.	3.00156	4.89156	2.67543	40
chr1	160792022	160793166	ATACpk_peak_967	411	.	11.0682	44.4342	41.1261	818
chr1	160792128	160793194	ATACpk_peak_967	411	.	11.0682	44.4342	41.1261	818
chr1	160792048	160793086	ATACpk_peak_967	411	.	11.0682	44.4342	41.1261	818
chr1	160881483	160881750	ATACpk_peak_968	150	.	6.19072	17.7546	15.0004	38
chr1	160881483	160881750	ATACpk_peak_968	150	.	6.19072	17.7546	15.0004	38
chr1	160881483	160881569	ATACpk_peak_968	150	.	6.19072	17.7546	15.0004	38
chr1	160905718	160907228	ATACpk_peak_969	699	.	15.5706	73.6207	69.9037	679
chr1	160905718	160907310	ATACpk_peak_969	699	.	15.5706	73.6207	69.9037	679
chr1	160905807	160907315	ATACpk_peak_969	699	.	15.5706	73.6207	69.9037	679
chr1	161034326	161035760	ATACpk_peak_970	828	.	17.4466	86.7249	82.8631	519
chr1	161034326	161036013	ATACpk_peak_970	828	.	17.4466	86.7249	82.8631	519
chr1	161034326	161035680	ATACpk_peak_970	828	.	17.4466	86.7249	82.8631	519
chr1	161070237	161071660	ATACpk_peak_971	479	.	12.1938	51.3923	47.9733	588
chr1	161070237	161071660	ATACpk_peak_971	479	.	12.1938	51.3923	47.9733	588
chr1	161070237	161071223	ATACpk_peak_971	479	.	12.1938	51.3923	47.9733	588
chr1	161131099	161131589	ATACpk_peak_972	44	.	3.56435	6.76701	4.42147	221
chr1	161131099	161131590	ATACpk_peak_972	44	.	3.56435	6.76701	4.42147	221
chr1	161131099	161131583	ATACpk_peak_972	44	.	3.56435	6.76701	4.42147	221
chr1	161142457	161143044	ATACpk_peak_973	223	.	7.6915	25.2597	22.3218	243
chr1	161142457	161143044	ATACpk_peak_973	223	.	7.6915	25.2597	22.3218	243
chr1	161142630	161143044	ATACpk_peak_973	223	.	7.6915	25.2597	22.3218	243
chr1	161175295	161176105	ATACpk_peak_974	63	.	4.12714	8.83787	6.38376	334
chr1	161175137	161176105	ATACpk_peak_974	63	.	4.12714	8.83787	6.38376	334
chr1	161175137	161176105	ATACpk_peak_974	63	.	4.12714	8.83787	6.38376	334
chr1	161195644	161196178	ATACpk_peak_975	44	.	3.56435	6.76701	4.42147	498
chr1	161195644	161196175	ATACpk_peak_975	44	.	3.56435	6.76701	4.42147	498
chr1	161195644	161196178	ATACpk_peak_975	44	.	3.56435	6.76701	4.42147	498
chr1	161250347	161251371	ATACpk_peak_976	262	.	8.44189	29.2712	26.2456	846
chr1	161250563	161251371	ATACpk_peak_976	262	.	8.44189	29.2712	26.2456	846
chr1	161250722	161251386	ATACpk_peak_976	262	.	8.44189	29.2712	26.2456	846
chr1	161876067	161877814	ATACpk_peak_978	1018	.	20.0729	105.841	101.805	848
chr1	161876067	161877814	ATACpk_peak_978	1018	.	20.0729	105.841	101.805	848
chr1	161876067	161877814	ATACpk_peak_978	1018	.	20.0729	105.841	101.805	848
chr1	161969083	161969734	ATACpk_peak_979	158	.	6.37831	18.6513	15.8732	144
chr1	161969083	161969730	ATACpk_peak_979	158	.	6.37831	18.6513	15.8732	144
chr1	161969093	161969730	ATACpk_peak_979	158	.	6.37831	18.6513	15.8732	144
chr1	161977079	161977358	ATACpk_peak_980	26	.	3.00156	4.89156	2.67543	197
chr1	161977079	161977358	ATACpk_peak_980	26	.	3.00156	4.89156	2.67543	197
chr1	162476805	162478523	ATACpk_peak_982	586	.	13.8822	62.2702	58.6945	1245
chr1	162476734	162478713	ATACpk_peak_982	586	.	13.8822	62.2702	58.6945	1245
chr1	162476886	162478713	ATACpk_peak_982	586	.	13.8822	62.2702	58.6945	1245
chr1	162548127	162549094	ATACpk_peak_983	367	.	10.3179	39.9396	36.7101	528
chr1	162548083	162549094	ATACpk_peak_983	367	.	10.3179	39.9396	36.7101	528
chr1	162548083	162549040	ATACpk_peak_983	367	.	10.3179	39.9396	36.7101	528
chr1	162568119	162568873	ATACpk_peak_984	50	.	3.75195	7.43695	5.05349	238
chr1	162570228	162571192	ATACpk_peak_985	282	.	8.81708	31.3349	28.2675	353
chr1	162570227	162571192	ATACpk_peak_985	282	.	8.81708	31.3349	28.2675	353
chr1	162570227	162571192	ATACpk_peak_985	282	.	8.81708	31.3349	28.2675	353
chr1	162739880	162740863	ATACpk_peak_986	334	.	9.75507	36.6501	33.4809	613
chr1	162739880	162740863	ATACpk_peak_986	334	.	9.75507	36.6501	33.4809	613
chr1	162739880	162740863	ATACpk_peak_986	334	.	9.75507	36.6501	33.4809	613
chr1	163012637	163013300	ATACpk_peak_987	32	.	3.18916	5.49317	3.23067	317
chr1	163013037	163013300	ATACpk_peak_987	32	.	3.18916	5.49317	3.23067	317
chr1	163012571	163013186	ATACpk_peak_987	32	.	3.18916	5.49317	3.23067	317
chr1	163403414	163404133	ATACpk_peak_988	367	.	10.3179	39.9396	36.7101	330
chr1	163403414	163404133	ATACpk_peak_988	367	.	10.3179	39.9396	36.7101	330
chr1	163403451	163404045	ATACpk_peak_988	367	.	10.3179	39.9396	36.7101	330
chr1	163779328	163780045	ATACpk_peak_989	356	.	10.1303	38.8351	35.6252	347
chr1	163779424	163780045	ATACpk_peak_989	356	.	10.1303	38.8351	35.6252	347
chr1	163779387	163780045	ATACpk_peak_989	356	.	10.1303	38.8351	35.6252	347
chr1	163929339	163930474	ATACpk_peak_990	242	.	8.06669	27.2456	24.263	601
chr1	163929355	163930627	ATACpk_peak_990	242	.	8.06669	27.2456	24.263	601
chr1	163929537	163930462	ATACpk_peak_990	242	.	8.06669	27.2456	24.263	601
chr1	163994581	163995125	ATACpk_peak_991	132	.	5.81552	16	13.295	239
chr1	163994581	163995218	ATACpk_peak_991	132	.	5.81552	16	13.295	239
chr1	163994581	163995123	ATACpk_peak_991	132	.	5.81552	16	13.295	239
chr1	164078976	164079263	ATACpk_peak_992	21	.	2.81396	4.31522	2.14996	275
chr1	164078916	164079263	ATACpk_peak_992	21	.	2.81396	4.31522	2.14996	275
chr1	164248213	164249953	ATACpk_peak_993	1087	.	21.0109	112.866	108.784	853
chr1	164248213	164249972	ATACpk_peak_993	1087	.	21.0109	112.866	108.784	853
chr1	164248381	164249919	ATACpk_peak_993	1087	.	21.0109	112.866	108.784	853
chr1	164275521	164275870	ATACpk_peak_994	108	.	5.25273	13.4718	10.8435	65
chr1	164275521	164275870	ATACpk_peak_994	108	.	5.25273	13.4718	10.8435	65
chr1	164275521	164275870	ATACpk_peak_994	108	.	5.25273	13.4718	10.8435	65
chr1	164307133	164307845	ATACpk_peak_995	334	.	9.75507	36.6501	33.4809	426
chr1	164307133	164307845	ATACpk_peak_995	334	.	9.75507	36.6501	33.4809	426
chr1	164307133	164307845	ATACpk_peak_995	334	.	9.75507	36.6501	33.4809	426
chr1	164457643	164458940	ATACpk_peak_997	77	.	4.50234	10.3145	7.79751	446
chr1	164457859	164459009	ATACpk_peak_997	77	.	4.50234	10.3145	7.79751	446
chr1	164457662	164458825	ATACpk_peak_997	77	.	4.50234	10.3145	7.79751	446
chr1	164539783	164539991	ATACpk_peak_998	21	.	2.81396	4.31522	2.14996	415
chr1	165018622	165019129	ATACpk_peak_999	124	.	5.62792	15.1431	12.4635	209
chr1	165018622	165019129	ATACpk_peak_999	124	.	5.62792	15.1431	12.4635	209
chr1	165091576	165091994	ATACpk_peak_1000	50	.	3.75195	7.43695	5.05349	516
chr1	165091710	165091994	ATACpk_peak_1000	50	.	3.75195	7.43695	5.05349	516
chr1	165091563	165091994	ATACpk_peak_1000	50	.	3.75195	7.43695	5.05349	516
chr1	165193959	165194476	ATACpk_peak_1001	44	.	3.56435	6.76701	4.42147	195
chr1	165236169	165237218	ATACpk_peak_1002	456	.	11.8186	49.0453	45.6633	851
chr1	165236169	165237218	ATACpk_peak_1002	456	.	11.8186	49.0453	45.6633	851
chr1	165236504	165237218	ATACpk_peak_1002	456	.	11.8186	49.0453	45.6633	851
chr1	165459633	165461766	ATACpk_peak_1003	1187	.	22.3241	122.862	118.732	1034
chr1	165459652	165461747	ATACpk_peak_1003	1187	.	22.3241	122.862	118.732	1034
chr1	165459633	165461766	ATACpk_peak_1003	1187	.	22.3241	122.862	118.732	1034
chr1	165484083	165485890	ATACpk_peak_1004	194	.	7.1287	22.3596	19.4893	1081
chr1	165484083	165485718	ATACpk_peak_1004	194	.	7.1287	22.3596	19.4893	1081
[truncated: 50,420 more rows]

## Sheet: Arid1acKO_ATACblfilt_overlap
Chromosome	Start	End	Name	Score	Strand	Signal Value	pValue (-log10)	qValue (-log10)
chr1	3042419	3043234	ATACpk_peak_1	125	.	5.23651	14.8952	12.5135	350
chr1	3042402	3043236	ATACpk_peak_1	125	.	5.23651	14.8952	12.5135	350
chr1	3042369	3043236	ATACpk_peak_1	125	.	5.23651	14.8952	12.5135	350
chr1	3054365	3055094	ATACpk_peak_2	42	.	3.27282	6.31656	4.24321	265
chr1	3054365	3055094	ATACpk_peak_2	42	.	3.27282	6.31656	4.24321	265
chr1	3054365	3055094	ATACpk_peak_2	42	.	3.27282	6.31656	4.24321	265
chr1	3472078	3472389	ATACpk_peak_3	325	.	8.83662	35.2817	32.5555	158
chr1	3472078	3472389	ATACpk_peak_3	325	.	8.83662	35.2817	32.5555	158
chr1	3472078	3472389	ATACpk_peak_3	325	.	8.83662	35.2817	32.5555	158
chr1	3531636	3531998	ATACpk_peak_4	60	.	3.76374	8.23385	6.06661	64
chr1	3670788	3672461	ATACpk_peak_5	256	.	7.69113	28.284	25.6527	1171
chr1	3670873	3672550	ATACpk_peak_5	256	.	7.69113	28.284	25.6527	1171
chr1	3670788	3672550	ATACpk_peak_5	256	.	7.69113	28.284	25.6527	1171
chr1	4256350	4258680	ATACpk_peak_7	554	.	12.2731	58.4465	55.4716	2121
chr1	4256194	4258680	ATACpk_peak_7	554	.	12.2731	58.4465	55.4716	2121
chr1	4256321	4258680	ATACpk_peak_7	554	.	12.2731	58.4465	55.4716	2121
chr1	4352054	4353498	ATACpk_peak_8	256	.	7.69113	28.284	25.6527	422
chr1	4352054	4353326	ATACpk_peak_8	256	.	7.69113	28.284	25.6527	422
chr1	4352054	4353697	ATACpk_peak_8	256	.	7.69113	28.284	25.6527	422
chr1	4491891	4493419	ATACpk_peak_9	80	.	4.25467	10.3139	8.06645	461
chr1	4491893	4493419	ATACpk_peak_9	80	.	4.25467	10.3139	8.06645	461
chr1	4491891	4493419	ATACpk_peak_9	80	.	4.25467	10.3139	8.06645	461
chr1	4496477	4497919	ATACpk_peak_10	149	.	5.72744	17.3702	14.9306	609
chr1	4496477	4497919	ATACpk_peak_10	149	.	5.72744	17.3702	14.9306	609
chr1	4496477	4497919	ATACpk_peak_10	149	.	5.72744	17.3702	14.9306	609
chr1	4559770	4560848	ATACpk_peak_11	117	.	5.07287	14.0961	11.7349	273
chr1	4559784	4560848	ATACpk_peak_11	117	.	5.07287	14.0961	11.7349	273
chr1	4559770	4560848	ATACpk_peak_11	117	.	5.07287	14.0961	11.7349	273
chr1	4785469	4785976	ATACpk_peak_12	356	.	9.32754	38.4029	35.6377	236
chr1	4785469	4786018	ATACpk_peak_12	356	.	9.32754	38.4029	35.6377	236
chr1	4785469	4786018	ATACpk_peak_12	356	.	9.32754	38.4029	35.6377	236
chr1	4807517	4808123	ATACpk_peak_13	420	.	10.3094	44.8453	42.0059	268
chr1	4807517	4808207	ATACpk_peak_13	420	.	10.3094	44.8453	42.0059	268
chr1	4807517	4808207	ATACpk_peak_13	420	.	10.3094	44.8453	42.0059	268
chr1	4834999	4835345	ATACpk_peak_14	73	.	4.09103	9.60366	7.38177	181
chr1	4834999	4835345	ATACpk_peak_14	73	.	4.09103	9.60366	7.38177	181
chr1	4834999	4835345	ATACpk_peak_14	73	.	4.09103	9.60366	7.38177	181
chr1	4857169	4858406	ATACpk_peak_15	1071	.	18.9824	110.545	107.144	804
chr1	4857438	4858406	ATACpk_peak_15	1071	.	18.9824	110.545	107.144	804
chr1	4857157	4858406	ATACpk_peak_15	1071	.	18.9824	110.545	107.144	804
chr1	5072175	5072888	ATACpk_peak_16	80	.	4.25467	10.3139	8.06645	330
chr1	5072175	5072862	ATACpk_peak_16	80	.	4.25467	10.3139	8.06645	330
chr1	5072175	5072904	ATACpk_peak_16	80	.	4.25467	10.3139	8.06645	330
chr1	5082694	5083621	ATACpk_peak_17	486	.	11.2912	51.5335	48.6251	541
chr1	5082694	5083599	ATACpk_peak_17	486	.	11.2912	51.5335	48.6251	541
chr1	5082694	5083621	ATACpk_peak_17	486	.	11.2912	51.5335	48.6251	541
chr1	5109550	5114704	ATACpk_peak_18	520	.	11.7822	54.9631	52.0211	3148
chr1	5109517	5114704	ATACpk_peak_18	520	.	11.7822	54.9631	52.0211	3148
chr1	5109517	5114720	ATACpk_peak_18	520	.	11.7822	54.9631	52.0211	3148
chr1	5165934	5166327	ATACpk_peak_19	67	.	3.92739	8.91008	6.7148	207
chr1	5165998	5166391	ATACpk_peak_19	67	.	3.92739	8.91008	6.7148	207
chr1	6214155	6215419	ATACpk_peak_20	759	.	15.055	79.1078	75.9526	455
chr1	6214155	6215419	ATACpk_peak_20	759	.	15.055	79.1078	75.9526	455
chr1	6214155	6215419	ATACpk_peak_20	759	.	15.055	79.1078	75.9526	455
chr1	6358932	6359468	ATACpk_peak_21	102	.	4.74559	12.5391	10.2211	312
chr1	6359156	6359468	ATACpk_peak_21	102	.	4.74559	12.5391	10.2211	312
chr1	6382631	6383678	ATACpk_peak_22	441	.	10.6367	47.0485	44.1855	659
chr1	6382594	6383663	ATACpk_peak_22	441	.	10.6367	47.0485	44.1855	659
chr1	6382443	6383696	ATACpk_peak_22	441	.	10.6367	47.0485	44.1855	659
chr1	6437846	6438187	ATACpk_peak_23	26	.	2.7819	4.58445	2.62542	315
chr1	6441028	6442467	ATACpk_peak_24	209	.	6.87292	23.5555	20.9978	683
chr1	6440852	6442517	ATACpk_peak_24	209	.	6.87292	23.5555	20.9978	683
chr1	6440852	6442517	ATACpk_peak_24	209	.	6.87292	23.5555	20.9978	683
chr1	6959805	6960146	ATACpk_peak_25	102	.	4.74559	12.5391	10.2211	160
chr1	6959805	6960141	ATACpk_peak_25	102	.	4.74559	12.5391	10.2211	160
chr1	6959805	6960039	ATACpk_peak_25	102	.	4.74559	12.5391	10.2211	160
chr1	7088511	7089201	ATACpk_peak_26	335	.	9.00026	36.3143	33.5752	380
chr1	7088511	7089201	ATACpk_peak_26	335	.	9.00026	36.3143	33.5752	380
chr1	7088511	7089201	ATACpk_peak_26	335	.	9.00026	36.3143	33.5752	380
chr1	7293634	7294002	ATACpk_peak_27	21	.	2.61826	4.05299	2.13804	221
chr1	7293634	7294002	ATACpk_peak_27	21	.	2.61826	4.05299	2.13804	221
chr1	7293634	7294002	ATACpk_peak_27	21	.	2.61826	4.05299	2.13804	221
chr1	7334759	7335484	ATACpk_peak_28	48	.	3.43646	6.9363	4.82981	392
chr1	7334765	7335379	ATACpk_peak_28	48	.	3.43646	6.9363	4.82981	392
chr1	7334759	7335574	ATACpk_peak_28	48	.	3.43646	6.9363	4.82981	392
chr1	7387962	7388817	ATACpk_peak_29	60	.	3.76374	8.23385	6.06661	614
chr1	7387962	7388817	ATACpk_peak_29	60	.	3.76374	8.23385	6.06661	614
chr1	7387962	7388817	ATACpk_peak_29	60	.	3.76374	8.23385	6.06661	614
chr1	7396950	7398970	ATACpk_peak_30	1756	.	26.8371	179.529	175.666	1253
chr1	7396796	7398968	ATACpk_peak_30	1756	.	26.8371	179.529	175.666	1253
chr1	7396736	7398998	ATACpk_peak_30	1756	.	26.8371	179.529	175.666	1253
chr1	8190213	8190590	ATACpk_peak_32	125	.	5.23651	14.8952	12.5135	71
chr1	8190213	8190663	ATACpk_peak_32	125	.	5.23651	14.8952	12.5135	71
chr1	8190213	8190663	ATACpk_peak_32	125	.	5.23651	14.8952	12.5135	71
chr1	8196644	8197004	ATACpk_peak_33	67	.	3.92739	8.91008	6.7148	383
chr1	8196529	8197004	ATACpk_peak_33	67	.	3.92739	8.91008	6.7148	383
chr1	9442127	9442527	ATACpk_peak_35	54	.	3.6001	7.57567	5.43791	66
chr1	9442140	9442554	ATACpk_peak_35	54	.	3.6001	7.57567	5.43791	66
chr1	9544735	9546690	ATACpk_peak_36	1291	.	21.6006	132.729	129.161	633
chr1	9544852	9546659	ATACpk_peak_36	1291	.	21.6006	132.729	129.161	633
chr1	9544735	9546690	ATACpk_peak_36	1291	.	21.6006	132.729	129.161	633
chr1	9548490	9548625	ATACpk_peak_37	42	.	3.27282	6.31656	4.24321	239
chr1	9548490	9548800	ATACpk_peak_37	42	.	3.27282	6.31656	4.24321	239
chr1	9548490	9548756	ATACpk_peak_37	42	.	3.27282	6.31656	4.24321	239
chr1	9610061	9610716	ATACpk_peak_38	166	.	6.05472	19.0814	16.6059	528
chr1	9610074	9610708	ATACpk_peak_38	166	.	6.05472	19.0814	16.6059	528
chr1	9610061	9610716	ATACpk_peak_38	166	.	6.05472	19.0814	16.6059	528
chr1	9658479	9659165	ATACpk_peak_39	54	.	3.6001	7.57567	5.43791	172
chr1	9658396	9659165	ATACpk_peak_39	54	.	3.6001	7.57567	5.43791	172
chr1	9699540	9701294	ATACpk_peak_40	1564	.	24.7098	160.157	156.405	1101
chr1	9699540	9701783	ATACpk_peak_40	1564	.	24.7098	160.157	156.405	1101
chr1	9699540	9701783	ATACpk_peak_40	1564	.	24.7098	160.157	156.405	1101
chr1	9747072	9749042	ATACpk_peak_41	1263	.	21.2733	129.908	126.361	1385
chr1	9747072	9749234	ATACpk_peak_41	1263	.	21.2733	129.908	126.361	1385
chr1	9747072	9749414	ATACpk_peak_41	1263	.	21.2733	129.908	126.361	1385
chr1	9768259	9769214	ATACpk_peak_42	247	.	7.52749	27.3193	24.7022	698
chr1	9768259	9769337	ATACpk_peak_42	247	.	7.52749	27.3193	24.7022	698
chr1	9768259	9769216	ATACpk_peak_42	247	.	7.52749	27.3193	24.7022	698
chr1	9797927	9798505	ATACpk_peak_43	117	.	5.07287	14.0961	11.7349	556
chr1	9797915	9798648	ATACpk_peak_43	117	.	5.07287	14.0961	11.7349	556
chr1	9797874	9798648	ATACpk_peak_43	117	.	5.07287	14.0961	11.7349	556
chr1	9847969	9848930	ATACpk_peak_44	508	.	11.6185	53.8138	50.8831	370
chr1	9847969	9848930	ATACpk_peak_44	508	.	11.6185	53.8138	50.8831	370
chr1	9847969	9848930	ATACpk_peak_44	508	.	11.6185	53.8138	50.8831	370
chr1	9874273	9874598	ATACpk_peak_45	73	.	4.09103	9.60366	7.38177	125
chr1	9874273	9874598	ATACpk_peak_45	73	.	4.09103	9.60366	7.38177	125
chr1	9874273	9874598	ATACpk_peak_45	73	.	4.09103	9.60366	7.38177	125
chr1	9907567	9909443	ATACpk_peak_46	366	.	9.49118	39.4585	36.6804	1216
chr1	9907542	9909443	ATACpk_peak_46	366	.	9.49118	39.4585	36.6804	1216
chr1	9907397	9909443	ATACpk_peak_46	366	.	9.49118	39.4585	36.6804	1216
chr1	9943429	9945011	ATACpk_peak_47	951	.	17.5096	98.4777	95.1695	786
chr1	9943360	9945024	ATACpk_peak_47	951	.	17.5096	98.4777	95.1695	786
chr1	9943360	9945133	ATACpk_peak_47	951	.	17.5096	98.4777	95.1695	786
chr1	9967059	9968487	ATACpk_peak_49	578	.	12.6004	60.7976	57.8004	552
chr1	9967059	9968487	ATACpk_peak_49	578	.	12.6004	60.7976	57.8004	552
chr1	9967059	9968487	ATACpk_peak_49	578	.	12.6004	60.7976	57.8004	552
chr1	10008757	10009421	ATACpk_peak_50	133	.	5.40015	15.7075	13.306	413
chr1	10008757	10009421	ATACpk_peak_50	133	.	5.40015	15.7075	13.306	413
chr1	10008757	10009421	ATACpk_peak_50	133	.	5.40015	15.7075	13.306	413
chr1	10037527	10040276	ATACpk_peak_51	1084	.	19.146	111.905	108.494	2308
chr1	10037527	10040756	ATACpk_peak_51	1084	.	19.146	111.905	108.494	2308
chr1	10037527	10040756	ATACpk_peak_51	1084	.	19.146	111.905	108.494	2308
chr1	10100599	10101808	ATACpk_peak_52	285	.	8.18205	31.232	28.5588	306
chr1	10100599	10101867	ATACpk_peak_52	285	.	8.18205	31.232	28.5588	306
chr1	10100610	10101874	ATACpk_peak_52	285	.	8.18205	31.232	28.5588	306
chr1	10231797	10233441	ATACpk_peak_55	938	.	17.346	97.1566	93.8588	1248
chr1	10231797	10233441	ATACpk_peak_55	938	.	17.346	97.1566	93.8588	1248
chr1	10231797	10233441	ATACpk_peak_55	938	.	17.346	97.1566	93.8588	1248
chr1	10478434	10479847	ATACpk_peak_56	141	.	5.5638	16.5326	14.1119	894
chr1	10478351	10479921	ATACpk_peak_56	141	.	5.5638	16.5326	14.1119	894
chr1	10478351	10479999	ATACpk_peak_56	141	.	5.5638	16.5326	14.1119	894
chr1	10695084	10695855	ATACpk_peak_57	117	.	5.07287	14.0961	11.7349	573
chr1	10694932	10695855	ATACpk_peak_57	117	.	5.07287	14.0961	11.7349	573
chr1	10694905	10695855	ATACpk_peak_57	117	.	5.07287	14.0961	11.7349	573
chr1	11327468	11327763	ATACpk_peak_58	16	.	2.45462	3.54652	1.68009	28
chr1	11327336	11327795	ATACpk_peak_58	16	.	2.45462	3.54652	1.68009	28
chr1	11327336	11327795	ATACpk_peak_58	16	.	2.45462	3.54652	1.68009	28
chr1	11328720	11329807	ATACpk_peak_59	219	.	7.03657	24.4818	21.9087	778
chr1	11328101	11329807	ATACpk_peak_59	219	.	7.03657	24.4818	21.9087	778
chr1	11328101	11329807	ATACpk_peak_59	219	.	7.03657	24.4818	21.9087	778
chr1	12233214	12233597	ATACpk_peak_60	60	.	3.76374	8.23385	6.06661	233
chr1	12233214	12233903	ATACpk_peak_60	60	.	3.76374	8.23385	6.06661	233
chr1	12233214	12233893	ATACpk_peak_60	60	.	3.76374	8.23385	6.06661	233
chr1	12234196	12234551	ATACpk_peak_61	31	.	2.94554	5.13962	3.13965	346
chr1	12578816	12579603	ATACpk_peak_63	174	.	6.21836	19.9544	17.4617	371
chr1	12578816	12579603	ATACpk_peak_63	174	.	6.21836	19.9544	17.4617	371
chr1	12578816	12579603	ATACpk_peak_63	174	.	6.21836	19.9544	17.4617	371
chr1	12657473	12657811	ATACpk_peak_64	228	.	7.20021	25.418	22.83	183
chr1	12657473	12657811	ATACpk_peak_64	228	.	7.20021	25.418	22.83	183
chr1	12657473	12657811	ATACpk_peak_64	228	.	7.20021	25.418	22.83	183
chr1	12850953	12851881	ATACpk_peak_65	94	.	4.58195	11.7822	9.48674	669
chr1	12850953	12851881	ATACpk_peak_65	94	.	4.58195	11.7822	9.48674	669
chr1	12850953	12851881	ATACpk_peak_65	94	.	4.58195	11.7822	9.48674	669
chr1	13069204	13071011	ATACpk_peak_66	192	.	6.54564	21.7337	19.2077	578
chr1	13069204	13070928	ATACpk_peak_66	192	.	6.54564	21.7337	19.2077	578
chr1	13069204	13070981	ATACpk_peak_66	192	.	6.54564	21.7337	19.2077	578
chr1	13128267	13128585	ATACpk_peak_67	31	.	2.94554	5.13962	3.13965	196
chr1	13128267	13128585	ATACpk_peak_67	31	.	2.94554	5.13962	3.13965	196
chr1	13128267	13128585	ATACpk_peak_67	31	.	2.94554	5.13962	3.13965	196
chr1	13337931	13339027	ATACpk_peak_68	166	.	6.05472	19.0814	16.6059	568
chr1	13337740	13339027	ATACpk_peak_68	166	.	6.05472	19.0814	16.6059	568
chr1	13337823	13338897	ATACpk_peak_68	166	.	6.05472	19.0814	16.6059	568
chr1	13371847	13374649	ATACpk_peak_69	1667	.	25.8553	170.53	166.717	704
chr1	13371847	13374649	ATACpk_peak_69	1667	.	25.8553	170.53	166.717	704
chr1	13372084	13374649	ATACpk_peak_69	1667	.	25.8553	170.53	166.717	704
chr1	13589001	13590805	ATACpk_peak_70	554	.	12.2731	58.4465	55.4716	873
chr1	13589001	13590805	ATACpk_peak_70	554	.	12.2731	58.4465	55.4716	873
chr1	13589001	13590805	ATACpk_peak_70	554	.	12.2731	58.4465	55.4716	873
chr1	13591739	13591764	ATACpk_peak_71	26	.	2.7819	4.58445	2.62542	70
chr1	13591571	13591764	ATACpk_peak_71	26	.	2.7819	4.58445	2.62542	70
chr1	13660075	13660858	ATACpk_peak_73	325	.	8.83662	35.2817	32.5555	448
chr1	13660075	13660844	ATACpk_peak_73	325	.	8.83662	35.2817	32.5555	448
chr1	13660075	13660858	ATACpk_peak_73	325	.	8.83662	35.2817	32.5555	448
chr1	14506665	14507107	ATACpk_peak_75	60	.	3.76374	8.23385	6.06661	77
chr1	14755031	14756192	ATACpk_peak_76	157	.	5.89108	18.2199	15.7621	423
chr1	14755186	14756163	ATACpk_peak_76	157	.	5.89108	18.2199	15.7621	423
chr1	14755179	14756035	ATACpk_peak_76	157	.	5.89108	18.2199	15.7621	423
chr1	15286434	15287029	ATACpk_peak_78	80	.	4.25467	10.3139	8.06645	272
chr1	15286443	15287115	ATACpk_peak_78	80	.	4.25467	10.3139	8.06645	272
chr1	15742780	15743061	ATACpk_peak_79	31	.	2.94554	5.13962	3.13965	460
chr1	15742780	15743187	ATACpk_peak_79	31	.	2.94554	5.13962	3.13965	460
chr1	15742780	15743321	ATACpk_peak_79	31	.	2.94554	5.13962	3.13965	460
chr1	15792459	15793335	ATACpk_peak_80	60	.	3.76374	8.23385	6.06661	284
chr1	15792509	15793335	ATACpk_peak_80	60	.	3.76374	8.23385	6.06661	284
chr1	15792459	15793335	ATACpk_peak_80	60	.	3.76374	8.23385	6.06661	284
chr1	15794171	15794815	ATACpk_peak_81	109	.	4.90923	13.3106	10.9706	513
chr1	15794171	15794815	ATACpk_peak_81	109	.	4.90923	13.3106	10.9706	513
chr1	15794171	15794815	ATACpk_peak_81	109	.	4.90923	13.3106	10.9706	513
chr1	15805111	15806393	ATACpk_peak_82	661	.	13.7458	69.1991	66.1262	631
chr1	15804955	15806393	ATACpk_peak_82	661	.	13.7458	69.1991	66.1262	631
chr1	15804955	15806393	ATACpk_peak_82	661	.	13.7458	69.1991	66.1262	631
chr1	16025881	16026982	ATACpk_peak_83	192	.	6.54564	21.7337	19.2077	651
chr1	16025948	16026982	ATACpk_peak_83	192	.	6.54564	21.7337	19.2077	651
chr1	16025881	16026982	ATACpk_peak_83	192	.	6.54564	21.7337	19.2077	651
chr1	16070564	16074688	ATACpk_peak_84	209	.	6.87292	23.5555	20.9978	2868
chr1	16070846	16074688	ATACpk_peak_84	209	.	6.87292	23.5555	20.9978	2868
chr1	16070564	16074625	ATACpk_peak_84	209	.	6.87292	23.5555	20.9978	2868
chr1	16086923	16087727	ATACpk_peak_85	166	.	6.05472	19.0814	16.6059	366
chr1	16086920	16087757	ATACpk_peak_85	166	.	6.05472	19.0814	16.6059	366
chr1	16086920	16087958	ATACpk_peak_85	166	.	6.05472	19.0814	16.6059	366
chr1	16089757	16089946	ATACpk_peak_86	54	.	3.6001	7.57567	5.43791	471
chr1	16089708	16089946	ATACpk_peak_86	54	.	3.6001	7.57567	5.43791	471
chr1	16089334	16089824	ATACpk_peak_86	54	.	3.6001	7.57567	5.43791	471
chr1	16092705	16093893	ATACpk_peak_87	578	.	12.6004	60.7976	57.8004	1282
chr1	16092684	16093893	ATACpk_peak_87	578	.	12.6004	60.7976	57.8004	1282
chr1	16092550	16093893	ATACpk_peak_87	578	.	12.6004	60.7976	57.8004	1282
chr1	16103859	16106135	ATACpk_peak_88	497	.	11.4549	52.6706	49.7511	1518
chr1	16103859	16106135	ATACpk_peak_88	497	.	11.4549	52.6706	49.7511	1518
chr1	16103859	16106135	ATACpk_peak_88	497	.	11.4549	52.6706	49.7511	1518
chr1	16518646	16519270	ATACpk_peak_89	157	.	5.89108	18.2199	15.7621	361
chr1	16518646	16519284	ATACpk_peak_89	157	.	5.89108	18.2199	15.7621	361
chr1	16518646	16519276	ATACpk_peak_89	157	.	5.89108	18.2199	15.7621	361
chr1	16519753	16520061	ATACpk_peak_90	48	.	3.43646	6.9363	4.82981	177
chr1	16519708	16520061	ATACpk_peak_90	48	.	3.43646	6.9363	4.82981	177
chr1	16519732	16520061	ATACpk_peak_90	48	.	3.43646	6.9363	4.82981	177
chr1	16592885	16593573	ATACpk_peak_91	125	.	5.23651	14.8952	12.5135	235
chr1	16592838	16593573	ATACpk_peak_91	125	.	5.23651	14.8952	12.5135	235
chr1	16592776	16593573	ATACpk_peak_91	125	.	5.23651	14.8952	12.5135	235
chr1	16618571	16619674	ATACpk_peak_92	747	.	14.8913	77.8523	74.7072	763
chr1	16618523	16619714	ATACpk_peak_92	747	.	14.8913	77.8523	74.7072	763
chr1	16618523	16619921	ATACpk_peak_92	747	.	14.8913	77.8523	74.7072	763
chr1	16656373	16657568	ATACpk_peak_93	697	.	14.2368	72.878	69.7738	539
chr1	16656414	16657550	ATACpk_peak_93	697	.	14.2368	72.878	69.7738	539
chr1	16656373	16657568	ATACpk_peak_93	697	.	14.2368	72.878	69.7738	539
chr1	16664835	16665884	ATACpk_peak_94	377	.	9.65482	40.5215	37.7307	401
chr1	16664970	16665884	ATACpk_peak_94	377	.	9.65482	40.5215	37.7307	401
chr1	16664835	16665875	ATACpk_peak_94	377	.	9.65482	40.5215	37.7307	401
chr1	16688297	16688800	ATACpk_peak_95	67	.	3.92739	8.91008	6.7148	454
chr1	16688297	16688798	ATACpk_peak_95	67	.	3.92739	8.91008	6.7148	454
chr1	16710855	16711153	ATACpk_peak_96	21	.	2.61826	4.05299	2.13804	181
chr1	16710855	16711153	ATACpk_peak_96	21	.	2.61826	4.05299	2.13804	181
chr1	16710855	16711153	ATACpk_peak_96	21	.	2.61826	4.05299	2.13804	181
chr1	16953274	16953630	ATACpk_peak_97	26	.	2.7819	4.58445	2.62542	115
chr1	16953274	16953592	ATACpk_peak_97	26	.	2.7819	4.58445	2.62542	115
chr1	17097003	17098259	ATACpk_peak_98	452	.	10.8003	48.1601	45.2856	1054
chr1	17096888	17098214	ATACpk_peak_98	452	.	10.8003	48.1601	45.2856	1054
chr1	17096818	17098320	ATACpk_peak_98	452	.	10.8003	48.1601	45.2856	1054
chr1	17122998	17124642	ATACpk_peak_99	166	.	6.05472	19.0814	16.6059	724
chr1	17122998	17124642	ATACpk_peak_99	166	.	6.05472	19.0814	16.6059	724
chr1	17122998	17124642	ATACpk_peak_99	166	.	6.05472	19.0814	16.6059	724
chr1	18053754	18054341	ATACpk_peak_100	54	.	3.6001	7.57567	5.43791	121
chr1	18053754	18054349	ATACpk_peak_100	54	.	3.6001	7.57567	5.43791	121
chr1	18053754	18054349	ATACpk_peak_100	54	.	3.6001	7.57567	5.43791	121
chr1	18057980	18058688	ATACpk_peak_101	125	.	5.23651	14.8952	12.5135	547
chr1	18057792	18058712	ATACpk_peak_101	125	.	5.23651	14.8952	12.5135	547
chr1	18057756	18058712	ATACpk_peak_101	125	.	5.23651	14.8952	12.5135	547
chr1	18078485	18079085	ATACpk_peak_102	67	.	3.92739	8.91008	6.7148	416
chr1	18078485	18079085	ATACpk_peak_102	67	.	3.92739	8.91008	6.7148	416
chr1	18078485	18078728	ATACpk_peak_102	67	.	3.92739	8.91008	6.7148	416
chr1	18278218	18279124	ATACpk_peak_103	133	.	5.40015	15.7075	13.306	618
chr1	18278218	18279124	ATACpk_peak_103	133	.	5.40015	15.7075	13.306	618
chr1	18278218	18278921	ATACpk_peak_103	133	.	5.40015	15.7075	13.306	618
chr1	18391958	18392350	ATACpk_peak_104	36	.	3.10918	5.71735	3.67934	91
chr1	18478766	18479552	ATACpk_peak_105	31	.	2.94554	5.13962	3.13965	728
chr1	18537367	18538176	ATACpk_peak_106	73	.	4.09103	9.60366	7.38177	584
chr1	18537362	18538176	ATACpk_peak_106	73	.	4.09103	9.60366	7.38177	584
chr1	18537362	18538176	ATACpk_peak_106	73	.	4.09103	9.60366	7.38177	584
chr1	19605653	19606022	ATACpk_peak_107	21	.	2.61826	4.05299	2.13804	92
chr1	20432528	20433399	ATACpk_peak_108	60	.	3.76374	8.23385	6.06661	258
chr1	20432525	20433399	ATACpk_peak_108	60	.	3.76374	8.23385	6.06661	258
chr1	20432542	20433399	ATACpk_peak_108	60	.	3.76374	8.23385	6.06661	258
chr1	20487002	20487307	ATACpk_peak_109	80	.	4.25467	10.3139	8.06645	246
chr1	20486750	20487338	ATACpk_peak_109	80	.	4.25467	10.3139	8.06645	246
chr1	20486649	20487338	ATACpk_peak_109	80	.	4.25467	10.3139	8.06645	246
chr1	20702749	20703439	ATACpk_peak_110	31	.	2.94554	5.13962	3.13965	628
chr1	20819895	20820523	ATACpk_peak_111	759	.	15.055	79.1078	75.9526	428
chr1	20819895	20820525	ATACpk_peak_111	759	.	15.055	79.1078	75.9526	428
chr1	20819895	20820525	ATACpk_peak_111	759	.	15.055	79.1078	75.9526	428
chr1	20867823	20869424	ATACpk_peak_112	141	.	5.5638	16.5326	14.1119	816
chr1	20867737	20869126	ATACpk_peak_112	141	.	5.5638	16.5326	14.1119	816
chr1	20867814	20869413	ATACpk_peak_112	141	.	5.5638	16.5326	14.1119	816
chr1	20917146	20918490	ATACpk_peak_113	117	.	5.07287	14.0961	11.7349	723
chr1	20917146	20918075	ATACpk_peak_113	117	.	5.07287	14.0961	11.7349	723
chr1	20917146	20918490	ATACpk_peak_113	117	.	5.07287	14.0961	11.7349	723
chr1	20934406	20935404	ATACpk_peak_114	48	.	3.43646	6.9363	4.82981	76
chr1	20934406	20935364	ATACpk_peak_114	48	.	3.43646	6.9363	4.82981	76
chr1	20934406	20935404	ATACpk_peak_114	48	.	3.43646	6.9363	4.82981	76
chr1	20951118	20952438	ATACpk_peak_115	430	.	10.473	45.9435	43.0924	531
chr1	20951118	20952548	ATACpk_peak_115	430	.	10.473	45.9435	43.0924	531
chr1	20951118	20952548	ATACpk_peak_115	430	.	10.473	45.9435	43.0924	531
chr1	20997399	20998186	ATACpk_peak_116	54	.	3.6001	7.57567	5.43791	628
chr1	20997399	20998798	ATACpk_peak_116	54	.	3.6001	7.57567	5.43791	628
chr1	20997399	20998025	ATACpk_peak_116	54	.	3.6001	7.57567	5.43791	628
chr1	20998531	20998894	ATACpk_peak_116	54	.	3.6001	7.57567	5.43791	628
chr1	21078344	21079844	ATACpk_peak_117	1084	.	19.146	111.905	108.494	953
chr1	21078344	21079844	ATACpk_peak_117	1084	.	19.146	111.905	108.494	953
chr1	21078344	21079844	ATACpk_peak_117	1084	.	19.146	111.905	108.494	953
chr1	21121484	21121844	ATACpk_peak_118	266	.	7.85477	29.2578	26.6125	265
chr1	21121484	21121844	ATACpk_peak_118	266	.	7.85477	29.2578	26.6125	265
chr1	21218515	21218841	ATACpk_peak_119	67	.	3.92739	8.91008	6.7148	206
chr1	21218515	21218841	ATACpk_peak_119	67	.	3.92739	8.91008	6.7148	206
chr1	21218515	21218841	ATACpk_peak_119	67	.	3.92739	8.91008	6.7148	206
chr1	21460964	21461775	ATACpk_peak_120	149	.	5.72744	17.3702	14.9306	428
chr1	21460998	21461775	ATACpk_peak_120	149	.	5.72744	17.3702	14.9306	428
chr1	21460993	21461775	ATACpk_peak_120	149	.	5.72744	17.3702	14.9306	428
chr1	21904130	21905140	ATACpk_peak_121	109	.	4.90923	13.3106	10.9706	458
chr1	21904130	21904968	ATACpk_peak_121	109	.	4.90923	13.3106	10.9706	458
chr1	21904130	21905115	ATACpk_peak_121	109	.	4.90923	13.3106	10.9706	458
chr1	22533222	22533870	ATACpk_peak_123	117	.	5.07287	14.0961	11.7349	447
chr1	22533324	22533886	ATACpk_peak_123	117	.	5.07287	14.0961	11.7349	447
chr1	22533213	22533886	ATACpk_peak_123	117	.	5.07287	14.0961	11.7349	447
chr1	22959789	22960183	ATACpk_peak_124	67	.	3.92739	8.91008	6.7148	265
chr1	22959789	22960183	ATACpk_peak_124	67	.	3.92739	8.91008	6.7148	265
chr1	23101765	23102354	ATACpk_peak_125	237	.	7.36385	26.3639	23.7612	485
chr1	23101765	23102354	ATACpk_peak_125	237	.	7.36385	26.3639	23.7612	485
chr1	23101765	23102354	ATACpk_peak_125	237	.	7.36385	26.3639	23.7612	485
chr1	23115769	23116116	ATACpk_peak_126	73	.	4.09103	9.60366	7.38177	195
chr1	23115827	23116116	ATACpk_peak_126	73	.	4.09103	9.60366	7.38177	195
chr1	23115769	23116116	ATACpk_peak_126	73	.	4.09103	9.60366	7.38177	195
chr1	23255514	23257236	ATACpk_peak_127	1816	.	27.4917	185.581	181.686	680
chr1	23255514	23257236	ATACpk_peak_127	1816	.	27.4917	185.581	181.686	680
chr1	23255514	23257236	ATACpk_peak_127	1816	.	27.4917	185.581	181.686	680
chr1	23382740	23383201	ATACpk_peak_128	42	.	3.27282	6.31656	4.24321	86
chr1	23382893	23383201	ATACpk_peak_128	42	.	3.27282	6.31656	4.24321	86
chr1	23382781	23383201	ATACpk_peak_128	42	.	3.27282	6.31656	4.24321	86
chr1	23556362	23557147	ATACpk_peak_129	117	.	5.07287	14.0961	11.7349	600
chr1	23556477	23557163	ATACpk_peak_129	117	.	5.07287	14.0961	11.7349	600
chr1	23556362	23557123	ATACpk_peak_129	117	.	5.07287	14.0961	11.7349	600
chr1	23673368	23674389	ATACpk_peak_130	60	.	3.76374	8.23385	6.06661	661
chr1	23673373	23674474	ATACpk_peak_130	60	.	3.76374	8.23385	6.06661	661
chr1	23673368	23674541	ATACpk_peak_130	60	.	3.76374	8.23385	6.06661	661
chr1	23762667	23763395	ATACpk_peak_131	109	.	4.90923	13.3106	10.9706	634
chr1	23762271	23763386	ATACpk_peak_131	109	.	4.90923	13.3106	10.9706	634
chr1	23762271	23763400	ATACpk_peak_131	109	.	4.90923	13.3106	10.9706	634
chr1	23793353	23793816	ATACpk_peak_132	42	.	3.27282	6.31656	4.24321	71
chr1	23793389	23793801	ATACpk_peak_132	42	.	3.27282	6.31656	4.24321	71
chr1	23793353	23793770	ATACpk_peak_132	42	.	3.27282	6.31656	4.24321	71
chr1	23826522	23827325	ATACpk_peak_133	67	.	3.92739	8.91008	6.7148	78
chr1	23826522	23827327	ATACpk_peak_133	67	.	3.92739	8.91008	6.7148	78
chr1	23826522	23827327	ATACpk_peak_133	67	.	3.92739	8.91008	6.7148	78
chr1	23921700	23922528	ATACpk_peak_134	109	.	4.90923	13.3106	10.9706	692
chr1	23921700	23922528	ATACpk_peak_134	109	.	4.90923	13.3106	10.9706	692
chr1	23921700	23922528	ATACpk_peak_134	109	.	4.90923	13.3106	10.9706	692
chr1	24005250	24007343	ATACpk_peak_136	589	.	12.764	61.9816	58.9732	337
chr1	24007707	24008079	ATACpk_peak_136	589	.	12.764	61.9816	58.9732	337
chr1	24005250	24006784	ATACpk_peak_136	589	.	12.764	61.9816	58.9732	337
chr1	24007483	24008079	ATACpk_peak_136	589	.	12.764	61.9816	58.9732	337
chr1	24005250	24008079	ATACpk_peak_136	589	.	12.764	61.9816	58.9732	337
chr1	24008746	24009200	ATACpk_peak_137	26	.	2.7819	4.58445	2.62542	35
chr1	24008746	24009200	ATACpk_peak_137	26	.	2.7819	4.58445	2.62542	35
chr1	24008746	24009200	ATACpk_peak_137	26	.	2.7819	4.58445	2.62542	35
chr1	24009576	24010167	ATACpk_peak_138	42	.	3.27282	6.31656	4.24321	250
chr1	24009576	24010234	ATACpk_peak_138	42	.	3.27282	6.31656	4.24321	250
chr1	24045222	24045913	ATACpk_peak_139	166	.	6.05472	19.0814	16.6059	652
chr1	24044847	24045908	ATACpk_peak_139	166	.	6.05472	19.0814	16.6059	652
chr1	24044847	24045913	ATACpk_peak_139	166	.	6.05472	19.0814	16.6059	652
chr1	24088831	24089473	ATACpk_peak_140	73	.	4.09103	9.60366	7.38177	595
chr1	24089140	24089650	ATACpk_peak_140	73	.	4.09103	9.60366	7.38177	595
chr1	24088729	24089672	ATACpk_peak_140	73	.	4.09103	9.60366	7.38177	595
chr1	24099248	24101303	ATACpk_peak_141	1667	.	25.8553	170.53	166.717	1096
chr1	24099254	24101303	ATACpk_peak_141	1667	.	25.8553	170.53	166.717	1096
chr1	24099291	24101303	ATACpk_peak_141	1667	.	25.8553	170.53	166.717	1096
chr1	24289355	24289954	ATACpk_peak_142	73	.	4.09103	9.60366	7.38177	623
chr1	24289191	24289532	ATACpk_peak_142	73	.	4.09103	9.60366	7.38177	623
chr1	24288991	24289808	ATACpk_peak_142	73	.	4.09103	9.60366	7.38177	623
chr1	24338128	24338581	ATACpk_peak_143	54	.	3.6001	7.57567	5.43791	660
chr1	24338292	24338581	ATACpk_peak_143	54	.	3.6001	7.57567	5.43791	660
chr1	24337844	24338581	ATACpk_peak_143	54	.	3.6001	7.57567	5.43791	660
chr1	24678162	24679765	ATACpk_peak_145	1348	.	22.2552	138.41	134.8	669
chr1	24677988	24679791	ATACpk_peak_145	1348	.	22.2552	138.41	134.8	669
chr1	24677988	24679791	ATACpk_peak_145	1348	.	22.2552	138.41	134.8	669
chr1	24701435	24701812	ATACpk_peak_146	54	.	3.6001	7.57567	5.43791	315
chr1	24701372	24701803	ATACpk_peak_146	54	.	3.6001	7.57567	5.43791	315
chr1	24784950	24785395	ATACpk_peak_147	219	.	7.03657	24.4818	21.9087	131
chr1	24784950	24785323	ATACpk_peak_147	219	.	7.03657	24.4818	21.9087	131
chr1	24784950	24785275	ATACpk_peak_147	219	.	7.03657	24.4818	21.9087	131
chr1	25017685	25018089	ATACpk_peak_148	67	.	3.92739	8.91008	6.7148	796
chr1	25662258	25663207	ATACpk_peak_150	94	.	4.58195	11.7822	9.48674	367
chr1	25662197	25663207	ATACpk_peak_150	94	.	4.58195	11.7822	9.48674	367
chr1	25662197	25663195	ATACpk_peak_150	94	.	4.58195	11.7822	9.48674	367
chr1	25829505	25830565	ATACpk_peak_151	67	.	3.92739	8.91008	6.7148	463
chr1	25829505	25830572	ATACpk_peak_151	67	.	3.92739	8.91008	6.7148	463
chr1	25829505	25830367	ATACpk_peak_151	67	.	3.92739	8.91008	6.7148	463
chr1	25970696	25970933	ATACpk_peak_152	73	.	4.09103	9.60366	7.38177	328
chr1	25970522	25970933	ATACpk_peak_152	73	.	4.09103	9.60366	7.38177	328
chr1	25970537	25970933	ATACpk_peak_152	73	.	4.09103	9.60366	7.38177	328
chr1	26616230	26617015	ATACpk_peak_153	117	.	5.07287	14.0961	11.7349	654
chr1	26616501	26617232	ATACpk_peak_153	117	.	5.07287	14.0961	11.7349	654
chr1	26616230	26617018	ATACpk_peak_153	117	.	5.07287	14.0961	11.7349	654
chr1	26938632	26938892	ATACpk_peak_155	26	.	2.7819	4.58445	2.62542	185
chr1	27194585	27194779	ATACpk_peak_156	31	.	2.94554	5.13962	3.13965	525
chr1	27194585	27194783	ATACpk_peak_156	31	.	2.94554	5.13962	3.13965	525
chr1	27246701	27247124	ATACpk_peak_157	80	.	4.25467	10.3139	8.06645	213
chr1	27246701	27247124	ATACpk_peak_157	80	.	4.25467	10.3139	8.06645	213
chr1	27246701	27247124	ATACpk_peak_157	80	.	4.25467	10.3139	8.06645	213
chr1	28287731	28288870	ATACpk_peak_158	109	.	4.90923	13.3106	10.9706	601
chr1	28287731	28288828	ATACpk_peak_158	109	.	4.90923	13.3106	10.9706	601
chr1	28287852	28288585	ATACpk_peak_158	109	.	4.90923	13.3106	10.9706	601
chr1	28801335	28801673	ATACpk_peak_159	31	.	2.94554	5.13962	3.13965	150
chr1	30042472	30043124	ATACpk_peak_160	157	.	5.89108	18.2199	15.7621	718
chr1	30042075	30043216	ATACpk_peak_160	157	.	5.89108	18.2199	15.7621	718
chr1	30042075	30043257	ATACpk_peak_160	157	.	5.89108	18.2199	15.7621	718
chr1	30262544	30262824	ATACpk_peak_161	73	.	4.09103	9.60366	7.38177	363
chr1	30262353	30262826	ATACpk_peak_161	73	.	4.09103	9.60366	7.38177	363
chr1	30371147	30371454	ATACpk_peak_162	31	.	2.94554	5.13962	3.13965	175
chr1	30371045	30371461	ATACpk_peak_162	31	.	2.94554	5.13962	3.13965	175
chr1	30398568	30399508	ATACpk_peak_163	60	.	3.76374	8.23385	6.06661	372
chr1	30398568	30399495	ATACpk_peak_163	60	.	3.76374	8.23385	6.06661	372
chr1	30398568	30399508	ATACpk_peak_163	60	.	3.76374	8.23385	6.06661	372
chr1	30872865	30874869	ATACpk_peak_164	938	.	17.346	97.1566	93.8588	606
chr1	30872886	30874869	ATACpk_peak_164	938	.	17.346	97.1566	93.8588	606
chr1	30872909	30874869	ATACpk_peak_164	938	.	17.346	97.1566	93.8588	606
chr1	30938598	30938874	ATACpk_peak_165	31	.	2.94554	5.13962	3.13965	38
chr1	30938598	30938874	ATACpk_peak_165	31	.	2.94554	5.13962	3.13965	38
chr1	30948798	30950733	ATACpk_peak_166	1786	.	27.1644	182.549	178.671	984
chr1	30948798	30950616	ATACpk_peak_166	1786	.	27.1644	182.549	178.671	984
chr1	30948798	30950733	ATACpk_peak_166	1786	.	27.1644	182.549	178.671	984
chr1	31075312	31075668	ATACpk_peak_167	26	.	2.7819	4.58445	2.62542	52
chr1	31075312	31075668	ATACpk_peak_167	26	.	2.7819	4.58445	2.62542	52
chr1	31075312	31075668	ATACpk_peak_167	26	.	2.7819	4.58445	2.62542	52
chr1	31150404	31151289	ATACpk_peak_169	109	.	4.90923	13.3106	10.9706	395
chr1	31150374	31151289	ATACpk_peak_169	109	.	4.90923	13.3106	10.9706	395
chr1	31150364	31151289	ATACpk_peak_169	109	.	4.90923	13.3106	10.9706	395
chr1	31222317	31223469	ATACpk_peak_170	578	.	12.6004	60.7976	57.8004	741
chr1	31221939	31223469	ATACpk_peak_170	578	.	12.6004	60.7976	57.8004	741
chr1	31221939	31223469	ATACpk_peak_170	578	.	12.6004	60.7976	57.8004	741
chr1	31227206	31227424	ATACpk_peak_171	48	.	3.43646	6.9363	4.82981	165
chr1	31959204	31963305	ATACpk_peak_172	87	.	4.41831	11.0403	8.76842	1556
chr1	31958508	31964925	ATACpk_peak_172	87	.	4.41831	11.0403	8.76842	1556
chr1	31958763	31964054	ATACpk_peak_172	87	.	4.41831	11.0403	8.76842	1556
chr1	31963786	31964925	ATACpk_peak_172	87	.	4.41831	11.0403	8.76842	1556
chr1	32073444	32074396	ATACpk_peak_173	94	.	4.58195	11.7822	9.48674	632
chr1	32073444	32074396	ATACpk_peak_173	94	.	4.58195	11.7822	9.48674	632
chr1	32073444	32074251	ATACpk_peak_173	94	.	4.58195	11.7822	9.48674	632
chr1	32172505	32173071	ATACpk_peak_174	325	.	8.83662	35.2817	32.5555	139
chr1	32172505	32173108	ATACpk_peak_174	325	.	8.83662	35.2817	32.5555	139
chr1	32172505	32173127	ATACpk_peak_174	325	.	8.83662	35.2817	32.5555	139
chr1	32465337	32465631	ATACpk_peak_175	60	.	3.76374	8.23385	6.06661	53
chr1	32465337	32465631	ATACpk_peak_175	60	.	3.76374	8.23385	6.06661	53
chr1	32465337	32465631	ATACpk_peak_175	60	.	3.76374	8.23385	6.06661	53
chr1	32636215	32636671	ATACpk_peak_176	87	.	4.41831	11.0403	8.76842	263
chr1	32636148	32636671	ATACpk_peak_176	87	.	4.41831	11.0403	8.76842	263
chr1	32636168	32636671	ATACpk_peak_176	87	.	4.41831	11.0403	8.76842	263
chr1	32834628	32835103	ATACpk_peak_177	48	.	3.43646	6.9363	4.82981	349
chr1	32834628	32835103	ATACpk_peak_177	48	.	3.43646	6.9363	4.82981	349
chr1	33244319	33245079	ATACpk_peak_179	87	.	4.41831	11.0403	8.76842	731
chr1	33244319	33245078	ATACpk_peak_179	87	.	4.41831	11.0403	8.76842	731
chr1	33244319	33245094	ATACpk_peak_179	87	.	4.41831	11.0403	8.76842	731
chr1	33407562	33408776	ATACpk_peak_180	166	.	6.05472	19.0814	16.6059	612
chr1	33407586	33408776	ATACpk_peak_180	166	.	6.05472	19.0814	16.6059	612
chr1	33407519	33408776	ATACpk_peak_180	166	.	6.05472	19.0814	16.6059	612
chr1	33567419	33570793	ATACpk_peak_181	398	.	9.9821	42.6693	39.854	1567
chr1	33567346	33570793	ATACpk_peak_181	398	.	9.9821	42.6693	39.854	1567
chr1	33567346	33570793	ATACpk_peak_181	398	.	9.9821	42.6693	39.854	1567
chr1	33600486	33601907	ATACpk_peak_182	219	.	7.03657	24.4818	21.9087	986
chr1	33600264	33601823	ATACpk_peak_182	219	.	7.03657	24.4818	21.9087	986
chr1	33600195	33601946	ATACpk_peak_182	219	.	7.03657	24.4818	21.9087	986
chr1	33616973	33617416	ATACpk_peak_183	102	.	4.74559	12.5391	10.2211	96
chr1	33616973	33617475	ATACpk_peak_183	102	.	4.74559	12.5391	10.2211	96
chr1	33616973	33617475	ATACpk_peak_183	102	.	4.74559	12.5391	10.2211	96
chr1	33631010	33631296	ATACpk_peak_184	60	.	3.76374	8.23385	6.06661	137
chr1	33631010	33631348	ATACpk_peak_184	60	.	3.76374	8.23385	6.06661	137
chr1	33637897	33638154	ATACpk_peak_185	73	.	4.09103	9.60366	7.38177	220
chr1	33637897	33638262	ATACpk_peak_185	73	.	4.09103	9.60366	7.38177	220
chr1	33637897	33638305	ATACpk_peak_185	73	.	4.09103	9.60366	7.38177	220
chr1	33669557	33670503	ATACpk_peak_186	441	.	10.6367	47.0485	44.1855	278
chr1	33669557	33670503	ATACpk_peak_186	441	.	10.6367	47.0485	44.1855	278
chr1	33669557	33670503	ATACpk_peak_186	441	.	10.6367	47.0485	44.1855	278
chr1	33680755	33681432	ATACpk_peak_187	31	.	2.94554	5.13962	3.13965	534
chr1	33680755	33681477	ATACpk_peak_187	31	.	2.94554	5.13962	3.13965	534
chr1	33680755	33681477	ATACpk_peak_187	31	.	2.94554	5.13962	3.13965	534
chr1	33719610	33721246	ATACpk_peak_188	951	.	17.5096	98.4777	95.1695	476
chr1	33719610	33721246	ATACpk_peak_188	951	.	17.5096	98.4777	95.1695	476
chr1	33719610	33721246	ATACpk_peak_188	951	.	17.5096	98.4777	95.1695	476
chr1	33757301	33758846	ATACpk_peak_189	486	.	11.2912	51.5335	48.6251	393
chr1	33757301	33758741	ATACpk_peak_189	486	.	11.2912	51.5335	48.6251	393
chr1	33757301	33758786	ATACpk_peak_189	486	.	11.2912	51.5335	48.6251	393
chr1	33813409	33815166	ATACpk_peak_190	649	.	13.5822	67.983	64.9207	1106
chr1	33813409	33815007	ATACpk_peak_190	649	.	13.5822	67.983	64.9207	1106
chr1	33813527	33815166	ATACpk_peak_190	649	.	13.5822	67.983	64.9207	1106
chr1	33829065	33829406	ATACpk_peak_191	26	.	2.7819	4.58445	2.62542	79
chr1	33829065	33829363	ATACpk_peak_191	26	.	2.7819	4.58445	2.62542	79
chr1	33829065	33829580	ATACpk_peak_191	26	.	2.7819	4.58445	2.62542	79
chr1	33838389	33839391	ATACpk_peak_192	125	.	5.23651	14.8952	12.5135	1260
chr1	33837846	33839391	ATACpk_peak_192	125	.	5.23651	14.8952	12.5135	1260
chr1	33837846	33839391	ATACpk_peak_192	125	.	5.23651	14.8952	12.5135	1260
chr1	33902787	33903789	ATACpk_peak_193	209	.	6.87292	23.5555	20.9978	902
chr1	33902787	33903789	ATACpk_peak_193	209	.	6.87292	23.5555	20.9978	902
chr1	33902787	33903789	ATACpk_peak_193	209	.	6.87292	23.5555	20.9978	902
chr1	33944806	33946066	ATACpk_peak_194	133	.	5.40015	15.7075	13.306	438
chr1	33944791	33945632	ATACpk_peak_194	133	.	5.40015	15.7075	13.306	438
chr1	33944791	33945831	ATACpk_peak_194	133	.	5.40015	15.7075	13.306	438
chr1	34214756	34215897	ATACpk_peak_195	102	.	4.74559	12.5391	10.2211	489
chr1	34214756	34215897	ATACpk_peak_195	102	.	4.74559	12.5391	10.2211	489
chr1	34214756	34215897	ATACpk_peak_195	102	.	4.74559	12.5391	10.2211	489
chr1	34230372	34230690	ATACpk_peak_196	42	.	3.27282	6.31656	4.24321	89
chr1	34230372	34230690	ATACpk_peak_196	42	.	3.27282	6.31656	4.24321	89
chr1	34236447	34236625	ATACpk_peak_197	26	.	2.7819	4.58445	2.62542	101
chr1	34236361	34236625	ATACpk_peak_197	26	.	2.7819	4.58445	2.62542	101
chr1	34236297	34236625	ATACpk_peak_197	26	.	2.7819	4.58445	2.62542	101
chr1	34312601	34313441	ATACpk_peak_198	67	.	3.92739	8.91008	6.7148	485
chr1	34312601	34313441	ATACpk_peak_198	67	.	3.92739	8.91008	6.7148	485
chr1	34312601	34313441	ATACpk_peak_198	67	.	3.92739	8.91008	6.7148	485
chr1	34334784	34335163	ATACpk_peak_199	73	.	4.09103	9.60366	7.38177	56
chr1	34334784	34335029	ATACpk_peak_199	73	.	4.09103	9.60366	7.38177	56
chr1	34334784	34335163	ATACpk_peak_199	73	.	4.09103	9.60366	7.38177	56
chr1	34438640	34440282	ATACpk_peak_200	1923	.	28.6372	196.27	192.32	1066
chr1	34438640	34440282	ATACpk_peak_200	1923	.	28.6372	196.27	192.32	1066
chr1	34438640	34440282	ATACpk_peak_200	1923	.	28.6372	196.27	192.32	1066
chr1	34459107	34459990	ATACpk_peak_201	174	.	6.21836	19.9544	17.4617	555
chr1	34459107	34460057	ATACpk_peak_201	174	.	6.21836	19.9544	17.4617	555
chr1	34459107	34460136	ATACpk_peak_201	174	.	6.21836	19.9544	17.4617	555
chr1	34485281	34485745	ATACpk_peak_202	67	.	3.92739	8.91008	6.7148	375
chr1	34485460	34485745	ATACpk_peak_202	67	.	3.92739	8.91008	6.7148	375
chr1	34485281	34485745	ATACpk_peak_202	67	.	3.92739	8.91008	6.7148	375
chr1	34498019	34499811	ATACpk_peak_203	335	.	9.00026	36.3143	33.5752	457
chr1	34497974	34499813	ATACpk_peak_203	335	.	9.00026	36.3143	33.5752	457
chr1	34497974	34499813	ATACpk_peak_203	335	.	9.00026	36.3143	33.5752	457
chr1	34501544	34501828	ATACpk_peak_204	31	.	2.94554	5.13962	3.13965	447
chr1	34501544	34501584	ATACpk_peak_204	31	.	2.94554	5.13962	3.13965	447
chr1	34501544	34502442	ATACpk_peak_204	31	.	2.94554	5.13962	3.13965	447
chr1	34503007	34503280	ATACpk_peak_205	36	.	3.10918	5.71735	3.67934	300
chr1	34503029	34503280	ATACpk_peak_205	36	.	3.10918	5.71735	3.67934	300
chr1	34502847	34503280	ATACpk_peak_205	36	.	3.10918	5.71735	3.67934	300
chr1	34510363	34511297	ATACpk_peak_206	183	.	6.382	20.8386	18.3291	289
chr1	34510363	34511299	ATACpk_peak_206	183	.	6.382	20.8386	18.3291	289
chr1	34510363	34511299	ATACpk_peak_206	183	.	6.382	20.8386	18.3291	289
chr1	34560214	34561279	ATACpk_peak_208	149	.	5.72744	17.3702	14.9306	589
chr1	34560214	34561502	ATACpk_peak_208	149	.	5.72744	17.3702	14.9306	589
chr1	34560214	34561352	ATACpk_peak_208	149	.	5.72744	17.3702	14.9306	589
chr1	34578396	34580108	ATACpk_peak_209	441	.	10.6367	47.0485	44.1855	1204
chr1	34578396	34580108	ATACpk_peak_209	441	.	10.6367	47.0485	44.1855	1204
chr1	34578396	34580108	ATACpk_peak_209	441	.	10.6367	47.0485	44.1855	1204
chr1	34750433	34750817	ATACpk_peak_210	48	.	3.43646	6.9363	4.82981	112
chr1	34750433	34750817	ATACpk_peak_210	48	.	3.43646	6.9363	4.82981	112
chr1	34750433	34750669	ATACpk_peak_210	48	.	3.43646	6.9363	4.82981	112
chr1	34801659	34802280	ATACpk_peak_211	200	.	6.70928	22.6394	20.0973	321
chr1	34801626	34802280	ATACpk_peak_211	200	.	6.70928	22.6394	20.0973	321
chr1	34801626	34802280	ATACpk_peak_211	200	.	6.70928	22.6394	20.0973	321
chr1	34842544	34843163	ATACpk_peak_212	192	.	6.54564	21.7337	19.2077	453
chr1	34842509	34843178	ATACpk_peak_212	192	.	6.54564	21.7337	19.2077	453
chr1	34842501	34843178	ATACpk_peak_212	192	.	6.54564	21.7337	19.2077	453
chr1	34849748	34850694	ATACpk_peak_213	305	.	8.50933	33.2403	30.5403	314
chr1	34849748	34850826	ATACpk_peak_213	305	.	8.50933	33.2403	30.5403	314
chr1	34849748	34851066	ATACpk_peak_213	305	.	8.50933	33.2403	30.5403	314
chr1	35214422	35215102	ATACpk_peak_214	125	.	5.23651	14.8952	12.5135	136
chr1	35214422	35215102	ATACpk_peak_214	125	.	5.23651	14.8952	12.5135	136
chr1	35214422	35215102	ATACpk_peak_214	125	.	5.23651	14.8952	12.5135	136
chr1	35427251	35427684	ATACpk_peak_216	54	.	3.6001	7.57567	5.43791	443
chr1	35427256	35427709	ATACpk_peak_216	54	.	3.6001	7.57567	5.43791	443
chr1	35426938	35427709	ATACpk_peak_216	54	.	3.6001	7.57567	5.43791	443
chr1	35866155	35866915	ATACpk_peak_217	67	.	3.92739	8.91008	6.7148	663
chr1	35866226	35866915	ATACpk_peak_217	67	.	3.92739	8.91008	6.7148	663
chr1	35866155	35866915	ATACpk_peak_217	67	.	3.92739	8.91008	6.7148	663
chr1	35869643	35870016	ATACpk_peak_218	60	.	3.76374	8.23385	6.06661	313
chr1	35869682	35870016	ATACpk_peak_218	60	.	3.76374	8.23385	6.06661	313
chr1	35869643	35870016	ATACpk_peak_218	60	.	3.76374	8.23385	6.06661	313
chr1	35985267	35985597	ATACpk_peak_219	141	.	5.5638	16.5326	14.1119	230
chr1	35985267	35985597	ATACpk_peak_219	141	.	5.5638	16.5326	14.1119	230
chr1	35985267	35985597	ATACpk_peak_219	141	.	5.5638	16.5326	14.1119	230
chr1	36010822	36011057	ATACpk_peak_220	31	.	2.94554	5.13962	3.13965	285
chr1	36010822	36011057	ATACpk_peak_220	31	.	2.94554	5.13962	3.13965	285
chr1	36010651	36011057	ATACpk_peak_220	31	.	2.94554	5.13962	3.13965	285
chr1	36064735	36065144	ATACpk_peak_221	48	.	3.43646	6.9363	4.82981	373
chr1	36064735	36065144	ATACpk_peak_221	48	.	3.43646	6.9363	4.82981	373
chr1	36064735	36065144	ATACpk_peak_221	48	.	3.43646	6.9363	4.82981	373
chr1	36067856	36068494	ATACpk_peak_222	554	.	12.2731	58.4465	55.4716	470
chr1	36067862	36068494	ATACpk_peak_222	554	.	12.2731	58.4465	55.4716	470
chr1	36067856	36068494	ATACpk_peak_222	554	.	12.2731	58.4465	55.4716	470
chr1	36068819	36069100	ATACpk_peak_223	21	.	2.61826	4.05299	2.13804	21
chr1	36068819	36069157	ATACpk_peak_223	21	.	2.61826	4.05299	2.13804	21
chr1	36243649	36244622	ATACpk_peak_224	578	.	12.6004	60.7976	57.8004	455
chr1	36243617	36244707	ATACpk_peak_224	578	.	12.6004	60.7976	57.8004	455
chr1	36243828	36244707	ATACpk_peak_224	578	.	12.6004	60.7976	57.8004	455
chr1	36265145	36265509	ATACpk_peak_225	26	.	2.7819	4.58445	2.62542	69
chr1	36265197	36265509	ATACpk_peak_225	26	.	2.7819	4.58445	2.62542	69
chr1	36265145	36265509	ATACpk_peak_225	26	.	2.7819	4.58445	2.62542	69
chr1	36269122	36269745	ATACpk_peak_226	219	.	7.03657	24.4818	21.9087	455
chr1	36269235	36269897	ATACpk_peak_226	219	.	7.03657	24.4818	21.9087	455
chr1	36269122	36269897	ATACpk_peak_226	219	.	7.03657	24.4818	21.9087	455
chr1	36287463	36287852	ATACpk_peak_227	31	.	2.94554	5.13962	3.13965	354
chr1	36287464	36287852	ATACpk_peak_227	31	.	2.94554	5.13962	3.13965	354
chr1	36287467	36287852	ATACpk_peak_227	31	.	2.94554	5.13962	3.13965	354
chr1	36303111	36303431	ATACpk_peak_228	26	.	2.7819	4.58445	2.62542	369
chr1	36307069	36308772	ATACpk_peak_229	566	.	12.4367	59.6192	56.6332	681
chr1	36307103	36308772	ATACpk_peak_229	566	.	12.4367	59.6192	56.6332	681
chr1	36307069	36308772	ATACpk_peak_229	566	.	12.4367	59.6192	56.6332	681
chr1	36314680	36315767	ATACpk_peak_230	325	.	8.83662	35.2817	32.5555	461
chr1	36314680	36315735	ATACpk_peak_230	325	.	8.83662	35.2817	32.5555	461
chr1	36314680	36315767	ATACpk_peak_230	325	.	8.83662	35.2817	32.5555	461
chr1	36333042	36334046	ATACpk_peak_231	31	.	2.94554	5.13962	3.13965	609
chr1	36334032	36334046	ATACpk_peak_231	31	.	2.94554	5.13962	3.13965	609
chr1	36333042	36334046	ATACpk_peak_231	31	.	2.94554	5.13962	3.13965	609
chr1	36336844	36336965	ATACpk_peak_232	26	.	2.7819	4.58445	2.62542	369
chr1	36336311	36336835	ATACpk_peak_232	26	.	2.7819	4.58445	2.62542	369
chr1	36336269	36336820	ATACpk_peak_232	26	.	2.7819	4.58445	2.62542	369
chr1	36368021	36369498	ATACpk_peak_233	463	.	10.964	49.2782	46.3924	1048
chr1	36368021	36369677	ATACpk_peak_233	463	.	10.964	49.2782	46.3924	1048
chr1	36368021	36369778	ATACpk_peak_233	463	.	10.964	49.2782	46.3924	1048
chr1	36372114	36372908	ATACpk_peak_234	54	.	3.6001	7.57567	5.43791	606
chr1	36372116	36372765	ATACpk_peak_234	54	.	3.6001	7.57567	5.43791	606
chr1	36444549	36445809	ATACpk_peak_235	1476	.	23.728	151.377	147.679	849
chr1	36444456	36445861	ATACpk_peak_235	1476	.	23.728	151.377	147.679	849
chr1	36444432	36445861	ATACpk_peak_235	1476	.	23.728	151.377	147.679	849
chr1	36471104	36472543	ATACpk_peak_236	822	.	15.8732	85.455	82.249	356
chr1	36471104	36472469	ATACpk_peak_236	822	.	15.8732	85.455	82.249	356
chr1	36471104	36472993	ATACpk_peak_236	822	.	15.8732	85.455	82.249	356
chr1	36474194	36474597	ATACpk_peak_237	36	.	3.10918	5.71735	3.67934	280
chr1	36475209	36475218	ATACpk_peak_238	26	.	2.7819	4.58445	2.62542	134
chr1	36510943	36512960	ATACpk_peak_239	1376	.	22.5825	141.27	137.64	928
chr1	36511173	36512960	ATACpk_peak_239	1376	.	22.5825	141.27	137.64	928
chr1	36511275	36512960	ATACpk_peak_239	1376	.	22.5825	141.27	137.64	928
chr1	36540140	36540356	ATACpk_peak_240	60	.	3.76374	8.23385	6.06661	161
chr1	36540140	36540638	ATACpk_peak_240	60	.	3.76374	8.23385	6.06661	161
chr1	36540140	36540301	ATACpk_peak_240	60	.	3.76374	8.23385	6.06661	161
chr1	36546091	36547896	ATACpk_peak_241	784	.	15.3823	81.633	78.4572	1153
chr1	36546091	36547847	ATACpk_peak_241	784	.	15.3823	81.633	78.4572	1153
chr1	36546091	36547896	ATACpk_peak_241	784	.	15.3823	81.633	78.4572	1153
chr1	36556760	36559320	ATACpk_peak_242	325	.	8.83662	35.2817	32.5555	1527
chr1	36556572	36559320	ATACpk_peak_242	325	.	8.83662	35.2817	32.5555	1527
chr1	36556572	36559320	ATACpk_peak_242	325	.	8.83662	35.2817	32.5555	1527
chr1	36559737	36560359	ATACpk_peak_243	48	.	3.43646	6.9363	4.82981	329
chr1	36559737	36560359	ATACpk_peak_243	48	.	3.43646	6.9363	4.82981	329
chr1	36560978	36561509	ATACpk_peak_244	36	.	3.10918	5.71735	3.67934	304
chr1	36560978	36562105	ATACpk_peak_244	36	.	3.10918	5.71735	3.67934	304
chr1	36560978	36562105	ATACpk_peak_244	36	.	3.10918	5.71735	3.67934	304
chr1	36562542	36563593	ATACpk_peak_245	36	.	3.10918	5.71735	3.67934	224
chr1	36563305	36563593	ATACpk_peak_245	36	.	3.10918	5.71735	3.67934	224
chr1	36566406	36566882	ATACpk_peak_246	26	.	2.7819	4.58445	2.62542	253
chr1	36566406	36566882	ATACpk_peak_246	26	.	2.7819	4.58445	2.62542	253
chr1	36569396	36570199	ATACpk_peak_247	67	.	3.92739	8.91008	6.7148	203
chr1	36569396	36570199	ATACpk_peak_247	67	.	3.92739	8.91008	6.7148	203
chr1	36569396	36570199	ATACpk_peak_247	67	.	3.92739	8.91008	6.7148	203
chr1	36571626	36572072	ATACpk_peak_248	26	.	2.7819	4.58445	2.62542	119
chr1	36571777	36572071	ATACpk_peak_248	26	.	2.7819	4.58445	2.62542	119
chr1	36571110	36571352	ATACpk_peak_248	26	.	2.7819	4.58445	2.62542	119
chr1	36577041	36577264	ATACpk_peak_249	31	.	2.94554	5.13962	3.13965	420
chr1	36576633	36577264	ATACpk_peak_249	31	.	2.94554	5.13962	3.13965	420
chr1	36580414	36580950	ATACpk_peak_251	31	.	2.94554	5.13962	3.13965	490
chr1	36580414	36580955	ATACpk_peak_251	31	.	2.94554	5.13962	3.13965	490
chr1	36583225	36584215	ATACpk_peak_252	42	.	3.27282	6.31656	4.24321	579
chr1	36583225	36583876	ATACpk_peak_252	42	.	3.27282	6.31656	4.24321	579
chr1	36586758	36592080	ATACpk_peak_253	141	.	5.5638	16.5326	14.1119	3954
chr1	36586758	36587470	ATACpk_peak_253	141	.	5.5638	16.5326	14.1119	3954
chr1	36587755	36592080	ATACpk_peak_253	141	.	5.5638	16.5326	14.1119	3954
chr1	36586758	36592080	ATACpk_peak_253	141	.	5.5638	16.5326	14.1119	3954
chr1	36592357	36594118	ATACpk_peak_254	60	.	3.76374	8.23385	6.06661	934
chr1	36592357	36593997	ATACpk_peak_254	60	.	3.76374	8.23385	6.06661	934
chr1	36592357	36594693	ATACpk_peak_254	60	.	3.76374	8.23385	6.06661	934
chr1	36595129	36596287	ATACpk_peak_255	54	.	3.6001	7.57567	5.43791	432
chr1	36595129	36595136	ATACpk_peak_255	54	.	3.6001	7.57567	5.43791	432
chr1	36595428	36596287	ATACpk_peak_255	54	.	3.6001	7.57567	5.43791	432
chr1	36595129	36596287	ATACpk_peak_255	54	.	3.6001	7.57567	5.43791	432
chr1	36610490	36611048	ATACpk_peak_258	219	.	7.03657	24.4818	21.9087	781
chr1	36609880	36611754	ATACpk_peak_258	219	.	7.03657	24.4818	21.9087	781
chr1	36610341	36611127	ATACpk_peak_258	219	.	7.03657	24.4818	21.9087	781
chr1	36612616	36613001	ATACpk_peak_259	26	.	2.7819	4.58445	2.62542	108
chr1	36612565	36613001	ATACpk_peak_259	26	.	2.7819	4.58445	2.62542	108
chr1	36612565	36613001	ATACpk_peak_259	26	.	2.7819	4.58445	2.62542	108
chr1	36613779	36614333	ATACpk_peak_260	48	.	3.43646	6.9363	4.82981	785
chr1	36613668	36614033	ATACpk_peak_260	48	.	3.43646	6.9363	4.82981	785
chr1	36613383	36614508	ATACpk_peak_260	48	.	3.43646	6.9363	4.82981	785
chr1	36619320	36620292	ATACpk_peak_261	247	.	7.52749	27.3193	24.7022	333
chr1	36619320	36620292	ATACpk_peak_261	247	.	7.52749	27.3193	24.7022	333
chr1	36619320	36620292	ATACpk_peak_261	247	.	7.52749	27.3193	24.7022	333
chr1	36634199	36634497	ATACpk_peak_262	36	.	3.10918	5.71735	3.67934	264
chr1	36634231	36634985	ATACpk_peak_262	36	.	3.10918	5.71735	3.67934	264
chr1	36634199	36635221	ATACpk_peak_262	36	.	3.10918	5.71735	3.67934	264
chr1	36679570	36679926	ATACpk_peak_263	26	.	2.7819	4.58445	2.62542	494
chr1	36679630	36680057	ATACpk_peak_263	26	.	2.7819	4.58445	2.62542	494
chr1	36681008	36681364	ATACpk_peak_264	237	.	7.36385	26.3639	23.7612	2578
chr1	36680531	36681456	ATACpk_peak_264	237	.	7.36385	26.3639	23.7612	2578
chr1	36680533	36681619	ATACpk_peak_264	237	.	7.36385	26.3639	23.7612	2578
chr1	36681959	36683840	ATACpk_peak_264	237	.	7.36385	26.3639	23.7612	2578
chr1	36681986	36683840	ATACpk_peak_264	237	.	7.36385	26.3639	23.7612	2578
chr1	36681993	36683840	ATACpk_peak_264	237	.	7.36385	26.3639	23.7612	2578
chr1	36690894	36692298	ATACpk_peak_265	1291	.	21.6006	132.729	129.161	615
chr1	36690894	36692263	ATACpk_peak_265	1291	.	21.6006	132.729	129.161	615
chr1	36690894	36692383	ATACpk_peak_265	1291	.	21.6006	132.729	129.161	615
chr1	36709234	36710209	ATACpk_peak_266	978	.	17.8369	101.132	97.8028	814
chr1	36709501	36710209	ATACpk_peak_266	978	.	17.8369	101.132	97.8028	814
chr1	36709234	36710209	ATACpk_peak_266	978	.	17.8369	101.132	97.8028	814
chr1	36746585	36746689	ATACpk_peak_267	73	.	4.09103	9.60366	7.38177	41
chr1	36746585	36746926	ATACpk_peak_267	73	.	4.09103	9.60366	7.38177	41
chr1	36784757	36785052	ATACpk_peak_268	36	.	3.10918	5.71735	3.67934	236
chr1	36784606	36785052	ATACpk_peak_268	36	.	3.10918	5.71735	3.67934	236
chr1	36785384	36785424	ATACpk_peak_269	26	.	2.7819	4.58445	2.62542	147
chr1	36785384	36785709	ATACpk_peak_269	26	.	2.7819	4.58445	2.62542	147
chr1	36785384	36785709	ATACpk_peak_269	26	.	2.7819	4.58445	2.62542	147
chr1	36938924	36940302	ATACpk_peak_270	1319	.	21.9279	135.563	131.974	792
chr1	36938977	36940302	ATACpk_peak_270	1319	.	21.9279	135.563	131.974	792
chr1	36938858	36940302	ATACpk_peak_270	1319	.	21.9279	135.563	131.974	792
chr1	37028608	37030115	ATACpk_peak_271	886	.	16.6914	91.9134	88.6565	683
chr1	37028608	37030115	ATACpk_peak_271	886	.	16.6914	91.9134	88.6565	683
chr1	37028608	37030115	ATACpk_peak_271	886	.	16.6914	91.9134	88.6565	683
chr1	37075352	37076168	ATACpk_peak_272	117	.	5.07287	14.0961	11.7349	626
chr1	37075352	37076168	ATACpk_peak_272	117	.	5.07287	14.0961	11.7349	626
chr1	37075352	37076168	ATACpk_peak_272	117	.	5.07287	14.0961	11.7349	626
chr1	37218445	37218686	ATACpk_peak_273	67	.	3.92739	8.91008	6.7148	228
chr1	37261086	37261486	ATACpk_peak_274	87	.	4.41831	11.0403	8.76842	421
chr1	37261056	37261796	ATACpk_peak_274	87	.	4.41831	11.0403	8.76842	421
chr1	37288253	37288849	ATACpk_peak_275	73	.	4.09103	9.60366	7.38177	80
chr1	37288253	37288695	ATACpk_peak_275	73	.	4.09103	9.60366	7.38177	80
chr1	37288253	37288849	ATACpk_peak_275	73	.	4.09103	9.60366	7.38177	80
chr1	37299534	37301349	ATACpk_peak_276	1004	.	18.1642	103.802	100.452	374
chr1	37299534	37301349	ATACpk_peak_276	1004	.	18.1642	103.802	100.452	374
chr1	37299534	37301349	ATACpk_peak_276	1004	.	18.1642	103.802	100.452	374
chr1	37429147	37430657	ATACpk_peak_277	1194	.	20.4551	122.914	119.419	916
chr1	37429351	37430657	ATACpk_peak_277	1194	.	20.4551	122.914	119.419	916
chr1	37429147	37430657	ATACpk_peak_277	1194	.	20.4551	122.914	119.419	916
chr1	37540614	37541087	ATACpk_peak_278	67	.	3.92739	8.91008	6.7148	615
chr1	37540625	37541153	ATACpk_peak_278	67	.	3.92739	8.91008	6.7148	615
chr1	37540639	37541323	ATACpk_peak_278	67	.	3.92739	8.91008	6.7148	615
chr1	37579460	37579846	ATACpk_peak_279	31	.	2.94554	5.13962	3.13965	378
chr1	37579460	37579846	ATACpk_peak_279	31	.	2.94554	5.13962	3.13965	378
chr1	37604960	37605512	ATACpk_peak_280	31	.	2.94554	5.13962	3.13965	328
chr1	37719565	37720083	ATACpk_peak_281	133	.	5.40015	15.7075	13.306	323
chr1	37719548	37720083	ATACpk_peak_281	133	.	5.40015	15.7075	13.306	323
chr1	37719548	37720083	ATACpk_peak_281	133	.	5.40015	15.7075	13.306	323
chr1	37864514	37865904	ATACpk_peak_282	2249	.	32.0736	229.048	224.951	685
chr1	37864514	37866036	ATACpk_peak_282	2249	.	32.0736	229.048	224.951	685
chr1	37864514	37866161	ATACpk_peak_282	2249	.	32.0736	229.048	224.951	685
chr1	37871707	37872924	ATACpk_peak_283	441	.	10.6367	47.0485	44.1855	619
chr1	37871619	37872939	ATACpk_peak_283	441	.	10.6367	47.0485	44.1855	619
chr1	37871619	37872939	ATACpk_peak_283	441	.	10.6367	47.0485	44.1855	619
chr1	37890125	37890782	ATACpk_peak_284	387	.	9.81846	41.5919	38.7886	282
chr1	37890125	37890782	ATACpk_peak_284	387	.	9.81846	41.5919	38.7886	282
chr1	37890125	37890782	ATACpk_peak_284	387	.	9.81846	41.5919	38.7886	282
chr1	37996516	37998939	ATACpk_peak_285	2392	.	33.5464	243.4	239.251	871
chr1	37996516	37999138	ATACpk_peak_285	2392	.	33.5464	243.4	239.251	871
chr1	37996516	37999138	ATACpk_peak_285	2392	.	33.5464	243.4	239.251	871
chr1	38128610	38130202	ATACpk_peak_286	409	.	10.1457	43.7538	40.9264	1262
chr1	38128796	38130491	ATACpk_peak_286	409	.	10.1457	43.7538	40.9264	1262
chr1	38128536	38130491	ATACpk_peak_286	409	.	10.1457	43.7538	40.9264	1262
chr1	38132553	38133431	ATACpk_peak_287	192	.	6.54564	21.7337	19.2077	539
chr1	38132553	38133611	ATACpk_peak_287	192	.	6.54564	21.7337	19.2077	539
chr1	38132553	38133527	ATACpk_peak_287	192	.	6.54564	21.7337	19.2077	539
chr1	38233164	38234623	ATACpk_peak_289	497	.	11.4549	52.6706	49.7511	945
chr1	38233209	38234486	ATACpk_peak_289	497	.	11.4549	52.6706	49.7511	945
chr1	38233135	38234623	ATACpk_peak_289	497	.	11.4549	52.6706	49.7511	945
chr1	38258660	38258917	ATACpk_peak_290	54	.	3.6001	7.57567	5.43791	766
chr1	38378496	38379046	ATACpk_peak_291	36	.	3.10918	5.71735	3.67934	403
chr1	38378496	38379006	ATACpk_peak_291	36	.	3.10918	5.71735	3.67934	403
chr1	38378496	38379133	ATACpk_peak_291	36	.	3.10918	5.71735	3.67934	403
chr1	38429578	38431210	ATACpk_peak_292	1390	.	22.7461	142.705	139.064	959
chr1	38429617	38430759	ATACpk_peak_292	1390	.	22.7461	142.705	139.064	959
chr1	38429578	38431087	ATACpk_peak_292	1390	.	22.7461	142.705	139.064	959
chr1	38767130	38767510	ATACpk_peak_294	48	.	3.43646	6.9363	4.82981	54
chr1	38767130	38767510	ATACpk_peak_294	48	.	3.43646	6.9363	4.82981	54
chr1	38767130	38767510	ATACpk_peak_294	48	.	3.43646	6.9363	4.82981	54
chr1	38809261	38810021	ATACpk_peak_295	87	.	4.41831	11.0403	8.76842	174
chr1	38809261	38810021	ATACpk_peak_295	87	.	4.41831	11.0403	8.76842	174
chr1	38809261	38810021	ATACpk_peak_295	87	.	4.41831	11.0403	8.76842	174
chr1	38835769	38836802	ATACpk_peak_296	295	.	8.34569	32.2319	29.5452	502
chr1	38835670	38836802	ATACpk_peak_296	295	.	8.34569	32.2319	29.5452	502
chr1	38835658	38836802	ATACpk_peak_296	295	.	8.34569	32.2319	29.5452	502
chr1	38897873	38898191	ATACpk_peak_297	31	.	2.94554	5.13962	3.13965	253
chr1	38897873	38898133	ATACpk_peak_297	31	.	2.94554	5.13962	3.13965	253
chr1	38987119	38988417	ATACpk_peak_298	1999	.	29.4554	203.98	199.992	691
chr1	38987119	38988586	ATACpk_peak_298	1999	.	29.4554	203.98	199.992	691
chr1	38987119	38988664	ATACpk_peak_298	1999	.	29.4554	203.98	199.992	691
chr1	39045298	39047020	ATACpk_peak_299	157	.	5.89108	18.2199	15.7621	551
chr1	39045298	39046874	ATACpk_peak_299	157	.	5.89108	18.2199	15.7621	551
chr1	39045424	39047051	ATACpk_peak_299	157	.	5.89108	18.2199	15.7621	551
chr1	39192752	39194682	ATACpk_peak_300	247	.	7.52749	27.3193	24.7022	1387
chr1	39192975	39194734	ATACpk_peak_300	247	.	7.52749	27.3193	24.7022	1387
chr1	39193028	39194682	ATACpk_peak_300	247	.	7.52749	27.3193	24.7022	1387
chr1	39362214	39362829	ATACpk_peak_301	36	.	3.10918	5.71735	3.67934	453
chr1	39362508	39362829	ATACpk_peak_301	36	.	3.10918	5.71735	3.67934	453
chr1	39362214	39362829	ATACpk_peak_301	36	.	3.10918	5.71735	3.67934	453
chr1	39367440	39368655	ATACpk_peak_302	295	.	8.34569	32.2319	29.5452	432
chr1	39367440	39368485	ATACpk_peak_302	295	.	8.34569	32.2319	29.5452	432
chr1	39367440	39368840	ATACpk_peak_302	295	.	8.34569	32.2319	29.5452	432
chr1	39415214	39415534	ATACpk_peak_303	60	.	3.76374	8.23385	6.06661	232
chr1	39415214	39415567	ATACpk_peak_303	60	.	3.76374	8.23385	6.06661	232
chr1	39415214	39415565	ATACpk_peak_303	60	.	3.76374	8.23385	6.06661	232
chr1	39478479	39478829	ATACpk_peak_304	80	.	4.25467	10.3139	8.06645	135
chr1	39478479	39478829	ATACpk_peak_304	80	.	4.25467	10.3139	8.06645	135
chr1	39478479	39478829	ATACpk_peak_304	80	.	4.25467	10.3139	8.06645	135
chr1	39534979	39536423	ATACpk_peak_305	1084	.	19.146	111.905	108.494	942
chr1	39534893	39536423	ATACpk_peak_305	1084	.	19.146	111.905	108.494	942
chr1	39534904	39536423	ATACpk_peak_305	1084	.	19.146	111.905	108.494	942
chr1	39576552	39577551	ATACpk_peak_306	860	.	16.3641	89.3171	86.0807	795
chr1	39576552	39577748	ATACpk_peak_306	860	.	16.3641	89.3171	86.0807	795
chr1	39576552	39577858	ATACpk_peak_306	860	.	16.3641	89.3171	86.0807	795
chr1	39720747	39721605	ATACpk_peak_309	157	.	5.89108	18.2199	15.7621	298
chr1	39720676	39721761	ATACpk_peak_309	157	.	5.89108	18.2199	15.7621	298
chr1	39720676	39721778	ATACpk_peak_309	157	.	5.89108	18.2199	15.7621	298
chr1	39755805	39756653	ATACpk_peak_310	94	.	4.58195	11.7822	9.48674	217
chr1	39755755	39756653	ATACpk_peak_310	94	.	4.58195	11.7822	9.48674	217
chr1	39755770	39756653	ATACpk_peak_310	94	.	4.58195	11.7822	9.48674	217
chr1	39810428	39810899	ATACpk_peak_311	237	.	7.36385	26.3639	23.7612	291
chr1	39810428	39810899	ATACpk_peak_311	237	.	7.36385	26.3639	23.7612	291
chr1	39810428	39810899	ATACpk_peak_311	237	.	7.36385	26.3639	23.7612	291
chr1	39892850	39893424	ATACpk_peak_312	125	.	5.23651	14.8952	12.5135	485
chr1	39892850	39893378	ATACpk_peak_312	125	.	5.23651	14.8952	12.5135	485
chr1	39892850	39893424	ATACpk_peak_312	125	.	5.23651	14.8952	12.5135	485
chr1	39900214	39901289	ATACpk_peak_313	125	.	5.23651	14.8952	12.5135	771
chr1	39900362	39901289	ATACpk_peak_313	125	.	5.23651	14.8952	12.5135	771
chr1	39900061	39901289	ATACpk_peak_313	125	.	5.23651	14.8952	12.5135	771
chr1	39936165	39936554	ATACpk_peak_314	73	.	4.09103	9.60366	7.38177	340
chr1	39935920	39936709	ATACpk_peak_314	73	.	4.09103	9.60366	7.38177	340
chr1	39935920	39936709	ATACpk_peak_314	73	.	4.09103	9.60366	7.38177	340
chr1	40211408	40212312	ATACpk_peak_315	209	.	6.87292	23.5555	20.9978	342
chr1	40211408	40212312	ATACpk_peak_315	209	.	6.87292	23.5555	20.9978	342
chr1	40211408	40212312	ATACpk_peak_315	209	.	6.87292	23.5555	20.9978	342
chr1	40266648	40266946	ATACpk_peak_316	21	.	2.61826	4.05299	2.13804	129
chr1	40266648	40266814	ATACpk_peak_316	21	.	2.61826	4.05299	2.13804	129
chr1	40767309	40768158	ATACpk_peak_318	67	.	3.92739	8.91008	6.7148	657
chr1	40767531	40768158	ATACpk_peak_318	67	.	3.92739	8.91008	6.7148	657
chr1	40767309	40768158	ATACpk_peak_318	67	.	3.92739	8.91008	6.7148	657
chr1	40790200	40791152	ATACpk_peak_319	520	.	11.7822	54.9631	52.0211	490
chr1	40790200	40791269	ATACpk_peak_319	520	.	11.7822	54.9631	52.0211	490
chr1	40790200	40791302	ATACpk_peak_319	520	.	11.7822	54.9631	52.0211	490
chr1	41055708	41056329	ATACpk_peak_320	67	.	3.92739	8.91008	6.7148	514
chr1	41055708	41056329	ATACpk_peak_320	67	.	3.92739	8.91008	6.7148	514
chr1	41055708	41056329	ATACpk_peak_320	67	.	3.92739	8.91008	6.7148	514
chr1	41900622	41900988	ATACpk_peak_321	60	.	3.76374	8.23385	6.06661	279
chr1	42684524	42684921	ATACpk_peak_322	73	.	4.09103	9.60366	7.38177	188
chr1	42684464	42684921	ATACpk_peak_322	73	.	4.09103	9.60366	7.38177	188
chr1	42684283	42684882	ATACpk_peak_322	73	.	4.09103	9.60366	7.38177	188
chr1	42697835	42698469	ATACpk_peak_323	67	.	3.92739	8.91008	6.7148	121
chr1	42697835	42698469	ATACpk_peak_323	67	.	3.92739	8.91008	6.7148	121
chr1	42697840	42698469	ATACpk_peak_323	67	.	3.92739	8.91008	6.7148	121
chr1	42850880	42851712	ATACpk_peak_324	951	.	17.5096	98.4777	95.1695	373
chr1	42850880	42851712	ATACpk_peak_324	951	.	17.5096	98.4777	95.1695	373
chr1	42850880	42851712	ATACpk_peak_324	951	.	17.5096	98.4777	95.1695	373
chr1	42883464	42883777	ATACpk_peak_325	420	.	10.3094	44.8453	42.0059	150
chr1	42883464	42883800	ATACpk_peak_325	420	.	10.3094	44.8453	42.0059	150
chr1	42883464	42883805	ATACpk_peak_325	420	.	10.3094	44.8453	42.0059	150
chr1	42922935	42923244	ATACpk_peak_326	26	.	2.7819	4.58445	2.62542	288
chr1	42922935	42923244	ATACpk_peak_326	26	.	2.7819	4.58445	2.62542	288
chr1	42922935	42923244	ATACpk_peak_326	26	.	2.7819	4.58445	2.62542	288
chr1	42952839	42953495	ATACpk_peak_327	109	.	4.90923	13.3106	10.9706	682
chr1	42952991	42953453	ATACpk_peak_327	109	.	4.90923	13.3106	10.9706	682
chr1	42952800	42953618	ATACpk_peak_327	109	.	4.90923	13.3106	10.9706	682
chr1	43098262	43098958	ATACpk_peak_328	463	.	10.964	49.2782	46.3924	412
chr1	43098251	43098958	ATACpk_peak_328	463	.	10.964	49.2782	46.3924	412
chr1	43098232	43098958	ATACpk_peak_328	463	.	10.964	49.2782	46.3924	412
chr1	43267222	43267735	ATACpk_peak_329	109	.	4.90923	13.3106	10.9706	251
chr1	43267026	43267735	ATACpk_peak_329	109	.	4.90923	13.3106	10.9706	251
chr1	43267026	43267735	ATACpk_peak_329	109	.	4.90923	13.3106	10.9706	251
chr1	43445588	43446131	ATACpk_peak_330	16	.	2.45462	3.54652	1.68009	174
chr1	43445528	43446131	ATACpk_peak_330	16	.	2.45462	3.54652	1.68009	174
chr1	43445653	43446131	ATACpk_peak_330	16	.	2.45462	3.54652	1.68009	174
chr1	43546505	43547968	ATACpk_peak_331	42	.	3.27282	6.31656	4.24321	1254
chr1	43546676	43547968	ATACpk_peak_331	42	.	3.27282	6.31656	4.24321	1254
chr1	43546505	43547968	ATACpk_peak_331	42	.	3.27282	6.31656	4.24321	1254
chr1	43553920	43554430	ATACpk_peak_332	42	.	3.27282	6.31656	4.24321	18
chr1	43827010	43828415	ATACpk_peak_334	1071	.	18.9824	110.545	107.144	869
chr1	43827010	43828220	ATACpk_peak_334	1071	.	18.9824	110.545	107.144	869
chr1	43827010	43828440	ATACpk_peak_334	1071	.	18.9824	110.545	107.144	869
chr1	43933398	43934625	ATACpk_peak_335	1741	.	26.6735	178.022	174.168	544
chr1	43933398	43934625	ATACpk_peak_335	1741	.	26.6735	178.022	174.168	544
chr1	43933398	43934625	ATACpk_peak_335	1741	.	26.6735	178.022	174.168	544
chr1	44011956	44012207	ATACpk_peak_336	48	.	3.43646	6.9363	4.82981	324
chr1	44011618	44012207	ATACpk_peak_336	48	.	3.43646	6.9363	4.82981	324
chr1	44011603	44012207	ATACpk_peak_336	48	.	3.43646	6.9363	4.82981	324
chr1	44012566	44013649	ATACpk_peak_337	31	.	2.94554	5.13962	3.13965	844
chr1	44012566	44012902	ATACpk_peak_337	31	.	2.94554	5.13962	3.13965	844
chr1	44012566	44012970	ATACpk_peak_337	31	.	2.94554	5.13962	3.13965	844
chr1	44013281	44013646	ATACpk_peak_337	31	.	2.94554	5.13962	3.13965	844
chr1	44080947	44082762	ATACpk_peak_338	125	.	5.23651	14.8952	12.5135	741
chr1	44080947	44082762	ATACpk_peak_338	125	.	5.23651	14.8952	12.5135	741
chr1	44080947	44082762	ATACpk_peak_338	125	.	5.23651	14.8952	12.5135	741
chr1	44083413	44084574	ATACpk_peak_339	31	.	2.94554	5.13962	3.13965	61
chr1	44083378	44084574	ATACpk_peak_339	31	.	2.94554	5.13962	3.13965	61
chr1	44083378	44084574	ATACpk_peak_339	31	.	2.94554	5.13962	3.13965	61
chr1	44098212	44098724	ATACpk_peak_340	31	.	2.94554	5.13962	3.13965	494
chr1	44098483	44098724	ATACpk_peak_340	31	.	2.94554	5.13962	3.13965	494
chr1	44101635	44103094	ATACpk_peak_341	978	.	17.8369	101.132	97.8028	786
chr1	44101635	44103153	ATACpk_peak_341	978	.	17.8369	101.132	97.8028	786
chr1	44101635	44103153	ATACpk_peak_341	978	.	17.8369	101.132	97.8028	786
chr1	44118856	44119938	ATACpk_peak_342	80	.	4.25467	10.3139	8.06645	569
chr1	44118856	44119729	ATACpk_peak_342	80	.	4.25467	10.3139	8.06645	569
chr1	44118856	44119665	ATACpk_peak_342	80	.	4.25467	10.3139	8.06645	569
chr1	44147219	44148403	ATACpk_peak_343	335	.	9.00026	36.3143	33.5752	732
chr1	44147219	44148403	ATACpk_peak_343	335	.	9.00026	36.3143	33.5752	732
chr1	44147219	44148403	ATACpk_peak_343	335	.	9.00026	36.3143	33.5752	732
chr1	44367250	44367592	ATACpk_peak_344	109	.	4.90923	13.3106	10.9706	99
chr1	44367250	44367663	ATACpk_peak_344	109	.	4.90923	13.3106	10.9706	99
chr1	44480727	44481474	ATACpk_peak_345	54	.	3.6001	7.57567	5.43791	359
chr1	44480727	44481474	ATACpk_peak_345	54	.	3.6001	7.57567	5.43791	359
chr1	44480727	44481474	ATACpk_peak_345	54	.	3.6001	7.57567	5.43791	359
chr1	44959988	44960056	ATACpk_peak_346	31	.	2.94554	5.13962	3.13965	234
chr1	44959988	44960373	ATACpk_peak_346	31	.	2.94554	5.13962	3.13965	234
chr1	44959988	44960373	ATACpk_peak_346	31	.	2.94554	5.13962	3.13965	234
chr1	45205266	45205639	ATACpk_peak_347	36	.	3.10918	5.71735	3.67934	253
chr1	45205266	45205639	ATACpk_peak_347	36	.	3.10918	5.71735	3.67934	253
chr1	45205266	45205639	ATACpk_peak_347	36	.	3.10918	5.71735	3.67934	253
chr1	45794542	45795919	ATACpk_peak_349	925	.	17.1823	95.8396	92.5523	913
chr1	45794536	45795919	ATACpk_peak_349	925	.	17.1823	95.8396	92.5523	913
chr1	45794536	45795919	ATACpk_peak_349	925	.	17.1823	95.8396	92.5523	913
chr1	45925602	45925891	ATACpk_peak_350	42	.	3.27282	6.31656	4.24321	420
chr1	45925432	45925891	ATACpk_peak_350	42	.	3.27282	6.31656	4.24321	420
chr1	45925192	45925891	ATACpk_peak_350	42	.	3.27282	6.31656	4.24321	420
chr1	46066092	46067374	ATACpk_peak_351	237	.	7.36385	26.3639	23.7612	893
chr1	46066174	46067374	ATACpk_peak_351	237	.	7.36385	26.3639	23.7612	893
chr1	46066012	46067374	ATACpk_peak_351	237	.	7.36385	26.3639	23.7612	893
chr1	46087780	46088124	ATACpk_peak_352	36	.	3.10918	5.71735	3.67934	128
chr1	46087780	46088124	ATACpk_peak_352	36	.	3.10918	5.71735	3.67934	128
chr1	46088684	46088934	ATACpk_peak_353	42	.	3.27282	6.31656	4.24321	301
chr1	46088546	46088934	ATACpk_peak_353	42	.	3.27282	6.31656	4.24321	301
chr1	46088546	46088934	ATACpk_peak_353	42	.	3.27282	6.31656	4.24321	301
chr1	46197593	46198148	ATACpk_peak_354	26	.	2.7819	4.58445	2.62542	378
chr1	46425205	46426254	ATACpk_peak_356	209	.	6.87292	23.5555	20.9978	412
chr1	46425006	46425925	ATACpk_peak_356	209	.	6.87292	23.5555	20.9978	412
chr1	46425006	46426254	ATACpk_peak_356	209	.	6.87292	23.5555	20.9978	412
chr1	46449143	46449907	ATACpk_peak_357	94	.	4.58195	11.7822	9.48674	353
chr1	46449143	46449907	ATACpk_peak_357	94	.	4.58195	11.7822	9.48674	353
chr1	46449228	46449907	ATACpk_peak_357	94	.	4.58195	11.7822	9.48674	353
chr1	46520942	46523233	ATACpk_peak_358	315	.	8.67298	34.257	31.5438	1614
chr1	46520468	46523173	ATACpk_peak_358	315	.	8.67298	34.257	31.5438	1614
chr1	46520468	46523233	ATACpk_peak_358	315	.	8.67298	34.257	31.5438	1614
chr1	46608216	46608753	ATACpk_peak_359	21	.	2.61826	4.05299	2.13804	333
chr1	46630907	46631143	ATACpk_peak_360	31	.	2.94554	5.13962	3.13965	365
chr1	46630859	46631143	ATACpk_peak_360	31	.	2.94554	5.13962	3.13965	365
chr1	46637119	46637492	ATACpk_peak_361	26	.	2.7819	4.58445	2.62542	207
chr1	46637119	46637484	ATACpk_peak_361	26	.	2.7819	4.58445	2.62542	207
chr1	46805561	46806016	ATACpk_peak_367	67	.	3.92739	8.91008	6.7148	267
chr1	46805412	46806016	ATACpk_peak_367	67	.	3.92739	8.91008	6.7148	267
chr1	46805147	46806016	ATACpk_peak_367	67	.	3.92739	8.91008	6.7148	267
chr1	46808105	46808704	ATACpk_peak_368	26	.	2.7819	4.58445	2.62542	615
chr1	46852184	46854690	ATACpk_peak_369	2716	.	36.8192	275.897	271.664	1331
chr1	46852184	46854603	ATACpk_peak_369	2716	.	36.8192	275.897	271.664	1331
chr1	46852184	46854855	ATACpk_peak_369	2716	.	36.8192	275.897	271.664	1331
chr1	46997651	46997944	ATACpk_peak_370	31	.	2.94554	5.13962	3.13965	192
chr1	46997651	46997944	ATACpk_peak_370	31	.	2.94554	5.13962	3.13965	192
chr1	47047918	47048342	ATACpk_peak_371	26	.	2.7819	4.58445	2.62542	358
chr1	47047861	47048342	ATACpk_peak_371	26	.	2.7819	4.58445	2.62542	358
chr1	47047861	47048342	ATACpk_peak_371	26	.	2.7819	4.58445	2.62542	358
chr1	47629067	47630206	ATACpk_peak_372	94	.	4.58195	11.7822	9.48674	650
chr1	47629073	47630328	ATACpk_peak_372	94	.	4.58195	11.7822	9.48674	650
chr1	47629199	47630288	ATACpk_peak_372	94	.	4.58195	11.7822	9.48674	650
chr1	48052734	48053012	ATACpk_peak_373	31	.	2.94554	5.13962	3.13965	159
chr1	48052832	48053208	ATACpk_peak_373	31	.	2.94554	5.13962	3.13965	159
chr1	48546012	48547111	ATACpk_peak_374	209	.	6.87292	23.5555	20.9978	587
chr1	48545856	48547297	ATACpk_peak_374	209	.	6.87292	23.5555	20.9978	587
chr1	48546164	48547189	ATACpk_peak_374	209	.	6.87292	23.5555	20.9978	587
chr1	50102891	50103882	ATACpk_peak_375	109	.	4.90923	13.3106	10.9706	684
chr1	50103030	50103882	ATACpk_peak_375	109	.	4.90923	13.3106	10.9706	684
chr1	50102891	50103882	ATACpk_peak_375	109	.	4.90923	13.3106	10.9706	684
chr1	50107023	50108334	ATACpk_peak_376	578	.	12.6004	60.7976	57.8004	474
chr1	50107023	50108334	ATACpk_peak_376	578	.	12.6004	60.7976	57.8004	474
chr1	50107023	50108334	ATACpk_peak_376	578	.	12.6004	60.7976	57.8004	474
chr1	50926400	50927948	ATACpk_peak_377	420	.	10.3094	44.8453	42.0059	1094
chr1	50926709	50927948	ATACpk_peak_377	420	.	10.3094	44.8453	42.0059	1094
chr1	50926424	50927948	ATACpk_peak_377	420	.	10.3094	44.8453	42.0059	1094
chr1	51426600	51426796	ATACpk_peak_379	26	.	2.7819	4.58445	2.62542	164
chr1	51426600	51426784	ATACpk_peak_379	26	.	2.7819	4.58445	2.62542	164
chr1	51458596	51459348	ATACpk_peak_380	48	.	3.43646	6.9363	4.82981	834
chr1	51458356	51459348	ATACpk_peak_380	48	.	3.43646	6.9363	4.82981	834
chr1	51458710	51459348	ATACpk_peak_380	48	.	3.43646	6.9363	4.82981	834
chr1	51477472	51478906	ATACpk_peak_381	1166	.	20.1278	120.14	116.666	954
chr1	51477504	51478906	ATACpk_peak_381	1166	.	20.1278	120.14	116.666	954
chr1	51477472	51478906	ATACpk_peak_381	1166	.	20.1278	120.14	116.666	954
chr1	51481733	51482482	ATACpk_peak_382	149	.	5.72744	17.3702	14.9306	135
chr1	51481733	51482482	ATACpk_peak_382	149	.	5.72744	17.3702	14.9306	135
chr1	51481733	51482441	ATACpk_peak_382	149	.	5.72744	17.3702	14.9306	135
chr1	51915244	51916078	ATACpk_peak_384	125	.	5.23651	14.8952	12.5135	476
chr1	51915329	51916234	ATACpk_peak_384	125	.	5.23651	14.8952	12.5135	476
chr1	51915261	51916235	ATACpk_peak_384	125	.	5.23651	14.8952	12.5135	476
chr1	52113677	52114006	ATACpk_peak_385	117	.	5.07287	14.0961	11.7349	263
chr1	52113524	52114006	ATACpk_peak_385	117	.	5.07287	14.0961	11.7349	263
chr1	52113473	52114006	ATACpk_peak_385	117	.	5.07287	14.0961	11.7349	263
chr1	52119033	52120048	ATACpk_peak_386	315	.	8.67298	34.257	31.5438	371
chr1	52119033	52120311	ATACpk_peak_386	315	.	8.67298	34.257	31.5438	371
chr1	52119033	52120311	ATACpk_peak_386	315	.	8.67298	34.257	31.5438	371
chr1	52170248	52170507	ATACpk_peak_387	48	.	3.43646	6.9363	4.82981	888
chr1	52171162	52171425	ATACpk_peak_387	48	.	3.43646	6.9363	4.82981	888
chr1	52232213	52233674	ATACpk_peak_388	886	.	16.6914	91.9134	88.6565	1222
chr1	52232092	52233674	ATACpk_peak_388	886	.	16.6914	91.9134	88.6565	1222
chr1	52232092	52233674	ATACpk_peak_388	886	.	16.6914	91.9134	88.6565	1222
chr1	52400024	52400788	ATACpk_peak_389	87	.	4.41831	11.0403	8.76842	346
chr1	52400024	52400724	ATACpk_peak_389	87	.	4.41831	11.0403	8.76842	346
chr1	52400024	52400572	ATACpk_peak_389	87	.	4.41831	11.0403	8.76842	346
chr1	52500256	52500849	ATACpk_peak_390	285	.	8.18205	31.232	28.5588	403
chr1	52500369	52501090	ATACpk_peak_390	285	.	8.18205	31.232	28.5588	403
chr1	52500118	52501005	ATACpk_peak_390	285	.	8.18205	31.232	28.5588	403
chr1	52630199	52631223	ATACpk_peak_391	315	.	8.67298	34.257	31.5438	496
chr1	52630199	52631223	ATACpk_peak_391	315	.	8.67298	34.257	31.5438	496
chr1	52630199	52631223	ATACpk_peak_391	315	.	8.67298	34.257	31.5438	496
chr1	52844232	52846126	ATACpk_peak_392	1390	.	22.7461	142.705	139.064	751
chr1	52844232	52846063	ATACpk_peak_392	1390	.	22.7461	142.705	139.064	751
chr1	52844232	52846048	ATACpk_peak_392	1390	.	22.7461	142.705	139.064	751
chr1	52852067	52853097	ATACpk_peak_393	149	.	5.72744	17.3702	14.9306	540
chr1	52852019	52853097	ATACpk_peak_393	149	.	5.72744	17.3702	14.9306	540
chr1	52852083	52852866	ATACpk_peak_393	149	.	5.72744	17.3702	14.9306	540
chr1	52961832	52963593	ATACpk_peak_395	80	.	4.25467	10.3139	8.06645	1351
chr1	52961246	52963593	ATACpk_peak_395	80	.	4.25467	10.3139	8.06645	1351
chr1	52961756	52963593	ATACpk_peak_395	80	.	4.25467	10.3139	8.06645	1351
chr1	53175550	53176089	ATACpk_peak_396	31	.	2.94554	5.13962	3.13965	48
chr1	53187224	53188211	ATACpk_peak_397	157	.	5.89108	18.2199	15.7621	463
chr1	53187224	53188210	ATACpk_peak_397	157	.	5.89108	18.2199	15.7621	463
chr1	53187224	53188211	ATACpk_peak_397	157	.	5.89108	18.2199	15.7621	463
chr1	53296591	53297567	ATACpk_peak_398	625	.	13.2549	65.5664	62.5256	494
chr1	53296621	53297554	ATACpk_peak_398	625	.	13.2549	65.5664	62.5256	494
chr1	53296625	53297590	ATACpk_peak_398	625	.	13.2549	65.5664	62.5256	494
chr1	53313423	53313708	ATACpk_peak_399	102	.	4.74559	12.5391	10.2211	293
chr1	53313357	53313708	ATACpk_peak_399	102	.	4.74559	12.5391	10.2211	293
chr1	53313357	53313708	ATACpk_peak_399	102	.	4.74559	12.5391	10.2211	293
chr1	53352310	53352812	ATACpk_peak_400	256	.	7.69113	28.284	25.6527	397
chr1	53352310	53352809	ATACpk_peak_400	256	.	7.69113	28.284	25.6527	397
chr1	53352310	53352812	ATACpk_peak_400	256	.	7.69113	28.284	25.6527	397
chr1	53389024	53389469	ATACpk_peak_401	48	.	3.43646	6.9363	4.82981	272
chr1	53388979	53389449	ATACpk_peak_401	48	.	3.43646	6.9363	4.82981	272
chr1	53388924	53389634	ATACpk_peak_401	48	.	3.43646	6.9363	4.82981	272
chr1	53706032	53707213	ATACpk_peak_402	377	.	9.65482	40.5215	37.7307	755
chr1	53706032	53707223	ATACpk_peak_402	377	.	9.65482	40.5215	37.7307	755
chr1	53706032	53707223	ATACpk_peak_402	377	.	9.65482	40.5215	37.7307	755
chr1	53784333	53785984	ATACpk_peak_403	1390	.	22.7461	142.705	139.064	871
chr1	53784333	53785984	ATACpk_peak_403	1390	.	22.7461	142.705	139.064	871
chr1	53784333	53785984	ATACpk_peak_403	1390	.	22.7461	142.705	139.064	871
chr1	54194644	54195057	ATACpk_peak_404	94	.	4.58195	11.7822	9.48674	243
chr1	54194644	54195182	ATACpk_peak_404	94	.	4.58195	11.7822	9.48674	243
chr1	54194644	54195203	ATACpk_peak_404	94	.	4.58195	11.7822	9.48674	243
chr1	54250181	54251432	ATACpk_peak_405	601	.	12.9276	63.1711	60.1517	527
chr1	54250181	54251352	ATACpk_peak_405	601	.	12.9276	63.1711	60.1517	527
chr1	54250238	54251432	ATACpk_peak_405	601	.	12.9276	63.1711	60.1517	527
chr1	54329322	54330840	ATACpk_peak_406	192	.	6.54564	21.7337	19.2077	564
chr1	54329322	54330641	ATACpk_peak_406	192	.	6.54564	21.7337	19.2077	564
chr1	54329322	54330842	ATACpk_peak_406	192	.	6.54564	21.7337	19.2077	564
chr1	54438617	54439279	ATACpk_peak_408	285	.	8.18205	31.232	28.5588	430
chr1	54438658	54439279	ATACpk_peak_408	285	.	8.18205	31.232	28.5588	430
chr1	54438617	54439279	ATACpk_peak_408	285	.	8.18205	31.232	28.5588	430
chr1	54557215	54558319	ATACpk_peak_409	566	.	12.4367	59.6192	56.6332	498
chr1	54557162	54558451	ATACpk_peak_409	566	.	12.4367	59.6192	56.6332	498
chr1	54557157	54558500	ATACpk_peak_409	566	.	12.4367	59.6192	56.6332	498
chr1	54925803	54926696	ATACpk_peak_412	475	.	11.1276	50.4027	47.5056	569
chr1	54925648	54926688	ATACpk_peak_412	475	.	11.1276	50.4027	47.5056	569
chr1	54925645	54926796	ATACpk_peak_412	475	.	11.1276	50.4027	47.5056	569
chr1	55026768	55029054	ATACpk_peak_413	938	.	17.346	97.1566	93.8588	680
chr1	55026768	55029054	ATACpk_peak_413	938	.	17.346	97.1566	93.8588	680
chr1	55026768	55029054	ATACpk_peak_413	938	.	17.346	97.1566	93.8588	680
chr1	55029940	55030015	ATACpk_peak_414	26	.	2.7819	4.58445	2.62542	350
chr1	55029940	55030357	ATACpk_peak_414	26	.	2.7819	4.58445	2.62542	350
chr1	55031149	55031188	ATACpk_peak_415	67	.	3.92739	8.91008	6.7148	193
chr1	55031567	55031900	ATACpk_peak_415	67	.	3.92739	8.91008	6.7148	193
chr1	55052163	55053590	ATACpk_peak_416	1726	.	26.5098	176.519	172.672	859
chr1	55052105	55053456	ATACpk_peak_416	1726	.	26.5098	176.519	172.672	859
chr1	55051950	55053575	ATACpk_peak_416	1726	.	26.5098	176.519	172.672	859
chr1	55073921	55076231	ATACpk_peak_417	430	.	10.473	45.9435	43.0924	1077
chr1	55073921	55076121	ATACpk_peak_417	430	.	10.473	45.9435	43.0924	1077
chr1	55073921	55076231	ATACpk_peak_417	430	.	10.473	45.9435	43.0924	1077
chr1	55087169	55088891	ATACpk_peak_418	1771	.	27.0008	181.038	177.167	967
chr1	55087103	55088908	ATACpk_peak_418	1771	.	27.0008	181.038	177.167	967
chr1	55087092	55089134	ATACpk_peak_418	1771	.	27.0008	181.038	177.167	967
chr1	55130808	55131945	ATACpk_peak_419	925	.	17.1823	95.8396	92.5523	411
chr1	55130808	55131907	ATACpk_peak_419	925	.	17.1823	95.8396	92.5523	411
chr1	55130808	55132068	ATACpk_peak_419	925	.	17.1823	95.8396	92.5523	411
chr1	55236148	55239073	ATACpk_peak_420	1462	.	23.5643	149.924	146.235	1073
chr1	55236148	55239073	ATACpk_peak_420	1462	.	23.5643	149.924	146.235	1073
chr1	55236148	55239073	ATACpk_peak_420	1462	.	23.5643	149.924	146.235	1073
chr1	55239365	55239738	ATACpk_peak_421	31	.	2.94554	5.13962	3.13965	215
chr1	55239365	55239699	ATACpk_peak_421	31	.	2.94554	5.13962	3.13965	215
chr1	55239365	55239514	ATACpk_peak_421	31	.	2.94554	5.13962	3.13965	215
chr1	55242469	55242471	ATACpk_peak_422	36	.	3.10918	5.71735	3.67934	80
chr1	55358391	55358681	ATACpk_peak_423	26	.	2.7819	4.58445	2.62542	61
chr1	55359248	55359777	ATACpk_peak_424	26	.	2.7819	4.58445	2.62542	112
chr1	55362158	55364028	ATACpk_peak_425	1263	.	21.2733	129.908	126.361	701
chr1	55362158	55364028	ATACpk_peak_425	1263	.	21.2733	129.908	126.361	701
chr1	55362158	55364028	ATACpk_peak_425	1263	.	21.2733	129.908	126.361	701
chr1	55405180	55406501	ATACpk_peak_426	1004	.	18.1642	103.802	100.452	683
chr1	55405212	55406668	ATACpk_peak_426	1004	.	18.1642	103.802	100.452	683
chr1	55405212	55406657	ATACpk_peak_426	1004	.	18.1642	103.802	100.452	683
chr1	55874323	55874607	ATACpk_peak_427	31	.	2.94554	5.13962	3.13965	7
chr1	56018374	56018980	ATACpk_peak_428	102	.	4.74559	12.5391	10.2211	120
chr1	56018426	56018980	ATACpk_peak_428	102	.	4.74559	12.5391	10.2211	120
chr1	56018342	56018980	ATACpk_peak_428	102	.	4.74559	12.5391	10.2211	120
chr1	56030876	56031251	ATACpk_peak_429	36	.	3.10918	5.71735	3.67934	673
chr1	56972607	56973541	ATACpk_peak_430	125	.	5.23651	14.8952	12.5135	458
chr1	56972607	56973541	ATACpk_peak_430	125	.	5.23651	14.8952	12.5135	458
chr1	56972607	56973541	ATACpk_peak_430	125	.	5.23651	14.8952	12.5135	458
chr1	57377250	57378279	ATACpk_peak_431	847	.	16.2005	88.0253	84.7991	375
chr1	57377250	57378189	ATACpk_peak_431	847	.	16.2005	88.0253	84.7991	375
chr1	57377250	57378457	ATACpk_peak_431	847	.	16.2005	88.0253	84.7991	375
chr1	57406145	57406978	ATACpk_peak_432	266	.	7.85477	29.2578	26.6125	417
chr1	57406241	57406978	ATACpk_peak_432	266	.	7.85477	29.2578	26.6125	417
chr1	57406040	57406978	ATACpk_peak_432	266	.	7.85477	29.2578	26.6125	417
chr1	57775026	57775328	ATACpk_peak_433	36	.	3.10918	5.71735	3.67934	205
chr1	57775026	57775328	ATACpk_peak_433	36	.	3.10918	5.71735	3.67934	205
chr1	57775026	57775328	ATACpk_peak_433	36	.	3.10918	5.71735	3.67934	205
chr1	57969573	57970297	ATACpk_peak_434	697	.	14.2368	72.878	69.7738	530
chr1	57969573	57970297	ATACpk_peak_434	697	.	14.2368	72.878	69.7738	530
chr1	57969573	57970297	ATACpk_peak_434	697	.	14.2368	72.878	69.7738	530
chr1	57984914	57985402	ATACpk_peak_435	48	.	3.43646	6.9363	4.82981	391
chr1	57984990	57985402	ATACpk_peak_435	48	.	3.43646	6.9363	4.82981	391
chr1	57984914	57985402	ATACpk_peak_435	48	.	3.43646	6.9363	4.82981	391
chr1	57989568	57990357	ATACpk_peak_436	48	.	3.43646	6.9363	4.82981	525
chr1	57989780	57990339	ATACpk_peak_436	48	.	3.43646	6.9363	4.82981	525
chr1	57989568	57990367	ATACpk_peak_436	48	.	3.43646	6.9363	4.82981	525
chr1	57995689	57996634	ATACpk_peak_437	589	.	12.764	61.9816	58.9732	425
chr1	57995680	57996639	ATACpk_peak_437	589	.	12.764	61.9816	58.9732	425
chr1	57995580	57996639	ATACpk_peak_437	589	.	12.764	61.9816	58.9732	425
chr1	58029806	58030166	ATACpk_peak_438	54	.	3.6001	7.57567	5.43791	129
chr1	58029832	58030166	ATACpk_peak_438	54	.	3.6001	7.57567	5.43791	129
chr1	58031324	58031357	ATACpk_peak_439	31	.	2.94554	5.13962	3.13965	69
chr1	58044933	58045917	ATACpk_peak_440	125	.	5.23651	14.8952	12.5135	484
chr1	58045002	58045932	ATACpk_peak_440	125	.	5.23651	14.8952	12.5135	484
chr1	58044933	58045932	ATACpk_peak_440	125	.	5.23651	14.8952	12.5135	484
chr1	58105326	58106131	ATACpk_peak_441	117	.	5.07287	14.0961	11.7349	500
chr1	58105326	58106131	ATACpk_peak_441	117	.	5.07287	14.0961	11.7349	500
chr1	58105326	58106131	ATACpk_peak_441	117	.	5.07287	14.0961	11.7349	500
chr1	58392162	58393862	ATACpk_peak_442	1235	.	20.9461	127.1	123.574	972
chr1	58392294	58393892	ATACpk_peak_442	1235	.	20.9461	127.1	123.574	972
chr1	58392069	58393892	ATACpk_peak_442	1235	.	20.9461	127.1	123.574	972
chr1	58408273	58408306	ATACpk_peak_443	31	.	2.94554	5.13962	3.13965	279
chr1	58409435	58409589	ATACpk_peak_444	42	.	3.27282	6.31656	4.24321	345
chr1	58408913	58409589	ATACpk_peak_444	42	.	3.27282	6.31656	4.24321	345
chr1	58408879	58409589	ATACpk_peak_444	42	.	3.27282	6.31656	4.24321	345
chr1	58423083	58424599	ATACpk_peak_445	398	.	9.9821	42.6693	39.854	729
chr1	58423083	58424986	ATACpk_peak_445	398	.	9.9821	42.6693	39.854	729
chr1	58423083	58425092	ATACpk_peak_445	398	.	9.9821	42.6693	39.854	729
chr1	58425003	58425092	ATACpk_peak_445	398	.	9.9821	42.6693	39.854	729
chr1	58445021	58445807	ATACpk_peak_446	486	.	11.2912	51.5335	48.6251	472
chr1	58444986	58445807	ATACpk_peak_446	486	.	11.2912	51.5335	48.6251	472
chr1	58444986	58445807	ATACpk_peak_446	486	.	11.2912	51.5335	48.6251	472
chr1	58504281	58505392	ATACpk_peak_447	991	.	18.0005	102.465	99.1257	891
chr1	58504281	58505392	ATACpk_peak_447	991	.	18.0005	102.465	99.1257	891
chr1	58504101	58505392	ATACpk_peak_447	991	.	18.0005	102.465	99.1257	891
chr1	58585858	58586931	ATACpk_peak_448	200	.	6.70928	22.6394	20.0973	434
chr1	58585858	58586841	ATACpk_peak_448	200	.	6.70928	22.6394	20.0973	434
chr1	58585858	58586846	ATACpk_peak_448	200	.	6.70928	22.6394	20.0973	434
chr1	58652659	58653082	ATACpk_peak_449	67	.	3.92739	8.91008	6.7148	188
chr1	58652659	58653296	ATACpk_peak_449	67	.	3.92739	8.91008	6.7148	188
chr1	58652659	58653296	ATACpk_peak_449	67	.	3.92739	8.91008	6.7148	188
chr1	58654590	58654867	ATACpk_peak_450	54	.	3.6001	7.57567	5.43791	182
chr1	58695379	58697734	ATACpk_peak_451	305	.	8.50933	33.2403	30.5403	620
chr1	58695379	58697734	ATACpk_peak_451	305	.	8.50933	33.2403	30.5403	620
chr1	58695379	58697697	ATACpk_peak_451	305	.	8.50933	33.2403	30.5403	620
chr1	58704028	58704324	ATACpk_peak_452	109	.	4.90923	13.3106	10.9706	179
chr1	58704028	58704276	ATACpk_peak_452	109	.	4.90923	13.3106	10.9706	179
chr1	58706627	58706912	ATACpk_peak_453	133	.	5.40015	15.7075	13.306	138
chr1	58706627	58706885	ATACpk_peak_453	133	.	5.40015	15.7075	13.306	138
chr1	58711172	58712689	ATACpk_peak_454	209	.	6.87292	23.5555	20.9978	499
chr1	58711172	58712537	ATACpk_peak_454	209	.	6.87292	23.5555	20.9978	499
chr1	58711172	58713585	ATACpk_peak_454	209	.	6.87292	23.5555	20.9978	499
chr1	58802492	58802844	ATACpk_peak_455	48	.	3.43646	6.9363	4.82981	125
chr1	58802544	58802844	ATACpk_peak_455	48	.	3.43646	6.9363	4.82981	125
chr1	58802492	58802844	ATACpk_peak_455	48	.	3.43646	6.9363	4.82981	125
chr1	58895663	58896231	ATACpk_peak_456	48	.	3.43646	6.9363	4.82981	367
chr1	58897038	58897514	ATACpk_peak_456	48	.	3.43646	6.9363	4.82981	367
chr1	58895663	58896012	ATACpk_peak_456	48	.	3.43646	6.9363	4.82981	367
chr1	58896953	58897514	ATACpk_peak_456	48	.	3.43646	6.9363	4.82981	367
chr1	58895663	58897514	ATACpk_peak_456	48	.	3.43646	6.9363	4.82981	367
chr1	58973034	58974187	ATACpk_peak_457	860	.	16.3641	89.3171	86.0807	532
chr1	58973034	58974187	ATACpk_peak_457	860	.	16.3641	89.3171	86.0807	532
chr1	58973034	58974187	ATACpk_peak_457	860	.	16.3641	89.3171	86.0807	532
chr1	59031884	59032011	ATACpk_peak_458	21	.	2.61826	4.05299	2.13804	317
chr1	59031479	59032011	ATACpk_peak_458	21	.	2.61826	4.05299	2.13804	317
chr1	59080855	59081134	ATACpk_peak_459	31	.	2.94554	5.13962	3.13965	175
chr1	59080855	59081206	ATACpk_peak_459	31	.	2.94554	5.13962	3.13965	175
chr1	59094470	59095170	ATACpk_peak_460	228	.	7.20021	25.418	22.83	409
chr1	59094470	59095170	ATACpk_peak_460	228	.	7.20021	25.418	22.83	409
chr1	59094470	59095170	ATACpk_peak_460	228	.	7.20021	25.418	22.83	409
chr1	59119323	59121366	ATACpk_peak_462	1534	.	24.3825	157.219	153.485	830
chr1	59119309	59121622	ATACpk_peak_462	1534	.	24.3825	157.219	153.485	830
chr1	59119254	59121622	ATACpk_peak_462	1534	.	24.3825	157.219	153.485	830
chr1	59171278	59172662	ATACpk_peak_463	87	.	4.41831	11.0403	8.76842	976
chr1	59171278	59172662	ATACpk_peak_463	87	.	4.41831	11.0403	8.76842	976
chr1	59171278	59172662	ATACpk_peak_463	87	.	4.41831	11.0403	8.76842	976
chr1	59236599	59238398	ATACpk_peak_464	1376	.	22.5825	141.27	137.64	707
chr1	59236599	59238341	ATACpk_peak_464	1376	.	22.5825	141.27	137.64	707
chr1	59236599	59238390	ATACpk_peak_464	1376	.	22.5825	141.27	137.64	707
chr1	59400717	59401097	ATACpk_peak_465	54	.	3.6001	7.57567	5.43791	224
chr1	59400717	59401097	ATACpk_peak_465	54	.	3.6001	7.57567	5.43791	224
chr1	59400717	59401097	ATACpk_peak_465	54	.	3.6001	7.57567	5.43791	224
chr1	59481792	59482481	ATACpk_peak_466	166	.	6.05472	19.0814	16.6059	611
chr1	59481725	59482481	ATACpk_peak_466	166	.	6.05472	19.0814	16.6059	611
chr1	59481428	59482481	ATACpk_peak_466	166	.	6.05472	19.0814	16.6059	611
chr1	59540717	59541345	ATACpk_peak_468	87	.	4.41831	11.0403	8.76842	567
chr1	59540679	59541345	ATACpk_peak_468	87	.	4.41831	11.0403	8.76842	567
chr1	59561453	59561638	ATACpk_peak_469	21	.	2.61826	4.05299	2.13804	205
chr1	59561453	59561749	ATACpk_peak_469	21	.	2.61826	4.05299	2.13804	205
chr1	59562216	59563273	ATACpk_peak_470	80	.	4.25467	10.3139	8.06645	957
chr1	59562648	59563273	ATACpk_peak_470	80	.	4.25467	10.3139	8.06645	957
chr1	59562216	59563273	ATACpk_peak_470	80	.	4.25467	10.3139	8.06645	957
chr1	59604062	59604528	ATACpk_peak_471	102	.	4.74559	12.5391	10.2211	192
chr1	59604058	59604528	ATACpk_peak_471	102	.	4.74559	12.5391	10.2211	192
chr1	59603993	59604528	ATACpk_peak_471	102	.	4.74559	12.5391	10.2211	192
chr1	59606430	59607312	ATACpk_peak_472	125	.	5.23651	14.8952	12.5135	339
chr1	59606430	59607312	ATACpk_peak_472	125	.	5.23651	14.8952	12.5135	339
chr1	59606430	59607312	ATACpk_peak_472	125	.	5.23651	14.8952	12.5135	339
chr1	59619172	59619700	ATACpk_peak_473	174	.	6.21836	19.9544	17.4617	440
chr1	59619000	59619700	ATACpk_peak_473	174	.	6.21836	19.9544	17.4617	440
chr1	59669980	59671276	ATACpk_peak_474	886	.	16.6914	91.9134	88.6565	820
chr1	59670077	59671264	ATACpk_peak_474	886	.	16.6914	91.9134	88.6565	820
chr1	59669963	59671276	ATACpk_peak_474	886	.	16.6914	91.9134	88.6565	820
chr1	59684503	59685855	ATACpk_peak_475	531	.	11.9458	56.1184	53.1654	704
chr1	59684309	59685855	ATACpk_peak_475	531	.	11.9458	56.1184	53.1654	704
chr1	59684309	59685855	ATACpk_peak_475	531	.	11.9458	56.1184	53.1654	704
chr1	59762791	59764186	ATACpk_peak_476	237	.	7.36385	26.3639	23.7612	931
chr1	59762791	59764186	ATACpk_peak_476	237	.	7.36385	26.3639	23.7612	931
chr1	59762791	59764186	ATACpk_peak_476	237	.	7.36385	26.3639	23.7612	931
chr1	59912275	59914103	ATACpk_peak_477	978	.	17.8369	101.132	97.8028	731
chr1	59912463	59913899	ATACpk_peak_477	978	.	17.8369	101.132	97.8028	731
chr1	59912249	59914019	ATACpk_peak_477	978	.	17.8369	101.132	97.8028	731
chr1	59947793	59948492	ATACpk_peak_478	543	.	12.1094	57.2795	54.3155	443
chr1	59947793	59948514	ATACpk_peak_478	543	.	12.1094	57.2795	54.3155	443
chr1	59947793	59948703	ATACpk_peak_478	543	.	12.1094	57.2795	54.3155	443
chr1	59987575	59987849	ATACpk_peak_479	21	.	2.61826	4.05299	2.13804	14
chr1	60007444	60007693	ATACpk_peak_480	42	.	3.27282	6.31656	4.24321	81
chr1	60007444	60007935	ATACpk_peak_480	42	.	3.27282	6.31656	4.24321	81
chr1	60042536	60044176	ATACpk_peak_481	209	.	6.87292	23.5555	20.9978	872
chr1	60042536	60044176	ATACpk_peak_481	209	.	6.87292	23.5555	20.9978	872
chr1	60042548	60044176	ATACpk_peak_481	209	.	6.87292	23.5555	20.9978	872
chr1	60097240	60098896	ATACpk_peak_482	747	.	14.8913	77.8523	74.7072	1036
chr1	60097240	60098873	ATACpk_peak_482	747	.	14.8913	77.8523	74.7072	1036
chr1	60097240	60098896	ATACpk_peak_482	747	.	14.8913	77.8523	74.7072	1036
chr1	60179737	60181129	ATACpk_peak_483	1112	.	19.4733	114.635	111.204	847
chr1	60179671	60181134	ATACpk_peak_483	1112	.	19.4733	114.635	111.204	847
chr1	60179671	60181134	ATACpk_peak_483	1112	.	19.4733	114.635	111.204	847
chr1	60342951	60344072	ATACpk_peak_484	247	.	7.52749	27.3193	24.7022	551
chr1	60342951	60344072	ATACpk_peak_484	247	.	7.52749	27.3193	24.7022	551
chr1	60342971	60344072	ATACpk_peak_484	247	.	7.52749	27.3193	24.7022	551
chr1	60409010	60410250	ATACpk_peak_485	673	.	13.9095	70.4203	67.3369	651
chr1	60409010	60410250	ATACpk_peak_485	673	.	13.9095	70.4203	67.3369	651
chr1	60409010	60410250	ATACpk_peak_485	673	.	13.9095	70.4203	67.3369	651
chr1	60488490	60489110	ATACpk_peak_486	60	.	3.76374	8.23385	6.06661	383
chr1	60488520	60489110	ATACpk_peak_486	60	.	3.76374	8.23385	6.06661	383
chr1	60488490	60489110	ATACpk_peak_486	60	.	3.76374	8.23385	6.06661	383
chr1	60489464	60489806	ATACpk_peak_487	31	.	2.94554	5.13962	3.13965	193
chr1	60489464	60489740	ATACpk_peak_487	31	.	2.94554	5.13962	3.13965	193
chr1	60489464	60489811	ATACpk_peak_487	31	.	2.94554	5.13962	3.13965	193
chr1	60566319	60567531	ATACpk_peak_488	661	.	13.7458	69.1991	66.1262	494
chr1	60566319	60567492	ATACpk_peak_488	661	.	13.7458	69.1991	66.1262	494
chr1	60566319	60567531	ATACpk_peak_488	661	.	13.7458	69.1991	66.1262	494
chr1	60823091	60823188	ATACpk_peak_489	67	.	3.92739	8.91008	6.7148	547
chr1	60920553	60921341	ATACpk_peak_490	109	.	4.90923	13.3106	10.9706	735
chr1	60920548	60921341	ATACpk_peak_490	109	.	4.90923	13.3106	10.9706	735
chr1	60920512	60921341	ATACpk_peak_490	109	.	4.90923	13.3106	10.9706	735
chr1	60981851	60982204	ATACpk_peak_491	36	.	3.10918	5.71735	3.67934	323
chr1	60981851	60982204	ATACpk_peak_491	36	.	3.10918	5.71735	3.67934	323
chr1	60981851	60982204	ATACpk_peak_491	36	.	3.10918	5.71735	3.67934	323
chr1	61497854	61499520	ATACpk_peak_492	157	.	5.89108	18.2199	15.7621	1053
chr1	61497735	61499545	ATACpk_peak_492	157	.	5.89108	18.2199	15.7621	1053
chr1	61497860	61499498	ATACpk_peak_492	157	.	5.89108	18.2199	15.7621	1053
chr1	61514493	61515273	ATACpk_peak_493	80	.	4.25467	10.3139	8.06645	417
chr1	61514417	61515235	ATACpk_peak_493	80	.	4.25467	10.3139	8.06645	417
chr1	61514474	61515277	ATACpk_peak_493	80	.	4.25467	10.3139	8.06645	417
chr1	61638744	61639121	ATACpk_peak_494	117	.	5.07287	14.0961	11.7349	181
chr1	61638744	61639121	ATACpk_peak_494	117	.	5.07287	14.0961	11.7349	181
chr1	61638744	61639121	ATACpk_peak_494	117	.	5.07287	14.0961	11.7349	181
chr1	62743551	62744418	ATACpk_peak_495	60	.	3.76374	8.23385	6.06661	65
chr1	62743603	62744404	ATACpk_peak_495	60	.	3.76374	8.23385	6.06661	65
chr1	62743562	62744458	ATACpk_peak_495	60	.	3.76374	8.23385	6.06661	65
chr1	62794200	62796336	ATACpk_peak_496	247	.	7.52749	27.3193	24.7022	1578
chr1	62794200	62796336	ATACpk_peak_496	247	.	7.52749	27.3193	24.7022	1578
chr1	62794231	62796336	ATACpk_peak_496	247	.	7.52749	27.3193	24.7022	1578
chr1	62902831	62903432	ATACpk_peak_497	54	.	3.6001	7.57567	5.43791	375
chr1	62902831	62903432	ATACpk_peak_497	54	.	3.6001	7.57567	5.43791	375
chr1	62902831	62903432	ATACpk_peak_497	54	.	3.6001	7.57567	5.43791	375
chr1	62982705	62982916	ATACpk_peak_498	54	.	3.6001	7.57567	5.43791	439
chr1	62982531	62982808	ATACpk_peak_498	54	.	3.6001	7.57567	5.43791	439
chr1	62982343	62982916	ATACpk_peak_498	54	.	3.6001	7.57567	5.43791	439
chr1	63113089	63114713	ATACpk_peak_499	247	.	7.52749	27.3193	24.7022	1557
chr1	63112770	63114713	ATACpk_peak_499	247	.	7.52749	27.3193	24.7022	1557
chr1	63112916	63114713	ATACpk_peak_499	247	.	7.52749	27.3193	24.7022	1557
chr1	63176299	63177549	ATACpk_peak_500	531	.	11.9458	56.1184	53.1654	547
chr1	63176299	63177583	ATACpk_peak_500	531	.	11.9458	56.1184	53.1654	547
chr1	63176299	63177583	ATACpk_peak_500	531	.	11.9458	56.1184	53.1654	547
chr1	63185420	63185737	ATACpk_peak_501	256	.	7.69113	28.284	25.6527	194
chr1	63185420	63185737	ATACpk_peak_501	256	.	7.69113	28.284	25.6527	194
chr1	63185420	63185838	ATACpk_peak_501	256	.	7.69113	28.284	25.6527	194
chr1	63204112	63204589	ATACpk_peak_502	67	.	3.92739	8.91008	6.7148	697
chr1	63247285	63248641	ATACpk_peak_503	133	.	5.40015	15.7075	13.306	1183
chr1	63247119	63248641	ATACpk_peak_503	133	.	5.40015	15.7075	13.306	1183
chr1	63247119	63248641	ATACpk_peak_503	133	.	5.40015	15.7075	13.306	1183
chr1	63272684	63273974	ATACpk_peak_504	797	.	15.5459	82.9025	79.7165	576
chr1	63272684	63274091	ATACpk_peak_504	797	.	15.5459	82.9025	79.7165	576
chr1	63272684	63274091	ATACpk_peak_504	797	.	15.5459	82.9025	79.7165	576
chr1	63445758	63446355	ATACpk_peak_505	102	.	4.74559	12.5391	10.2211	289
chr1	63445692	63446355	ATACpk_peak_505	102	.	4.74559	12.5391	10.2211	289
chr1	63445743	63446355	ATACpk_peak_505	102	.	4.74559	12.5391	10.2211	289
chr1	63693796	63694118	ATACpk_peak_507	31	.	2.94554	5.13962	3.13965	142
chr1	63694041	63694462	ATACpk_peak_507	31	.	2.94554	5.13962	3.13965	142
chr1	63730306	63730704	ATACpk_peak_508	200	.	6.70928	22.6394	20.0973	267
chr1	63730131	63730692	ATACpk_peak_508	200	.	6.70928	22.6394	20.0973	267
chr1	63730131	63730805	ATACpk_peak_508	200	.	6.70928	22.6394	20.0973	267
chr1	63886520	63887085	ATACpk_peak_509	48	.	3.43646	6.9363	4.82981	170
chr1	63886337	63887085	ATACpk_peak_509	48	.	3.43646	6.9363	4.82981	170
chr1	64121644	64122282	ATACpk_peak_510	157	.	5.89108	18.2199	15.7621	189
chr1	64121535	64122458	ATACpk_peak_510	157	.	5.89108	18.2199	15.7621	189
chr1	64121535	64122436	ATACpk_peak_510	157	.	5.89108	18.2199	15.7621	189
chr1	64529785	64530098	ATACpk_peak_511	31	.	2.94554	5.13962	3.13965	341
chr1	64531560	64533291	ATACpk_peak_512	1376	.	22.5825	141.27	137.64	1198
chr1	64531560	64533291	ATACpk_peak_512	1376	.	22.5825	141.27	137.64	1198
chr1	64531560	64533291	ATACpk_peak_512	1376	.	22.5825	141.27	137.64	1198
chr1	64616995	64617831	ATACpk_peak_513	157	.	5.89108	18.2199	15.7621	394
chr1	64616995	64617828	ATACpk_peak_513	157	.	5.89108	18.2199	15.7621	394
chr1	64616995	64617831	ATACpk_peak_513	157	.	5.89108	18.2199	15.7621	394
chr1	64689886	64691722	ATACpk_peak_514	964	.	17.6732	99.8028	96.4843	1120
chr1	64689620	64691722	ATACpk_peak_514	964	.	17.6732	99.8028	96.4843	1120
chr1	64689934	64691722	ATACpk_peak_514	964	.	17.6732	99.8028	96.4843	1120
chr1	64735517	64736421	ATACpk_peak_515	54	.	3.6001	7.57567	5.43791	776
chr1	64735227	64736421	ATACpk_peak_515	54	.	3.6001	7.57567	5.43791	776
chr1	64736948	64738833	ATACpk_peak_516	613	.	13.0913	64.3661	61.3358	989
chr1	64736948	64738996	ATACpk_peak_516	613	.	13.0913	64.3661	61.3358	989
chr1	64736948	64738996	ATACpk_peak_516	613	.	13.0913	64.3661	61.3358	989
chr1	64798713	64800362	ATACpk_peak_517	285	.	8.18205	31.232	28.5588	813
chr1	64798713	64800405	ATACpk_peak_517	285	.	8.18205	31.232	28.5588	813
chr1	64798713	64800170	ATACpk_peak_517	285	.	8.18205	31.232	28.5588	813
chr1	64956532	64957324	ATACpk_peak_518	166	.	6.05472	19.0814	16.6059	288
chr1	64956532	64957324	ATACpk_peak_518	166	.	6.05472	19.0814	16.6059	288
chr1	64956532	64957324	ATACpk_peak_518	166	.	6.05472	19.0814	16.6059	288
chr1	65050879	65051180	ATACpk_peak_519	31	.	2.94554	5.13962	3.13965	79
chr1	65178557	65179777	ATACpk_peak_520	157	.	5.89108	18.2199	15.7621	657
chr1	65178557	65179777	ATACpk_peak_520	157	.	5.89108	18.2199	15.7621	657
chr1	65178557	65179777	ATACpk_peak_520	157	.	5.89108	18.2199	15.7621	657
chr1	65185713	65187246	ATACpk_peak_521	1319	.	21.9279	135.563	131.974	860
chr1	65185713	65187246	ATACpk_peak_521	1319	.	21.9279	135.563	131.974	860
chr1	65185713	65187246	ATACpk_peak_521	1319	.	21.9279	135.563	131.974	860
chr1	65948533	65949739	ATACpk_peak_523	87	.	4.41831	11.0403	8.76842	211
chr1	65948736	65949739	ATACpk_peak_523	87	.	4.41831	11.0403	8.76842	211
chr1	65948533	65949697	ATACpk_peak_523	87	.	4.41831	11.0403	8.76842	211
chr1	66467978	66468509	ATACpk_peak_524	285	.	8.18205	31.232	28.5588	220
chr1	66467978	66468509	ATACpk_peak_524	285	.	8.18205	31.232	28.5588	220
chr1	66467978	66468509	ATACpk_peak_524	285	.	8.18205	31.232	28.5588	220
chr1	66543985	66545070	ATACpk_peak_525	73	.	4.09103	9.60366	7.38177	463
chr1	66543985	66545201	ATACpk_peak_525	73	.	4.09103	9.60366	7.38177	463
chr1	66544365	66544695	ATACpk_peak_525	73	.	4.09103	9.60366	7.38177	463
chr1	66700500	66701500	ATACpk_peak_526	899	.	16.855	93.218	89.9511	354
chr1	66700500	66701500	ATACpk_peak_526	899	.	16.855	93.218	89.9511	354
chr1	66700500	66701500	ATACpk_peak_526	899	.	16.855	93.218	89.9511	354
chr1	66816180	66818413	ATACpk_peak_527	1578	.	24.8734	161.631	157.87	1361
chr1	66816180	66818413	ATACpk_peak_527	1578	.	24.8734	161.631	157.87	1361
chr1	66816180	66818413	ATACpk_peak_527	1578	.	24.8734	161.631	157.87	1361
chr1	66863040	66863373	ATACpk_peak_528	36	.	3.10918	5.71735	3.67934	288
chr1	66863040	66863230	ATACpk_peak_528	36	.	3.10918	5.71735	3.67934	288
chr1	66863040	66863281	ATACpk_peak_528	36	.	3.10918	5.71735	3.67934	288
chr1	67038233	67039768	ATACpk_peak_529	1004	.	18.1642	103.802	100.452	660
chr1	67038233	67039589	ATACpk_peak_529	1004	.	18.1642	103.802	100.452	660
chr1	67038233	67039768	ATACpk_peak_529	1004	.	18.1642	103.802	100.452	660
chr1	67246745	67247033	ATACpk_peak_530	174	.	6.21836	19.9544	17.4617	145
chr1	67246745	67247033	ATACpk_peak_530	174	.	6.21836	19.9544	17.4617	145
chr1	67246734	67247033	ATACpk_peak_530	174	.	6.21836	19.9544	17.4617	145
chr1	69107437	69107699	ATACpk_peak_531	42	.	3.27282	6.31656	4.24321	261
chr1	69107437	69107918	ATACpk_peak_531	42	.	3.27282	6.31656	4.24321	261
chr1	69107437	69107918	ATACpk_peak_531	42	.	3.27282	6.31656	4.24321	261
chr1	69231856	69232046	ATACpk_peak_532	26	.	2.7819	4.58445	2.62542	140
chr1	69231716	69232046	ATACpk_peak_532	26	.	2.7819	4.58445	2.62542	140
chr1	69377479	69377911	ATACpk_peak_533	36	.	3.10918	5.71735	3.67934	60
chr1	69377479	69377911	ATACpk_peak_533	36	.	3.10918	5.71735	3.67934	60
chr1	69377479	69377911	ATACpk_peak_533	36	.	3.10918	5.71735	3.67934	60
chr1	69687387	69687788	ATACpk_peak_534	80	.	4.25467	10.3139	8.06645	407
chr1	69687420	69687788	ATACpk_peak_534	80	.	4.25467	10.3139	8.06645	407
chr1	69687247	69687788	ATACpk_peak_534	80	.	4.25467	10.3139	8.06645	407
chr1	69826317	69827520	ATACpk_peak_535	1098	.	19.3096	113.268	109.847	615
chr1	69826416	69827538	ATACpk_peak_535	1098	.	19.3096	113.268	109.847	615
chr1	69826317	69827538	ATACpk_peak_535	1098	.	19.3096	113.268	109.847	615
chr1	69848194	69848698	ATACpk_peak_536	60	.	3.76374	8.23385	6.06661	184
chr1	69848155	69848738	ATACpk_peak_536	60	.	3.76374	8.23385	6.06661	184
chr1	69848226	69848708	ATACpk_peak_536	60	.	3.76374	8.23385	6.06661	184
chr1	69950789	69951098	ATACpk_peak_537	31	.	2.94554	5.13962	3.13965	730
chr1	71102111	71103735	ATACpk_peak_539	835	.	16.0368	86.738	83.5219	974
chr1	71101797	71103735	ATACpk_peak_539	835	.	16.0368	86.738	83.5219	974
chr1	71101802	71103735	ATACpk_peak_539	835	.	16.0368	86.738	83.5219	974
chr1	71507424	71507874	ATACpk_peak_540	117	.	5.07287	14.0961	11.7349	134
chr1	71507419	71507722	ATACpk_peak_540	117	.	5.07287	14.0961	11.7349	134
chr1	71556955	71557446	ATACpk_peak_541	315	.	8.67298	34.257	31.5438	203
chr1	71556971	71557446	ATACpk_peak_541	315	.	8.67298	34.257	31.5438	203
chr1	71556902	71557446	ATACpk_peak_541	315	.	8.67298	34.257	31.5438	203
chr1	71652789	71653933	ATACpk_peak_542	275	.	8.01841	30.2405	27.5812	534
chr1	71652789	71653950	ATACpk_peak_542	275	.	8.01841	30.2405	27.5812	534
chr1	71652789	71653950	ATACpk_peak_542	275	.	8.01841	30.2405	27.5812	534
chr1	71812297	71812727	ATACpk_peak_543	237	.	7.36385	26.3639	23.7612	255
chr1	71812198	71812759	ATACpk_peak_543	237	.	7.36385	26.3639	23.7612	255
chr1	71812252	71812711	ATACpk_peak_543	237	.	7.36385	26.3639	23.7612	255
chr1	71837392	71838597	ATACpk_peak_544	256	.	7.69113	28.284	25.6527	814
chr1	71837392	71838644	ATACpk_peak_544	256	.	7.69113	28.284	25.6527	814
chr1	71837392	71838644	ATACpk_peak_544	256	.	7.69113	28.284	25.6527	814
chr1	72166675	72167374	ATACpk_peak_545	48	.	3.43646	6.9363	4.82981	233
chr1	72166632	72167437	ATACpk_peak_545	48	.	3.43646	6.9363	4.82981	233
chr1	72166632	72167427	ATACpk_peak_545	48	.	3.43646	6.9363	4.82981	233
chr1	72211762	72213051	ATACpk_peak_546	463	.	10.964	49.2782	46.3924	815
chr1	72211764	72213051	ATACpk_peak_546	463	.	10.964	49.2782	46.3924	815
chr1	72211518	72213051	ATACpk_peak_546	463	.	10.964	49.2782	46.3924	815
chr1	72213728	72214575	ATACpk_peak_547	31	.	2.94554	5.13962	3.13965	100
chr1	72213453	72214644	ATACpk_peak_547	31	.	2.94554	5.13962	3.13965	100
chr1	72213453	72214644	ATACpk_peak_547	31	.	2.94554	5.13962	3.13965	100
chr1	72223629	72223919	ATACpk_peak_548	589	.	12.764	61.9816	58.9732	2763
chr1	72224334	72226619	ATACpk_peak_548	589	.	12.764	61.9816	58.9732	2763
chr1	72223305	72224356	ATACpk_peak_548	589	.	12.764	61.9816	58.9732	2763
chr1	72225259	72226619	ATACpk_peak_548	589	.	12.764	61.9816	58.9732	2763
chr1	72223295	72226619	ATACpk_peak_548	589	.	12.764	61.9816	58.9732	2763
chr1	72233752	72234419	ATACpk_peak_549	48	.	3.43646	6.9363	4.82981	509
chr1	72233752	72234419	ATACpk_peak_549	48	.	3.43646	6.9363	4.82981	509
chr1	72233752	72234418	ATACpk_peak_549	48	.	3.43646	6.9363	4.82981	509
chr1	72236425	72237182	ATACpk_peak_550	149	.	5.72744	17.3702	14.9306	280
chr1	72236425	72237198	ATACpk_peak_550	149	.	5.72744	17.3702	14.9306	280
chr1	72236425	72237129	ATACpk_peak_550	149	.	5.72744	17.3702	14.9306	280
chr1	72243718	72244477	ATACpk_peak_551	228	.	7.20021	25.418	22.83	343
chr1	72243718	72244694	ATACpk_peak_551	228	.	7.20021	25.418	22.83	343
chr1	72243718	72244532	ATACpk_peak_551	228	.	7.20021	25.418	22.83	343
chr1	72254601	72256004	ATACpk_peak_552	247	.	7.52749	27.3193	24.7022	399
chr1	72254601	72256004	ATACpk_peak_552	247	.	7.52749	27.3193	24.7022	399
chr1	72254601	72256004	ATACpk_peak_552	247	.	7.52749	27.3193	24.7022	399
chr1	72284199	72284404	ATACpk_peak_553	141	.	5.5638	16.5326	14.1119	186
chr1	72284199	72284710	ATACpk_peak_553	141	.	5.5638	16.5326	14.1119	186
chr1	72284199	72284710	ATACpk_peak_553	141	.	5.5638	16.5326	14.1119	186
chr1	72307356	72307656	ATACpk_peak_554	48	.	3.43646	6.9363	4.82981	79
chr1	72307334	72307656	ATACpk_peak_554	48	.	3.43646	6.9363	4.82981	79
chr1	72307299	72307656	ATACpk_peak_554	48	.	3.43646	6.9363	4.82981	79
chr1	72410204	72411368	ATACpk_peak_555	102	.	4.74559	12.5391	10.2211	907
chr1	72410217	72411368	ATACpk_peak_555	102	.	4.74559	12.5391	10.2211	907
chr1	72410198	72411368	ATACpk_peak_555	102	.	4.74559	12.5391	10.2211	907
chr1	72578367	72579639	ATACpk_peak_556	67	.	3.92739	8.91008	6.7148	286
chr1	72578627	72579639	ATACpk_peak_556	67	.	3.92739	8.91008	6.7148	286
chr1	72578531	72579639	ATACpk_peak_556	67	.	3.92739	8.91008	6.7148	286
chr1	72582418	72583803	ATACpk_peak_557	497	.	11.4549	52.6706	49.7511	1149
chr1	72582522	72584003	ATACpk_peak_557	497	.	11.4549	52.6706	49.7511	1149
chr1	72582572	72584268	ATACpk_peak_557	497	.	11.4549	52.6706	49.7511	1149
chr1	72640397	72642117	ATACpk_peak_558	228	.	7.20021	25.418	22.83	677
chr1	72640435	72642273	ATACpk_peak_558	228	.	7.20021	25.418	22.83	677
chr1	72640397	72642245	ATACpk_peak_558	228	.	7.20021	25.418	22.83	677
chr1	72700135	72701067	ATACpk_peak_559	305	.	8.50933	33.2403	30.5403	470
chr1	72700135	72701067	ATACpk_peak_559	305	.	8.50933	33.2403	30.5403	470
chr1	72700135	72701067	ATACpk_peak_559	305	.	8.50933	33.2403	30.5403	470
chr1	72710720	72711823	ATACpk_peak_560	305	.	8.50933	33.2403	30.5403	519
chr1	72710720	72711930	ATACpk_peak_560	305	.	8.50933	33.2403	30.5403	519
chr1	72710720	72712019	ATACpk_peak_560	305	.	8.50933	33.2403	30.5403	519
chr1	72855042	72855617	ATACpk_peak_561	54	.	3.6001	7.57567	5.43791	13
chr1	72855055	72855617	ATACpk_peak_561	54	.	3.6001	7.57567	5.43791	13
chr1	72855042	72855617	ATACpk_peak_561	54	.	3.6001	7.57567	5.43791	13
chr1	72856031	72857391	ATACpk_peak_562	285	.	8.18205	31.232	28.5588	490
chr1	72856031	72857118	ATACpk_peak_562	285	.	8.18205	31.232	28.5588	490
chr1	72856031	72857391	ATACpk_peak_562	285	.	8.18205	31.232	28.5588	490
chr1	72916887	72917444	ATACpk_peak_563	26	.	2.7819	4.58445	2.62542	364
chr1	72916887	72917444	ATACpk_peak_563	26	.	2.7819	4.58445	2.62542	364
chr1	72917055	72917444	ATACpk_peak_563	26	.	2.7819	4.58445	2.62542	364
chr1	73140450	73140877	ATACpk_peak_564	94	.	4.58195	11.7822	9.48674	231
chr1	73140505	73140877	ATACpk_peak_564	94	.	4.58195	11.7822	9.48674	231
chr1	73140450	73140877	ATACpk_peak_564	94	.	4.58195	11.7822	9.48674	231
chr1	74206097	74206614	ATACpk_peak_565	54	.	3.6001	7.57567	5.43791	699
chr1	74206097	74206898	ATACpk_peak_565	54	.	3.6001	7.57567	5.43791	699
chr1	74236122	74237339	ATACpk_peak_566	685	.	14.0731	71.6466	68.5529	500
chr1	74236122	74237330	ATACpk_peak_566	685	.	14.0731	71.6466	68.5529	500
chr1	74236122	74237543	ATACpk_peak_566	685	.	14.0731	71.6466	68.5529	500
chr1	74274875	74275231	ATACpk_peak_567	36	.	3.10918	5.71735	3.67934	142
chr1	74275269	74275658	ATACpk_peak_567	36	.	3.10918	5.71735	3.67934	142
chr1	74277202	74278222	ATACpk_peak_568	54	.	3.6001	7.57567	5.43791	534
chr1	74277202	74278222	ATACpk_peak_568	54	.	3.6001	7.57567	5.43791	534
chr1	74277202	74278222	ATACpk_peak_568	54	.	3.6001	7.57567	5.43791	534
chr1	74278735	74282465	ATACpk_peak_569	2376	.	33.3828	241.797	237.654	6050
chr1	74278735	74285552	ATACpk_peak_569	2376	.	33.3828	241.797	237.654	6050
chr1	74282894	74285552	ATACpk_peak_569	2376	.	33.3828	241.797	237.654	6050
chr1	74278735	74285552	ATACpk_peak_569	2376	.	33.3828	241.797	237.654	6050
chr1	74303680	74304307	ATACpk_peak_570	141	.	5.5638	16.5326	14.1119	369
chr1	74303680	74304307	ATACpk_peak_570	141	.	5.5638	16.5326	14.1119	369
chr1	74303680	74304307	ATACpk_peak_570	141	.	5.5638	16.5326	14.1119	369
chr1	74331839	74333339	ATACpk_peak_571	1004	.	18.1642	103.802	100.452	666
chr1	74331839	74333314	ATACpk_peak_571	1004	.	18.1642	103.802	100.452	666
chr1	74331839	74333423	ATACpk_peak_571	1004	.	18.1642	103.802	100.452	666
chr1	74340545	74341166	ATACpk_peak_572	133	.	5.40015	15.7075	13.306	535
chr1	74340545	74341166	ATACpk_peak_572	133	.	5.40015	15.7075	13.306	535
chr1	74340545	74341166	ATACpk_peak_572	133	.	5.40015	15.7075	13.306	535
chr1	74362556	74363248	ATACpk_peak_574	42	.	3.27282	6.31656	4.24321	473
chr1	74362556	74362752	ATACpk_peak_574	42	.	3.27282	6.31656	4.24321	473
chr1	74362556	74363248	ATACpk_peak_574	42	.	3.27282	6.31656	4.24321	473
chr1	74386509	74387862	ATACpk_peak_575	228	.	7.20021	25.418	22.83	708
chr1	74386608	74388022	ATACpk_peak_575	228	.	7.20021	25.418	22.83	708
chr1	74386499	74387987	ATACpk_peak_575	228	.	7.20021	25.418	22.83	708
chr1	74390775	74393145	ATACpk_peak_576	430	.	10.473	45.9435	43.0924	1213
chr1	74390775	74393145	ATACpk_peak_576	430	.	10.473	45.9435	43.0924	1213
chr1	74390775	74393145	ATACpk_peak_576	430	.	10.473	45.9435	43.0924	1213
chr1	74393800	74394263	ATACpk_peak_577	31	.	2.94554	5.13962	3.13965	284
chr1	74393800	74394263	ATACpk_peak_577	31	.	2.94554	5.13962	3.13965	284
chr1	74395202	74395553	ATACpk_peak_578	21	.	2.61826	4.05299	2.13804	233
chr1	74396596	74398313	ATACpk_peak_579	266	.	7.85477	29.2578	26.6125	881
chr1	74396596	74398193	ATACpk_peak_579	266	.	7.85477	29.2578	26.6125	881
chr1	74396706	74398210	ATACpk_peak_579	266	.	7.85477	29.2578	26.6125	881
chr1	74411005	74411377	ATACpk_peak_580	60	.	3.76374	8.23385	6.06661	69
chr1	74411005	74411377	ATACpk_peak_580	60	.	3.76374	8.23385	6.06661	69
chr1	74411005	74411377	ATACpk_peak_580	60	.	3.76374	8.23385	6.06661	69
chr1	74505268	74507058	ATACpk_peak_581	2030	.	29.7827	207.081	203.077	723
chr1	74505217	74507044	ATACpk_peak_581	2030	.	29.7827	207.081	203.077	723
chr1	74505217	74507167	ATACpk_peak_581	2030	.	29.7827	207.081	203.077	723
chr1	74541230	74543840	ATACpk_peak_582	125	.	5.23651	14.8952	12.5135	962
chr1	74541230	74543728	ATACpk_peak_582	125	.	5.23651	14.8952	12.5135	962
chr1	74541230	74543840	ATACpk_peak_582	125	.	5.23651	14.8952	12.5135	962
chr1	74587429	74589365	ATACpk_peak_583	1831	.	27.6553	187.1	183.197	1118
chr1	74587357	74589365	ATACpk_peak_583	1831	.	27.6553	187.1	183.197	1118
chr1	74587234	74589365	ATACpk_peak_583	1831	.	27.6553	187.1	183.197	1118
chr1	74600662	74601902	ATACpk_peak_584	387	.	9.81846	41.5919	38.7886	706
chr1	74600662	74601917	ATACpk_peak_584	387	.	9.81846	41.5919	38.7886	706
chr1	74600662	74601917	ATACpk_peak_584	387	.	9.81846	41.5919	38.7886	706
chr1	74647593	74648534	ATACpk_peak_585	125	.	5.23651	14.8952	12.5135	830
chr1	74647633	74648534	ATACpk_peak_585	125	.	5.23651	14.8952	12.5135	830
chr1	74647631	74648534	ATACpk_peak_585	125	.	5.23651	14.8952	12.5135	830
chr1	74661352	74662908	ATACpk_peak_586	1221	.	20.7824	125.701	122.185	399
chr1	74661352	74662752	ATACpk_peak_586	1221	.	20.7824	125.701	122.185	399
chr1	74661352	74662910	ATACpk_peak_586	1221	.	20.7824	125.701	122.185	399
chr1	74713498	74713876	ATACpk_peak_587	26	.	2.7819	4.58445	2.62542	14
chr1	74713498	74713876	ATACpk_peak_587	26	.	2.7819	4.58445	2.62542	14
chr1	74713498	74713876	ATACpk_peak_587	26	.	2.7819	4.58445	2.62542	14
chr1	74783650	74784646	ATACpk_peak_588	183	.	6.382	20.8386	18.3291	655
chr1	74783650	74784684	ATACpk_peak_588	183	.	6.382	20.8386	18.3291	655
chr1	74783650	74784684	ATACpk_peak_588	183	.	6.382	20.8386	18.3291	655
chr1	74791471	74791985	ATACpk_peak_590	157	.	5.89108	18.2199	15.7621	230
chr1	74791529	74791985	ATACpk_peak_590	157	.	5.89108	18.2199	15.7621	230
chr1	74791471	74791985	ATACpk_peak_590	157	.	5.89108	18.2199	15.7621	230
chr1	74806497	74808204	ATACpk_peak_591	237	.	7.36385	26.3639	23.7612	488
chr1	74806497	74808204	ATACpk_peak_591	237	.	7.36385	26.3639	23.7612	488
chr1	74806497	74808204	ATACpk_peak_591	237	.	7.36385	26.3639	23.7612	488
chr1	74816598	74817262	ATACpk_peak_592	228	.	7.20021	25.418	22.83	749
chr1	74816927	74817266	ATACpk_peak_592	228	.	7.20021	25.418	22.83	749
chr1	74816560	74817259	ATACpk_peak_592	228	.	7.20021	25.418	22.83	749
chr1	74854390	74855462	ATACpk_peak_593	256	.	7.69113	28.284	25.6527	811
chr1	74854169	74855299	ATACpk_peak_593	256	.	7.69113	28.284	25.6527	811
chr1	74854202	74855555	ATACpk_peak_593	256	.	7.69113	28.284	25.6527	811
chr1	74857544	74858515	ATACpk_peak_594	109	.	4.90923	13.3106	10.9706	727
chr1	74858159	74858684	ATACpk_peak_594	109	.	4.90923	13.3106	10.9706	727
chr1	74857538	74858714	ATACpk_peak_594	109	.	4.90923	13.3106	10.9706	727
chr1	74897550	74898305	ATACpk_peak_596	73	.	4.09103	9.60366	7.38177	565
chr1	74897608	74898305	ATACpk_peak_596	73	.	4.09103	9.60366	7.38177	565
chr1	74897550	74898305	ATACpk_peak_596	73	.	4.09103	9.60366	7.38177	565
chr1	74898619	74899628	ATACpk_peak_597	73	.	4.09103	9.60366	7.38177	225
chr1	74898619	74899628	ATACpk_peak_597	73	.	4.09103	9.60366	7.38177	225
chr1	74898619	74899628	ATACpk_peak_597	73	.	4.09103	9.60366	7.38177	225
chr1	74899948	74901763	ATACpk_peak_598	200	.	6.70928	22.6394	20.0973	941
chr1	74899948	74901763	ATACpk_peak_598	200	.	6.70928	22.6394	20.0973	941
chr1	74899948	74901763	ATACpk_peak_598	200	.	6.70928	22.6394	20.0973	941
chr1	74904386	74904683	ATACpk_peak_599	21	.	2.61826	4.05299	2.13804	1
chr1	74913437	74915029	ATACpk_peak_601	67	.	3.92739	8.91008	6.7148	572
chr1	74913843	74915029	ATACpk_peak_601	67	.	3.92739	8.91008	6.7148	572
chr1	74913437	74914503	ATACpk_peak_601	67	.	3.92739	8.91008	6.7148	572
chr1	74914824	74915029	ATACpk_peak_601	67	.	3.92739	8.91008	6.7148	572
chr1	74915872	74919229	ATACpk_peak_602	73	.	4.09103	9.60366	7.38177	1374
chr1	74915872	74917003	ATACpk_peak_602	73	.	4.09103	9.60366	7.38177	1374
chr1	74917764	74919229	ATACpk_peak_602	73	.	4.09103	9.60366	7.38177	1374
chr1	74915872	74919229	ATACpk_peak_602	73	.	4.09103	9.60366	7.38177	1374
chr1	74920131	74920537	ATACpk_peak_603	54	.	3.6001	7.57567	5.43791	303
chr1	74920131	74920537	ATACpk_peak_603	54	.	3.6001	7.57567	5.43791	303
chr1	74920131	74920537	ATACpk_peak_603	54	.	3.6001	7.57567	5.43791	303
chr1	74922486	74922840	ATACpk_peak_604	36	.	3.10918	5.71735	3.67934	34
chr1	74922486	74922840	ATACpk_peak_604	36	.	3.10918	5.71735	3.67934	34
chr1	74922486	74922738	ATACpk_peak_604	36	.	3.10918	5.71735	3.67934	34
chr1	74924941	74926554	ATACpk_peak_605	125	.	5.23651	14.8952	12.5135	1415
chr1	74924983	74926554	ATACpk_peak_605	125	.	5.23651	14.8952	12.5135	1415
chr1	74924598	74926554	ATACpk_peak_605	125	.	5.23651	14.8952	12.5135	1415
chr1	74927030	74928267	ATACpk_peak_606	31	.	2.94554	5.13962	3.13965	499
chr1	74927030	74928267	ATACpk_peak_606	31	.	2.94554	5.13962	3.13965	499
chr1	74927030	74928267	ATACpk_peak_606	31	.	2.94554	5.13962	3.13965	499
chr1	74932694	74933262	ATACpk_peak_607	36	.	3.10918	5.71735	3.67934	110
chr1	74932659	74933159	ATACpk_peak_607	36	.	3.10918	5.71735	3.67934	110
chr1	74935341	74936327	ATACpk_peak_608	117	.	5.07287	14.0961	11.7349	250
chr1	74935341	74936327	ATACpk_peak_608	117	.	5.07287	14.0961	11.7349	250
chr1	74935341	74936327	ATACpk_peak_608	117	.	5.07287	14.0961	11.7349	250
chr1	74948660	74952334	ATACpk_peak_609	141	.	5.5638	16.5326	14.1119	2375
chr1	74948754	74952319	ATACpk_peak_609	141	.	5.5638	16.5326	14.1119	2375
chr1	74948660	74952044	ATACpk_peak_609	141	.	5.5638	16.5326	14.1119	2375
chr1	75124272	75125485	ATACpk_peak_610	722	.	14.5641	75.3554	72.2308	721
chr1	75124272	75125485	ATACpk_peak_610	722	.	14.5641	75.3554	72.2308	721
chr1	75124272	75125485	ATACpk_peak_610	722	.	14.5641	75.3554	72.2308	721
chr1	75141021	75143395	ATACpk_peak_611	649	.	13.5822	67.983	64.9207	1636
chr1	75141021	75143395	ATACpk_peak_611	649	.	13.5822	67.983	64.9207	1636
chr1	75141021	75143395	ATACpk_peak_611	649	.	13.5822	67.983	64.9207	1636
chr1	75145920	75147590	ATACpk_peak_612	60	.	3.76374	8.23385	6.06661	790
chr1	75145920	75147431	ATACpk_peak_612	60	.	3.76374	8.23385	6.06661	790
chr1	75146063	75147958	ATACpk_peak_612	60	.	3.76374	8.23385	6.06661	790
chr1	75167895	75169403	ATACpk_peak_613	685	.	14.0731	71.6466	68.5529	726
chr1	75167995	75169440	ATACpk_peak_613	685	.	14.0731	71.6466	68.5529	726
chr1	75167891	75169440	ATACpk_peak_613	685	.	14.0731	71.6466	68.5529	726
chr1	75179749	75181743	ATACpk_peak_614	601	.	12.9276	63.1711	60.1517	610
chr1	75179749	75181378	ATACpk_peak_614	601	.	12.9276	63.1711	60.1517	610
chr1	75179749	75181743	ATACpk_peak_614	601	.	12.9276	63.1711	60.1517	610
chr1	75184767	75184912	ATACpk_peak_615	21	.	2.61826	4.05299	2.13804	257
chr1	75184767	75185122	ATACpk_peak_615	21	.	2.61826	4.05299	2.13804	257
chr1	75191001	75193391	ATACpk_peak_616	991	.	18.0005	102.465	99.1257	794
chr1	75191001	75193430	ATACpk_peak_616	991	.	18.0005	102.465	99.1257	794
chr1	75191001	75193654	ATACpk_peak_616	991	.	18.0005	102.465	99.1257	794
chr1	75195539	75195849	ATACpk_peak_618	26	.	2.7819	4.58445	2.62542	58
chr1	75195730	75195849	ATACpk_peak_618	26	.	2.7819	4.58445	2.62542	58
chr1	75209921	75211620	ATACpk_peak_619	797	.	15.5459	82.9025	79.7165	938
chr1	75210277	75211493	ATACpk_peak_619	797	.	15.5459	82.9025	79.7165	938
chr1	75209984	75211565	ATACpk_peak_619	797	.	15.5459	82.9025	79.7165	938
chr1	75215912	75217503	ATACpk_peak_620	174	.	6.21836	19.9544	17.4617	3030
chr1	75215849	75216565	ATACpk_peak_620	174	.	6.21836	19.9544	17.4617	3030
chr1	75217981	75219774	ATACpk_peak_620	174	.	6.21836	19.9544	17.4617	3030
chr1	75217656	75219774	ATACpk_peak_620	174	.	6.21836	19.9544	17.4617	3030
chr1	75215849	75219774	ATACpk_peak_620	174	.	6.21836	19.9544	17.4617	3030
chr1	75230881	75234155	ATACpk_peak_621	166	.	6.05472	19.0814	16.6059	1168
chr1	75231162	75234155	ATACpk_peak_621	166	.	6.05472	19.0814	16.6059	1168
chr1	75230881	75234155	ATACpk_peak_621	166	.	6.05472	19.0814	16.6059	1168
chr1	75234754	75237380	ATACpk_peak_622	1194	.	20.4551	122.914	119.419	1739
chr1	75234754	75237380	ATACpk_peak_622	1194	.	20.4551	122.914	119.419	1739
chr1	75234754	75237380	ATACpk_peak_622	1194	.	20.4551	122.914	119.419	1739
chr1	75243819	75243989	ATACpk_peak_623	42	.	3.27282	6.31656	4.24321	484
chr1	75244470	75244627	ATACpk_peak_623	42	.	3.27282	6.31656	4.24321	484
chr1	75243819	75244627	ATACpk_peak_623	42	.	3.27282	6.31656	4.24321	484
chr1	75243819	75244627	ATACpk_peak_623	42	.	3.27282	6.31656	4.24321	484
chr1	75244906	75245083	ATACpk_peak_624	94	.	4.58195	11.7822	9.48674	3327
chr1	75245574	75248410	ATACpk_peak_624	94	.	4.58195	11.7822	9.48674	3327
chr1	75244906	75248698	ATACpk_peak_624	94	.	4.58195	11.7822	9.48674	3327
chr1	75244906	75248698	ATACpk_peak_624	94	.	4.58195	11.7822	9.48674	3327
chr1	75251351	75255001	ATACpk_peak_625	157	.	5.89108	18.2199	15.7621	2634
chr1	75251356	75255001	ATACpk_peak_625	157	.	5.89108	18.2199	15.7621	2634
chr1	75251351	75255001	ATACpk_peak_625	157	.	5.89108	18.2199	15.7621	2634
chr1	75263222	75263428	ATACpk_peak_626	42	.	3.27282	6.31656	4.24321	184
chr1	75263222	75263423	ATACpk_peak_626	42	.	3.27282	6.31656	4.24321	184
chr1	75263222	75263591	ATACpk_peak_626	42	.	3.27282	6.31656	4.24321	184
chr1	75316848	75318534	ATACpk_peak_627	2424	.	33.8737	246.613	242.454	851
chr1	75316848	75318534	ATACpk_peak_627	2424	.	33.8737	246.613	242.454	851
chr1	75316848	75318534	ATACpk_peak_627	2424	.	33.8737	246.613	242.454	851
chr1	75360489	75360995	ATACpk_peak_628	94	.	4.58195	11.7822	9.48674	314
chr1	75360489	75360876	ATACpk_peak_628	94	.	4.58195	11.7822	9.48674	314
chr1	75360489	75360995	ATACpk_peak_628	94	.	4.58195	11.7822	9.48674	314
chr1	75369534	75369829	ATACpk_peak_629	87	.	4.41831	11.0403	8.76842	67
chr1	75369534	75369829	ATACpk_peak_629	87	.	4.41831	11.0403	8.76842	67
chr1	75369534	75369829	ATACpk_peak_629	87	.	4.41831	11.0403	8.76842	67
chr1	75375318	75375595	ATACpk_peak_630	31	.	2.94554	5.13962	3.13965	340
chr1	75375435	75375660	ATACpk_peak_630	31	.	2.94554	5.13962	3.13965	340
chr1	75435545	75436172	ATACpk_peak_631	54	.	3.6001	7.57567	5.43791	452
chr1	75435545	75436172	ATACpk_peak_631	54	.	3.6001	7.57567	5.43791	452
chr1	75435545	75436172	ATACpk_peak_631	54	.	3.6001	7.57567	5.43791	452
chr1	75445834	75446209	ATACpk_peak_632	102	.	4.74559	12.5391	10.2211	135
chr1	75445834	75446209	ATACpk_peak_632	102	.	4.74559	12.5391	10.2211	135
chr1	75445834	75446209	ATACpk_peak_632	102	.	4.74559	12.5391	10.2211	135
chr1	75460810	75462671	ATACpk_peak_633	295	.	8.34569	32.2319	29.5452	247
chr1	75460810	75462681	ATACpk_peak_633	295	.	8.34569	32.2319	29.5452	247
chr1	75460810	75462671	ATACpk_peak_633	295	.	8.34569	32.2319	29.5452	247
chr1	75475895	75476697	ATACpk_peak_634	73	.	4.09103	9.60366	7.38177	664
chr1	75475742	75476707	ATACpk_peak_634	73	.	4.09103	9.60366	7.38177	664
chr1	75475772	75476697	ATACpk_peak_634	73	.	4.09103	9.60366	7.38177	664
chr1	75478657	75480021	ATACpk_peak_635	1505	.	24.0552	154.292	150.576	1058
chr1	75478685	75480134	ATACpk_peak_635	1505	.	24.0552	154.292	150.576	1058
chr1	75478690	75480134	ATACpk_peak_635	1505	.	24.0552	154.292	150.576	1058
chr1	75487608	75488106	ATACpk_peak_636	60	.	3.76374	8.23385	6.06661	699
chr1	75487340	75488070	ATACpk_peak_636	60	.	3.76374	8.23385	6.06661	699
chr1	75487340	75488062	ATACpk_peak_636	60	.	3.76374	8.23385	6.06661	699
chr1	75503292	75503870	ATACpk_peak_637	80	.	4.25467	10.3139	8.06645	339
chr1	75503272	75503870	ATACpk_peak_637	80	.	4.25467	10.3139	8.06645	339
chr1	75503381	75503870	ATACpk_peak_637	80	.	4.25467	10.3139	8.06645	339
chr1	75505180	75506569	ATACpk_peak_638	174	.	6.21836	19.9544	17.4617	760
chr1	75505203	75506569	ATACpk_peak_638	174	.	6.21836	19.9544	17.4617	760
chr1	75505203	75506569	ATACpk_peak_638	174	.	6.21836	19.9544	17.4617	760
chr1	75521140	75522024	ATACpk_peak_639	625	.	13.2549	65.5664	62.5256	420
chr1	75521140	75522027	ATACpk_peak_639	625	.	13.2549	65.5664	62.5256	420
chr1	75521140	75522027	ATACpk_peak_639	625	.	13.2549	65.5664	62.5256	420
chr1	75559300	75560473	ATACpk_peak_640	228	.	7.20021	25.418	22.83	575
chr1	75559129	75560013	ATACpk_peak_640	228	.	7.20021	25.418	22.83	575
chr1	75559129	75560473	ATACpk_peak_640	228	.	7.20021	25.418	22.83	575
chr1	75713645	75715351	ATACpk_peak_641	325	.	8.83662	35.2817	32.5555	897
chr1	75713708	75715348	ATACpk_peak_641	325	.	8.83662	35.2817	32.5555	897
chr1	75713756	75715330	ATACpk_peak_641	325	.	8.83662	35.2817	32.5555	897
chr1	76240268	76240580	ATACpk_peak_642	149	.	5.72744	17.3702	14.9306	74
chr1	76240263	76240580	ATACpk_peak_642	149	.	5.72744	17.3702	14.9306	74
chr1	76240248	76240580	ATACpk_peak_642	149	.	5.72744	17.3702	14.9306	74
chr1	76570425	76570731	ATACpk_peak_643	67	.	3.92739	8.91008	6.7148	140
chr1	76570470	76570731	ATACpk_peak_643	67	.	3.92739	8.91008	6.7148	140
chr1	76570425	76570731	ATACpk_peak_643	67	.	3.92739	8.91008	6.7148	140
chr1	77975937	77976249	ATACpk_peak_645	149	.	5.72744	17.3702	14.9306	213
chr1	77975937	77976249	ATACpk_peak_645	149	.	5.72744	17.3702	14.9306	213
chr1	78309813	78311345	ATACpk_peak_646	601	.	12.9276	63.1711	60.1517	509
chr1	78309813	78311345	ATACpk_peak_646	601	.	12.9276	63.1711	60.1517	509
chr1	78309813	78311345	ATACpk_peak_646	601	.	12.9276	63.1711	60.1517	509
chr1	78488274	78489537	ATACpk_peak_647	420	.	10.3094	44.8453	42.0059	553
chr1	78488274	78489548	ATACpk_peak_647	420	.	10.3094	44.8453	42.0059	553
chr1	78488274	78489546	ATACpk_peak_647	420	.	10.3094	44.8453	42.0059	553
chr1	78588206	78588821	ATACpk_peak_649	80	.	4.25467	10.3139	8.06645	477
chr1	78588240	78588821	ATACpk_peak_649	80	.	4.25467	10.3139	8.06645	477
chr1	78588206	78588821	ATACpk_peak_649	80	.	4.25467	10.3139	8.06645	477
chr1	78657111	78658840	ATACpk_peak_650	1741	.	26.6735	178.022	174.168	751
chr1	78657111	78658941	ATACpk_peak_650	1741	.	26.6735	178.022	174.168	751
chr1	78657111	78659012	ATACpk_peak_650	1741	.	26.6735	178.022	174.168	751
chr1	78695433	78695833	ATACpk_peak_651	54	.	3.6001	7.57567	5.43791	259
chr1	78785180	78786174	ATACpk_peak_652	305	.	8.50933	33.2403	30.5403	899
chr1	78785180	78786174	ATACpk_peak_652	305	.	8.50933	33.2403	30.5403	899
chr1	78785180	78786174	ATACpk_peak_652	305	.	8.50933	33.2403	30.5403	899
chr1	79671738	79672217	ATACpk_peak_654	48	.	3.43646	6.9363	4.82981	316
chr1	79671684	79672212	ATACpk_peak_654	48	.	3.43646	6.9363	4.82981	316
chr1	79760797	79762133	ATACpk_peak_655	295	.	8.34569	32.2319	29.5452	945
chr1	79760886	79762181	ATACpk_peak_655	295	.	8.34569	32.2319	29.5452	945
chr1	79760764	79762181	ATACpk_peak_655	295	.	8.34569	32.2319	29.5452	945
chr1	79775625	79776426	ATACpk_peak_656	149	.	5.72744	17.3702	14.9306	401
chr1	79775690	79776344	ATACpk_peak_656	149	.	5.72744	17.3702	14.9306	401
chr1	79775625	79776426	ATACpk_peak_656	149	.	5.72744	17.3702	14.9306	401
chr1	80218270	80218563	ATACpk_peak_657	80	.	4.25467	10.3139	8.06645	202
chr1	80218270	80218568	ATACpk_peak_657	80	.	4.25467	10.3139	8.06645	202
chr1	80218270	80218568	ATACpk_peak_657	80	.	4.25467	10.3139	8.06645	202
chr1	80339731	80341383	ATACpk_peak_659	589	.	12.764	61.9816	58.9732	1288
chr1	80339731	80341424	ATACpk_peak_659	589	.	12.764	61.9816	58.9732	1288
chr1	80339731	80341424	ATACpk_peak_659	589	.	12.764	61.9816	58.9732	1288
chr1	81691870	81693419	ATACpk_peak_661	149	.	5.72744	17.3702	14.9306	1560
chr1	81691817	81693432	ATACpk_peak_661	149	.	5.72744	17.3702	14.9306	1560
chr1	81691817	81693416	ATACpk_peak_661	149	.	5.72744	17.3702	14.9306	1560
chr1	81709782	81710816	ATACpk_peak_662	166	.	6.05472	19.0814	16.6059	95
chr1	81709782	81710816	ATACpk_peak_662	166	.	6.05472	19.0814	16.6059	95
chr1	81709782	81710816	ATACpk_peak_662	166	.	6.05472	19.0814	16.6059	95
chr1	82283226	82283656	ATACpk_peak_663	409	.	10.1457	43.7538	40.9264	511
chr1	82283073	82283656	ATACpk_peak_663	409	.	10.1457	43.7538	40.9264	511
chr1	82282922	82283656	ATACpk_peak_663	409	.	10.1457	43.7538	40.9264	511
chr1	82316075	82317049	ATACpk_peak_664	554	.	12.2731	58.4465	55.4716	569
chr1	82316158	82317071	ATACpk_peak_664	554	.	12.2731	58.4465	55.4716	569
chr1	82316075	82317081	ATACpk_peak_664	554	.	12.2731	58.4465	55.4716	569
chr1	82477542	82477977	ATACpk_peak_665	67	.	3.92739	8.91008	6.7148	288
chr1	82477542	82477977	ATACpk_peak_665	67	.	3.92739	8.91008	6.7148	288
chr1	82477542	82477975	ATACpk_peak_665	67	.	3.92739	8.91008	6.7148	288
chr1	82634747	82635714	ATACpk_peak_666	54	.	3.6001	7.57567	5.43791	834
chr1	82635213	82635714	ATACpk_peak_666	54	.	3.6001	7.57567	5.43791	834
chr1	82634747	82635714	ATACpk_peak_666	54	.	3.6001	7.57567	5.43791	834
chr1	82724398	82725653	ATACpk_peak_667	475	.	11.1276	50.4027	47.5056	604
chr1	82724277	82725653	ATACpk_peak_667	475	.	11.1276	50.4027	47.5056	604
chr1	82724275	82725651	ATACpk_peak_667	475	.	11.1276	50.4027	47.5056	604
chr1	82790067	82790503	ATACpk_peak_668	31	.	2.94554	5.13962	3.13965	208
chr1	82790067	82790539	ATACpk_peak_668	31	.	2.94554	5.13962	3.13965	208
chr1	82790067	82790491	ATACpk_peak_668	31	.	2.94554	5.13962	3.13965	208
chr1	82830413	82830878	ATACpk_peak_669	60	.	3.76374	8.23385	6.06661	375
chr1	82830481	82830878	ATACpk_peak_669	60	.	3.76374	8.23385	6.06661	375
chr1	82838521	82840240	ATACpk_peak_670	566	.	12.4367	59.6192	56.6332	1051
chr1	82838708	82840240	ATACpk_peak_670	566	.	12.4367	59.6192	56.6332	1051
chr1	82838521	82840240	ATACpk_peak_670	566	.	12.4367	59.6192	56.6332	1051
chr1	82914140	82914292	ATACpk_peak_671	31	.	2.94554	5.13962	3.13965	198
chr1	83093480	83093534	ATACpk_peak_673	42	.	3.27282	6.31656	4.24321	241
chr1	83093202	83093534	ATACpk_peak_673	42	.	3.27282	6.31656	4.24321	241
chr1	83138002	83138991	ATACpk_peak_674	133	.	5.40015	15.7075	13.306	94
chr1	83138002	83138981	ATACpk_peak_674	133	.	5.40015	15.7075	13.306	94
chr1	83138002	83138991	ATACpk_peak_674	133	.	5.40015	15.7075	13.306	94
chr1	83159674	83160012	ATACpk_peak_675	209	.	6.87292	23.5555	20.9978	108
chr1	83159680	83160002	ATACpk_peak_675	209	.	6.87292	23.5555	20.9978	108
chr1	83159674	83160012	ATACpk_peak_675	209	.	6.87292	23.5555	20.9978	108
chr1	83276511	83277745	ATACpk_peak_676	109	.	4.90923	13.3106	10.9706	832
chr1	83276511	83277933	ATACpk_peak_676	109	.	4.90923	13.3106	10.9706	832
chr1	83276511	83277933	ATACpk_peak_676	109	.	4.90923	13.3106	10.9706	832
chr1	83999573	84000534	ATACpk_peak_677	174	.	6.21836	19.9544	17.4617	121
chr1	83999573	84000602	ATACpk_peak_677	174	.	6.21836	19.9544	17.4617	121
chr1	83999573	84000641	ATACpk_peak_677	174	.	6.21836	19.9544	17.4617	121
chr1	84225784	84226934	ATACpk_peak_678	335	.	9.00026	36.3143	33.5752	528
chr1	84225784	84226940	ATACpk_peak_678	335	.	9.00026	36.3143	33.5752	528
chr1	84225784	84226940	ATACpk_peak_678	335	.	9.00026	36.3143	33.5752	528
chr1	84263641	84264486	ATACpk_peak_679	54	.	3.6001	7.57567	5.43791	336
chr1	84263650	84264582	ATACpk_peak_679	54	.	3.6001	7.57567	5.43791	336
chr1	84263629	84264582	ATACpk_peak_679	54	.	3.6001	7.57567	5.43791	336
chr1	84709961	84710294	ATACpk_peak_680	26	.	2.7819	4.58445	2.62542	479
chr1	84709926	84710482	ATACpk_peak_680	26	.	2.7819	4.58445	2.62542	479
chr1	84837223	84840636	ATACpk_peak_683	1305	.	21.7643	134.145	130.566	2255
chr1	84837223	84840636	ATACpk_peak_683	1305	.	21.7643	134.145	130.566	2255
chr1	84837223	84840636	ATACpk_peak_683	1305	.	21.7643	134.145	130.566	2255
chr1	84880985	84882320	ATACpk_peak_684	183	.	6.382	20.8386	18.3291	429
chr1	84880985	84882596	ATACpk_peak_684	183	.	6.382	20.8386	18.3291	429
chr1	84880985	84882392	ATACpk_peak_684	183	.	6.382	20.8386	18.3291	429
chr1	84933998	84934859	ATACpk_peak_685	117	.	5.07287	14.0961	11.7349	646
chr1	84934113	84934943	ATACpk_peak_685	117	.	5.07287	14.0961	11.7349	646
chr1	84933998	84935177	ATACpk_peak_685	117	.	5.07287	14.0961	11.7349	646
chr1	85703155	85704073	ATACpk_peak_816	497	.	11.4549	52.6706	49.7511	1018
chr1	85703267	85704073	ATACpk_peak_816	497	.	11.4549	52.6706	49.7511	1018
chr1	85702790	85704073	ATACpk_peak_816	497	.	11.4549	52.6706	49.7511	1018
chr1	85731445	85731905	ATACpk_peak_817	48	.	3.43646	6.9363	4.82981	188
chr1	85731445	85732019	ATACpk_peak_817	48	.	3.43646	6.9363	4.82981	188
chr1	85731445	85732019	ATACpk_peak_817	48	.	3.43646	6.9363	4.82981	188
chr1	85771078	85771339	ATACpk_peak_818	26	.	2.7819	4.58445	2.62542	175
chr1	85792860	85794437	ATACpk_peak_819	759	.	15.055	79.1078	75.9526	637
chr1	85792942	85794437	ATACpk_peak_819	759	.	15.055	79.1078	75.9526	637
chr1	85792860	85794437	ATACpk_peak_819	759	.	15.055	79.1078	75.9526	637
chr1	85820162	85822441	ATACpk_peak_820	520	.	11.7822	54.9631	52.0211	1385
chr1	85820297	85822441	ATACpk_peak_820	520	.	11.7822	54.9631	52.0211	1385
chr1	85820162	85822441	ATACpk_peak_820	520	.	11.7822	54.9631	52.0211	1385
chr1	85894814	85895384	ATACpk_peak_821	73	.	4.09103	9.60366	7.38177	92
chr1	85894546	85895356	ATACpk_peak_821	73	.	4.09103	9.60366	7.38177	92
chr1	85894466	85895384	ATACpk_peak_821	73	.	4.09103	9.60366	7.38177	92
chr1	85898555	85899869	ATACpk_peak_822	109	.	4.90923	13.3106	10.9706	924
chr1	85898555	85899857	ATACpk_peak_822	109	.	4.90923	13.3106	10.9706	924
chr1	85898555	85899894	ATACpk_peak_822	109	.	4.90923	13.3106	10.9706	924
chr1	85917260	85917642	ATACpk_peak_823	54	.	3.6001	7.57567	5.43791	66
chr1	85928088	85928998	ATACpk_peak_824	73	.	4.09103	9.60366	7.38177	394
chr1	85928420	85928998	ATACpk_peak_824	73	.	4.09103	9.60366	7.38177	394
chr1	85928251	85928998	ATACpk_peak_824	73	.	4.09103	9.60366	7.38177	394
chr1	85933804	85934262	ATACpk_peak_825	48	.	3.43646	6.9363	4.82981	178
chr1	85933804	85934262	ATACpk_peak_825	48	.	3.43646	6.9363	4.82981	178
chr1	85933804	85934262	ATACpk_peak_825	48	.	3.43646	6.9363	4.82981	178
chr1	86045763	86046989	ATACpk_peak_827	452	.	10.8003	48.1601	45.2856	263
chr1	86045763	86046989	ATACpk_peak_827	452	.	10.8003	48.1601	45.2856	263
chr1	86045763	86046989	ATACpk_peak_827	452	.	10.8003	48.1601	45.2856	263
chr1	86063817	86065492	ATACpk_peak_828	543	.	12.1094	57.2795	54.3155	932
chr1	86063593	86065695	ATACpk_peak_828	543	.	12.1094	57.2795	54.3155	932
chr1	86063635	86065953	ATACpk_peak_828	543	.	12.1094	57.2795	54.3155	932
chr1	86154025	86155127	ATACpk_peak_829	1017	.	18.3278	105.143	101.783	685
chr1	86154075	86155127	ATACpk_peak_829	1017	.	18.3278	105.143	101.783	685
chr1	86154020	86155127	ATACpk_peak_829	1017	.	18.3278	105.143	101.783	685
chr1	86188692	86189291	ATACpk_peak_830	60	.	3.76374	8.23385	6.06661	291
chr1	86188692	86189291	ATACpk_peak_830	60	.	3.76374	8.23385	6.06661	291
chr1	86188692	86189291	ATACpk_peak_830	60	.	3.76374	8.23385	6.06661	291
chr1	86303496	86304021	ATACpk_peak_831	60	.	3.76374	8.23385	6.06661	360
chr1	86303120	86303969	ATACpk_peak_831	60	.	3.76374	8.23385	6.06661	360
chr1	86303359	86304021	ATACpk_peak_831	60	.	3.76374	8.23385	6.06661	360
chr1	86358633	86360404	ATACpk_peak_832	1433	.	23.237	147.027	143.357	498
chr1	86358619	86360404	ATACpk_peak_832	1433	.	23.237	147.027	143.357	498
chr1	86358619	86360404	ATACpk_peak_832	1433	.	23.237	147.027	143.357	498
chr1	86420414	86420416	ATACpk_peak_833	54	.	3.6001	7.57567	5.43791	646
chr1	86420708	86421504	ATACpk_peak_833	54	.	3.6001	7.57567	5.43791	646
chr1	86420581	86421504	ATACpk_peak_833	54	.	3.6001	7.57567	5.43791	646
chr1	86420414	86421504	ATACpk_peak_833	54	.	3.6001	7.57567	5.43791	646
chr1	86433879	86435708	ATACpk_peak_834	809	.	15.7095	84.1765	80.9805	651
chr1	86433879	86435708	ATACpk_peak_834	809	.	15.7095	84.1765	80.9805	651
chr1	86433879	86435708	ATACpk_peak_834	809	.	15.7095	84.1765	80.9805	651
chr1	86439349	86442935	ATACpk_peak_835	346	.	9.1639	37.3548	34.6027	3171
chr1	86439202	86442935	ATACpk_peak_835	346	.	9.1639	37.3548	34.6027	3171
chr1	86439202	86442935	ATACpk_peak_835	346	.	9.1639	37.3548	34.6027	3171
chr1	86467065	86467977	ATACpk_peak_836	315	.	8.67298	34.257	31.5438	508
chr1	86467065	86468004	ATACpk_peak_836	315	.	8.67298	34.257	31.5438	508
chr1	86467065	86468165	ATACpk_peak_836	315	.	8.67298	34.257	31.5438	508
chr1	86470827	86470958	ATACpk_peak_837	36	.	3.10918	5.71735	3.67934	76
chr1	86470655	86470958	ATACpk_peak_837	36	.	3.10918	5.71735	3.67934	76
chr1	86472370	86472886	ATACpk_peak_838	26	.	2.7819	4.58445	2.62542	67
chr1	86472370	86472899	ATACpk_peak_838	26	.	2.7819	4.58445	2.62542	67
chr1	86486023	86488542	ATACpk_peak_839	1771	.	27.0008	181.038	177.167	1536
chr1	86486266	86488476	ATACpk_peak_839	1771	.	27.0008	181.038	177.167	1536
chr1	86486349	86488505	ATACpk_peak_839	1771	.	27.0008	181.038	177.167	1536
chr1	86492186	86492594	ATACpk_peak_840	31	.	2.94554	5.13962	3.13965	311
chr1	86492186	86492444	ATACpk_peak_840	31	.	2.94554	5.13962	3.13965	311
chr1	86492186	86492594	ATACpk_peak_840	31	.	2.94554	5.13962	3.13965	311
chr1	86501334	86501729	ATACpk_peak_841	54	.	3.6001	7.57567	5.43791	385
chr1	86501334	86501882	ATACpk_peak_841	54	.	3.6001	7.57567	5.43791	385
chr1	86501336	86501882	ATACpk_peak_841	54	.	3.6001	7.57567	5.43791	385
chr1	86502563	86505000	ATACpk_peak_842	1291	.	21.6006	132.729	129.161	1678
chr1	86502411	86505000	ATACpk_peak_842	1291	.	21.6006	132.729	129.161	1678
chr1	86502411	86505000	ATACpk_peak_842	1291	.	21.6006	132.729	129.161	1678
chr1	86523949	86529080	ATACpk_peak_843	1726	.	26.5098	176.519	172.672	1485
chr1	86523949	86529134	ATACpk_peak_843	1726	.	26.5098	176.519	172.672	1485
chr1	86523949	86529238	ATACpk_peak_843	1726	.	26.5098	176.519	172.672	1485
chr1	86531770	86532799	ATACpk_peak_844	94	.	4.58195	11.7822	9.48674	1323
chr1	86531614	86532799	ATACpk_peak_844	94	.	4.58195	11.7822	9.48674	1323
chr1	86531187	86532799	ATACpk_peak_844	94	.	4.58195	11.7822	9.48674	1323
chr1	86581398	86582946	ATACpk_peak_845	951	.	17.5096	98.4777	95.1695	1184
chr1	86581812	86582946	ATACpk_peak_845	951	.	17.5096	98.4777	95.1695	1184
chr1	86581770	86582946	ATACpk_peak_845	951	.	17.5096	98.4777	95.1695	1184
chr1	86586702	86587462	ATACpk_peak_846	125	.	5.23651	14.8952	12.5135	484
chr1	86586876	86587368	ATACpk_peak_846	125	.	5.23651	14.8952	12.5135	484
chr1	86586702	86587475	ATACpk_peak_846	125	.	5.23651	14.8952	12.5135	484
chr1	86703373	86704393	ATACpk_peak_847	601	.	12.9276	63.1711	60.1517	459
chr1	86703393	86704340	ATACpk_peak_847	601	.	12.9276	63.1711	60.1517	459
chr1	86703373	86704393	ATACpk_peak_847	601	.	12.9276	63.1711	60.1517	459
chr1	86892247	86892838	ATACpk_peak_848	80	.	4.25467	10.3139	8.06645	418
chr1	86892302	86892838	ATACpk_peak_848	80	.	4.25467	10.3139	8.06645	418
chr1	86892247	86892838	ATACpk_peak_848	80	.	4.25467	10.3139	8.06645	418
chr1	87080111	87080156	ATACpk_peak_851	26	.	2.7819	4.58445	2.62542	25
chr1	87080097	87080156	ATACpk_peak_851	26	.	2.7819	4.58445	2.62542	25
chr1	87087158	87087670	ATACpk_peak_852	73	.	4.09103	9.60366	7.38177	170
chr1	87087210	87087798	ATACpk_peak_852	73	.	4.09103	9.60366	7.38177	170
chr1	87087134	87087951	ATACpk_peak_852	73	.	4.09103	9.60366	7.38177	170
chr1	87098516	87099179	ATACpk_peak_853	335	.	9.00026	36.3143	33.5752	534
chr1	87098292	87099179	ATACpk_peak_853	335	.	9.00026	36.3143	33.5752	534
chr1	87098266	87099179	ATACpk_peak_853	335	.	9.00026	36.3143	33.5752	534
chr1	87148456	87150507	ATACpk_peak_854	860	.	16.3641	89.3171	86.0807	1209
chr1	87148814	87150370	ATACpk_peak_854	860	.	16.3641	89.3171	86.0807	1209
chr1	87148717	87150772	ATACpk_peak_854	860	.	16.3641	89.3171	86.0807	1209
chr1	87154072	87154941	ATACpk_peak_855	125	.	5.23651	14.8952	12.5135	571
chr1	87154072	87154890	ATACpk_peak_855	125	.	5.23651	14.8952	12.5135	571
chr1	87154072	87154941	ATACpk_peak_855	125	.	5.23651	14.8952	12.5135	571
chr1	87182912	87187633	ATACpk_peak_856	335	.	9.00026	36.3143	33.5752	3808
chr1	87182912	87187633	ATACpk_peak_856	335	.	9.00026	36.3143	33.5752	3808
chr1	87182912	87187633	ATACpk_peak_856	335	.	9.00026	36.3143	33.5752	3808
chr1	87213380	87214597	ATACpk_peak_858	772	.	15.2186	80.3681	77.2026	588
chr1	87213380	87214624	ATACpk_peak_858	772	.	15.2186	80.3681	77.2026	588
chr1	87213380	87214624	ATACpk_peak_858	772	.	15.2186	80.3681	77.2026	588
chr1	87257818	87259116	ATACpk_peak_859	133	.	5.40015	15.7075	13.306	794
chr1	87257818	87259116	ATACpk_peak_859	133	.	5.40015	15.7075	13.306	794
chr1	87257818	87259116	ATACpk_peak_859	133	.	5.40015	15.7075	13.306	794
chr1	87259564	87259669	ATACpk_peak_860	31	.	2.94554	5.13962	3.13965	135
chr1	87259564	87259859	ATACpk_peak_860	31	.	2.94554	5.13962	3.13965	135
chr1	87259564	87259841	ATACpk_peak_860	31	.	2.94554	5.13962	3.13965	135
chr1	87262955	87265453	ATACpk_peak_861	589	.	12.764	61.9816	58.9732	1285
chr1	87262955	87265284	ATACpk_peak_861	589	.	12.764	61.9816	58.9732	1285
chr1	87262955	87265453	ATACpk_peak_861	589	.	12.764	61.9816	58.9732	1285
chr1	87271250	87271523	ATACpk_peak_862	26	.	2.7819	4.58445	2.62542	261
chr1	87271250	87271576	ATACpk_peak_862	26	.	2.7819	4.58445	2.62542	261
chr1	87273462	87273867	ATACpk_peak_863	67	.	3.92739	8.91008	6.7148	1953
chr1	87274167	87274600	ATACpk_peak_863	67	.	3.92739	8.91008	6.7148	1953
chr1	87273149	87273700	ATACpk_peak_863	67	.	3.92739	8.91008	6.7148	1953
chr1	87272386	87274276	ATACpk_peak_863	67	.	3.92739	8.91008	6.7148	1953
chr1	87283003	87283365	ATACpk_peak_864	48	.	3.43646	6.9363	4.82981	706
chr1	87292615	87292947	ATACpk_peak_865	42	.	3.27282	6.31656	4.24321	342
chr1	87292615	87293026	ATACpk_peak_865	42	.	3.27282	6.31656	4.24321	342
chr1	87309410	87309546	ATACpk_peak_866	36	.	3.10918	5.71735	3.67934	203
chr1	87309214	87309546	ATACpk_peak_866	36	.	3.10918	5.71735	3.67934	203
chr1	87309214	87309546	ATACpk_peak_866	36	.	3.10918	5.71735	3.67934	203
chr1	87326493	87327670	ATACpk_peak_867	1004	.	18.1642	103.802	100.452	457
chr1	87326493	87327670	ATACpk_peak_867	1004	.	18.1642	103.802	100.452	457
chr1	87326493	87327670	ATACpk_peak_867	1004	.	18.1642	103.802	100.452	457
chr1	87509491	87510680	ATACpk_peak_868	166	.	6.05472	19.0814	16.6059	789
chr1	87509547	87510785	ATACpk_peak_868	166	.	6.05472	19.0814	16.6059	789
chr1	87509496	87510778	ATACpk_peak_868	166	.	6.05472	19.0814	16.6059	789
chr1	87550601	87551823	ATACpk_peak_869	183	.	6.382	20.8386	18.3291	377
chr1	87550601	87551887	ATACpk_peak_869	183	.	6.382	20.8386	18.3291	377
chr1	87550601	87552069	ATACpk_peak_869	183	.	6.382	20.8386	18.3291	377
chr1	87611774	87612228	ATACpk_peak_870	42	.	3.27282	6.31656	4.24321	28
chr1	87611785	87612228	ATACpk_peak_870	42	.	3.27282	6.31656	4.24321	28
chr1	87611774	87612228	ATACpk_peak_870	42	.	3.27282	6.31656	4.24321	28
chr1	87617570	87618335	ATACpk_peak_871	36	.	3.10918	5.71735	3.67934	549
chr1	87619726	87621234	ATACpk_peak_872	256	.	7.69113	28.284	25.6527	827
chr1	87619726	87621625	ATACpk_peak_872	256	.	7.69113	28.284	25.6527	827
chr1	87619726	87621698	ATACpk_peak_872	256	.	7.69113	28.284	25.6527	827
chr1	87659325	87659681	ATACpk_peak_873	21	.	2.61826	4.05299	2.13804	4
chr1	87755725	87756463	ATACpk_peak_874	409	.	10.1457	43.7538	40.9264	533
chr1	87755725	87756601	ATACpk_peak_874	409	.	10.1457	43.7538	40.9264	533
chr1	87755725	87756601	ATACpk_peak_874	409	.	10.1457	43.7538	40.9264	533
chr1	87772606	87773260	ATACpk_peak_875	315	.	8.67298	34.257	31.5438	320
chr1	87772642	87773260	ATACpk_peak_875	315	.	8.67298	34.257	31.5438	320
chr1	87772665	87773260	ATACpk_peak_875	315	.	8.67298	34.257	31.5438	320
chr1	87852571	87854438	ATACpk_peak_878	722	.	14.5641	75.3554	72.2308	677
chr1	87852571	87854438	ATACpk_peak_878	722	.	14.5641	75.3554	72.2308	677
chr1	87852571	87854438	ATACpk_peak_878	722	.	14.5641	75.3554	72.2308	677
chr1	87854835	87855063	ATACpk_peak_879	26	.	2.7819	4.58445	2.62542	304
chr1	87855373	87855428	ATACpk_peak_879	26	.	2.7819	4.58445	2.62542	304
chr1	87854835	87855311	ATACpk_peak_879	26	.	2.7819	4.58445	2.62542	304
chr1	88008020	88008648	ATACpk_peak_880	228	.	7.20021	25.418	22.83	484
chr1	88007871	88008648	ATACpk_peak_880	228	.	7.20021	25.418	22.83	484
chr1	88007861	88008648	ATACpk_peak_880	228	.	7.20021	25.418	22.83	484
chr1	88203735	88203862	ATACpk_peak_881	48	.	3.43646	6.9363	4.82981	89
chr1	88203735	88204125	ATACpk_peak_881	48	.	3.43646	6.9363	4.82981	89
chr1	88204882	88206098	ATACpk_peak_882	1098	.	19.3096	113.268	109.847	821
chr1	88204882	88206221	ATACpk_peak_882	1098	.	19.3096	113.268	109.847	821
chr1	88204882	88206367	ATACpk_peak_882	1098	.	19.3096	113.268	109.847	821
chr1	88489369	88490624	ATACpk_peak_899	48	.	3.43646	6.9363	4.82981	875
chr1	88489599	88490624	ATACpk_peak_899	48	.	3.43646	6.9363	4.82981	875
chr1	88489540	88490624	ATACpk_peak_899	48	.	3.43646	6.9363	4.82981	875
chr1	88562310	88562513	ATACpk_peak_900	21	.	2.61826	4.05299	2.13804	40
chr1	88700557	88702643	ATACpk_peak_901	387	.	9.81846	41.5919	38.7886	1417
chr1	88700557	88702643	ATACpk_peak_901	387	.	9.81846	41.5919	38.7886	1417
chr1	88700557	88702643	ATACpk_peak_901	387	.	9.81846	41.5919	38.7886	1417
chr1	88705335	88706584	ATACpk_peak_902	356	.	9.32754	38.4029	35.6377	686
chr1	88705619	88706637	ATACpk_peak_902	356	.	9.32754	38.4029	35.6377	686
chr1	88705300	88706470	ATACpk_peak_902	356	.	9.32754	38.4029	35.6377	686
chr1	89015964	89016280	ATACpk_peak_904	36	.	3.10918	5.71735	3.67934	130
chr1	89015964	89016280	ATACpk_peak_904	36	.	3.10918	5.71735	3.67934	130
chr1	89015964	89016280	ATACpk_peak_904	36	.	3.10918	5.71735	3.67934	130
chr1	89032549	89032932	ATACpk_peak_905	73	.	4.09103	9.60366	7.38177	232
chr1	89032549	89032812	ATACpk_peak_905	73	.	4.09103	9.60366	7.38177	232
chr1	89032549	89033149	ATACpk_peak_905	73	.	4.09103	9.60366	7.38177	232
chr1	89069852	89071006	ATACpk_peak_906	420	.	10.3094	44.8453	42.0059	423
chr1	89069852	89070985	ATACpk_peak_906	420	.	10.3094	44.8453	42.0059	423
chr1	89069852	89071006	ATACpk_peak_906	420	.	10.3094	44.8453	42.0059	423
chr1	89175958	89176227	ATACpk_peak_907	67	.	3.92739	8.91008	6.7148	224
chr1	89175958	89176485	ATACpk_peak_907	67	.	3.92739	8.91008	6.7148	224
chr1	89175958	89176501	ATACpk_peak_907	67	.	3.92739	8.91008	6.7148	224
chr1	89216869	89217352	ATACpk_peak_908	42	.	3.27282	6.31656	4.24321	129
chr1	89216895	89217382	ATACpk_peak_908	42	.	3.27282	6.31656	4.24321	129
chr1	89216869	89217376	ATACpk_peak_908	42	.	3.27282	6.31656	4.24321	129
chr1	89264717	89265799	ATACpk_peak_909	48	.	3.43646	6.9363	4.82981	346
chr1	89264717	89265240	ATACpk_peak_909	48	.	3.43646	6.9363	4.82981	346
chr1	89264717	89265895	ATACpk_peak_909	48	.	3.43646	6.9363	4.82981	346
chr1	89266631	89267455	ATACpk_peak_910	94	.	4.58195	11.7822	9.48674	407
chr1	89266631	89267390	ATACpk_peak_910	94	.	4.58195	11.7822	9.48674	407
chr1	89266631	89267411	ATACpk_peak_910	94	.	4.58195	11.7822	9.48674	407
chr1	89453811	89455772	ATACpk_peak_911	486	.	11.2912	51.5335	48.6251	835
chr1	89453811	89455917	ATACpk_peak_911	486	.	11.2912	51.5335	48.6251	835
chr1	89453811	89455939	ATACpk_peak_911	486	.	11.2912	51.5335	48.6251	835
chr1	89501997	89502071	ATACpk_peak_912	16	.	2.45462	3.54652	1.68009	243
chr1	89501729	89502071	ATACpk_peak_912	16	.	2.45462	3.54652	1.68009	243
chr1	89502581	89502769	ATACpk_peak_913	42	.	3.27282	6.31656	4.24321	257
chr1	89502581	89503229	ATACpk_peak_913	42	.	3.27282	6.31656	4.24321	257
chr1	89502581	89503229	ATACpk_peak_913	42	.	3.27282	6.31656	4.24321	257
chr1	89577042	89577493	ATACpk_peak_914	117	.	5.07287	14.0961	11.7349	190
chr1	89577232	89577536	ATACpk_peak_914	117	.	5.07287	14.0961	11.7349	190
chr1	89580056	89581587	ATACpk_peak_915	157	.	5.89108	18.2199	15.7621	301
chr1	89580056	89581654	ATACpk_peak_915	157	.	5.89108	18.2199	15.7621	301
chr1	89580056	89581654	ATACpk_peak_915	157	.	5.89108	18.2199	15.7621	301
chr1	89968194	89969146	ATACpk_peak_917	335	.	9.00026	36.3143	33.5752	426
chr1	89968111	89968757	ATACpk_peak_917	335	.	9.00026	36.3143	33.5752	426
chr1	89968111	89969146	ATACpk_peak_917	335	.	9.00026	36.3143	33.5752	426
chr1	90152796	90153652	ATACpk_peak_918	219	.	7.03657	24.4818	21.9087	658
chr1	90153188	90153868	ATACpk_peak_918	219	.	7.03657	24.4818	21.9087	658
chr1	90152796	90153868	ATACpk_peak_918	219	.	7.03657	24.4818	21.9087	658
chr1	90284945	90285976	ATACpk_peak_919	42	.	3.27282	6.31656	4.24321	441
chr1	90284919	90285934	ATACpk_peak_919	42	.	3.27282	6.31656	4.24321	441
chr1	90286546	90286821	ATACpk_peak_920	31	.	2.94554	5.13962	3.13965	29
chr1	90286546	90286791	ATACpk_peak_920	31	.	2.94554	5.13962	3.13965	29
chr1	90445802	90448709	ATACpk_peak_921	295	.	8.34569	32.2319	29.5452	1816
chr1	90445802	90448465	ATACpk_peak_921	295	.	8.34569	32.2319	29.5452	1816
chr1	90445802	90448677	ATACpk_peak_921	295	.	8.34569	32.2319	29.5452	1816
chr1	90603041	90603737	ATACpk_peak_922	430	.	10.473	45.9435	43.0924	355
chr1	90603041	90603737	ATACpk_peak_922	430	.	10.473	45.9435	43.0924	355
chr1	90603041	90603737	ATACpk_peak_922	430	.	10.473	45.9435	43.0924	355
chr1	90650618	90651500	ATACpk_peak_923	80	.	4.25467	10.3139	8.06645	432
chr1	90650613	90651500	ATACpk_peak_923	80	.	4.25467	10.3139	8.06645	432
chr1	90650613	90651500	ATACpk_peak_923	80	.	4.25467	10.3139	8.06645	432
chr1	90735087	90736622	ATACpk_peak_924	589	.	12.764	61.9816	58.9732	1047
chr1	90735124	90736622	ATACpk_peak_924	589	.	12.764	61.9816	58.9732	1047
chr1	90735062	90736622	ATACpk_peak_924	589	.	12.764	61.9816	58.9732	1047
chr1	90928230	90928453	ATACpk_peak_925	26	.	2.7819	4.58445	2.62542	154
chr1	90928113	90928453	ATACpk_peak_925	26	.	2.7819	4.58445	2.62542	154
chr1	90995339	90995703	ATACpk_peak_926	266	.	7.85477	29.2578	26.6125	286
chr1	90995339	90995703	ATACpk_peak_926	266	.	7.85477	29.2578	26.6125	286
chr1	90995342	90995703	ATACpk_peak_926	266	.	7.85477	29.2578	26.6125	286
chr1	90998472	90998942	ATACpk_peak_927	48	.	3.43646	6.9363	4.82981	112
chr1	90998472	90998942	ATACpk_peak_927	48	.	3.43646	6.9363	4.82981	112
chr1	90998472	90998942	ATACpk_peak_927	48	.	3.43646	6.9363	4.82981	112
chr1	91079228	91079297	ATACpk_peak_928	31	.	2.94554	5.13962	3.13965	49
chr1	91079228	91079973	ATACpk_peak_928	31	.	2.94554	5.13962	3.13965	49
chr1	91144085	91145549	ATACpk_peak_929	886	.	16.6914	91.9134	88.6565	1071
chr1	91144025	91145547	ATACpk_peak_929	886	.	16.6914	91.9134	88.6565	1071
chr1	91144058	91145549	ATACpk_peak_929	886	.	16.6914	91.9134	88.6565	1071
chr1	91249902	91251132	ATACpk_peak_930	847	.	16.2005	88.0253	84.7991	313
chr1	91249902	91251132	ATACpk_peak_930	847	.	16.2005	88.0253	84.7991	313
chr1	91249902	91251132	ATACpk_peak_930	847	.	16.2005	88.0253	84.7991	313
chr1	91297423	91299169	ATACpk_peak_931	1208	.	20.6188	124.306	120.8	931
chr1	91297387	91298928	ATACpk_peak_931	1208	.	20.6188	124.306	120.8	931
chr1	91297387	91299072	ATACpk_peak_931	1208	.	20.6188	124.306	120.8	931
chr1	91322022	91322350	ATACpk_peak_932	42	.	3.27282	6.31656	4.24321	150
[truncated: 82,007 more rows]

## Sheet: ATACblfilt_CommonPks
Chromosome	Start	End	Name	Score	Strand	Signal Value	pValue (-log10)	qValue (-log10)
chr1	3042540	3043226	ATACpk_peak_1	116	.	5.44033	14.3002	11.646	436
chr1	3042540	3043226	ATACpk_peak_1	116	.	5.44033	14.3002	11.646	436
chr1	3042540	3043226	ATACpk_peak_1	116	.	5.44033	14.3002	11.646	436
chr1	3042530	3043234	ATACpk_peak_1	116	.	5.44033	14.3002	11.646	436
chr1	3042530	3043234	ATACpk_peak_1	116	.	5.44033	14.3002	11.646	436
chr1	3042530	3043234	ATACpk_peak_1	116	.	5.44033	14.3002	11.646	436
chr1	3042530	3043234	ATACpk_peak_1	116	.	5.44033	14.3002	11.646	436
chr1	3042530	3043234	ATACpk_peak_1	116	.	5.44033	14.3002	11.646	436
chr1	3042530	3043234	ATACpk_peak_1	116	.	5.44033	14.3002	11.646	436
chr1	3054406	3054806	ATACpk_peak_2	124	.	5.62792	15.1431	12.4635	261
chr1	3054406	3054806	ATACpk_peak_2	124	.	5.62792	15.1431	12.4635	261
chr1	3054406	3054806	ATACpk_peak_2	124	.	5.62792	15.1431	12.4635	261
chr1	3054365	3054882	ATACpk_peak_2	124	.	5.62792	15.1431	12.4635	261
chr1	3054365	3054882	ATACpk_peak_2	124	.	5.62792	15.1431	12.4635	261
chr1	3054365	3054882	ATACpk_peak_2	124	.	5.62792	15.1431	12.4635	261
chr1	3671725	3672114	ATACpk_peak_3	92	.	4.87753	11.8608	9.28651	211
chr1	3671725	3672114	ATACpk_peak_3	92	.	4.87753	11.8608	9.28651	211
chr1	3671725	3672114	ATACpk_peak_3	92	.	4.87753	11.8608	9.28651	211
chr1	3671725	3672114	ATACpk_peak_3	92	.	4.87753	11.8608	9.28651	211
chr1	3671725	3672114	ATACpk_peak_3	92	.	4.87753	11.8608	9.28651	211
chr1	3671725	3672114	ATACpk_peak_3	92	.	4.87753	11.8608	9.28651	211
chr1	3671906	3672114	ATACpk_peak_3	92	.	4.87753	11.8608	9.28651	211
chr1	3671906	3672114	ATACpk_peak_3	92	.	4.87753	11.8608	9.28651	211
chr1	3671906	3672114	ATACpk_peak_3	92	.	4.87753	11.8608	9.28651	211
chr1	4256546	4258680	ATACpk_peak_4	324	.	9.56747	35.5699	32.4211	930
chr1	4256546	4258680	ATACpk_peak_4	324	.	9.56747	35.5699	32.4211	930
chr1	4256546	4258680	ATACpk_peak_4	324	.	9.56747	35.5699	32.4211	930
chr1	4256478	4258680	ATACpk_peak_4	324	.	9.56747	35.5699	32.4211	930
chr1	4256478	4258680	ATACpk_peak_4	324	.	9.56747	35.5699	32.4211	930
chr1	4256478	4258680	ATACpk_peak_4	324	.	9.56747	35.5699	32.4211	930
chr1	4256606	4258680	ATACpk_peak_4	324	.	9.56747	35.5699	32.4211	930
chr1	4256606	4258680	ATACpk_peak_4	324	.	9.56747	35.5699	32.4211	930
chr1	4256606	4258680	ATACpk_peak_4	324	.	9.56747	35.5699	32.4211	930
chr1	4352300	4353014	ATACpk_peak_5	92	.	4.87753	11.8608	9.28651	219
chr1	4352300	4353014	ATACpk_peak_5	92	.	4.87753	11.8608	9.28651	219
chr1	4352300	4353014	ATACpk_peak_5	92	.	4.87753	11.8608	9.28651	219
chr1	4352300	4352761	ATACpk_peak_5	92	.	4.87753	11.8608	9.28651	219
chr1	4352300	4352761	ATACpk_peak_5	92	.	4.87753	11.8608	9.28651	219
chr1	4352300	4352761	ATACpk_peak_5	92	.	4.87753	11.8608	9.28651	219
chr1	4352300	4352823	ATACpk_peak_5	92	.	4.87753	11.8608	9.28651	219
chr1	4352300	4352823	ATACpk_peak_5	92	.	4.87753	11.8608	9.28651	219
chr1	4352300	4352823	ATACpk_peak_5	92	.	4.87753	11.8608	9.28651	219
chr1	4492191	4492768	ATACpk_peak_6	50	.	3.75195	7.43695	5.05349	163
chr1	4492191	4492768	ATACpk_peak_6	50	.	3.75195	7.43695	5.05349	163
chr1	4492191	4492768	ATACpk_peak_6	50	.	3.75195	7.43695	5.05349	163
chr1	4492191	4492768	ATACpk_peak_6	50	.	3.75195	7.43695	5.05349	163
chr1	4492191	4492768	ATACpk_peak_6	50	.	3.75195	7.43695	5.05349	163
chr1	4492191	4492768	ATACpk_peak_6	50	.	3.75195	7.43695	5.05349	163
chr1	4492191	4492595	ATACpk_peak_6	50	.	3.75195	7.43695	5.05349	163
chr1	4492191	4492595	ATACpk_peak_6	50	.	3.75195	7.43695	5.05349	163
chr1	4492191	4492595	ATACpk_peak_6	50	.	3.75195	7.43695	5.05349	163
chr1	4496695	4496756	ATACpk_peak_7	26	.	3.00156	4.89156	2.67543	362
chr1	4496695	4496756	ATACpk_peak_7	26	.	3.00156	4.89156	2.67543	362
chr1	4496695	4496756	ATACpk_peak_7	26	.	3.00156	4.89156	2.67543	362
chr1	4496568	4496756	ATACpk_peak_7	26	.	3.00156	4.89156	2.67543	362
chr1	4496568	4496756	ATACpk_peak_7	26	.	3.00156	4.89156	2.67543	362
chr1	4496568	4496756	ATACpk_peak_7	26	.	3.00156	4.89156	2.67543	362
chr1	4496566	4496756	ATACpk_peak_7	26	.	3.00156	4.89156	2.67543	362
chr1	4496566	4496756	ATACpk_peak_7	26	.	3.00156	4.89156	2.67543	362
chr1	4496566	4496756	ATACpk_peak_7	26	.	3.00156	4.89156	2.67543	362
chr1	4497029	4497327	ATACpk_peak_8	32	.	3.18916	5.49317	3.23067	87
chr1	4497029	4497327	ATACpk_peak_8	32	.	3.18916	5.49317	3.23067	87
chr1	4497029	4497327	ATACpk_peak_8	32	.	3.18916	5.49317	3.23067	87
chr1	4497029	4497327	ATACpk_peak_8	32	.	3.18916	5.49317	3.23067	87
chr1	4497029	4497327	ATACpk_peak_8	32	.	3.18916	5.49317	3.23067	87
chr1	4497029	4497327	ATACpk_peak_8	32	.	3.18916	5.49317	3.23067	87
chr1	4497029	4497327	ATACpk_peak_8	32	.	3.18916	5.49317	3.23067	87
chr1	4497029	4497327	ATACpk_peak_8	32	.	3.18916	5.49317	3.23067	87
chr1	4497029	4497327	ATACpk_peak_8	32	.	3.18916	5.49317	3.23067	87
chr1	4559882	4560848	ATACpk_peak_9	100	.	5.06513	12.6585	10.057	458
chr1	4559882	4560848	ATACpk_peak_9	100	.	5.06513	12.6585	10.057	458
chr1	4559882	4560848	ATACpk_peak_9	100	.	5.06513	12.6585	10.057	458
chr1	4559882	4560834	ATACpk_peak_9	100	.	5.06513	12.6585	10.057	458
chr1	4559882	4560834	ATACpk_peak_9	100	.	5.06513	12.6585	10.057	458
chr1	4559882	4560834	ATACpk_peak_9	100	.	5.06513	12.6585	10.057	458
chr1	4559882	4560848	ATACpk_peak_9	100	.	5.06513	12.6585	10.057	458
chr1	4559882	4560848	ATACpk_peak_9	100	.	5.06513	12.6585	10.057	458
chr1	4559882	4560848	ATACpk_peak_9	100	.	5.06513	12.6585	10.057	458
chr1	4785480	4785825	ATACpk_peak_10	100	.	5.06513	12.6585	10.057	172
chr1	4785480	4785825	ATACpk_peak_10	100	.	5.06513	12.6585	10.057	172
chr1	4785480	4785825	ATACpk_peak_10	100	.	5.06513	12.6585	10.057	172
chr1	4785470	4785825	ATACpk_peak_10	100	.	5.06513	12.6585	10.057	172
chr1	4785470	4785825	ATACpk_peak_10	100	.	5.06513	12.6585	10.057	172
chr1	4785470	4785825	ATACpk_peak_10	100	.	5.06513	12.6585	10.057	172
chr1	4785470	4785825	ATACpk_peak_10	100	.	5.06513	12.6585	10.057	172
chr1	4785470	4785825	ATACpk_peak_10	100	.	5.06513	12.6585	10.057	172
chr1	4785470	4785825	ATACpk_peak_10	100	.	5.06513	12.6585	10.057	172
chr1	4807593	4808123	ATACpk_peak_11	150	.	6.19072	17.7546	15.0004	191
chr1	4807593	4808164	ATACpk_peak_11	150	.	6.19072	17.7546	15.0004	191
chr1	4807593	4808164	ATACpk_peak_11	150	.	6.19072	17.7546	15.0004	191
chr1	4807695	4808123	ATACpk_peak_11	150	.	6.19072	17.7546	15.0004	191
chr1	4807695	4808135	ATACpk_peak_11	150	.	6.19072	17.7546	15.0004	191
chr1	4807695	4808135	ATACpk_peak_11	150	.	6.19072	17.7546	15.0004	191
chr1	4807650	4808123	ATACpk_peak_11	150	.	6.19072	17.7546	15.0004	191
chr1	4807650	4808164	ATACpk_peak_11	150	.	6.19072	17.7546	15.0004	191
chr1	4807650	4808164	ATACpk_peak_11	150	.	6.19072	17.7546	15.0004	191
chr1	4857489	4858248	ATACpk_peak_13	292	.	9.00468	32.3804	29.2928	333
chr1	4857489	4858248	ATACpk_peak_13	292	.	9.00468	32.3804	29.2928	333
chr1	4857489	4858248	ATACpk_peak_13	292	.	9.00468	32.3804	29.2928	333
chr1	4857489	4858248	ATACpk_peak_13	292	.	9.00468	32.3804	29.2928	333
chr1	4857489	4858248	ATACpk_peak_13	292	.	9.00468	32.3804	29.2928	333
chr1	4857489	4858248	ATACpk_peak_13	292	.	9.00468	32.3804	29.2928	333
chr1	4857489	4858248	ATACpk_peak_13	292	.	9.00468	32.3804	29.2928	333
chr1	4857489	4858248	ATACpk_peak_13	292	.	9.00468	32.3804	29.2928	333
chr1	4857489	4858248	ATACpk_peak_13	292	.	9.00468	32.3804	29.2928	333
chr1	5072175	5072792	ATACpk_peak_14	63	.	4.12714	8.83787	6.38376	385
chr1	5072175	5072792	ATACpk_peak_14	63	.	4.12714	8.83787	6.38376	385
chr1	5072175	5072792	ATACpk_peak_14	63	.	4.12714	8.83787	6.38376	385
chr1	5072175	5072792	ATACpk_peak_14	63	.	4.12714	8.83787	6.38376	385
chr1	5072175	5072792	ATACpk_peak_14	63	.	4.12714	8.83787	6.38376	385
chr1	5072175	5072792	ATACpk_peak_14	63	.	4.12714	8.83787	6.38376	385
chr1	5082805	5083582	ATACpk_peak_15	150	.	6.19072	17.7546	15.0004	493
chr1	5082805	5083582	ATACpk_peak_15	150	.	6.19072	17.7546	15.0004	493
chr1	5082805	5083582	ATACpk_peak_15	150	.	6.19072	17.7546	15.0004	493
chr1	5082838	5083582	ATACpk_peak_15	150	.	6.19072	17.7546	15.0004	493
chr1	5082838	5083582	ATACpk_peak_15	150	.	6.19072	17.7546	15.0004	493
chr1	5082838	5083582	ATACpk_peak_15	150	.	6.19072	17.7546	15.0004	493
chr1	5082805	5083582	ATACpk_peak_15	150	.	6.19072	17.7546	15.0004	493
chr1	5082805	5083582	ATACpk_peak_15	150	.	6.19072	17.7546	15.0004	493
chr1	5082805	5083582	ATACpk_peak_15	150	.	6.19072	17.7546	15.0004	493
chr1	5109881	5114236	ATACpk_peak_16	313	.	9.37987	34.4981	31.3698	2814
chr1	5109881	5114236	ATACpk_peak_16	313	.	9.37987	34.4981	31.3698	2814
chr1	5109881	5114236	ATACpk_peak_16	313	.	9.37987	34.4981	31.3698	2814
chr1	5109852	5114236	ATACpk_peak_16	313	.	9.37987	34.4981	31.3698	2814
chr1	5109852	5114236	ATACpk_peak_16	313	.	9.37987	34.4981	31.3698	2814
chr1	5109852	5114236	ATACpk_peak_16	313	.	9.37987	34.4981	31.3698	2814
chr1	5109852	5114236	ATACpk_peak_16	313	.	9.37987	34.4981	31.3698	2814
chr1	5109852	5114236	ATACpk_peak_16	313	.	9.37987	34.4981	31.3698	2814
chr1	5109852	5114236	ATACpk_peak_16	313	.	9.37987	34.4981	31.3698	2814
chr1	6214208	6215419	ATACpk_peak_18	324	.	9.56747	35.5699	32.4211	396
chr1	6214208	6215419	ATACpk_peak_18	324	.	9.56747	35.5699	32.4211	396
chr1	6214208	6215419	ATACpk_peak_18	324	.	9.56747	35.5699	32.4211	396
chr1	6214208	6215419	ATACpk_peak_18	324	.	9.56747	35.5699	32.4211	396
chr1	6214208	6215419	ATACpk_peak_18	324	.	9.56747	35.5699	32.4211	396
chr1	6214208	6215419	ATACpk_peak_18	324	.	9.56747	35.5699	32.4211	396
chr1	6214208	6215297	ATACpk_peak_18	324	.	9.56747	35.5699	32.4211	396
chr1	6214208	6215297	ATACpk_peak_18	324	.	9.56747	35.5699	32.4211	396
chr1	6214208	6215297	ATACpk_peak_18	324	.	9.56747	35.5699	32.4211	396
chr1	6382792	6383190	ATACpk_peak_19	124	.	5.62792	15.1431	12.4635	241
chr1	6382792	6383190	ATACpk_peak_19	124	.	5.62792	15.1431	12.4635	241
chr1	6382792	6383190	ATACpk_peak_19	124	.	5.62792	15.1431	12.4635	241
chr1	6382792	6383190	ATACpk_peak_19	124	.	5.62792	15.1431	12.4635	241
chr1	6382792	6383190	ATACpk_peak_19	124	.	5.62792	15.1431	12.4635	241
chr1	6382792	6383190	ATACpk_peak_19	124	.	5.62792	15.1431	12.4635	241
chr1	6382802	6383190	ATACpk_peak_19	124	.	5.62792	15.1431	12.4635	241
chr1	6382802	6383190	ATACpk_peak_19	124	.	5.62792	15.1431	12.4635	241
chr1	6382802	6383190	ATACpk_peak_19	124	.	5.62792	15.1431	12.4635	241
chr1	6441180	6442303	ATACpk_peak_20	85	.	4.68994	11.0793	8.53295	621
chr1	6441180	6442303	ATACpk_peak_20	85	.	4.68994	11.0793	8.53295	621
chr1	6441180	6442303	ATACpk_peak_20	85	.	4.68994	11.0793	8.53295	621
chr1	6441028	6442303	ATACpk_peak_20	85	.	4.68994	11.0793	8.53295	621
chr1	6440937	6442303	ATACpk_peak_20	85	.	4.68994	11.0793	8.53295	621
chr1	6440937	6442303	ATACpk_peak_20	85	.	4.68994	11.0793	8.53295	621
chr1	6441403	6441803	ATACpk_peak_20	85	.	4.68994	11.0793	8.53295	621
chr1	6441403	6441803	ATACpk_peak_20	85	.	4.68994	11.0793	8.53295	621
chr1	6441403	6441803	ATACpk_peak_20	85	.	4.68994	11.0793	8.53295	621
chr1	7088625	7089201	ATACpk_peak_22	262	.	8.44189	29.2712	26.2456	359
chr1	7088625	7089201	ATACpk_peak_22	262	.	8.44189	29.2712	26.2456	359
chr1	7088625	7089201	ATACpk_peak_22	262	.	8.44189	29.2712	26.2456	359
chr1	7088571	7089174	ATACpk_peak_22	262	.	8.44189	29.2712	26.2456	359
chr1	7088571	7089174	ATACpk_peak_22	262	.	8.44189	29.2712	26.2456	359
chr1	7088571	7089174	ATACpk_peak_22	262	.	8.44189	29.2712	26.2456	359
chr1	7088522	7089135	ATACpk_peak_22	262	.	8.44189	29.2712	26.2456	359
chr1	7088522	7089135	ATACpk_peak_22	262	.	8.44189	29.2712	26.2456	359
chr1	7088522	7089135	ATACpk_peak_22	262	.	8.44189	29.2712	26.2456	359
chr1	7334981	7335231	ATACpk_peak_23	32	.	3.18916	5.49317	3.23067	207
chr1	7334981	7335231	ATACpk_peak_23	32	.	3.18916	5.49317	3.23067	207
chr1	7334981	7335231	ATACpk_peak_23	32	.	3.18916	5.49317	3.23067	207
chr1	7334981	7335472	ATACpk_peak_23	32	.	3.18916	5.49317	3.23067	207
chr1	7334981	7335379	ATACpk_peak_23	32	.	3.18916	5.49317	3.23067	207
chr1	7334981	7335472	ATACpk_peak_23	32	.	3.18916	5.49317	3.23067	207
chr1	7388409	7388770	ATACpk_peak_25	21	.	2.81396	4.31522	2.14996	322
chr1	7388409	7388770	ATACpk_peak_25	21	.	2.81396	4.31522	2.14996	322
chr1	7388409	7388770	ATACpk_peak_25	21	.	2.81396	4.31522	2.14996	322
chr1	7397189	7398735	ATACpk_peak_26	562	.	13.507	59.81	56.2679	902
chr1	7397189	7398735	ATACpk_peak_26	562	.	13.507	59.81	56.2679	902
chr1	7397189	7398735	ATACpk_peak_26	562	.	13.507	59.81	56.2679	902
chr1	7397189	7398804	ATACpk_peak_26	562	.	13.507	59.81	56.2679	902
chr1	7397189	7398804	ATACpk_peak_26	562	.	13.507	59.81	56.2679	902
chr1	7397189	7398804	ATACpk_peak_26	562	.	13.507	59.81	56.2679	902
chr1	7397656	7398657	ATACpk_peak_26	562	.	13.507	59.81	56.2679	902
chr1	7397656	7398657	ATACpk_peak_26	562	.	13.507	59.81	56.2679	902
chr1	7397656	7398657	ATACpk_peak_26	562	.	13.507	59.81	56.2679	902
chr1	9544930	9546234	ATACpk_peak_29	802	.	17.0714	84.0653	80.2312	944
chr1	9544930	9546234	ATACpk_peak_29	802	.	17.0714	84.0653	80.2312	944
chr1	9544930	9546234	ATACpk_peak_29	802	.	17.0714	84.0653	80.2312	944
chr1	9545036	9546234	ATACpk_peak_29	802	.	17.0714	84.0653	80.2312	944
chr1	9545036	9546234	ATACpk_peak_29	802	.	17.0714	84.0653	80.2312	944
chr1	9545036	9546234	ATACpk_peak_29	802	.	17.0714	84.0653	80.2312	944
chr1	9545055	9546234	ATACpk_peak_29	802	.	17.0714	84.0653	80.2312	944
chr1	9545055	9546234	ATACpk_peak_29	802	.	17.0714	84.0653	80.2312	944
chr1	9545055	9546234	ATACpk_peak_29	802	.	17.0714	84.0653	80.2312	944
chr1	9699599	9701108	ATACpk_peak_30	686	.	15.383	72.3379	68.6356	1040
chr1	9699599	9701108	ATACpk_peak_30	686	.	15.383	72.3379	68.6356	1040
chr1	9699599	9701108	ATACpk_peak_30	686	.	15.383	72.3379	68.6356	1040
chr1	9699599	9701294	ATACpk_peak_30	686	.	15.383	72.3379	68.6356	1040
chr1	9699599	9701297	ATACpk_peak_30	686	.	15.383	72.3379	68.6356	1040
chr1	9699599	9701297	ATACpk_peak_30	686	.	15.383	72.3379	68.6356	1040
chr1	9699631	9701168	ATACpk_peak_30	686	.	15.383	72.3379	68.6356	1040
chr1	9699631	9701168	ATACpk_peak_30	686	.	15.383	72.3379	68.6356	1040
chr1	9699631	9701168	ATACpk_peak_30	686	.	15.383	72.3379	68.6356	1040
chr1	9747474	9748754	ATACpk_peak_31	514	.	12.7566	54.9621	51.4896	961
chr1	9747474	9748754	ATACpk_peak_31	514	.	12.7566	54.9621	51.4896	961
chr1	9747474	9748754	ATACpk_peak_31	514	.	12.7566	54.9621	51.4896	961
chr1	9747474	9748754	ATACpk_peak_31	514	.	12.7566	54.9621	51.4896	961
chr1	9747474	9748754	ATACpk_peak_31	514	.	12.7566	54.9621	51.4896	961
chr1	9747474	9748754	ATACpk_peak_31	514	.	12.7566	54.9621	51.4896	961
chr1	9747474	9748754	ATACpk_peak_31	514	.	12.7566	54.9621	51.4896	961
chr1	9747474	9748754	ATACpk_peak_31	514	.	12.7566	54.9621	51.4896	961
chr1	9747474	9748754	ATACpk_peak_31	514	.	12.7566	54.9621	51.4896	961
chr1	9768259	9769090	ATACpk_peak_32	57	.	3.93955	8.12754	5.70762	1037
chr1	9768259	9769090	ATACpk_peak_32	57	.	3.93955	8.12754	5.70762	1037
chr1	9768259	9769090	ATACpk_peak_32	57	.	3.93955	8.12754	5.70762	1037
chr1	9768259	9769137	ATACpk_peak_32	57	.	3.93955	8.12754	5.70762	1037
chr1	9768259	9769137	ATACpk_peak_32	57	.	3.93955	8.12754	5.70762	1037
chr1	9768259	9769137	ATACpk_peak_32	57	.	3.93955	8.12754	5.70762	1037
chr1	9768740	9769137	ATACpk_peak_32	57	.	3.93955	8.12754	5.70762	1037
chr1	9768740	9769137	ATACpk_peak_32	57	.	3.93955	8.12754	5.70762	1037
chr1	9768740	9769137	ATACpk_peak_32	57	.	3.93955	8.12754	5.70762	1037
chr1	9848087	9848688	ATACpk_peak_33	204	.	7.3163	23.3155	20.4228	367
chr1	9848087	9848688	ATACpk_peak_33	204	.	7.3163	23.3155	20.4228	367
chr1	9848087	9848688	ATACpk_peak_33	204	.	7.3163	23.3155	20.4228	367
chr1	9848087	9848795	ATACpk_peak_33	204	.	7.3163	23.3155	20.4228	367
chr1	9848087	9848795	ATACpk_peak_33	204	.	7.3163	23.3155	20.4228	367
chr1	9848087	9848795	ATACpk_peak_33	204	.	7.3163	23.3155	20.4228	367
chr1	9848087	9848679	ATACpk_peak_33	204	.	7.3163	23.3155	20.4228	367
chr1	9848087	9848679	ATACpk_peak_33	204	.	7.3163	23.3155	20.4228	367
chr1	9848087	9848679	ATACpk_peak_33	204	.	7.3163	23.3155	20.4228	367
chr1	9907939	9909443	ATACpk_peak_35	252	.	8.25429	28.2535	25.2493	762
chr1	9907939	9909443	ATACpk_peak_35	252	.	8.25429	28.2535	25.2493	762
chr1	9907939	9909443	ATACpk_peak_35	252	.	8.25429	28.2535	25.2493	762
chr1	9907939	9909415	ATACpk_peak_35	252	.	8.25429	28.2535	25.2493	762
chr1	9907939	9909415	ATACpk_peak_35	252	.	8.25429	28.2535	25.2493	762
chr1	9907939	9909415	ATACpk_peak_35	252	.	8.25429	28.2535	25.2493	762
chr1	9908558	9909232	ATACpk_peak_35	252	.	8.25429	28.2535	25.2493	762
chr1	9908558	9909232	ATACpk_peak_35	252	.	8.25429	28.2535	25.2493	762
chr1	9908558	9909232	ATACpk_peak_35	252	.	8.25429	28.2535	25.2493	762
chr1	9943795	9944628	ATACpk_peak_36	491	.	12.3814	52.5757	49.1389	344
chr1	9943795	9944628	ATACpk_peak_36	491	.	12.3814	52.5757	49.1389	344
chr1	9943795	9944628	ATACpk_peak_36	491	.	12.3814	52.5757	49.1389	344
chr1	9943795	9944783	ATACpk_peak_36	491	.	12.3814	52.5757	49.1389	344
chr1	9943795	9944783	ATACpk_peak_36	491	.	12.3814	52.5757	49.1389	344
chr1	9943795	9944783	ATACpk_peak_36	491	.	12.3814	52.5757	49.1389	344
chr1	9943795	9944556	ATACpk_peak_36	491	.	12.3814	52.5757	49.1389	344
chr1	9943795	9944556	ATACpk_peak_36	491	.	12.3814	52.5757	49.1389	344
chr1	9943795	9944556	ATACpk_peak_36	491	.	12.3814	52.5757	49.1389	344
chr1	9967167	9968274	ATACpk_peak_37	252	.	8.25429	28.2535	25.2493	601
chr1	9967167	9968274	ATACpk_peak_37	252	.	8.25429	28.2535	25.2493	601
chr1	9967167	9968274	ATACpk_peak_37	252	.	8.25429	28.2535	25.2493	601
chr1	9967167	9968265	ATACpk_peak_37	252	.	8.25429	28.2535	25.2493	601
chr1	9967167	9968265	ATACpk_peak_37	252	.	8.25429	28.2535	25.2493	601
chr1	9967167	9968265	ATACpk_peak_37	252	.	8.25429	28.2535	25.2493	601
chr1	9967167	9968258	ATACpk_peak_37	252	.	8.25429	28.2535	25.2493	601
chr1	9967167	9968258	ATACpk_peak_37	252	.	8.25429	28.2535	25.2493	601
chr1	9967167	9968258	ATACpk_peak_37	252	.	8.25429	28.2535	25.2493	601
chr1	10008906	10009409	ATACpk_peak_38	77	.	4.50234	10.3145	7.79751	237
chr1	10008906	10009409	ATACpk_peak_38	77	.	4.50234	10.3145	7.79751	237
chr1	10008906	10009409	ATACpk_peak_38	77	.	4.50234	10.3145	7.79751	237
chr1	10008819	10009409	ATACpk_peak_38	77	.	4.50234	10.3145	7.79751	237
chr1	10008819	10009409	ATACpk_peak_38	77	.	4.50234	10.3145	7.79751	237
chr1	10008819	10009409	ATACpk_peak_38	77	.	4.50234	10.3145	7.79751	237
chr1	10008948	10009409	ATACpk_peak_38	77	.	4.50234	10.3145	7.79751	237
chr1	10008948	10009409	ATACpk_peak_38	77	.	4.50234	10.3145	7.79751	237
chr1	10008948	10009409	ATACpk_peak_38	77	.	4.50234	10.3145	7.79751	237
chr1	10037527	10040276	ATACpk_peak_39	514	.	12.7566	54.9621	51.4896	2531
chr1	10037527	10040456	ATACpk_peak_39	514	.	12.7566	54.9621	51.4896	2531
chr1	10037527	10040456	ATACpk_peak_39	514	.	12.7566	54.9621	51.4896	2531
chr1	10037527	10040276	ATACpk_peak_39	514	.	12.7566	54.9621	51.4896	2531
chr1	10037527	10040456	ATACpk_peak_39	514	.	12.7566	54.9621	51.4896	2531
chr1	10037527	10040456	ATACpk_peak_39	514	.	12.7566	54.9621	51.4896	2531
chr1	10037527	10038719	ATACpk_peak_39	514	.	12.7566	54.9621	51.4896	2531
chr1	10037527	10038719	ATACpk_peak_39	514	.	12.7566	54.9621	51.4896	2531
chr1	10037527	10038719	ATACpk_peak_39	514	.	12.7566	54.9621	51.4896	2531
chr1	10038969	10040276	ATACpk_peak_39	514	.	12.7566	54.9621	51.4896	2531
chr1	10038969	10040302	ATACpk_peak_39	514	.	12.7566	54.9621	51.4896	2531
chr1	10038969	10040302	ATACpk_peak_39	514	.	12.7566	54.9621	51.4896	2531
chr1	10100615	10101808	ATACpk_peak_40	262	.	8.44189	29.2712	26.2456	615
chr1	10100615	10101859	ATACpk_peak_40	262	.	8.44189	29.2712	26.2456	615
chr1	10100615	10101859	ATACpk_peak_40	262	.	8.44189	29.2712	26.2456	615
chr1	10100615	10101719	ATACpk_peak_40	262	.	8.44189	29.2712	26.2456	615
chr1	10100615	10101719	ATACpk_peak_40	262	.	8.44189	29.2712	26.2456	615
chr1	10100615	10101719	ATACpk_peak_40	262	.	8.44189	29.2712	26.2456	615
chr1	10100635	10101691	ATACpk_peak_40	262	.	8.44189	29.2712	26.2456	615
chr1	10100635	10101691	ATACpk_peak_40	262	.	8.44189	29.2712	26.2456	615
chr1	10100635	10101691	ATACpk_peak_40	262	.	8.44189	29.2712	26.2456	615
chr1	10231915	10233267	ATACpk_peak_41	252	.	8.25429	28.2535	25.2493	1170
chr1	10231915	10233267	ATACpk_peak_41	252	.	8.25429	28.2535	25.2493	1170
chr1	10231915	10233267	ATACpk_peak_41	252	.	8.25429	28.2535	25.2493	1170
chr1	10231915	10233267	ATACpk_peak_41	252	.	8.25429	28.2535	25.2493	1170
chr1	10231915	10233267	ATACpk_peak_41	252	.	8.25429	28.2535	25.2493	1170
chr1	10231915	10233267	ATACpk_peak_41	252	.	8.25429	28.2535	25.2493	1170
chr1	10232139	10233267	ATACpk_peak_41	252	.	8.25429	28.2535	25.2493	1170
chr1	10232139	10233267	ATACpk_peak_41	252	.	8.25429	28.2535	25.2493	1170
chr1	10232139	10233267	ATACpk_peak_41	252	.	8.25429	28.2535	25.2493	1170
chr1	10478443	10479816	ATACpk_peak_42	124	.	5.62792	15.1431	12.4635	871
chr1	10478443	10479816	ATACpk_peak_42	124	.	5.62792	15.1431	12.4635	871
chr1	10478443	10479816	ATACpk_peak_42	124	.	5.62792	15.1431	12.4635	871
chr1	10478434	10479847	ATACpk_peak_42	124	.	5.62792	15.1431	12.4635	871
chr1	10478414	10479921	ATACpk_peak_42	124	.	5.62792	15.1431	12.4635	871
chr1	10478414	10479921	ATACpk_peak_42	124	.	5.62792	15.1431	12.4635	871
chr1	10478492	10479729	ATACpk_peak_42	124	.	5.62792	15.1431	12.4635	871
chr1	10478492	10479729	ATACpk_peak_42	124	.	5.62792	15.1431	12.4635	871
chr1	10478492	10479729	ATACpk_peak_42	124	.	5.62792	15.1431	12.4635	871
chr1	10695480	10695656	ATACpk_peak_43	26	.	3.00156	4.89156	2.67543	101
chr1	10695480	10695656	ATACpk_peak_43	26	.	3.00156	4.89156	2.67543	101
chr1	10695480	10695656	ATACpk_peak_43	26	.	3.00156	4.89156	2.67543	101
chr1	10695480	10695575	ATACpk_peak_43	26	.	3.00156	4.89156	2.67543	101
chr1	10695480	10695575	ATACpk_peak_43	26	.	3.00156	4.89156	2.67543	101
chr1	10695480	10695575	ATACpk_peak_43	26	.	3.00156	4.89156	2.67543	101
chr1	11328851	11329709	ATACpk_peak_44	92	.	4.87753	11.8608	9.28651	844
chr1	11328851	11329709	ATACpk_peak_44	92	.	4.87753	11.8608	9.28651	844
chr1	11328851	11329709	ATACpk_peak_44	92	.	4.87753	11.8608	9.28651	844
chr1	11328740	11329693	ATACpk_peak_44	92	.	4.87753	11.8608	9.28651	844
chr1	11328740	11329693	ATACpk_peak_44	92	.	4.87753	11.8608	9.28651	844
chr1	11328740	11329693	ATACpk_peak_44	92	.	4.87753	11.8608	9.28651	844
chr1	11328896	11329802	ATACpk_peak_44	92	.	4.87753	11.8608	9.28651	844
chr1	11328896	11329802	ATACpk_peak_44	92	.	4.87753	11.8608	9.28651	844
chr1	11328896	11329802	ATACpk_peak_44	92	.	4.87753	11.8608	9.28651	844
chr1	12657473	12657804	ATACpk_peak_46	176	.	6.75351	20.4818	17.6567	180
chr1	12657473	12657804	ATACpk_peak_46	176	.	6.75351	20.4818	17.6567	180
chr1	12657473	12657804	ATACpk_peak_46	176	.	6.75351	20.4818	17.6567	180
chr1	12657473	12657811	ATACpk_peak_46	176	.	6.75351	20.4818	17.6567	180
chr1	12657473	12657811	ATACpk_peak_46	176	.	6.75351	20.4818	17.6567	180
chr1	12657473	12657811	ATACpk_peak_46	176	.	6.75351	20.4818	17.6567	180
chr1	12657473	12657782	ATACpk_peak_46	176	.	6.75351	20.4818	17.6567	180
chr1	12657473	12657782	ATACpk_peak_46	176	.	6.75351	20.4818	17.6567	180
chr1	12657473	12657782	ATACpk_peak_46	176	.	6.75351	20.4818	17.6567	180
chr1	12851150	12851443	ATACpk_peak_48	32	.	3.18916	5.49317	3.23067	190
chr1	12851150	12851443	ATACpk_peak_48	32	.	3.18916	5.49317	3.23067	190
chr1	12851150	12851443	ATACpk_peak_48	32	.	3.18916	5.49317	3.23067	190
chr1	12851402	12851443	ATACpk_peak_48	32	.	3.18916	5.49317	3.23067	190
chr1	12851402	12851443	ATACpk_peak_48	32	.	3.18916	5.49317	3.23067	190
chr1	12851402	12851443	ATACpk_peak_48	32	.	3.18916	5.49317	3.23067	190
chr1	13069222	13070222	ATACpk_peak_49	141	.	6.00312	16.8707	14.1409	725
chr1	13069222	13070222	ATACpk_peak_49	141	.	6.00312	16.8707	14.1409	725
chr1	13069222	13070222	ATACpk_peak_49	141	.	6.00312	16.8707	14.1409	725
chr1	13069619	13070222	ATACpk_peak_49	141	.	6.00312	16.8707	14.1409	725
chr1	13069619	13070222	ATACpk_peak_49	141	.	6.00312	16.8707	14.1409	725
chr1	13069619	13070222	ATACpk_peak_49	141	.	6.00312	16.8707	14.1409	725
chr1	13069204	13069208	ATACpk_peak_49	141	.	6.00312	16.8707	14.1409	725
chr1	13069204	13069208	ATACpk_peak_49	141	.	6.00312	16.8707	14.1409	725
chr1	13069204	13069208	ATACpk_peak_49	141	.	6.00312	16.8707	14.1409	725
chr1	13069585	13070079	ATACpk_peak_49	141	.	6.00312	16.8707	14.1409	725
chr1	13069585	13070079	ATACpk_peak_49	141	.	6.00312	16.8707	14.1409	725
chr1	13069585	13070079	ATACpk_peak_49	141	.	6.00312	16.8707	14.1409	725
chr1	13337931	13338966	ATACpk_peak_50	167	.	6.56591	19.5605	16.7585	681
chr1	13337868	13338966	ATACpk_peak_50	167	.	6.56591	19.5605	16.7585	681
chr1	13337868	13338897	ATACpk_peak_50	167	.	6.56591	19.5605	16.7585	681
chr1	13337931	13338784	ATACpk_peak_50	167	.	6.56591	19.5605	16.7585	681
chr1	13337741	13338784	ATACpk_peak_50	167	.	6.56591	19.5605	16.7585	681
chr1	13337823	13338784	ATACpk_peak_50	167	.	6.56591	19.5605	16.7585	681
chr1	13337931	13339027	ATACpk_peak_50	167	.	6.56591	19.5605	16.7585	681
chr1	13337807	13339027	ATACpk_peak_50	167	.	6.56591	19.5605	16.7585	681
chr1	13337823	13338897	ATACpk_peak_50	167	.	6.56591	19.5605	16.7585	681
chr1	13372284	13374614	ATACpk_peak_51	599	.	14.0698	63.5091	59.9166	360
chr1	13372284	13374614	ATACpk_peak_51	599	.	14.0698	63.5091	59.9166	360
chr1	13372284	13374614	ATACpk_peak_51	599	.	14.0698	63.5091	59.9166	360
chr1	13372211	13374647	ATACpk_peak_51	599	.	14.0698	63.5091	59.9166	360
chr1	13372211	13374647	ATACpk_peak_51	599	.	14.0698	63.5091	59.9166	360
chr1	13372211	13374647	ATACpk_peak_51	599	.	14.0698	63.5091	59.9166	360
chr1	13372211	13374634	ATACpk_peak_51	599	.	14.0698	63.5091	59.9166	360
chr1	13372211	13374634	ATACpk_peak_51	599	.	14.0698	63.5091	59.9166	360
chr1	13372211	13374634	ATACpk_peak_51	599	.	14.0698	63.5091	59.9166	360
chr1	13589252	13590539	ATACpk_peak_52	292	.	9.00468	32.3804	29.2928	910
chr1	13589252	13590539	ATACpk_peak_52	292	.	9.00468	32.3804	29.2928	910
chr1	13589252	13590539	ATACpk_peak_52	292	.	9.00468	32.3804	29.2928	910
chr1	13589114	13590412	ATACpk_peak_52	292	.	9.00468	32.3804	29.2928	910
chr1	13589114	13590412	ATACpk_peak_52	292	.	9.00468	32.3804	29.2928	910
chr1	13589114	13590412	ATACpk_peak_52	292	.	9.00468	32.3804	29.2928	910
chr1	13589095	13590212	ATACpk_peak_52	292	.	9.00468	32.3804	29.2928	910
chr1	13589095	13590212	ATACpk_peak_52	292	.	9.00468	32.3804	29.2928	910
chr1	13589095	13590212	ATACpk_peak_52	292	.	9.00468	32.3804	29.2928	910
chr1	13660219	13660660	ATACpk_peak_53	92	.	4.87753	11.8608	9.28651	238
chr1	13660219	13660660	ATACpk_peak_53	92	.	4.87753	11.8608	9.28651	238
chr1	13660219	13660660	ATACpk_peak_53	92	.	4.87753	11.8608	9.28651	238
chr1	13660219	13660697	ATACpk_peak_53	92	.	4.87753	11.8608	9.28651	238
chr1	13660219	13660697	ATACpk_peak_53	92	.	4.87753	11.8608	9.28651	238
chr1	13660219	13660697	ATACpk_peak_53	92	.	4.87753	11.8608	9.28651	238
chr1	13660219	13660616	ATACpk_peak_53	92	.	4.87753	11.8608	9.28651	238
chr1	13660219	13660616	ATACpk_peak_53	92	.	4.87753	11.8608	9.28651	238
chr1	13660219	13660616	ATACpk_peak_53	92	.	4.87753	11.8608	9.28651	238
chr1	14755358	14755692	ATACpk_peak_54	32	.	3.18916	5.49317	3.23067	135
chr1	14755358	14755692	ATACpk_peak_54	32	.	3.18916	5.49317	3.23067	135
chr1	14755358	14755692	ATACpk_peak_54	32	.	3.18916	5.49317	3.23067	135
chr1	14755358	14755682	ATACpk_peak_54	32	.	3.18916	5.49317	3.23067	135
chr1	14755358	14755682	ATACpk_peak_54	32	.	3.18916	5.49317	3.23067	135
chr1	14755358	14755682	ATACpk_peak_54	32	.	3.18916	5.49317	3.23067	135
chr1	14755375	14755692	ATACpk_peak_54	32	.	3.18916	5.49317	3.23067	135
chr1	14755375	14755692	ATACpk_peak_54	32	.	3.18916	5.49317	3.23067	135
chr1	14755375	14755692	ATACpk_peak_54	32	.	3.18916	5.49317	3.23067	135
chr1	15743025	15743061	ATACpk_peak_56	38	.	3.37675	6.11872	3.81342	137
chr1	15743025	15743187	ATACpk_peak_56	38	.	3.37675	6.11872	3.81342	137
chr1	15743025	15743304	ATACpk_peak_56	38	.	3.37675	6.11872	3.81342	137
chr1	15794395	15794669	ATACpk_peak_57	26	.	3.00156	4.89156	2.67543	89
chr1	15794395	15794669	ATACpk_peak_57	26	.	3.00156	4.89156	2.67543	89
chr1	15794395	15794669	ATACpk_peak_57	26	.	3.00156	4.89156	2.67543	89
chr1	15794455	15794718	ATACpk_peak_57	26	.	3.00156	4.89156	2.67543	89
chr1	15794455	15794718	ATACpk_peak_57	26	.	3.00156	4.89156	2.67543	89
chr1	15794455	15794718	ATACpk_peak_57	26	.	3.00156	4.89156	2.67543	89
chr1	15794395	15794689	ATACpk_peak_57	26	.	3.00156	4.89156	2.67543	89
chr1	15794395	15794689	ATACpk_peak_57	26	.	3.00156	4.89156	2.67543	89
chr1	15794395	15794689	ATACpk_peak_57	26	.	3.00156	4.89156	2.67543	89
chr1	15805295	15806321	ATACpk_peak_58	433	.	11.4434	46.7256	43.3798	453
chr1	15805295	15806321	ATACpk_peak_58	433	.	11.4434	46.7256	43.3798	453
chr1	15805295	15806321	ATACpk_peak_58	433	.	11.4434	46.7256	43.3798	453
chr1	15805194	15806239	ATACpk_peak_58	433	.	11.4434	46.7256	43.3798	453
chr1	15805194	15806239	ATACpk_peak_58	433	.	11.4434	46.7256	43.3798	453
chr1	15805194	15806239	ATACpk_peak_58	433	.	11.4434	46.7256	43.3798	453
chr1	15805293	15806200	ATACpk_peak_58	433	.	11.4434	46.7256	43.3798	453
chr1	15805293	15806200	ATACpk_peak_58	433	.	11.4434	46.7256	43.3798	453
chr1	15805293	15806200	ATACpk_peak_58	433	.	11.4434	46.7256	43.3798	453
chr1	16025881	16026061	ATACpk_peak_59	26	.	3.00156	4.89156	2.67543	268
chr1	16025948	16026061	ATACpk_peak_59	26	.	3.00156	4.89156	2.67543	268
chr1	16025881	16026061	ATACpk_peak_59	26	.	3.00156	4.89156	2.67543	268
chr1	16026537	16026736	ATACpk_peak_60	57	.	3.93955	8.12754	5.70762	170
chr1	16026537	16026736	ATACpk_peak_60	57	.	3.93955	8.12754	5.70762	170
chr1	16026537	16026736	ATACpk_peak_60	57	.	3.93955	8.12754	5.70762	170
chr1	16026366	16026736	ATACpk_peak_60	57	.	3.93955	8.12754	5.70762	170
chr1	16026366	16026736	ATACpk_peak_60	57	.	3.93955	8.12754	5.70762	170
chr1	16026366	16026736	ATACpk_peak_60	57	.	3.93955	8.12754	5.70762	170
chr1	16026366	16026736	ATACpk_peak_60	57	.	3.93955	8.12754	5.70762	170
chr1	16026366	16026736	ATACpk_peak_60	57	.	3.93955	8.12754	5.70762	170
chr1	16026366	16026736	ATACpk_peak_60	57	.	3.93955	8.12754	5.70762	170
chr1	16070851	16074630	ATACpk_peak_61	334	.	9.75507	36.6501	33.4809	1839
chr1	16070851	16074630	ATACpk_peak_61	334	.	9.75507	36.6501	33.4809	1839
chr1	16070851	16074625	ATACpk_peak_61	334	.	9.75507	36.6501	33.4809	1839
chr1	16070851	16074630	ATACpk_peak_61	334	.	9.75507	36.6501	33.4809	1839
chr1	16070851	16074630	ATACpk_peak_61	334	.	9.75507	36.6501	33.4809	1839
chr1	16070851	16074625	ATACpk_peak_61	334	.	9.75507	36.6501	33.4809	1839
chr1	16070851	16074630	ATACpk_peak_61	334	.	9.75507	36.6501	33.4809	1839
chr1	16070851	16074630	ATACpk_peak_61	334	.	9.75507	36.6501	33.4809	1839
chr1	16070851	16074625	ATACpk_peak_61	334	.	9.75507	36.6501	33.4809	1839
chr1	16087153	16087552	ATACpk_peak_62	57	.	3.93955	8.12754	5.70762	245
chr1	16087153	16087552	ATACpk_peak_62	57	.	3.93955	8.12754	5.70762	245
chr1	16087153	16087552	ATACpk_peak_62	57	.	3.93955	8.12754	5.70762	245
chr1	16087153	16087552	ATACpk_peak_62	57	.	3.93955	8.12754	5.70762	245
chr1	16087153	16087552	ATACpk_peak_62	57	.	3.93955	8.12754	5.70762	245
chr1	16087153	16087552	ATACpk_peak_62	57	.	3.93955	8.12754	5.70762	245
chr1	16092832	16093893	ATACpk_peak_63	303	.	9.19228	33.4349	30.3268	491
chr1	16092832	16093893	ATACpk_peak_63	303	.	9.19228	33.4349	30.3268	491
chr1	16092832	16093893	ATACpk_peak_63	303	.	9.19228	33.4349	30.3268	491
chr1	16092844	16093893	ATACpk_peak_63	303	.	9.19228	33.4349	30.3268	491
chr1	16092844	16093893	ATACpk_peak_63	303	.	9.19228	33.4349	30.3268	491
chr1	16092844	16093893	ATACpk_peak_63	303	.	9.19228	33.4349	30.3268	491
chr1	16092844	16093825	ATACpk_peak_63	303	.	9.19228	33.4349	30.3268	491
chr1	16092844	16093825	ATACpk_peak_63	303	.	9.19228	33.4349	30.3268	491
chr1	16092844	16093825	ATACpk_peak_63	303	.	9.19228	33.4349	30.3268	491
chr1	16104165	16106109	ATACpk_peak_64	223	.	7.6915	25.2597	22.3218	783
chr1	16104165	16106109	ATACpk_peak_64	223	.	7.6915	25.2597	22.3218	783
chr1	16104165	16106109	ATACpk_peak_64	223	.	7.6915	25.2597	22.3218	783
chr1	16104165	16106109	ATACpk_peak_64	223	.	7.6915	25.2597	22.3218	783
chr1	16104165	16106109	ATACpk_peak_64	223	.	7.6915	25.2597	22.3218	783
chr1	16104165	16106109	ATACpk_peak_64	223	.	7.6915	25.2597	22.3218	783
chr1	16104370	16105740	ATACpk_peak_64	223	.	7.6915	25.2597	22.3218	783
chr1	16104370	16105740	ATACpk_peak_64	223	.	7.6915	25.2597	22.3218	783
chr1	16104370	16105740	ATACpk_peak_64	223	.	7.6915	25.2597	22.3218	783
chr1	16618631	16619630	ATACpk_peak_65	185	.	6.94111	21.415	18.5672	640
chr1	16618631	16619630	ATACpk_peak_65	185	.	6.94111	21.415	18.5672	640
chr1	16618631	16619630	ATACpk_peak_65	185	.	6.94111	21.415	18.5672	640
chr1	16618631	16619490	ATACpk_peak_65	185	.	6.94111	21.415	18.5672	640
chr1	16618631	16619490	ATACpk_peak_65	185	.	6.94111	21.415	18.5672	640
chr1	16618631	16619490	ATACpk_peak_65	185	.	6.94111	21.415	18.5672	640
chr1	16618701	16619620	ATACpk_peak_65	185	.	6.94111	21.415	18.5672	640
chr1	16618701	16619620	ATACpk_peak_65	185	.	6.94111	21.415	18.5672	640
chr1	16618701	16619620	ATACpk_peak_65	185	.	6.94111	21.415	18.5672	640
chr1	16656494	16657479	ATACpk_peak_66	292	.	9.00468	32.3804	29.2928	462
chr1	16656494	16657479	ATACpk_peak_66	292	.	9.00468	32.3804	29.2928	462
chr1	16656494	16657479	ATACpk_peak_66	292	.	9.00468	32.3804	29.2928	462
chr1	16656546	16657401	ATACpk_peak_66	292	.	9.00468	32.3804	29.2928	462
chr1	16656546	16657401	ATACpk_peak_66	292	.	9.00468	32.3804	29.2928	462
chr1	16656546	16657401	ATACpk_peak_66	292	.	9.00468	32.3804	29.2928	462
chr1	16656568	16657503	ATACpk_peak_66	292	.	9.00468	32.3804	29.2928	462
chr1	16656568	16657503	ATACpk_peak_66	292	.	9.00468	32.3804	29.2928	462
chr1	16656568	16657503	ATACpk_peak_66	292	.	9.00468	32.3804	29.2928	462
chr1	16665114	16665630	ATACpk_peak_67	85	.	4.68994	11.0793	8.53295	210
chr1	16665114	16665630	ATACpk_peak_67	85	.	4.68994	11.0793	8.53295	210
chr1	16665114	16665630	ATACpk_peak_67	85	.	4.68994	11.0793	8.53295	210
chr1	16665007	16665600	ATACpk_peak_67	85	.	4.68994	11.0793	8.53295	210
chr1	16665007	16665600	ATACpk_peak_67	85	.	4.68994	11.0793	8.53295	210
chr1	16665007	16665600	ATACpk_peak_67	85	.	4.68994	11.0793	8.53295	210
chr1	16665116	16665719	ATACpk_peak_67	85	.	4.68994	11.0793	8.53295	210
chr1	16665116	16665719	ATACpk_peak_67	85	.	4.68994	11.0793	8.53295	210
chr1	16665116	16665719	ATACpk_peak_67	85	.	4.68994	11.0793	8.53295	210
chr1	16688408	16688784	ATACpk_peak_68	44	.	3.56435	6.76701	4.42147	288
chr1	16688408	16688784	ATACpk_peak_68	44	.	3.56435	6.76701	4.42147	288
chr1	17097003	17098083	ATACpk_peak_69	185	.	6.94111	21.415	18.5672	526
chr1	17096926	17098083	ATACpk_peak_69	185	.	6.94111	21.415	18.5672	526
chr1	17096926	17098083	ATACpk_peak_69	185	.	6.94111	21.415	18.5672	526
chr1	17097003	17098083	ATACpk_peak_69	185	.	6.94111	21.415	18.5672	526
chr1	17097003	17098083	ATACpk_peak_69	185	.	6.94111	21.415	18.5672	526
chr1	17097003	17098083	ATACpk_peak_69	185	.	6.94111	21.415	18.5672	526
chr1	17097013	17098083	ATACpk_peak_69	185	.	6.94111	21.415	18.5672	526
chr1	17097013	17098083	ATACpk_peak_69	185	.	6.94111	21.415	18.5672	526
chr1	17097013	17098083	ATACpk_peak_69	185	.	6.94111	21.415	18.5672	526
chr1	17122998	17123725	ATACpk_peak_70	38	.	3.37675	6.11872	3.81342	329
chr1	17122998	17123725	ATACpk_peak_70	38	.	3.37675	6.11872	3.81342	329
chr1	17122998	17123725	ATACpk_peak_70	38	.	3.37675	6.11872	3.81342	329
chr1	17123000	17123725	ATACpk_peak_70	38	.	3.37675	6.11872	3.81342	329
chr1	17123000	17123725	ATACpk_peak_70	38	.	3.37675	6.11872	3.81342	329
chr1	17123000	17123725	ATACpk_peak_70	38	.	3.37675	6.11872	3.81342	329
chr1	18058011	18058464	ATACpk_peak_71	38	.	3.37675	6.11872	3.81342	339
chr1	18058011	18058464	ATACpk_peak_71	38	.	3.37675	6.11872	3.81342	339
chr1	18058011	18058464	ATACpk_peak_71	38	.	3.37675	6.11872	3.81342	339
chr1	18058011	18058464	ATACpk_peak_71	38	.	3.37675	6.11872	3.81342	339
chr1	18058011	18058464	ATACpk_peak_71	38	.	3.37675	6.11872	3.81342	339
chr1	18058011	18058464	ATACpk_peak_71	38	.	3.37675	6.11872	3.81342	339
chr1	18078485	18079061	ATACpk_peak_72	63	.	4.12714	8.83787	6.38376	524
chr1	18078485	18079061	ATACpk_peak_72	63	.	4.12714	8.83787	6.38376	524
chr1	18078485	18078728	ATACpk_peak_72	63	.	4.12714	8.83787	6.38376	524
chr1	18278270	18278949	ATACpk_peak_74	32	.	3.18916	5.49317	3.23067	336
chr1	18278270	18278949	ATACpk_peak_74	32	.	3.18916	5.49317	3.23067	336
chr1	18278270	18278921	ATACpk_peak_74	32	.	3.18916	5.49317	3.23067	336
chr1	18478766	18479274	ATACpk_peak_75	38	.	3.37675	6.11872	3.81342	975
chr1	18478970	18479532	ATACpk_peak_75	38	.	3.37675	6.11872	3.81342	975
chr1	18537367	18538176	ATACpk_peak_76	116	.	5.44033	14.3002	11.646	603
chr1	18537362	18538176	ATACpk_peak_76	116	.	5.44033	14.3002	11.646	603
chr1	18537362	18538176	ATACpk_peak_76	116	.	5.44033	14.3002	11.646	603
chr1	18537367	18538176	ATACpk_peak_76	116	.	5.44033	14.3002	11.646	603
chr1	18537362	18538176	ATACpk_peak_76	116	.	5.44033	14.3002	11.646	603
chr1	18537362	18538176	ATACpk_peak_76	116	.	5.44033	14.3002	11.646	603
chr1	18537367	18538176	ATACpk_peak_76	116	.	5.44033	14.3002	11.646	603
chr1	18537362	18538176	ATACpk_peak_76	116	.	5.44033	14.3002	11.646	603
chr1	18537362	18538176	ATACpk_peak_76	116	.	5.44033	14.3002	11.646	603
chr1	20432762	20433054	ATACpk_peak_79	100	.	5.06513	12.6585	10.057	316
chr1	20432762	20433054	ATACpk_peak_79	100	.	5.06513	12.6585	10.057	316
chr1	20432762	20433054	ATACpk_peak_79	100	.	5.06513	12.6585	10.057	316
chr1	20432528	20433266	ATACpk_peak_79	100	.	5.06513	12.6585	10.057	316
chr1	20432525	20433266	ATACpk_peak_79	100	.	5.06513	12.6585	10.057	316
chr1	20432542	20433266	ATACpk_peak_79	100	.	5.06513	12.6585	10.057	316
chr1	20432528	20433125	ATACpk_peak_79	100	.	5.06513	12.6585	10.057	316
chr1	20432525	20433125	ATACpk_peak_79	100	.	5.06513	12.6585	10.057	316
chr1	20432542	20433125	ATACpk_peak_79	100	.	5.06513	12.6585	10.057	316
chr1	20487002	20487307	ATACpk_peak_80	26	.	3.00156	4.89156	2.67543	184
chr1	20486834	20487327	ATACpk_peak_80	26	.	3.00156	4.89156	2.67543	184
chr1	20486834	20487327	ATACpk_peak_80	26	.	3.00156	4.89156	2.67543	184
chr1	20487002	20487234	ATACpk_peak_80	26	.	3.00156	4.89156	2.67543	184
chr1	20486750	20487234	ATACpk_peak_80	26	.	3.00156	4.89156	2.67543	184
chr1	20486730	20487234	ATACpk_peak_80	26	.	3.00156	4.89156	2.67543	184
chr1	20819949	20820514	ATACpk_peak_81	378	.	10.5055	41.0519	37.8028	374
chr1	20819949	20820514	ATACpk_peak_81	378	.	10.5055	41.0519	37.8028	374
chr1	20819949	20820514	ATACpk_peak_81	378	.	10.5055	41.0519	37.8028	374
chr1	20819949	20820514	ATACpk_peak_81	378	.	10.5055	41.0519	37.8028	374
chr1	20819949	20820514	ATACpk_peak_81	378	.	10.5055	41.0519	37.8028	374
chr1	20819949	20820514	ATACpk_peak_81	378	.	10.5055	41.0519	37.8028	374
chr1	20819949	20820514	ATACpk_peak_81	378	.	10.5055	41.0519	37.8028	374
chr1	20819949	20820514	ATACpk_peak_81	378	.	10.5055	41.0519	37.8028	374
chr1	20819949	20820514	ATACpk_peak_81	378	.	10.5055	41.0519	37.8028	374
chr1	20868356	20868922	ATACpk_peak_82	44	.	3.56435	6.76701	4.42147	76
chr1	20868356	20868922	ATACpk_peak_82	44	.	3.56435	6.76701	4.42147	76
chr1	20868356	20868922	ATACpk_peak_82	44	.	3.56435	6.76701	4.42147	76
chr1	20868356	20868922	ATACpk_peak_82	44	.	3.56435	6.76701	4.42147	76
chr1	20868356	20868922	ATACpk_peak_82	44	.	3.56435	6.76701	4.42147	76
chr1	20868356	20868922	ATACpk_peak_82	44	.	3.56435	6.76701	4.42147	76
chr1	20868428	20868922	ATACpk_peak_82	44	.	3.56435	6.76701	4.42147	76
chr1	20868428	20868922	ATACpk_peak_82	44	.	3.56435	6.76701	4.42147	76
chr1	20868428	20868922	ATACpk_peak_82	44	.	3.56435	6.76701	4.42147	76
chr1	20917558	20917885	ATACpk_peak_83	70	.	4.31474	9.56711	7.0808	267
chr1	20917558	20917885	ATACpk_peak_83	70	.	4.31474	9.56711	7.0808	267
chr1	20917558	20917885	ATACpk_peak_83	70	.	4.31474	9.56711	7.0808	267
chr1	20917558	20917897	ATACpk_peak_83	70	.	4.31474	9.56711	7.0808	267
chr1	20917558	20917897	ATACpk_peak_83	70	.	4.31474	9.56711	7.0808	267
chr1	20917558	20917897	ATACpk_peak_83	70	.	4.31474	9.56711	7.0808	267
chr1	20934721	20934962	ATACpk_peak_84	32	.	3.18916	5.49317	3.23067	69
chr1	20934721	20934962	ATACpk_peak_84	32	.	3.18916	5.49317	3.23067	69
chr1	20934721	20934962	ATACpk_peak_84	32	.	3.18916	5.49317	3.23067	69
chr1	20934656	20934962	ATACpk_peak_84	32	.	3.18916	5.49317	3.23067	69
chr1	20934656	20934962	ATACpk_peak_84	32	.	3.18916	5.49317	3.23067	69
chr1	20934656	20934962	ATACpk_peak_84	32	.	3.18916	5.49317	3.23067	69
chr1	20951118	20952088	ATACpk_peak_85	292	.	9.00468	32.3804	29.2928	612
chr1	20951118	20952088	ATACpk_peak_85	292	.	9.00468	32.3804	29.2928	612
chr1	20951118	20952088	ATACpk_peak_85	292	.	9.00468	32.3804	29.2928	612
chr1	20951118	20952088	ATACpk_peak_85	292	.	9.00468	32.3804	29.2928	612
chr1	20951118	20952088	ATACpk_peak_85	292	.	9.00468	32.3804	29.2928	612
chr1	20951118	20952088	ATACpk_peak_85	292	.	9.00468	32.3804	29.2928	612
chr1	20951118	20952088	ATACpk_peak_85	292	.	9.00468	32.3804	29.2928	612
chr1	20951118	20952088	ATACpk_peak_85	292	.	9.00468	32.3804	29.2928	612
chr1	20951118	20952088	ATACpk_peak_85	292	.	9.00468	32.3804	29.2928	612
chr1	21078822	21079830	ATACpk_peak_86	367	.	10.3179	39.9396	36.7101	703
chr1	21078822	21079830	ATACpk_peak_86	367	.	10.3179	39.9396	36.7101	703
chr1	21078822	21079830	ATACpk_peak_86	367	.	10.3179	39.9396	36.7101	703
chr1	21078703	21079844	ATACpk_peak_86	367	.	10.3179	39.9396	36.7101	703
chr1	21078703	21079844	ATACpk_peak_86	367	.	10.3179	39.9396	36.7101	703
chr1	21078703	21079844	ATACpk_peak_86	367	.	10.3179	39.9396	36.7101	703
chr1	21078703	21079844	ATACpk_peak_86	367	.	10.3179	39.9396	36.7101	703
chr1	21078703	21079844	ATACpk_peak_86	367	.	10.3179	39.9396	36.7101	703
chr1	21078703	21079844	ATACpk_peak_86	367	.	10.3179	39.9396	36.7101	703
chr1	21218515	21218841	ATACpk_peak_87	57	.	3.93955	8.12754	5.70762	187
chr1	21218515	21218841	ATACpk_peak_87	57	.	3.93955	8.12754	5.70762	187
chr1	21218515	21218841	ATACpk_peak_87	57	.	3.93955	8.12754	5.70762	187
chr1	21218515	21218841	ATACpk_peak_87	57	.	3.93955	8.12754	5.70762	187
chr1	21218515	21218841	ATACpk_peak_87	57	.	3.93955	8.12754	5.70762	187
chr1	21218515	21218841	ATACpk_peak_87	57	.	3.93955	8.12754	5.70762	187
chr1	23101765	23102344	ATACpk_peak_89	141	.	6.00312	16.8707	14.1409	551
chr1	23101765	23102344	ATACpk_peak_89	141	.	6.00312	16.8707	14.1409	551
chr1	23101765	23102344	ATACpk_peak_89	141	.	6.00312	16.8707	14.1409	551
chr1	23101765	23102344	ATACpk_peak_89	141	.	6.00312	16.8707	14.1409	551
chr1	23101765	23102344	ATACpk_peak_89	141	.	6.00312	16.8707	14.1409	551
chr1	23101765	23102344	ATACpk_peak_89	141	.	6.00312	16.8707	14.1409	551
chr1	23101856	23102321	ATACpk_peak_89	141	.	6.00312	16.8707	14.1409	551
chr1	23101856	23102321	ATACpk_peak_89	141	.	6.00312	16.8707	14.1409	551
chr1	23101856	23102321	ATACpk_peak_89	141	.	6.00312	16.8707	14.1409	551
chr1	23255735	23256944	ATACpk_peak_90	538	.	13.1318	57.3737	53.8659	582
chr1	23255735	23256944	ATACpk_peak_90	538	.	13.1318	57.3737	53.8659	582
chr1	23255735	23256944	ATACpk_peak_90	538	.	13.1318	57.3737	53.8659	582
chr1	23255735	23256944	ATACpk_peak_90	538	.	13.1318	57.3737	53.8659	582
chr1	23255735	23256944	ATACpk_peak_90	538	.	13.1318	57.3737	53.8659	582
chr1	23255735	23256944	ATACpk_peak_90	538	.	13.1318	57.3737	53.8659	582
chr1	23255969	23256932	ATACpk_peak_90	538	.	13.1318	57.3737	53.8659	582
chr1	23255969	23256932	ATACpk_peak_90	538	.	13.1318	57.3737	53.8659	582
chr1	23255969	23256932	ATACpk_peak_90	538	.	13.1318	57.3737	53.8659	582
chr1	23556362	23557055	ATACpk_peak_92	141	.	6.00312	16.8707	14.1409	494
chr1	23556477	23557055	ATACpk_peak_92	141	.	6.00312	16.8707	14.1409	494
chr1	23556362	23557055	ATACpk_peak_92	141	.	6.00312	16.8707	14.1409	494
chr1	23556362	23557025	ATACpk_peak_92	141	.	6.00312	16.8707	14.1409	494
chr1	23556477	23557025	ATACpk_peak_92	141	.	6.00312	16.8707	14.1409	494
chr1	23556362	23557025	ATACpk_peak_92	141	.	6.00312	16.8707	14.1409	494
chr1	23556526	23557016	ATACpk_peak_92	141	.	6.00312	16.8707	14.1409	494
chr1	23556526	23557016	ATACpk_peak_92	141	.	6.00312	16.8707	14.1409	494
chr1	23556526	23557016	ATACpk_peak_92	141	.	6.00312	16.8707	14.1409	494
chr1	23762981	23763379	ATACpk_peak_93	32	.	3.18916	5.49317	3.23067	37
chr1	23762981	23763379	ATACpk_peak_93	32	.	3.18916	5.49317	3.23067	37
chr1	23762981	23763379	ATACpk_peak_93	32	.	3.18916	5.49317	3.23067	37
chr1	23921700	23922421	ATACpk_peak_94	77	.	4.50234	10.3145	7.79751	226
chr1	23921700	23922421	ATACpk_peak_94	77	.	4.50234	10.3145	7.79751	226
chr1	23921700	23922421	ATACpk_peak_94	77	.	4.50234	10.3145	7.79751	226
chr1	23921700	23922421	ATACpk_peak_94	77	.	4.50234	10.3145	7.79751	226
chr1	23921700	23922421	ATACpk_peak_94	77	.	4.50234	10.3145	7.79751	226
chr1	23921700	23922421	ATACpk_peak_94	77	.	4.50234	10.3145	7.79751	226
chr1	23921700	23922421	ATACpk_peak_94	77	.	4.50234	10.3145	7.79751	226
chr1	23921700	23922421	ATACpk_peak_94	77	.	4.50234	10.3145	7.79751	226
chr1	23921700	23922421	ATACpk_peak_94	77	.	4.50234	10.3145	7.79751	226
chr1	24005393	24006266	ATACpk_peak_95	223	.	7.6915	25.2597	22.3218	265
chr1	24005393	24006266	ATACpk_peak_95	223	.	7.6915	25.2597	22.3218	265
chr1	24005393	24006266	ATACpk_peak_95	223	.	7.6915	25.2597	22.3218	265
chr1	24005393	24006266	ATACpk_peak_95	223	.	7.6915	25.2597	22.3218	265
chr1	24005393	24006266	ATACpk_peak_95	223	.	7.6915	25.2597	22.3218	265
chr1	24005393	24006266	ATACpk_peak_95	223	.	7.6915	25.2597	22.3218	265
chr1	24005393	24006242	ATACpk_peak_95	223	.	7.6915	25.2597	22.3218	265
chr1	24005393	24006242	ATACpk_peak_95	223	.	7.6915	25.2597	22.3218	265
chr1	24005393	24006242	ATACpk_peak_95	223	.	7.6915	25.2597	22.3218	265
chr1	24045391	24045743	ATACpk_peak_96	32	.	3.18916	5.49317	3.23067	65
chr1	24045391	24045743	ATACpk_peak_96	32	.	3.18916	5.49317	3.23067	65
chr1	24045391	24045743	ATACpk_peak_96	32	.	3.18916	5.49317	3.23067	65
chr1	24045362	24045743	ATACpk_peak_96	32	.	3.18916	5.49317	3.23067	65
chr1	24045362	24045743	ATACpk_peak_96	32	.	3.18916	5.49317	3.23067	65
chr1	24045362	24045743	ATACpk_peak_96	32	.	3.18916	5.49317	3.23067	65
chr1	24099691	24101303	ATACpk_peak_97	776	.	16.6962	81.4246	77.6181	620
chr1	24099691	24101303	ATACpk_peak_97	776	.	16.6962	81.4246	77.6181	620
chr1	24099691	24101303	ATACpk_peak_97	776	.	16.6962	81.4246	77.6181	620
chr1	24099691	24101303	ATACpk_peak_97	776	.	16.6962	81.4246	77.6181	620
chr1	24099691	24101303	ATACpk_peak_97	776	.	16.6962	81.4246	77.6181	620
chr1	24099691	24101303	ATACpk_peak_97	776	.	16.6962	81.4246	77.6181	620
chr1	24099691	24101011	ATACpk_peak_97	776	.	16.6962	81.4246	77.6181	620
chr1	24099691	24101011	ATACpk_peak_97	776	.	16.6962	81.4246	77.6181	620
chr1	24099691	24101011	ATACpk_peak_97	776	.	16.6962	81.4246	77.6181	620
chr1	24678273	24679606	ATACpk_peak_99	562	.	13.507	59.81	56.2679	427
chr1	24678273	24679606	ATACpk_peak_99	562	.	13.507	59.81	56.2679	427
chr1	24678273	24679606	ATACpk_peak_99	562	.	13.507	59.81	56.2679	427
chr1	24678273	24679648	ATACpk_peak_99	562	.	13.507	59.81	56.2679	427
chr1	24678273	24679648	ATACpk_peak_99	562	.	13.507	59.81	56.2679	427
chr1	24678273	24679648	ATACpk_peak_99	562	.	13.507	59.81	56.2679	427
chr1	24678303	24679648	ATACpk_peak_99	562	.	13.507	59.81	56.2679	427
chr1	24678303	24679648	ATACpk_peak_99	562	.	13.507	59.81	56.2679	427
chr1	24678303	24679648	ATACpk_peak_99	562	.	13.507	59.81	56.2679	427
chr1	25662258	25663039	ATACpk_peak_100	70	.	4.31474	9.56711	7.0808	706
chr1	25662197	25663039	ATACpk_peak_100	70	.	4.31474	9.56711	7.0808	706
chr1	25662197	25663039	ATACpk_peak_100	70	.	4.31474	9.56711	7.0808	706
chr1	25662552	25662935	ATACpk_peak_100	70	.	4.31474	9.56711	7.0808	706
chr1	25662552	25662935	ATACpk_peak_100	70	.	4.31474	9.56711	7.0808	706
chr1	25662552	25662935	ATACpk_peak_100	70	.	4.31474	9.56711	7.0808	706
chr1	26616703	26616921	ATACpk_peak_102	38	.	3.37675	6.11872	3.81342	44
chr1	26616703	26616921	ATACpk_peak_102	38	.	3.37675	6.11872	3.81342	44
chr1	26616703	26616921	ATACpk_peak_102	38	.	3.37675	6.11872	3.81342	44
chr1	28288082	28288796	ATACpk_peak_104	63	.	4.12714	8.83787	6.38376	256
chr1	28288082	28288796	ATACpk_peak_104	63	.	4.12714	8.83787	6.38376	256
chr1	28288082	28288585	ATACpk_peak_104	63	.	4.12714	8.83787	6.38376	256
chr1	28288328	28288643	ATACpk_peak_104	63	.	4.12714	8.83787	6.38376	256
chr1	28288328	28288643	ATACpk_peak_104	63	.	4.12714	8.83787	6.38376	256
chr1	28288328	28288585	ATACpk_peak_104	63	.	4.12714	8.83787	6.38376	256
chr1	28288159	28288688	ATACpk_peak_104	63	.	4.12714	8.83787	6.38376	256
chr1	28288159	28288688	ATACpk_peak_104	63	.	4.12714	8.83787	6.38376	256
chr1	28288159	28288585	ATACpk_peak_104	63	.	4.12714	8.83787	6.38376	256
chr1	30042472	30043073	ATACpk_peak_105	85	.	4.68994	11.0793	8.53295	647
chr1	30042140	30043073	ATACpk_peak_105	85	.	4.68994	11.0793	8.53295	647
chr1	30042140	30043073	ATACpk_peak_105	85	.	4.68994	11.0793	8.53295	647
chr1	30042509	30043025	ATACpk_peak_105	85	.	4.68994	11.0793	8.53295	647
chr1	30042509	30043025	ATACpk_peak_105	85	.	4.68994	11.0793	8.53295	647
chr1	30042509	30043025	ATACpk_peak_105	85	.	4.68994	11.0793	8.53295	647
chr1	30371147	30371454	ATACpk_peak_107	63	.	4.12714	8.83787	6.38376	248
chr1	30371147	30371461	ATACpk_peak_107	63	.	4.12714	8.83787	6.38376	248
chr1	30371147	30371454	ATACpk_peak_107	63	.	4.12714	8.83787	6.38376	248
chr1	30371045	30371461	ATACpk_peak_107	63	.	4.12714	8.83787	6.38376	248
chr1	30873173	30874236	ATACpk_peak_108	292	.	9.00468	32.3804	29.2928	324
chr1	30873173	30874236	ATACpk_peak_108	292	.	9.00468	32.3804	29.2928	324
chr1	30873173	30874236	ATACpk_peak_108	292	.	9.00468	32.3804	29.2928	324
chr1	30873173	30874236	ATACpk_peak_108	292	.	9.00468	32.3804	29.2928	324
chr1	30873173	30874236	ATACpk_peak_108	292	.	9.00468	32.3804	29.2928	324
chr1	30873173	30874236	ATACpk_peak_108	292	.	9.00468	32.3804	29.2928	324
chr1	30873185	30874226	ATACpk_peak_108	292	.	9.00468	32.3804	29.2928	324
chr1	30873185	30874226	ATACpk_peak_108	292	.	9.00468	32.3804	29.2928	324
chr1	30873185	30874226	ATACpk_peak_108	292	.	9.00468	32.3804	29.2928	324
chr1	30949058	30950313	ATACpk_peak_109	868	.	18.0094	90.749	86.847	770
chr1	30949058	30950313	ATACpk_peak_109	868	.	18.0094	90.749	86.847	770
chr1	30949058	30950313	ATACpk_peak_109	868	.	18.0094	90.749	86.847	770
chr1	30949017	30950313	ATACpk_peak_109	868	.	18.0094	90.749	86.847	770
chr1	30949017	30950313	ATACpk_peak_109	868	.	18.0094	90.749	86.847	770
chr1	30949017	30950313	ATACpk_peak_109	868	.	18.0094	90.749	86.847	770
chr1	30949017	30950313	ATACpk_peak_109	868	.	18.0094	90.749	86.847	770
chr1	30949017	30950313	ATACpk_peak_109	868	.	18.0094	90.749	86.847	770
chr1	30949017	30950313	ATACpk_peak_109	868	.	18.0094	90.749	86.847	770
chr1	31075312	31075668	ATACpk_peak_110	57	.	3.93955	8.12754	5.70762	290
chr1	31075312	31075668	ATACpk_peak_110	57	.	3.93955	8.12754	5.70762	290
chr1	31075312	31075668	ATACpk_peak_110	57	.	3.93955	8.12754	5.70762	290
chr1	31075312	31075668	ATACpk_peak_110	57	.	3.93955	8.12754	5.70762	290
chr1	31075312	31075668	ATACpk_peak_110	57	.	3.93955	8.12754	5.70762	290
chr1	31075312	31075668	ATACpk_peak_110	57	.	3.93955	8.12754	5.70762	290
chr1	31150479	31150985	ATACpk_peak_111	44	.	3.56435	6.76701	4.42147	229
chr1	31150479	31150985	ATACpk_peak_111	44	.	3.56435	6.76701	4.42147	229
chr1	31150479	31150985	ATACpk_peak_111	44	.	3.56435	6.76701	4.42147	229
chr1	31150758	31150985	ATACpk_peak_111	44	.	3.56435	6.76701	4.42147	229
chr1	31150758	31150985	ATACpk_peak_111	44	.	3.56435	6.76701	4.42147	229
chr1	31150758	31150985	ATACpk_peak_111	44	.	3.56435	6.76701	4.42147	229
chr1	31222467	31223046	ATACpk_peak_112	141	.	6.00312	16.8707	14.1409	266
chr1	31222467	31223046	ATACpk_peak_112	141	.	6.00312	16.8707	14.1409	266
chr1	31222467	31223046	ATACpk_peak_112	141	.	6.00312	16.8707	14.1409	266
chr1	31222467	31223196	ATACpk_peak_112	141	.	6.00312	16.8707	14.1409	266
chr1	31222467	31223196	ATACpk_peak_112	141	.	6.00312	16.8707	14.1409	266
chr1	31222467	31223196	ATACpk_peak_112	141	.	6.00312	16.8707	14.1409	266
chr1	31222467	31223196	ATACpk_peak_112	141	.	6.00312	16.8707	14.1409	266
chr1	31222467	31223196	ATACpk_peak_112	141	.	6.00312	16.8707	14.1409	266
chr1	31222467	31223196	ATACpk_peak_112	141	.	6.00312	16.8707	14.1409	266
chr1	31959204	31959335	ATACpk_peak_113	108	.	5.25273	13.4718	10.8435	921
chr1	31958508	31959335	ATACpk_peak_113	108	.	5.25273	13.4718	10.8435	921
chr1	31958763	31959335	ATACpk_peak_113	108	.	5.25273	13.4718	10.8435	921
chr1	31959722	31960284	ATACpk_peak_113	108	.	5.25273	13.4718	10.8435	921
chr1	31959722	31960284	ATACpk_peak_113	108	.	5.25273	13.4718	10.8435	921
chr1	31959722	31960284	ATACpk_peak_113	108	.	5.25273	13.4718	10.8435	921
chr1	31959204	31960338	ATACpk_peak_113	108	.	5.25273	13.4718	10.8435	921
chr1	31958590	31960338	ATACpk_peak_113	108	.	5.25273	13.4718	10.8435	921
chr1	31958763	31960338	ATACpk_peak_113	108	.	5.25273	13.4718	10.8435	921
chr1	31959204	31960338	ATACpk_peak_113	108	.	5.25273	13.4718	10.8435	921
chr1	31958523	31960338	ATACpk_peak_113	108	.	5.25273	13.4718	10.8435	921
chr1	31958763	31960338	ATACpk_peak_113	108	.	5.25273	13.4718	10.8435	921
chr1	31961124	31962908	ATACpk_peak_114	141	.	6.00312	16.8707	14.1409	1735
chr1	31961124	31962908	ATACpk_peak_114	141	.	6.00312	16.8707	14.1409	1735
chr1	31961124	31962908	ATACpk_peak_114	141	.	6.00312	16.8707	14.1409	1735
chr1	31961022	31963305	ATACpk_peak_114	141	.	6.00312	16.8707	14.1409	1735
chr1	31961022	31963912	ATACpk_peak_114	141	.	6.00312	16.8707	14.1409	1735
chr1	31961022	31963912	ATACpk_peak_114	141	.	6.00312	16.8707	14.1409	1735
chr1	31963786	31963912	ATACpk_peak_114	141	.	6.00312	16.8707	14.1409	1735
chr1	31961022	31961619	ATACpk_peak_114	141	.	6.00312	16.8707	14.1409	1735
chr1	31961022	31961619	ATACpk_peak_114	141	.	6.00312	16.8707	14.1409	1735
chr1	31961022	31961619	ATACpk_peak_114	141	.	6.00312	16.8707	14.1409	1735
chr1	31962417	31962767	ATACpk_peak_114	141	.	6.00312	16.8707	14.1409	1735
chr1	31962417	31962767	ATACpk_peak_114	141	.	6.00312	16.8707	14.1409	1735
chr1	31962417	31962767	ATACpk_peak_114	141	.	6.00312	16.8707	14.1409	1735
chr1	31963893	31964637	ATACpk_peak_114	141	.	6.00312	16.8707	14.1409	1735
chr1	31963893	31964054	ATACpk_peak_114	141	.	6.00312	16.8707	14.1409	1735
chr1	31963893	31964637	ATACpk_peak_114	141	.	6.00312	16.8707	14.1409	1735
chr1	32073444	32074232	ATACpk_peak_115	92	.	4.87753	11.8608	9.28651	442
chr1	32073444	32074232	ATACpk_peak_115	92	.	4.87753	11.8608	9.28651	442
chr1	32073444	32074232	ATACpk_peak_115	92	.	4.87753	11.8608	9.28651	442
chr1	32073444	32074232	ATACpk_peak_115	92	.	4.87753	11.8608	9.28651	442
chr1	32073444	32074232	ATACpk_peak_115	92	.	4.87753	11.8608	9.28651	442
chr1	32073444	32074232	ATACpk_peak_115	92	.	4.87753	11.8608	9.28651	442
chr1	32073444	32074266	ATACpk_peak_115	92	.	4.87753	11.8608	9.28651	442
chr1	32073444	32074266	ATACpk_peak_115	92	.	4.87753	11.8608	9.28651	442
chr1	32073444	32074251	ATACpk_peak_115	92	.	4.87753	11.8608	9.28651	442
chr1	32172559	32172966	ATACpk_peak_116	158	.	6.37831	18.6513	15.8732	123
chr1	32172559	32172966	ATACpk_peak_116	158	.	6.37831	18.6513	15.8732	123
chr1	32172559	32172966	ATACpk_peak_116	158	.	6.37831	18.6513	15.8732	123
chr1	32172559	32172966	ATACpk_peak_116	158	.	6.37831	18.6513	15.8732	123
chr1	32172559	32172966	ATACpk_peak_116	158	.	6.37831	18.6513	15.8732	123
chr1	32172559	32172966	ATACpk_peak_116	158	.	6.37831	18.6513	15.8732	123
chr1	32172559	32172816	ATACpk_peak_116	158	.	6.37831	18.6513	15.8732	123
chr1	32172559	32172816	ATACpk_peak_116	158	.	6.37831	18.6513	15.8732	123
chr1	32172559	32172816	ATACpk_peak_116	158	.	6.37831	18.6513	15.8732	123
chr1	32636251	32636560	ATACpk_peak_117	57	.	3.93955	8.12754	5.70762	75
chr1	32636251	32636560	ATACpk_peak_117	57	.	3.93955	8.12754	5.70762	75
chr1	32636251	32636560	ATACpk_peak_117	57	.	3.93955	8.12754	5.70762	75
chr1	33407798	33408646	ATACpk_peak_118	77	.	4.50234	10.3145	7.79751	451
chr1	33407798	33408646	ATACpk_peak_118	77	.	4.50234	10.3145	7.79751	451
chr1	33407798	33408646	ATACpk_peak_118	77	.	4.50234	10.3145	7.79751	451
chr1	33407657	33408707	ATACpk_peak_118	77	.	4.50234	10.3145	7.79751	451
chr1	33407657	33408707	ATACpk_peak_118	77	.	4.50234	10.3145	7.79751	451
chr1	33407657	33408707	ATACpk_peak_118	77	.	4.50234	10.3145	7.79751	451
chr1	33407657	33408622	ATACpk_peak_118	77	.	4.50234	10.3145	7.79751	451
chr1	33407657	33408622	ATACpk_peak_118	77	.	4.50234	10.3145	7.79751	451
chr1	33407657	33408622	ATACpk_peak_118	77	.	4.50234	10.3145	7.79751	451
chr1	33567589	33570793	ATACpk_peak_119	292	.	9.00468	32.3804	29.2928	1024
chr1	33567589	33570793	ATACpk_peak_119	292	.	9.00468	32.3804	29.2928	1024
chr1	33567589	33570793	ATACpk_peak_119	292	.	9.00468	32.3804	29.2928	1024
chr1	33567589	33570793	ATACpk_peak_119	292	.	9.00468	32.3804	29.2928	1024
chr1	33567589	33570793	ATACpk_peak_119	292	.	9.00468	32.3804	29.2928	1024
chr1	33567589	33570793	ATACpk_peak_119	292	.	9.00468	32.3804	29.2928	1024
chr1	33567589	33570793	ATACpk_peak_119	292	.	9.00468	32.3804	29.2928	1024
chr1	33567589	33570793	ATACpk_peak_119	292	.	9.00468	32.3804	29.2928	1024
chr1	33567589	33570793	ATACpk_peak_119	292	.	9.00468	32.3804	29.2928	1024
chr1	33617011	33617316	ATACpk_peak_120	44	.	3.56435	6.76701	4.42147	38
chr1	33617011	33617316	ATACpk_peak_120	44	.	3.56435	6.76701	4.42147	38
chr1	33617011	33617316	ATACpk_peak_120	44	.	3.56435	6.76701	4.42147	38
chr1	33617011	33617251	ATACpk_peak_120	44	.	3.56435	6.76701	4.42147	38
chr1	33617011	33617251	ATACpk_peak_120	44	.	3.56435	6.76701	4.42147	38
chr1	33617011	33617251	ATACpk_peak_120	44	.	3.56435	6.76701	4.42147	38
chr1	33669566	33670500	ATACpk_peak_121	213	.	7.5039	24.2823	21.367	317
chr1	33669566	33670500	ATACpk_peak_121	213	.	7.5039	24.2823	21.367	317
chr1	33669566	33670500	ATACpk_peak_121	213	.	7.5039	24.2823	21.367	317
chr1	33669557	33670500	ATACpk_peak_121	213	.	7.5039	24.2823	21.367	317
chr1	33669557	33670500	ATACpk_peak_121	213	.	7.5039	24.2823	21.367	317
chr1	33669557	33670500	ATACpk_peak_121	213	.	7.5039	24.2823	21.367	317
chr1	33669557	33670496	ATACpk_peak_121	213	.	7.5039	24.2823	21.367	317
chr1	33669557	33670496	ATACpk_peak_121	213	.	7.5039	24.2823	21.367	317
chr1	33669557	33670496	ATACpk_peak_121	213	.	7.5039	24.2823	21.367	317
chr1	33719787	33720445	ATACpk_peak_122	367	.	10.3179	39.9396	36.7101	386
chr1	33719787	33720445	ATACpk_peak_122	367	.	10.3179	39.9396	36.7101	386
chr1	33719787	33720445	ATACpk_peak_122	367	.	10.3179	39.9396	36.7101	386
chr1	33719787	33720528	ATACpk_peak_122	367	.	10.3179	39.9396	36.7101	386
chr1	33719787	33720528	ATACpk_peak_122	367	.	10.3179	39.9396	36.7101	386
chr1	33719787	33720528	ATACpk_peak_122	367	.	10.3179	39.9396	36.7101	386
chr1	33719787	33720754	ATACpk_peak_122	367	.	10.3179	39.9396	36.7101	386
chr1	33719787	33720754	ATACpk_peak_122	367	.	10.3179	39.9396	36.7101	386
chr1	33719787	33720754	ATACpk_peak_122	367	.	10.3179	39.9396	36.7101	386
chr1	33757336	33757993	ATACpk_peak_123	176	.	6.75351	20.4818	17.6567	296
chr1	33757336	33757993	ATACpk_peak_123	176	.	6.75351	20.4818	17.6567	296
chr1	33757336	33757993	ATACpk_peak_123	176	.	6.75351	20.4818	17.6567	296
chr1	33757457	33757993	ATACpk_peak_123	176	.	6.75351	20.4818	17.6567	296
chr1	33757457	33757993	ATACpk_peak_123	176	.	6.75351	20.4818	17.6567	296
chr1	33757457	33757993	ATACpk_peak_123	176	.	6.75351	20.4818	17.6567	296
chr1	33757432	33757993	ATACpk_peak_123	176	.	6.75351	20.4818	17.6567	296
chr1	33757432	33757993	ATACpk_peak_123	176	.	6.75351	20.4818	17.6567	296
chr1	33757432	33757993	ATACpk_peak_123	176	.	6.75351	20.4818	17.6567	296
chr1	33813992	33814670	ATACpk_peak_124	194	.	7.1287	22.3596	19.4893	523
chr1	33813992	33814670	ATACpk_peak_124	194	.	7.1287	22.3596	19.4893	523
chr1	33813992	33814670	ATACpk_peak_124	194	.	7.1287	22.3596	19.4893	523
chr1	33813992	33814670	ATACpk_peak_124	194	.	7.1287	22.3596	19.4893	523
chr1	33813992	33814670	ATACpk_peak_124	194	.	7.1287	22.3596	19.4893	523
chr1	33813992	33814670	ATACpk_peak_124	194	.	7.1287	22.3596	19.4893	523
chr1	33814093	33814667	ATACpk_peak_124	194	.	7.1287	22.3596	19.4893	523
chr1	33814093	33814667	ATACpk_peak_124	194	.	7.1287	22.3596	19.4893	523
chr1	33814093	33814667	ATACpk_peak_124	194	.	7.1287	22.3596	19.4893	523
chr1	33829065	33829358	ATACpk_peak_125	38	.	3.37675	6.11872	3.81342	764
chr1	33829065	33829358	ATACpk_peak_125	38	.	3.37675	6.11872	3.81342	764
chr1	33829065	33829358	ATACpk_peak_125	38	.	3.37675	6.11872	3.81342	764
chr1	33838389	33839210	ATACpk_peak_126	77	.	4.50234	10.3145	7.79751	790
chr1	33838320	33839210	ATACpk_peak_126	77	.	4.50234	10.3145	7.79751	790
chr1	33838320	33839210	ATACpk_peak_126	77	.	4.50234	10.3145	7.79751	790
chr1	33838603	33839207	ATACpk_peak_126	77	.	4.50234	10.3145	7.79751	790
chr1	33838603	33839207	ATACpk_peak_126	77	.	4.50234	10.3145	7.79751	790
chr1	33838603	33839207	ATACpk_peak_126	77	.	4.50234	10.3145	7.79751	790
chr1	33838389	33839182	ATACpk_peak_126	77	.	4.50234	10.3145	7.79751	790
chr1	33838320	33839182	ATACpk_peak_126	77	.	4.50234	10.3145	7.79751	790
chr1	33838320	33839182	ATACpk_peak_126	77	.	4.50234	10.3145	7.79751	790
chr1	33903140	33903781	ATACpk_peak_127	108	.	5.25273	13.4718	10.8435	765
chr1	33903140	33903781	ATACpk_peak_127	108	.	5.25273	13.4718	10.8435	765
chr1	33903140	33903781	ATACpk_peak_127	108	.	5.25273	13.4718	10.8435	765
chr1	33902961	33903781	ATACpk_peak_127	108	.	5.25273	13.4718	10.8435	765
chr1	33902961	33903781	ATACpk_peak_127	108	.	5.25273	13.4718	10.8435	765
chr1	33902961	33903781	ATACpk_peak_127	108	.	5.25273	13.4718	10.8435	765
chr1	33944827	33945485	ATACpk_peak_128	50	.	3.75195	7.43695	5.05349	329
chr1	33944827	33945485	ATACpk_peak_128	50	.	3.75195	7.43695	5.05349	329
chr1	33944827	33945485	ATACpk_peak_128	50	.	3.75195	7.43695	5.05349	329
chr1	33944827	33945485	ATACpk_peak_128	50	.	3.75195	7.43695	5.05349	329
chr1	33944827	33945485	ATACpk_peak_128	50	.	3.75195	7.43695	5.05349	329
chr1	33944827	33945485	ATACpk_peak_128	50	.	3.75195	7.43695	5.05349	329
chr1	33945103	33945485	ATACpk_peak_128	50	.	3.75195	7.43695	5.05349	329
chr1	33945103	33945485	ATACpk_peak_128	50	.	3.75195	7.43695	5.05349	329
chr1	33945103	33945485	ATACpk_peak_128	50	.	3.75195	7.43695	5.05349	329
chr1	34215118	34215829	ATACpk_peak_129	38	.	3.37675	6.11872	3.81342	150
chr1	34215118	34215829	ATACpk_peak_129	38	.	3.37675	6.11872	3.81342	150
chr1	34215118	34215829	ATACpk_peak_129	38	.	3.37675	6.11872	3.81342	150
chr1	34230436	34230690	ATACpk_peak_130	38	.	3.37675	6.11872	3.81342	84
chr1	34230436	34230690	ATACpk_peak_130	38	.	3.37675	6.11872	3.81342	84
chr1	34438989	34440215	ATACpk_peak_131	1004	.	19.8853	104.448	100.424	716
chr1	34438989	34440215	ATACpk_peak_131	1004	.	19.8853	104.448	100.424	716
chr1	34438989	34440215	ATACpk_peak_131	1004	.	19.8853	104.448	100.424	716
chr1	34438989	34440205	ATACpk_peak_131	1004	.	19.8853	104.448	100.424	716
chr1	34438989	34440205	ATACpk_peak_131	1004	.	19.8853	104.448	100.424	716
chr1	34438989	34440205	ATACpk_peak_131	1004	.	19.8853	104.448	100.424	716
chr1	34438989	34440197	ATACpk_peak_131	1004	.	19.8853	104.448	100.424	716
chr1	34438989	34440197	ATACpk_peak_131	1004	.	19.8853	104.448	100.424	716
chr1	34438989	34440197	ATACpk_peak_131	1004	.	19.8853	104.448	100.424	716
chr1	34459107	34459705	ATACpk_peak_132	77	.	4.50234	10.3145	7.79751	879
chr1	34459107	34459705	ATACpk_peak_132	77	.	4.50234	10.3145	7.79751	879
chr1	34459107	34459705	ATACpk_peak_132	77	.	4.50234	10.3145	7.79751	879
chr1	34459263	34459705	ATACpk_peak_132	77	.	4.50234	10.3145	7.79751	879
chr1	34459263	34459705	ATACpk_peak_132	77	.	4.50234	10.3145	7.79751	879
chr1	34459263	34459705	ATACpk_peak_132	77	.	4.50234	10.3145	7.79751	879
chr1	34459609	34459705	ATACpk_peak_132	77	.	4.50234	10.3145	7.79751	879
chr1	34459609	34459705	ATACpk_peak_132	77	.	4.50234	10.3145	7.79751	879
chr1	34459609	34459705	ATACpk_peak_132	77	.	4.50234	10.3145	7.79751	879
chr1	34485281	34485745	ATACpk_peak_133	38	.	3.37675	6.11872	3.81342	836
chr1	34485460	34485745	ATACpk_peak_133	38	.	3.37675	6.11872	3.81342	836
chr1	34485281	34485745	ATACpk_peak_133	38	.	3.37675	6.11872	3.81342	836
chr1	34498231	34499304	ATACpk_peak_134	77	.	4.50234	10.3145	7.79751	852
chr1	34498231	34499304	ATACpk_peak_134	77	.	4.50234	10.3145	7.79751	852
chr1	34498231	34499304	ATACpk_peak_134	77	.	4.50234	10.3145	7.79751	852
chr1	34498024	34499498	ATACpk_peak_134	77	.	4.50234	10.3145	7.79751	852
chr1	34498024	34499498	ATACpk_peak_134	77	.	4.50234	10.3145	7.79751	852
chr1	34498024	34499498	ATACpk_peak_134	77	.	4.50234	10.3145	7.79751	852
chr1	34498278	34499569	ATACpk_peak_134	77	.	4.50234	10.3145	7.79751	852
chr1	34498278	34499569	ATACpk_peak_134	77	.	4.50234	10.3145	7.79751	852
chr1	34498278	34499569	ATACpk_peak_134	77	.	4.50234	10.3145	7.79751	852
chr1	34510439	34511208	ATACpk_peak_137	57	.	3.93955	8.12754	5.70762	311
chr1	34510439	34511208	ATACpk_peak_137	57	.	3.93955	8.12754	5.70762	311
chr1	34510439	34511208	ATACpk_peak_137	57	.	3.93955	8.12754	5.70762	311
chr1	34510424	34511208	ATACpk_peak_137	57	.	3.93955	8.12754	5.70762	311
chr1	34510424	34511208	ATACpk_peak_137	57	.	3.93955	8.12754	5.70762	311
chr1	34510424	34511208	ATACpk_peak_137	57	.	3.93955	8.12754	5.70762	311
chr1	34510495	34511208	ATACpk_peak_137	57	.	3.93955	8.12754	5.70762	311
chr1	34510495	34511208	ATACpk_peak_137	57	.	3.93955	8.12754	5.70762	311
chr1	34510495	34511208	ATACpk_peak_137	57	.	3.93955	8.12754	5.70762	311
chr1	34578715	34579788	ATACpk_peak_138	100	.	5.06513	12.6585	10.057	1140
chr1	34578715	34579788	ATACpk_peak_138	100	.	5.06513	12.6585	10.057	1140
chr1	34578715	34579788	ATACpk_peak_138	100	.	5.06513	12.6585	10.057	1140
chr1	34578692	34579788	ATACpk_peak_138	100	.	5.06513	12.6585	10.057	1140
chr1	34578692	34579788	ATACpk_peak_138	100	.	5.06513	12.6585	10.057	1140
chr1	34578692	34579788	ATACpk_peak_138	100	.	5.06513	12.6585	10.057	1140
chr1	34578744	34579788	ATACpk_peak_138	100	.	5.06513	12.6585	10.057	1140
chr1	34578744	34579788	ATACpk_peak_138	100	.	5.06513	12.6585	10.057	1140
chr1	34578744	34579788	ATACpk_peak_138	100	.	5.06513	12.6585	10.057	1140
chr1	34801736	34802149	ATACpk_peak_140	141	.	6.00312	16.8707	14.1409	192
chr1	34801736	34802149	ATACpk_peak_140	141	.	6.00312	16.8707	14.1409	192
chr1	34801736	34802149	ATACpk_peak_140	141	.	6.00312	16.8707	14.1409	192
chr1	34801836	34802149	ATACpk_peak_140	141	.	6.00312	16.8707	14.1409	192
chr1	34801836	34802149	ATACpk_peak_140	141	.	6.00312	16.8707	14.1409	192
chr1	34801836	34802149	ATACpk_peak_140	141	.	6.00312	16.8707	14.1409	192
chr1	34801810	34802149	ATACpk_peak_140	141	.	6.00312	16.8707	14.1409	192
chr1	34801810	34802149	ATACpk_peak_140	141	.	6.00312	16.8707	14.1409	192
chr1	34801810	34802149	ATACpk_peak_140	141	.	6.00312	16.8707	14.1409	192
chr1	34842546	34843117	ATACpk_peak_141	100	.	5.06513	12.6585	10.057	462
chr1	34842546	34843117	ATACpk_peak_141	100	.	5.06513	12.6585	10.057	462
chr1	34842546	34843117	ATACpk_peak_141	100	.	5.06513	12.6585	10.057	462
chr1	34842544	34843117	ATACpk_peak_141	100	.	5.06513	12.6585	10.057	462
chr1	34842531	34843117	ATACpk_peak_141	100	.	5.06513	12.6585	10.057	462
chr1	34842531	34843117	ATACpk_peak_141	100	.	5.06513	12.6585	10.057	462
chr1	34842544	34843011	ATACpk_peak_141	100	.	5.06513	12.6585	10.057	462
chr1	34842520	34843011	ATACpk_peak_141	100	.	5.06513	12.6585	10.057	462
chr1	34842520	34843011	ATACpk_peak_141	100	.	5.06513	12.6585	10.057	462
chr1	34849871	34850694	ATACpk_peak_142	132	.	5.81552	16	13.295	327
chr1	34849871	34850718	ATACpk_peak_142	132	.	5.81552	16	13.295	327
chr1	34849871	34850718	ATACpk_peak_142	132	.	5.81552	16	13.295	327
chr1	34849881	34850694	ATACpk_peak_142	132	.	5.81552	16	13.295	327
chr1	34849881	34850718	ATACpk_peak_142	132	.	5.81552	16	13.295	327
chr1	34849881	34850718	ATACpk_peak_142	132	.	5.81552	16	13.295	327
chr1	34849873	34850578	ATACpk_peak_142	132	.	5.81552	16	13.295	327
chr1	34849873	34850578	ATACpk_peak_142	132	.	5.81552	16	13.295	327
chr1	34849873	34850578	ATACpk_peak_142	132	.	5.81552	16	13.295	327
chr1	35214496	35215074	ATACpk_peak_143	44	.	3.56435	6.76701	4.42147	492
chr1	35214496	35215074	ATACpk_peak_143	44	.	3.56435	6.76701	4.42147	492
chr1	35214496	35215074	ATACpk_peak_143	44	.	3.56435	6.76701	4.42147	492
chr1	35214496	35215074	ATACpk_peak_143	44	.	3.56435	6.76701	4.42147	492
chr1	35214496	35215074	ATACpk_peak_143	44	.	3.56435	6.76701	4.42147	492
chr1	35214496	35215074	ATACpk_peak_143	44	.	3.56435	6.76701	4.42147	492
chr1	35214496	35214973	ATACpk_peak_143	44	.	3.56435	6.76701	4.42147	492
chr1	35214496	35214973	ATACpk_peak_143	44	.	3.56435	6.76701	4.42147	492
chr1	35214496	35214973	ATACpk_peak_143	44	.	3.56435	6.76701	4.42147	492
chr1	35869734	35870012	ATACpk_peak_145	70	.	4.31474	9.56711	7.0808	206
chr1	35869734	35870012	ATACpk_peak_145	70	.	4.31474	9.56711	7.0808	206
chr1	35869734	35870012	ATACpk_peak_145	70	.	4.31474	9.56711	7.0808	206
chr1	36068028	36068462	ATACpk_peak_146	176	.	6.75351	20.4818	17.6567	230
chr1	36068028	36068462	ATACpk_peak_146	176	.	6.75351	20.4818	17.6567	230
chr1	36068028	36068462	ATACpk_peak_146	176	.	6.75351	20.4818	17.6567	230
chr1	36068028	36068462	ATACpk_peak_146	176	.	6.75351	20.4818	17.6567	230
chr1	36068028	36068462	ATACpk_peak_146	176	.	6.75351	20.4818	17.6567	230
chr1	36068028	36068462	ATACpk_peak_146	176	.	6.75351	20.4818	17.6567	230
chr1	36068028	36068462	ATACpk_peak_146	176	.	6.75351	20.4818	17.6567	230
chr1	36068028	36068462	ATACpk_peak_146	176	.	6.75351	20.4818	17.6567	230
chr1	36068028	36068462	ATACpk_peak_146	176	.	6.75351	20.4818	17.6567	230
chr1	36243868	36244427	ATACpk_peak_147	150	.	6.19072	17.7546	15.0004	414
chr1	36243868	36244427	ATACpk_peak_147	150	.	6.19072	17.7546	15.0004	414
chr1	36243868	36244427	ATACpk_peak_147	150	.	6.19072	17.7546	15.0004	414
chr1	36243876	36244427	ATACpk_peak_147	150	.	6.19072	17.7546	15.0004	414
chr1	36243876	36244427	ATACpk_peak_147	150	.	6.19072	17.7546	15.0004	414
chr1	36243876	36244427	ATACpk_peak_147	150	.	6.19072	17.7546	15.0004	414
chr1	36243893	36244427	ATACpk_peak_147	150	.	6.19072	17.7546	15.0004	414
chr1	36243893	36244427	ATACpk_peak_147	150	.	6.19072	17.7546	15.0004	414
chr1	36243893	36244427	ATACpk_peak_147	150	.	6.19072	17.7546	15.0004	414
chr1	36269422	36269710	ATACpk_peak_149	70	.	4.31474	9.56711	7.0808	163
chr1	36269422	36269710	ATACpk_peak_149	70	.	4.31474	9.56711	7.0808	163
chr1	36269422	36269710	ATACpk_peak_149	70	.	4.31474	9.56711	7.0808	163
chr1	36269444	36269710	ATACpk_peak_149	70	.	4.31474	9.56711	7.0808	163
chr1	36269444	36269710	ATACpk_peak_149	70	.	4.31474	9.56711	7.0808	163
chr1	36269444	36269710	ATACpk_peak_149	70	.	4.31474	9.56711	7.0808	163
chr1	36269423	36269710	ATACpk_peak_149	70	.	4.31474	9.56711	7.0808	163
chr1	36269423	36269710	ATACpk_peak_149	70	.	4.31474	9.56711	7.0808	163
chr1	36269423	36269710	ATACpk_peak_149	70	.	4.31474	9.56711	7.0808	163
chr1	36287474	36287852	ATACpk_peak_151	116	.	5.44033	14.3002	11.646	342
chr1	36287474	36287852	ATACpk_peak_151	116	.	5.44033	14.3002	11.646	342
chr1	36287474	36287852	ATACpk_peak_151	116	.	5.44033	14.3002	11.646	342
chr1	36287601	36287852	ATACpk_peak_151	116	.	5.44033	14.3002	11.646	342
chr1	36287601	36287852	ATACpk_peak_151	116	.	5.44033	14.3002	11.646	342
chr1	36287601	36287852	ATACpk_peak_151	116	.	5.44033	14.3002	11.646	342
chr1	36307344	36308715	ATACpk_peak_152	313	.	9.37987	34.4981	31.3698	384
chr1	36307344	36308715	ATACpk_peak_152	313	.	9.37987	34.4981	31.3698	384
chr1	36307344	36308715	ATACpk_peak_152	313	.	9.37987	34.4981	31.3698	384
chr1	36307344	36308180	ATACpk_peak_152	313	.	9.37987	34.4981	31.3698	384
chr1	36307344	36308180	ATACpk_peak_152	313	.	9.37987	34.4981	31.3698	384
chr1	36307344	36308180	ATACpk_peak_152	313	.	9.37987	34.4981	31.3698	384
chr1	36308556	36308715	ATACpk_peak_152	313	.	9.37987	34.4981	31.3698	384
chr1	36308556	36308715	ATACpk_peak_152	313	.	9.37987	34.4981	31.3698	384
chr1	36308556	36308715	ATACpk_peak_152	313	.	9.37987	34.4981	31.3698	384
chr1	36307406	36308133	ATACpk_peak_152	313	.	9.37987	34.4981	31.3698	384
chr1	36307406	36308133	ATACpk_peak_152	313	.	9.37987	34.4981	31.3698	384
chr1	36307406	36308133	ATACpk_peak_152	313	.	9.37987	34.4981	31.3698	384
chr1	36315044	36315402	ATACpk_peak_154	70	.	4.31474	9.56711	7.0808	138
chr1	36315044	36315402	ATACpk_peak_154	70	.	4.31474	9.56711	7.0808	138
chr1	36315044	36315402	ATACpk_peak_154	70	.	4.31474	9.56711	7.0808	138
chr1	36315044	36315402	ATACpk_peak_154	70	.	4.31474	9.56711	7.0808	138
chr1	36315044	36315402	ATACpk_peak_154	70	.	4.31474	9.56711	7.0808	138
chr1	36315044	36315402	ATACpk_peak_154	70	.	4.31474	9.56711	7.0808	138
chr1	36315044	36315402	ATACpk_peak_154	70	.	4.31474	9.56711	7.0808	138
chr1	36315044	36315402	ATACpk_peak_154	70	.	4.31474	9.56711	7.0808	138
chr1	36315044	36315402	ATACpk_peak_154	70	.	4.31474	9.56711	7.0808	138
chr1	36368545	36369370	ATACpk_peak_155	303	.	9.19228	33.4349	30.3268	516
chr1	36368545	36369370	ATACpk_peak_155	303	.	9.19228	33.4349	30.3268	516
chr1	36368545	36369370	ATACpk_peak_155	303	.	9.19228	33.4349	30.3268	516
chr1	36368545	36369370	ATACpk_peak_155	303	.	9.19228	33.4349	30.3268	516
chr1	36368545	36369370	ATACpk_peak_155	303	.	9.19228	33.4349	30.3268	516
chr1	36368545	36369370	ATACpk_peak_155	303	.	9.19228	33.4349	30.3268	516
chr1	36368545	36369370	ATACpk_peak_155	303	.	9.19228	33.4349	30.3268	516
chr1	36368545	36369370	ATACpk_peak_155	303	.	9.19228	33.4349	30.3268	516
chr1	36368545	36369370	ATACpk_peak_155	303	.	9.19228	33.4349	30.3268	516
chr1	36444593	36445655	ATACpk_peak_156	648	.	14.8202	68.5212	64.8654	688
chr1	36444593	36445655	ATACpk_peak_156	648	.	14.8202	68.5212	64.8654	688
chr1	36444593	36445655	ATACpk_peak_156	648	.	14.8202	68.5212	64.8654	688
chr1	36444613	36445655	ATACpk_peak_156	648	.	14.8202	68.5212	64.8654	688
chr1	36444613	36445655	ATACpk_peak_156	648	.	14.8202	68.5212	64.8654	688
chr1	36444613	36445655	ATACpk_peak_156	648	.	14.8202	68.5212	64.8654	688
chr1	36444708	36445505	ATACpk_peak_156	648	.	14.8202	68.5212	64.8654	688
chr1	36444708	36445505	ATACpk_peak_156	648	.	14.8202	68.5212	64.8654	688
chr1	36444708	36445505	ATACpk_peak_156	648	.	14.8202	68.5212	64.8654	688
chr1	36471207	36472469	ATACpk_peak_157	356	.	10.1303	38.8351	35.6252	350
chr1	36471207	36472469	ATACpk_peak_157	356	.	10.1303	38.8351	35.6252	350
chr1	36471207	36472469	ATACpk_peak_157	356	.	10.1303	38.8351	35.6252	350
chr1	36471121	36472383	ATACpk_peak_157	356	.	10.1303	38.8351	35.6252	350
chr1	36471121	36472383	ATACpk_peak_157	356	.	10.1303	38.8351	35.6252	350
chr1	36471121	36472383	ATACpk_peak_157	356	.	10.1303	38.8351	35.6252	350
chr1	36471111	36472292	ATACpk_peak_157	356	.	10.1303	38.8351	35.6252	350
chr1	36471111	36472292	ATACpk_peak_157	356	.	10.1303	38.8351	35.6252	350
chr1	36471111	36472292	ATACpk_peak_157	356	.	10.1303	38.8351	35.6252	350
chr1	36511325	36512920	ATACpk_peak_158	648	.	14.8202	68.5212	64.8654	552
chr1	36511325	36512920	ATACpk_peak_158	648	.	14.8202	68.5212	64.8654	552
chr1	36511325	36512920	ATACpk_peak_158	648	.	14.8202	68.5212	64.8654	552
chr1	36511364	36512920	ATACpk_peak_158	648	.	14.8202	68.5212	64.8654	552
chr1	36511364	36512920	ATACpk_peak_158	648	.	14.8202	68.5212	64.8654	552
chr1	36511364	36512920	ATACpk_peak_158	648	.	14.8202	68.5212	64.8654	552
chr1	36511494	36512920	ATACpk_peak_158	648	.	14.8202	68.5212	64.8654	552
chr1	36511494	36512920	ATACpk_peak_158	648	.	14.8202	68.5212	64.8654	552
chr1	36511494	36512920	ATACpk_peak_158	648	.	14.8202	68.5212	64.8654	552
chr1	36546365	36547808	ATACpk_peak_161	456	.	11.8186	49.0453	45.6633	1246
chr1	36546365	36547808	ATACpk_peak_161	456	.	11.8186	49.0453	45.6633	1246
chr1	36546365	36547808	ATACpk_peak_161	456	.	11.8186	49.0453	45.6633	1246
chr1	36546091	36547816	ATACpk_peak_161	456	.	11.8186	49.0453	45.6633	1246
chr1	36546091	36547816	ATACpk_peak_161	456	.	11.8186	49.0453	45.6633	1246
chr1	36546091	36547816	ATACpk_peak_161	456	.	11.8186	49.0453	45.6633	1246
chr1	36546558	36547816	ATACpk_peak_161	456	.	11.8186	49.0453	45.6633	1246
chr1	36546558	36547816	ATACpk_peak_161	456	.	11.8186	49.0453	45.6633	1246
chr1	36546558	36547816	ATACpk_peak_161	456	.	11.8186	49.0453	45.6633	1246
chr1	36556760	36559320	ATACpk_peak_162	124	.	5.62792	15.1431	12.4635	1417
chr1	36556614	36559320	ATACpk_peak_162	124	.	5.62792	15.1431	12.4635	1417
chr1	36556614	36559320	ATACpk_peak_162	124	.	5.62792	15.1431	12.4635	1417
chr1	36556760	36559320	ATACpk_peak_162	124	.	5.62792	15.1431	12.4635	1417
chr1	36556614	36559320	ATACpk_peak_162	124	.	5.62792	15.1431	12.4635	1417
chr1	36556614	36559320	ATACpk_peak_162	124	.	5.62792	15.1431	12.4635	1417
chr1	36556760	36558896	ATACpk_peak_162	124	.	5.62792	15.1431	12.4635	1417
chr1	36556614	36558896	ATACpk_peak_162	124	.	5.62792	15.1431	12.4635	1417
chr1	36556614	36558896	ATACpk_peak_162	124	.	5.62792	15.1431	12.4635	1417
chr1	36559749	36560125	ATACpk_peak_163	57	.	3.93955	8.12754	5.70762	165
chr1	36559749	36560125	ATACpk_peak_163	57	.	3.93955	8.12754	5.70762	165
chr1	36559876	36560158	ATACpk_peak_163	57	.	3.93955	8.12754	5.70762	165
chr1	36559876	36560158	ATACpk_peak_163	57	.	3.93955	8.12754	5.70762	165
chr1	36586906	36587401	ATACpk_peak_164	26	.	3.00156	4.89156	2.67543	520
chr1	36586906	36587401	ATACpk_peak_164	26	.	3.00156	4.89156	2.67543	520
chr1	36586906	36587401	ATACpk_peak_164	26	.	3.00156	4.89156	2.67543	520
chr1	36588013	36588514	ATACpk_peak_165	26	.	3.00156	4.89156	2.67543	273
chr1	36588013	36588514	ATACpk_peak_165	26	.	3.00156	4.89156	2.67543	273
chr1	36588013	36588514	ATACpk_peak_165	26	.	3.00156	4.89156	2.67543	273
chr1	36588364	36588514	ATACpk_peak_165	26	.	3.00156	4.89156	2.67543	273
chr1	36588364	36588514	ATACpk_peak_165	26	.	3.00156	4.89156	2.67543	273
chr1	36588364	36588514	ATACpk_peak_165	26	.	3.00156	4.89156	2.67543	273
chr1	36588193	36588514	ATACpk_peak_165	26	.	3.00156	4.89156	2.67543	273
chr1	36588193	36588514	ATACpk_peak_165	26	.	3.00156	4.89156	2.67543	273
chr1	36588193	36588514	ATACpk_peak_165	26	.	3.00156	4.89156	2.67543	273
chr1	36589651	36592080	ATACpk_peak_166	57	.	3.93955	8.12754	5.70762	438
chr1	36589651	36592080	ATACpk_peak_166	57	.	3.93955	8.12754	5.70762	438
chr1	36589651	36592080	ATACpk_peak_166	57	.	3.93955	8.12754	5.70762	438
chr1	36589651	36591401	ATACpk_peak_166	57	.	3.93955	8.12754	5.70762	438
chr1	36589651	36591401	ATACpk_peak_166	57	.	3.93955	8.12754	5.70762	438
chr1	36589651	36591401	ATACpk_peak_166	57	.	3.93955	8.12754	5.70762	438
chr1	36589651	36592080	ATACpk_peak_166	57	.	3.93955	8.12754	5.70762	438
chr1	36589651	36592080	ATACpk_peak_166	57	.	3.93955	8.12754	5.70762	438
chr1	36589651	36592080	ATACpk_peak_166	57	.	3.93955	8.12754	5.70762	438
chr1	36592727	36593446	ATACpk_peak_167	70	.	4.31474	9.56711	7.0808	473
chr1	36592727	36593446	ATACpk_peak_167	70	.	4.31474	9.56711	7.0808	473
chr1	36592727	36593446	ATACpk_peak_167	70	.	4.31474	9.56711	7.0808	473
chr1	36592727	36593436	ATACpk_peak_167	70	.	4.31474	9.56711	7.0808	473
chr1	36592727	36593436	ATACpk_peak_167	70	.	4.31474	9.56711	7.0808	473
chr1	36592727	36593436	ATACpk_peak_167	70	.	4.31474	9.56711	7.0808	473
chr1	36610554	36611048	ATACpk_peak_168	63	.	4.12714	8.83787	6.38376	440
chr1	36610554	36611107	ATACpk_peak_168	63	.	4.12714	8.83787	6.38376	440
chr1	36610554	36611107	ATACpk_peak_168	63	.	4.12714	8.83787	6.38376	440
chr1	36610554	36611048	ATACpk_peak_168	63	.	4.12714	8.83787	6.38376	440
chr1	36610554	36611107	ATACpk_peak_168	63	.	4.12714	8.83787	6.38376	440
chr1	36610554	36611107	ATACpk_peak_168	63	.	4.12714	8.83787	6.38376	440
chr1	36610700	36611048	ATACpk_peak_168	63	.	4.12714	8.83787	6.38376	440
chr1	36610700	36611107	ATACpk_peak_168	63	.	4.12714	8.83787	6.38376	440
chr1	36610700	36611107	ATACpk_peak_168	63	.	4.12714	8.83787	6.38376	440
chr1	36619530	36619854	ATACpk_peak_169	57	.	3.93955	8.12754	5.70762	220
chr1	36619530	36619854	ATACpk_peak_169	57	.	3.93955	8.12754	5.70762	220
chr1	36619530	36619854	ATACpk_peak_169	57	.	3.93955	8.12754	5.70762	220
chr1	36619530	36619854	ATACpk_peak_169	57	.	3.93955	8.12754	5.70762	220
chr1	36619530	36619854	ATACpk_peak_169	57	.	3.93955	8.12754	5.70762	220
chr1	36619530	36619854	ATACpk_peak_169	57	.	3.93955	8.12754	5.70762	220
chr1	36619530	36619854	ATACpk_peak_169	57	.	3.93955	8.12754	5.70762	220
chr1	36619530	36619854	ATACpk_peak_169	57	.	3.93955	8.12754	5.70762	220
chr1	36619530	36619854	ATACpk_peak_169	57	.	3.93955	8.12754	5.70762	220
chr1	36679577	36679926	ATACpk_peak_172	38	.	3.37675	6.11872	3.81342	226
chr1	36679630	36679965	ATACpk_peak_172	38	.	3.37675	6.11872	3.81342	226
chr1	36682706	36683305	ATACpk_peak_173	70	.	4.31474	9.56711	7.0808	417
chr1	36682706	36683305	ATACpk_peak_173	70	.	4.31474	9.56711	7.0808	417
chr1	36682706	36683305	ATACpk_peak_173	70	.	4.31474	9.56711	7.0808	417
chr1	36682706	36683305	ATACpk_peak_173	70	.	4.31474	9.56711	7.0808	417
chr1	36682706	36683305	ATACpk_peak_173	70	.	4.31474	9.56711	7.0808	417
chr1	36682706	36683305	ATACpk_peak_173	70	.	4.31474	9.56711	7.0808	417
chr1	36682706	36683305	ATACpk_peak_173	70	.	4.31474	9.56711	7.0808	417
chr1	36682706	36683305	ATACpk_peak_173	70	.	4.31474	9.56711	7.0808	417
chr1	36682706	36683305	ATACpk_peak_173	70	.	4.31474	9.56711	7.0808	417
chr1	36690992	36691913	ATACpk_peak_174	356	.	10.1303	38.8351	35.6252	495
chr1	36690992	36691913	ATACpk_peak_174	356	.	10.1303	38.8351	35.6252	495
chr1	36690992	36691913	ATACpk_peak_174	356	.	10.1303	38.8351	35.6252	495
chr1	36691158	36691913	ATACpk_peak_174	356	.	10.1303	38.8351	35.6252	495
chr1	36691158	36691913	ATACpk_peak_174	356	.	10.1303	38.8351	35.6252	495
chr1	36691158	36691913	ATACpk_peak_174	356	.	10.1303	38.8351	35.6252	495
chr1	36690992	36691752	ATACpk_peak_174	356	.	10.1303	38.8351	35.6252	495
chr1	36690992	36691752	ATACpk_peak_174	356	.	10.1303	38.8351	35.6252	495
chr1	36690992	36691752	ATACpk_peak_174	356	.	10.1303	38.8351	35.6252	495
chr1	36709585	36710165	ATACpk_peak_175	550	.	13.3194	58.5888	55.0638	394
chr1	36709585	36710165	ATACpk_peak_175	550	.	13.3194	58.5888	55.0638	394
chr1	36709585	36710165	ATACpk_peak_175	550	.	13.3194	58.5888	55.0638	394
chr1	36709585	36710165	ATACpk_peak_175	550	.	13.3194	58.5888	55.0638	394
chr1	36709585	36710165	ATACpk_peak_175	550	.	13.3194	58.5888	55.0638	394
chr1	36709585	36710165	ATACpk_peak_175	550	.	13.3194	58.5888	55.0638	394
chr1	36709585	36710165	ATACpk_peak_175	550	.	13.3194	58.5888	55.0638	394
chr1	36709585	36710165	ATACpk_peak_175	550	.	13.3194	58.5888	55.0638	394
chr1	36709585	36710165	ATACpk_peak_175	550	.	13.3194	58.5888	55.0638	394
chr1	36939045	36940223	ATACpk_peak_176	503	.	12.569	53.7657	50.3112	621
chr1	36939045	36940223	ATACpk_peak_176	503	.	12.569	53.7657	50.3112	621
chr1	36939045	36940223	ATACpk_peak_176	503	.	12.569	53.7657	50.3112	621
chr1	36939045	36940223	ATACpk_peak_176	503	.	12.569	53.7657	50.3112	621
chr1	36939045	36940223	ATACpk_peak_176	503	.	12.569	53.7657	50.3112	621
chr1	36939045	36940223	ATACpk_peak_176	503	.	12.569	53.7657	50.3112	621
chr1	36939045	36940121	ATACpk_peak_176	503	.	12.569	53.7657	50.3112	621
chr1	36939045	36940121	ATACpk_peak_176	503	.	12.569	53.7657	50.3112	621
chr1	36939045	36940121	ATACpk_peak_176	503	.	12.569	53.7657	50.3112	621
chr1	37028616	37029910	ATACpk_peak_177	272	.	8.62948	30.2984	27.2518	675
chr1	37028616	37029910	ATACpk_peak_177	272	.	8.62948	30.2984	27.2518	675
chr1	37028616	37029910	ATACpk_peak_177	272	.	8.62948	30.2984	27.2518	675
chr1	37028616	37029910	ATACpk_peak_177	272	.	8.62948	30.2984	27.2518	675
chr1	37028616	37029910	ATACpk_peak_177	272	.	8.62948	30.2984	27.2518	675
chr1	37028616	37029910	ATACpk_peak_177	272	.	8.62948	30.2984	27.2518	675
chr1	37028668	37029910	ATACpk_peak_177	272	.	8.62948	30.2984	27.2518	675
chr1	37028668	37029910	ATACpk_peak_177	272	.	8.62948	30.2984	27.2518	675
chr1	37028668	37029910	ATACpk_peak_177	272	.	8.62948	30.2984	27.2518	675
chr1	37075688	37076031	ATACpk_peak_178	85	.	4.68994	11.0793	8.53295	248
chr1	37075688	37076031	ATACpk_peak_178	85	.	4.68994	11.0793	8.53295	248
chr1	37075688	37076031	ATACpk_peak_178	85	.	4.68994	11.0793	8.53295	248
chr1	37075712	37076031	ATACpk_peak_178	85	.	4.68994	11.0793	8.53295	248
chr1	37075712	37076031	ATACpk_peak_178	85	.	4.68994	11.0793	8.53295	248
chr1	37075712	37076031	ATACpk_peak_178	85	.	4.68994	11.0793	8.53295	248
chr1	37075688	37076168	ATACpk_peak_178	85	.	4.68994	11.0793	8.53295	248
chr1	37075688	37076168	ATACpk_peak_178	85	.	4.68994	11.0793	8.53295	248
chr1	37075688	37076168	ATACpk_peak_178	85	.	4.68994	11.0793	8.53295	248
chr1	37299626	37300938	ATACpk_peak_179	456	.	11.8186	49.0453	45.6633	283
chr1	37299626	37300938	ATACpk_peak_179	456	.	11.8186	49.0453	45.6633	283
chr1	37299626	37300938	ATACpk_peak_179	456	.	11.8186	49.0453	45.6633	283
chr1	37299658	37300988	ATACpk_peak_179	456	.	11.8186	49.0453	45.6633	283
chr1	37299658	37300988	ATACpk_peak_179	456	.	11.8186	49.0453	45.6633	283
chr1	37299658	37300988	ATACpk_peak_179	456	.	11.8186	49.0453	45.6633	283
chr1	37299626	37300988	ATACpk_peak_179	456	.	11.8186	49.0453	45.6633	283
chr1	37299626	37300988	ATACpk_peak_179	456	.	11.8186	49.0453	45.6633	283
chr1	37299626	37300988	ATACpk_peak_179	456	.	11.8186	49.0453	45.6633	283
chr1	37429462	37430599	ATACpk_peak_180	673	.	15.1954	71.0603	67.3734	629
chr1	37429462	37430599	ATACpk_peak_180	673	.	15.1954	71.0603	67.3734	629
chr1	37429462	37430599	ATACpk_peak_180	673	.	15.1954	71.0603	67.3734	629
chr1	37429443	37430599	ATACpk_peak_180	673	.	15.1954	71.0603	67.3734	629
chr1	37429443	37430599	ATACpk_peak_180	673	.	15.1954	71.0603	67.3734	629
chr1	37429443	37430599	ATACpk_peak_180	673	.	15.1954	71.0603	67.3734	629
chr1	37429443	37430558	ATACpk_peak_180	673	.	15.1954	71.0603	67.3734	629
chr1	37429443	37430558	ATACpk_peak_180	673	.	15.1954	71.0603	67.3734	629
chr1	37429443	37430558	ATACpk_peak_180	673	.	15.1954	71.0603	67.3734	629
chr1	37864567	37865854	ATACpk_peak_182	789	.	16.8838	82.7425	78.9221	633
chr1	37864567	37865854	ATACpk_peak_182	789	.	16.8838	82.7425	78.9221	633
chr1	37864567	37865854	ATACpk_peak_182	789	.	16.8838	82.7425	78.9221	633
chr1	37864567	37865730	ATACpk_peak_182	789	.	16.8838	82.7425	78.9221	633
chr1	37864567	37865730	ATACpk_peak_182	789	.	16.8838	82.7425	78.9221	633
chr1	37864567	37865730	ATACpk_peak_182	789	.	16.8838	82.7425	78.9221	633
chr1	37864567	37865581	ATACpk_peak_182	789	.	16.8838	82.7425	78.9221	633
chr1	37864567	37865581	ATACpk_peak_182	789	.	16.8838	82.7425	78.9221	633
chr1	37864567	37865581	ATACpk_peak_182	789	.	16.8838	82.7425	78.9221	633
chr1	37871829	37872465	ATACpk_peak_183	185	.	6.94111	21.415	18.5672	736
chr1	37871829	37872465	ATACpk_peak_183	185	.	6.94111	21.415	18.5672	736
chr1	37871829	37872465	ATACpk_peak_183	185	.	6.94111	21.415	18.5672	736
chr1	37871937	37872589	ATACpk_peak_183	185	.	6.94111	21.415	18.5672	736
chr1	37871937	37872589	ATACpk_peak_183	185	.	6.94111	21.415	18.5672	736
chr1	37871937	37872589	ATACpk_peak_183	185	.	6.94111	21.415	18.5672	736
chr1	37872131	37872439	ATACpk_peak_183	185	.	6.94111	21.415	18.5672	736
chr1	37872131	37872439	ATACpk_peak_183	185	.	6.94111	21.415	18.5672	736
chr1	37872131	37872439	ATACpk_peak_183	185	.	6.94111	21.415	18.5672	736
chr1	37890125	37890760	ATACpk_peak_184	282	.	8.81708	31.3349	28.2675	608
chr1	37890125	37890760	ATACpk_peak_184	282	.	8.81708	31.3349	28.2675	608
chr1	37890125	37890760	ATACpk_peak_184	282	.	8.81708	31.3349	28.2675	608
chr1	37890125	37890760	ATACpk_peak_184	282	.	8.81708	31.3349	28.2675	608
chr1	37890125	37890760	ATACpk_peak_184	282	.	8.81708	31.3349	28.2675	608
chr1	37890125	37890760	ATACpk_peak_184	282	.	8.81708	31.3349	28.2675	608
chr1	37890314	37890744	ATACpk_peak_184	282	.	8.81708	31.3349	28.2675	608
chr1	37890314	37890744	ATACpk_peak_184	282	.	8.81708	31.3349	28.2675	608
chr1	37890314	37890744	ATACpk_peak_184	282	.	8.81708	31.3349	28.2675	608
chr1	37996739	37998734	ATACpk_peak_185	1116	.	21.3861	115.703	111.606	1290
chr1	37996739	37998734	ATACpk_peak_185	1116	.	21.3861	115.703	111.606	1290
chr1	37996739	37998734	ATACpk_peak_185	1116	.	21.3861	115.703	111.606	1290
chr1	37996739	37998734	ATACpk_peak_185	1116	.	21.3861	115.703	111.606	1290
chr1	37996739	37998734	ATACpk_peak_185	1116	.	21.3861	115.703	111.606	1290
chr1	37996739	37998734	ATACpk_peak_185	1116	.	21.3861	115.703	111.606	1290
chr1	37996756	37998641	ATACpk_peak_185	1116	.	21.3861	115.703	111.606	1290
chr1	37996756	37998641	ATACpk_peak_185	1116	.	21.3861	115.703	111.606	1290
chr1	37996756	37998641	ATACpk_peak_185	1116	.	21.3861	115.703	111.606	1290
chr1	38129062	38130202	ATACpk_peak_186	213	.	7.5039	24.2823	21.367	944
chr1	38129062	38130204	ATACpk_peak_186	213	.	7.5039	24.2823	21.367	944
chr1	38129062	38130204	ATACpk_peak_186	213	.	7.5039	24.2823	21.367	944
chr1	38128985	38130202	ATACpk_peak_186	213	.	7.5039	24.2823	21.367	944
chr1	38128985	38130204	ATACpk_peak_186	213	.	7.5039	24.2823	21.367	944
chr1	38128985	38130204	ATACpk_peak_186	213	.	7.5039	24.2823	21.367	944
chr1	38129032	38130202	ATACpk_peak_186	213	.	7.5039	24.2823	21.367	944
chr1	38129032	38130204	ATACpk_peak_186	213	.	7.5039	24.2823	21.367	944
chr1	38129032	38130204	ATACpk_peak_186	213	.	7.5039	24.2823	21.367	944
chr1	38132799	38133307	ATACpk_peak_187	57	.	3.93955	8.12754	5.70762	294
chr1	38132799	38133307	ATACpk_peak_187	57	.	3.93955	8.12754	5.70762	294
chr1	38132799	38133307	ATACpk_peak_187	57	.	3.93955	8.12754	5.70762	294
chr1	38133025	38133307	ATACpk_peak_187	57	.	3.93955	8.12754	5.70762	294
chr1	38133025	38133307	ATACpk_peak_187	57	.	3.93955	8.12754	5.70762	294
chr1	38133025	38133307	ATACpk_peak_187	57	.	3.93955	8.12754	5.70762	294
chr1	38233407	38234282	ATACpk_peak_188	158	.	6.37831	18.6513	15.8732	672
chr1	38233407	38234282	ATACpk_peak_188	158	.	6.37831	18.6513	15.8732	672
chr1	38233407	38234282	ATACpk_peak_188	158	.	6.37831	18.6513	15.8732	672
chr1	38233514	38234282	ATACpk_peak_188	158	.	6.37831	18.6513	15.8732	672
chr1	38233514	38234282	ATACpk_peak_188	158	.	6.37831	18.6513	15.8732	672
chr1	38233514	38234282	ATACpk_peak_188	158	.	6.37831	18.6513	15.8732	672
chr1	38233407	38234282	ATACpk_peak_188	158	.	6.37831	18.6513	15.8732	672
chr1	38233407	38234282	ATACpk_peak_188	158	.	6.37831	18.6513	15.8732	672
chr1	38233407	38234282	ATACpk_peak_188	158	.	6.37831	18.6513	15.8732	672
chr1	38429654	38430676	ATACpk_peak_189	562	.	13.507	59.81	56.2679	883
chr1	38429654	38430676	ATACpk_peak_189	562	.	13.507	59.81	56.2679	883
chr1	38429654	38430676	ATACpk_peak_189	562	.	13.507	59.81	56.2679	883
chr1	38429765	38430676	ATACpk_peak_189	562	.	13.507	59.81	56.2679	883
chr1	38429765	38430676	ATACpk_peak_189	562	.	13.507	59.81	56.2679	883
chr1	38429765	38430676	ATACpk_peak_189	562	.	13.507	59.81	56.2679	883
chr1	38430101	38430671	ATACpk_peak_189	562	.	13.507	59.81	56.2679	883
chr1	38430101	38430671	ATACpk_peak_189	562	.	13.507	59.81	56.2679	883
chr1	38430101	38430671	ATACpk_peak_189	562	.	13.507	59.81	56.2679	883
chr1	38767130	38767349	ATACpk_peak_190	26	.	3.00156	4.89156	2.67543	77
chr1	38767130	38767349	ATACpk_peak_190	26	.	3.00156	4.89156	2.67543	77
chr1	38767130	38767349	ATACpk_peak_190	26	.	3.00156	4.89156	2.67543	77
chr1	38809261	38809638	ATACpk_peak_191	26	.	3.00156	4.89156	2.67543	40
chr1	38809261	38809638	ATACpk_peak_191	26	.	3.00156	4.89156	2.67543	40
chr1	38809261	38809638	ATACpk_peak_191	26	.	3.00156	4.89156	2.67543	40
chr1	38809261	38809638	ATACpk_peak_191	26	.	3.00156	4.89156	2.67543	40
chr1	38809261	38809638	ATACpk_peak_191	26	.	3.00156	4.89156	2.67543	40
chr1	38809261	38809638	ATACpk_peak_191	26	.	3.00156	4.89156	2.67543	40
chr1	38809276	38809638	ATACpk_peak_191	26	.	3.00156	4.89156	2.67543	40
chr1	38809276	38809638	ATACpk_peak_191	26	.	3.00156	4.89156	2.67543	40
chr1	38809276	38809638	ATACpk_peak_191	26	.	3.00156	4.89156	2.67543	40
chr1	38835871	38836687	ATACpk_peak_192	141	.	6.00312	16.8707	14.1409	294
chr1	38835871	38836687	ATACpk_peak_192	141	.	6.00312	16.8707	14.1409	294
chr1	38835871	38836687	ATACpk_peak_192	141	.	6.00312	16.8707	14.1409	294
chr1	38835860	38836687	ATACpk_peak_192	141	.	6.00312	16.8707	14.1409	294
chr1	38835860	38836687	ATACpk_peak_192	141	.	6.00312	16.8707	14.1409	294
chr1	38835860	38836687	ATACpk_peak_192	141	.	6.00312	16.8707	14.1409	294
chr1	38835944	38836687	ATACpk_peak_192	141	.	6.00312	16.8707	14.1409	294
chr1	38835944	38836687	ATACpk_peak_192	141	.	6.00312	16.8707	14.1409	294
chr1	38835944	38836687	ATACpk_peak_192	141	.	6.00312	16.8707	14.1409	294
chr1	38987278	38988330	ATACpk_peak_193	750	.	16.321	78.8033	75.0266	527
chr1	38987278	38988330	ATACpk_peak_193	750	.	16.321	78.8033	75.0266	527
chr1	38987278	38988330	ATACpk_peak_193	750	.	16.321	78.8033	75.0266	527
chr1	38987278	38988330	ATACpk_peak_193	750	.	16.321	78.8033	75.0266	527
chr1	38987278	38988330	ATACpk_peak_193	750	.	16.321	78.8033	75.0266	527
chr1	38987278	38988330	ATACpk_peak_193	750	.	16.321	78.8033	75.0266	527
chr1	38987278	38988150	ATACpk_peak_193	750	.	16.321	78.8033	75.0266	527
chr1	38987278	38988150	ATACpk_peak_193	750	.	16.321	78.8033	75.0266	527
chr1	38987278	38988150	ATACpk_peak_193	750	.	16.321	78.8033	75.0266	527
chr1	39045846	39046300	ATACpk_peak_194	44	.	3.56435	6.76701	4.42147	50
chr1	39045846	39046300	ATACpk_peak_194	44	.	3.56435	6.76701	4.42147	50
chr1	39045846	39046300	ATACpk_peak_194	44	.	3.56435	6.76701	4.42147	50
chr1	39045846	39046300	ATACpk_peak_194	44	.	3.56435	6.76701	4.42147	50
chr1	39045846	39046300	ATACpk_peak_194	44	.	3.56435	6.76701	4.42147	50
chr1	39045846	39046300	ATACpk_peak_194	44	.	3.56435	6.76701	4.42147	50
chr1	39193129	39193291	ATACpk_peak_195	100	.	5.06513	12.6585	10.057	987
chr1	39193129	39193291	ATACpk_peak_195	100	.	5.06513	12.6585	10.057	987
chr1	39193129	39193291	ATACpk_peak_195	100	.	5.06513	12.6585	10.057	987
chr1	39193751	39194240	ATACpk_peak_195	100	.	5.06513	12.6585	10.057	987
chr1	39193751	39194240	ATACpk_peak_195	100	.	5.06513	12.6585	10.057	987
chr1	39193751	39194240	ATACpk_peak_195	100	.	5.06513	12.6585	10.057	987
chr1	39193761	39194240	ATACpk_peak_195	100	.	5.06513	12.6585	10.057	987
chr1	39193761	39194240	ATACpk_peak_195	100	.	5.06513	12.6585	10.057	987
chr1	39193761	39194240	ATACpk_peak_195	100	.	5.06513	12.6585	10.057	987
chr1	39193847	39194240	ATACpk_peak_195	100	.	5.06513	12.6585	10.057	987
chr1	39193847	39194240	ATACpk_peak_195	100	.	5.06513	12.6585	10.057	987
chr1	39193847	39194240	ATACpk_peak_195	100	.	5.06513	12.6585	10.057	987
chr1	39367440	39368398	ATACpk_peak_196	194	.	7.1287	22.3596	19.4893	611
chr1	39367440	39368398	ATACpk_peak_196	194	.	7.1287	22.3596	19.4893	611
chr1	39367440	39368398	ATACpk_peak_196	194	.	7.1287	22.3596	19.4893	611
chr1	39367440	39368398	ATACpk_peak_196	194	.	7.1287	22.3596	19.4893	611
chr1	39367440	39368398	ATACpk_peak_196	194	.	7.1287	22.3596	19.4893	611
chr1	39367440	39368398	ATACpk_peak_196	194	.	7.1287	22.3596	19.4893	611
chr1	39367440	39368321	ATACpk_peak_196	194	.	7.1287	22.3596	19.4893	611
chr1	39367440	39368321	ATACpk_peak_196	194	.	7.1287	22.3596	19.4893	611
chr1	39367440	39368321	ATACpk_peak_196	194	.	7.1287	22.3596	19.4893	611
chr1	39535538	39536395	ATACpk_peak_198	378	.	10.5055	41.0519	37.8028	179
chr1	39535538	39536395	ATACpk_peak_198	378	.	10.5055	41.0519	37.8028	179
chr1	39535538	39536395	ATACpk_peak_198	378	.	10.5055	41.0519	37.8028	179
chr1	39535538	39536396	ATACpk_peak_198	378	.	10.5055	41.0519	37.8028	179
chr1	39535538	39536396	ATACpk_peak_198	378	.	10.5055	41.0519	37.8028	179
chr1	39535538	39536396	ATACpk_peak_198	378	.	10.5055	41.0519	37.8028	179
chr1	39535538	39536365	ATACpk_peak_198	378	.	10.5055	41.0519	37.8028	179
chr1	39535538	39536365	ATACpk_peak_198	378	.	10.5055	41.0519	37.8028	179
chr1	39535538	39536365	ATACpk_peak_198	378	.	10.5055	41.0519	37.8028	179
chr1	39576729	39577551	ATACpk_peak_199	468	.	12.0062	50.2154	46.8149	603
chr1	39576729	39577639	ATACpk_peak_199	468	.	12.0062	50.2154	46.8149	603
chr1	39576729	39577639	ATACpk_peak_199	468	.	12.0062	50.2154	46.8149	603
chr1	39576729	39577551	ATACpk_peak_199	468	.	12.0062	50.2154	46.8149	603
chr1	39576729	39577556	ATACpk_peak_199	468	.	12.0062	50.2154	46.8149	603
chr1	39576729	39577556	ATACpk_peak_199	468	.	12.0062	50.2154	46.8149	603
chr1	39576729	39577551	ATACpk_peak_199	468	.	12.0062	50.2154	46.8149	603
chr1	39576729	39577566	ATACpk_peak_199	468	.	12.0062	50.2154	46.8149	603
chr1	39576729	39577566	ATACpk_peak_199	468	.	12.0062	50.2154	46.8149	603
chr1	39720792	39721509	ATACpk_peak_200	63	.	4.12714	8.83787	6.38376	573
chr1	39720792	39721509	ATACpk_peak_200	63	.	4.12714	8.83787	6.38376	573
chr1	39720792	39721509	ATACpk_peak_200	63	.	4.12714	8.83787	6.38376	573
chr1	39720792	39721523	ATACpk_peak_200	63	.	4.12714	8.83787	6.38376	573
chr1	39720792	39721523	ATACpk_peak_200	63	.	4.12714	8.83787	6.38376	573
chr1	39720792	39721523	ATACpk_peak_200	63	.	4.12714	8.83787	6.38376	573
chr1	39720798	39721543	ATACpk_peak_200	63	.	4.12714	8.83787	6.38376	573
chr1	39720798	39721543	ATACpk_peak_200	63	.	4.12714	8.83787	6.38376	573
chr1	39720798	39721543	ATACpk_peak_200	63	.	4.12714	8.83787	6.38376	573
chr1	39755985	39756453	ATACpk_peak_201	57	.	3.93955	8.12754	5.70762	301
chr1	39755985	39756453	ATACpk_peak_201	57	.	3.93955	8.12754	5.70762	301
chr1	39755985	39756453	ATACpk_peak_201	57	.	3.93955	8.12754	5.70762	301
chr1	39755805	39756653	ATACpk_peak_201	57	.	3.93955	8.12754	5.70762	301
chr1	39755795	39756653	ATACpk_peak_201	57	.	3.93955	8.12754	5.70762	301
chr1	39755795	39756653	ATACpk_peak_201	57	.	3.93955	8.12754	5.70762	301
chr1	39756068	39756653	ATACpk_peak_201	57	.	3.93955	8.12754	5.70762	301
chr1	39756068	39756653	ATACpk_peak_201	57	.	3.93955	8.12754	5.70762	301
chr1	39756068	39756653	ATACpk_peak_201	57	.	3.93955	8.12754	5.70762	301
chr1	39892902	39893362	ATACpk_peak_202	85	.	4.68994	11.0793	8.53295	356
chr1	39892902	39893362	ATACpk_peak_202	85	.	4.68994	11.0793	8.53295	356
chr1	39892902	39893362	ATACpk_peak_202	85	.	4.68994	11.0793	8.53295	356
chr1	39892889	39893284	ATACpk_peak_202	85	.	4.68994	11.0793	8.53295	356
chr1	39892889	39893284	ATACpk_peak_202	85	.	4.68994	11.0793	8.53295	356
chr1	39892889	39893284	ATACpk_peak_202	85	.	4.68994	11.0793	8.53295	356
chr1	39900740	39901072	ATACpk_peak_203	63	.	4.12714	8.83787	6.38376	319
chr1	39900740	39901072	ATACpk_peak_203	63	.	4.12714	8.83787	6.38376	319
chr1	39900740	39901072	ATACpk_peak_203	63	.	4.12714	8.83787	6.38376	319
chr1	39900740	39901072	ATACpk_peak_203	63	.	4.12714	8.83787	6.38376	319
chr1	39900740	39901072	ATACpk_peak_203	63	.	4.12714	8.83787	6.38376	319
chr1	39900740	39901072	ATACpk_peak_203	63	.	4.12714	8.83787	6.38376	319
chr1	39900740	39901060	ATACpk_peak_203	63	.	4.12714	8.83787	6.38376	319
chr1	39900740	39901060	ATACpk_peak_203	63	.	4.12714	8.83787	6.38376	319
chr1	39900740	39901060	ATACpk_peak_203	63	.	4.12714	8.83787	6.38376	319
chr1	40211447	40212312	ATACpk_peak_204	70	.	4.31474	9.56711	7.0808	319
chr1	40211447	40212312	ATACpk_peak_204	70	.	4.31474	9.56711	7.0808	319
chr1	40211447	40212312	ATACpk_peak_204	70	.	4.31474	9.56711	7.0808	319
chr1	40211432	40212312	ATACpk_peak_204	70	.	4.31474	9.56711	7.0808	319
chr1	40211432	40212312	ATACpk_peak_204	70	.	4.31474	9.56711	7.0808	319
chr1	40211432	40212312	ATACpk_peak_204	70	.	4.31474	9.56711	7.0808	319
chr1	40211432	40211814	ATACpk_peak_204	70	.	4.31474	9.56711	7.0808	319
chr1	40211432	40211814	ATACpk_peak_204	70	.	4.31474	9.56711	7.0808	319
chr1	40211432	40211814	ATACpk_peak_204	70	.	4.31474	9.56711	7.0808	319
chr1	40767826	40768154	ATACpk_peak_205	70	.	4.31474	9.56711	7.0808	96
chr1	40767826	40768154	ATACpk_peak_205	70	.	4.31474	9.56711	7.0808	96
chr1	40767826	40768154	ATACpk_peak_205	70	.	4.31474	9.56711	7.0808	96
chr1	40767826	40767936	ATACpk_peak_205	70	.	4.31474	9.56711	7.0808	96
chr1	40767826	40767936	ATACpk_peak_205	70	.	4.31474	9.56711	7.0808	96
chr1	40767826	40767936	ATACpk_peak_205	70	.	4.31474	9.56711	7.0808	96
chr1	40790298	40790841	ATACpk_peak_206	252	.	8.25429	28.2535	25.2493	432
chr1	40790298	40790841	ATACpk_peak_206	252	.	8.25429	28.2535	25.2493	432
chr1	40790298	40790841	ATACpk_peak_206	252	.	8.25429	28.2535	25.2493	432
chr1	40790430	40790949	ATACpk_peak_206	252	.	8.25429	28.2535	25.2493	432
chr1	40790430	40790949	ATACpk_peak_206	252	.	8.25429	28.2535	25.2493	432
chr1	40790430	40790949	ATACpk_peak_206	252	.	8.25429	28.2535	25.2493	432
chr1	40790454	40790993	ATACpk_peak_206	252	.	8.25429	28.2535	25.2493	432
chr1	40790454	40790993	ATACpk_peak_206	252	.	8.25429	28.2535	25.2493	432
chr1	40790454	40790993	ATACpk_peak_206	252	.	8.25429	28.2535	25.2493	432
chr1	42697939	42698387	ATACpk_peak_208	57	.	3.93955	8.12754	5.70762	236
chr1	42697939	42698387	ATACpk_peak_208	57	.	3.93955	8.12754	5.70762	236
chr1	42697939	42698387	ATACpk_peak_208	57	.	3.93955	8.12754	5.70762	236
chr1	42698034	42698387	ATACpk_peak_208	57	.	3.93955	8.12754	5.70762	236
chr1	42698034	42698387	ATACpk_peak_208	57	.	3.93955	8.12754	5.70762	236
chr1	42698034	42698387	ATACpk_peak_208	57	.	3.93955	8.12754	5.70762	236
chr1	42850880	42851686	ATACpk_peak_209	367	.	10.3179	39.9396	36.7101	415
chr1	42850880	42851686	ATACpk_peak_209	367	.	10.3179	39.9396	36.7101	415
chr1	42850880	42851686	ATACpk_peak_209	367	.	10.3179	39.9396	36.7101	415
chr1	42850880	42851686	ATACpk_peak_209	367	.	10.3179	39.9396	36.7101	415
chr1	42850880	42851686	ATACpk_peak_209	367	.	10.3179	39.9396	36.7101	415
chr1	42850880	42851686	ATACpk_peak_209	367	.	10.3179	39.9396	36.7101	415
chr1	42850938	42851686	ATACpk_peak_209	367	.	10.3179	39.9396	36.7101	415
chr1	42850938	42851686	ATACpk_peak_209	367	.	10.3179	39.9396	36.7101	415
chr1	42850938	42851686	ATACpk_peak_209	367	.	10.3179	39.9396	36.7101	415
chr1	42883493	42883759	ATACpk_peak_210	185	.	6.94111	21.415	18.5672	121
chr1	42883493	42883759	ATACpk_peak_210	185	.	6.94111	21.415	18.5672	121
chr1	42883493	42883759	ATACpk_peak_210	185	.	6.94111	21.415	18.5672	121
chr1	42883493	42883755	ATACpk_peak_210	185	.	6.94111	21.415	18.5672	121
chr1	42883493	42883755	ATACpk_peak_210	185	.	6.94111	21.415	18.5672	121
chr1	42883493	42883755	ATACpk_peak_210	185	.	6.94111	21.415	18.5672	121
chr1	42883493	42883727	ATACpk_peak_210	185	.	6.94111	21.415	18.5672	121
chr1	42883493	42883727	ATACpk_peak_210	185	.	6.94111	21.415	18.5672	121
chr1	42883493	42883727	ATACpk_peak_210	185	.	6.94111	21.415	18.5672	121
chr1	43098402	43098958	ATACpk_peak_211	167	.	6.56591	19.5605	16.7585	335
chr1	43098402	43098958	ATACpk_peak_211	167	.	6.56591	19.5605	16.7585	335
chr1	43098402	43098958	ATACpk_peak_211	167	.	6.56591	19.5605	16.7585	335
chr1	43098424	43098958	ATACpk_peak_211	167	.	6.56591	19.5605	16.7585	335
chr1	43098424	43098958	ATACpk_peak_211	167	.	6.56591	19.5605	16.7585	335
chr1	43098424	43098958	ATACpk_peak_211	167	.	6.56591	19.5605	16.7585	335
chr1	43098393	43098958	ATACpk_peak_211	167	.	6.56591	19.5605	16.7585	335
chr1	43098393	43098958	ATACpk_peak_211	167	.	6.56591	19.5605	16.7585	335
chr1	43098393	43098958	ATACpk_peak_211	167	.	6.56591	19.5605	16.7585	335
chr1	43827273	43828125	ATACpk_peak_213	636	.	14.6326	67.2598	63.6192	833
chr1	43827273	43828125	ATACpk_peak_213	636	.	14.6326	67.2598	63.6192	833
chr1	43827273	43828125	ATACpk_peak_213	636	.	14.6326	67.2598	63.6192	833
chr1	43827046	43828168	ATACpk_peak_213	636	.	14.6326	67.2598	63.6192	833
chr1	43827046	43828168	ATACpk_peak_213	636	.	14.6326	67.2598	63.6192	833
chr1	43827046	43828168	ATACpk_peak_213	636	.	14.6326	67.2598	63.6192	833
chr1	43827046	43828168	ATACpk_peak_213	636	.	14.6326	67.2598	63.6192	833
chr1	43827046	43828168	ATACpk_peak_213	636	.	14.6326	67.2598	63.6192	833
chr1	43827046	43828168	ATACpk_peak_213	636	.	14.6326	67.2598	63.6192	833
chr1	43933580	43934556	ATACpk_peak_214	1031	.	20.2605	107.238	103.192	384
chr1	43933580	43934556	ATACpk_peak_214	1031	.	20.2605	107.238	103.192	384
chr1	43933580	43934556	ATACpk_peak_214	1031	.	20.2605	107.238	103.192	384
chr1	43933580	43934619	ATACpk_peak_214	1031	.	20.2605	107.238	103.192	384
chr1	43933580	43934619	ATACpk_peak_214	1031	.	20.2605	107.238	103.192	384
chr1	43933580	43934619	ATACpk_peak_214	1031	.	20.2605	107.238	103.192	384
chr1	43933580	43934619	ATACpk_peak_214	1031	.	20.2605	107.238	103.192	384
chr1	43933580	43934619	ATACpk_peak_214	1031	.	20.2605	107.238	103.192	384
chr1	43933580	43934619	ATACpk_peak_214	1031	.	20.2605	107.238	103.192	384
chr1	44081275	44082762	ATACpk_peak_215	116	.	5.44033	14.3002	11.646	734
chr1	44081275	44082762	ATACpk_peak_215	116	.	5.44033	14.3002	11.646	734
chr1	44081275	44082762	ATACpk_peak_215	116	.	5.44033	14.3002	11.646	734
chr1	44080979	44082333	ATACpk_peak_215	116	.	5.44033	14.3002	11.646	734
chr1	44080979	44082333	ATACpk_peak_215	116	.	5.44033	14.3002	11.646	734
chr1	44080979	44082333	ATACpk_peak_215	116	.	5.44033	14.3002	11.646	734
chr1	44082599	44082762	ATACpk_peak_215	116	.	5.44033	14.3002	11.646	734
chr1	44082599	44082762	ATACpk_peak_215	116	.	5.44033	14.3002	11.646	734
chr1	44082599	44082762	ATACpk_peak_215	116	.	5.44033	14.3002	11.646	734
chr1	44081259	44082686	ATACpk_peak_215	116	.	5.44033	14.3002	11.646	734
chr1	44081259	44082686	ATACpk_peak_215	116	.	5.44033	14.3002	11.646	734
chr1	44081259	44082686	ATACpk_peak_215	116	.	5.44033	14.3002	11.646	734
chr1	44083939	44084440	ATACpk_peak_216	38	.	3.37675	6.11872	3.81342	201
chr1	44083939	44084440	ATACpk_peak_216	38	.	3.37675	6.11872	3.81342	201
chr1	44083939	44084440	ATACpk_peak_216	38	.	3.37675	6.11872	3.81342	201
chr1	44101635	44102768	ATACpk_peak_217	586	.	13.8822	62.2702	58.6945	724
chr1	44101635	44102768	ATACpk_peak_217	586	.	13.8822	62.2702	58.6945	724
chr1	44101635	44102768	ATACpk_peak_217	586	.	13.8822	62.2702	58.6945	724
chr1	44101635	44102768	ATACpk_peak_217	586	.	13.8822	62.2702	58.6945	724
chr1	44101635	44102768	ATACpk_peak_217	586	.	13.8822	62.2702	58.6945	724
chr1	44101635	44102768	ATACpk_peak_217	586	.	13.8822	62.2702	58.6945	724
chr1	44101635	44102768	ATACpk_peak_217	586	.	13.8822	62.2702	58.6945	724
chr1	44101635	44102768	ATACpk_peak_217	586	.	13.8822	62.2702	58.6945	724
chr1	44101635	44102768	ATACpk_peak_217	586	.	13.8822	62.2702	58.6945	724
chr1	44147658	44148271	ATACpk_peak_218	282	.	8.81708	31.3349	28.2675	410
chr1	44147658	44148271	ATACpk_peak_218	282	.	8.81708	31.3349	28.2675	410
chr1	44147658	44148271	ATACpk_peak_218	282	.	8.81708	31.3349	28.2675	410
chr1	44147651	44148271	ATACpk_peak_218	282	.	8.81708	31.3349	28.2675	410
chr1	44147651	44148271	ATACpk_peak_218	282	.	8.81708	31.3349	28.2675	410
chr1	44147651	44148271	ATACpk_peak_218	282	.	8.81708	31.3349	28.2675	410
chr1	44147622	44148164	ATACpk_peak_218	282	.	8.81708	31.3349	28.2675	410
chr1	44147622	44148164	ATACpk_peak_218	282	.	8.81708	31.3349	28.2675	410
chr1	44147622	44148164	ATACpk_peak_218	282	.	8.81708	31.3349	28.2675	410
chr1	44480727	44481474	ATACpk_peak_219	32	.	3.18916	5.49317	3.23067	133
chr1	44480727	44481474	ATACpk_peak_219	32	.	3.18916	5.49317	3.23067	133
chr1	44480727	44481474	ATACpk_peak_219	32	.	3.18916	5.49317	3.23067	133
chr1	44480727	44481474	ATACpk_peak_219	32	.	3.18916	5.49317	3.23067	133
chr1	44480727	44481474	ATACpk_peak_219	32	.	3.18916	5.49317	3.23067	133
chr1	44480727	44481474	ATACpk_peak_219	32	.	3.18916	5.49317	3.23067	133
chr1	44480727	44481474	ATACpk_peak_219	32	.	3.18916	5.49317	3.23067	133
[truncated: 150,636 more rows]

## Sheet: ATACblfilt_GainedPks
Chromosome	Start	End	Name	Score	Strand	Signal Value	pValue (-log10)	qValue (-log10)
[truncated: 32,961 more rows]

[truncated: 7 more sheets: ATACblfilt_LostPks, Kmeans C1+C2, Kmeans C3, Kmeans C4, Kmeans G1+G3, Kmeans G2, Kmeans G4]
