# Supplementary material for: ARID1A governs the silencing of sex-linked transcription during male meiosis in the mouse
Source: eLife. 2024 Nov 26;12:RP88024. doi: 10.7554/eLife.88024 (PMC11594533; doi:10.7554/eLife.88024)
Supplement: Figure 5—figure supplement 2—source data 1. — H3.3 association with TSSs of genes differentially regulated by ARID1A. [file elife-88024-fig5-figsupp2-data1.xlsx]

## Sheet: Arid1aWT_commonPks_rel2rabIgG
Figure 5-Figure Supplement 2-Source Data 1: MACS2 H3.3 peak calls from Arid1a WT and Arid1a cKO pachytene spermatocytes
Chromosome	Start	End	Name	Score	Strand	Signal Value	pValue (-log10)	qValue (-log10)
chr1	189194354	189194827	H33_peak_1	57	.	7.05109	10.1556	5.70986
chr3	93699716	93700162	H33_peak_7	133	.	10.9429	18.4856	13.3178
chr6	142662322	142662566	H33_peak_8	37	.	6.00726	8.01997	3.77279
chr9	50832831	50833311	H33_peak_9	93	.	9.04889	14.0956	9.33888
chrX	123201456	123204490	H33_peak_17	26	.	5.28817	6.73161	2.65563
chrX	123206087	123209438	H33_peak_18	46	.	6.52253	9.02854	4.6811
chrX	123241422	123241770	H33_peak_19	38	.	6.07848	8.07323	3.81506
chrX	123281119	123281908	H33_peak_20	29	.	5.43218	7.06116	2.93278
chrX	123437943	123438219	H33_peak_21	21	.	5.02345	6.20738	2.19999
chrX	123444559	123446833	H33_peak_23	28	.	5.40919	6.98711	2.87119
chrX	123449407	123451140	H33_peak_24	37	.	5.99809	8.00771	3.76334
chrX	123452704	123453102	H33_peak_25	37	.	6.0036	8.03344	3.77754
chrX	123455548	123457831	H33_peak_26	28	.	5.44738	6.92969	2.82046
chrX	123459131	123461851	H33_peak_27	29	.	5.42628	7.05346	2.93873
chrX	123463509	123464577	H33_peak_28	26	.	5.37793	6.77102	2.68355
chrX	123655531	123657512	H33_peak_31	26	.	5.26747	6.70646	2.6271
chrX	124342355	124343769	H33_peak_43	55	.	7.10748	10.0565	5.57493
chrX	124345439	124345672	H33_peak_44	35	.	5.85055	7.74481	3.53196
chrX	124382446	124382697	H33_peak_45	27	.	5.43441	6.86855	2.76581
chrX	124384273	124387215	H33_peak_46	31	.	5.59474	7.25691	3.108
chrX	124391329	124391559	H33_peak_47	35	.	5.90675	7.70594	3.52978
chrX	124392720	124393444	H33_peak_48	39	.	6.14758	8.24735	3.97326
chrX	124404908	124405199	H33_peak_49	35	.	5.85482	7.74896	3.53256
chrX	124517788	124518072	H33_peak_51	30	.	5.59763	7.13633	3.00169
chrX	124647118	124647402	H33_peak_53	31	.	5.71009	7.25704	3.10488
chrX	124848355	124849765	H33_peak_54	34	.	5.73921	7.58778	3.43493
chrX	124851457	124851700	H33_peak_54	34	.	5.73921	7.58778	3.43493
chrX	124887835	124891125	H33_peak_56	31	.	5.61142	7.32447	3.16638
chrX	124896246	124897056	H33_peak_57	40	.	6.199	8.37079	4.08282
chrX	124903487	124903790	H33_peak_58	26	.	5.41908	6.69411	2.61663
chrX	124908518	124908851	H33_peak_59	31	.	5.67249	7.33242	3.1648
chrX	125015123	125015371	H33_peak_60	30	.	5.4874	7.18922	3.04526
chrX	125322344	125323836	H33_peak_62	28	.	5.44768	6.99496	2.87965
chrX	125319229	125321317	H33_peak_62	28	.	5.44768	6.99496	2.87965
chrX	125327715	125329269	H33_peak_64	40	.	6.15668	8.34503	4.06029
chrX	125334852	125335177	H33_peak_65	29	.	5.51062	7.09395	2.96457
chrX	125339905	125340238	H33_peak_66	30	.	5.55838	7.21801	3.06795
chrX	125585353	125586098	H33_peak_68	27	.	5.33236	6.89401	2.79044
chrX	125582267	125584381	H33_peak_68	27	.	5.33236	6.89401	2.79044
chrX	125590743	125592371	H33_peak_69	39	.	6.0545	8.17559	3.91201
chrX	125597920	125598215	H33_peak_70	28	.	5.44737	6.94529	2.83378
chrX	125602948	125603256	H33_peak_71	31	.	5.68645	7.34177	3.17689
chrX	125722673	125722916	H33_peak_74	29	.	5.58964	7.10869	2.97814
chrX	125905428	125905710	H33_peak_76	33	.	5.75046	7.50874	3.32647
chrX	125996097	125996447	H33_peak_79	24	.	5.20757	6.49366	2.44498
chrX	126025600	126030591	H33_peak_80	64	.	7.51092	10.9892	6.44221
chrX	126039795	126040923	H33_peak_81	33	.	5.80636	7.56995	3.38087
chrX	126042893	126043722	H33_peak_82	39	.	6.05126	8.17797	3.95102
chrX	126044798	126045028	H33_peak_83	32	.	5.71987	7.46979	3.28791
chrX	126056676	126057291	H33_peak_85	47	.	6.57668	9.02379	4.7332
chrX	126062282	126063104	H33_peak_86	27	.	5.41586	6.84094	2.74166
chrX	126064185	126064702	H33_peak_87	37	.	6.04616	7.99483	3.75016
chrX	126067588	126070884	H33_peak_88	36	.	5.90364	7.92039	3.69636
chrX	126072508	126073859	H33_peak_89	61	.	7.44898	10.7008	6.1673
chrX	126077545	126078355	H33_peak_90	31	.	5.49532	7.22711	3.12922
chrY	4985674	4987345	H33_peak_107	30	.	5.56329	7.14772	3.01259
chrY	4993575	4994501	H33_peak_108	24	.	5.21699	6.52607	2.47509
chrY	5004638	5005014	H33_peak_109	36	.	5.96469	7.90886	3.6802
chrY	5027686	5027952	H33_peak_111	33	.	5.83159	7.53655	3.34239
chrY	5029228	5031932	H33_peak_112	35	.	5.86774	7.7254	3.51528
chrY	5047511	5048820	H33_peak_113	28	.	5.39102	6.96123	2.85007
chrY	5050659	5055184	H33_peak_114	49	.	6.61422	9.30047	4.94123
chrY	5056443	5057111	H33_peak_114	49	.	6.61422	9.30047	4.94123
chrY	5059484	5059838	H33_peak_115	23	.	5.11117	6.40299	2.36739
chrY	5060859	5061940	H33_peak_116	38	.	6.07072	8.09396	3.8446
chrY	5241352	5241804	H33_peak_119	27	.	5.27399	6.79183	2.70389
chrY	5244584	5247779	H33_peak_120	35	.	5.8613	7.7636	3.55212
chrY	5259717	5261230	H33_peak_122	28	.	5.41348	6.98732	2.87235
chrY	5263730	5264874	H33_peak_123	22	.	5.05332	6.31726	2.29402
chrY	5271400	5273607	H33_peak_124	32	.	5.67992	7.38623	3.21754
chrY	5275067	5278724	H33_peak_125	60	.	7.28449	10.5485	6.03933
chrY	5522998	5523305	H33_peak_126	54	.	6.96947	9.89214	5.43259
chrY	5623515	5624076	H33_peak_127	24	.	5.19546	6.4899	2.44189
chrY	5625997	5626228	H33_peak_128	33	.	5.77346	7.56069	3.37074
chrY	5646352	5646798	H33_peak_130	38	.	6.04578	8.05261	3.80649
chrY	5651318	5652456	H33_peak_131	26	.	5.1662	6.56944	2.6147
chrY	5660893	5661976	H33_peak_132	23	.	5.0685	6.25989	2.3535
chrY	5688586	5689082	H33_peak_133	22	.	4.98624	6.11597	2.21573
chrY	5695833	5697361	H33_peak_134	50	.	6.84235	9.51261	5.09682
chrY	5703081	5704039	H33_peak_135	24	.	5.16002	6.5578	2.49988
chrY	5708823	5709527	H33_peak_136	48	.	6.67389	9.20292	4.84685
chrY	5722075	5723196	H33_peak_137	128	.	10.8375	18.0096	12.8174
chrY	5726514	5726861	H33_peak_138	36	.	5.87656	7.86215	3.6381
chrY	5729281	5730590	H33_peak_139	52	.	6.83125	9.63974	5.22003
chrY	5733071	5733496	H33_peak_140	63	.	7.50881	10.9201	6.34875
chrY	5742479	5743523	H33_peak_141	27	.	5.40228	6.87464	2.77103
chrY	5754085	5755185	H33_peak_144	54	.	6.91464	9.8612	5.41597
chrY	5757107	5759865	H33_peak_145	52	.	6.82843	9.68096	5.26916
chrY	5761267	5761732	H33_peak_146	60	.	7.40422	10.5732	6.03071
chrY	5808811	5809060	H33_peak_147	31	.	5.66526	7.33308	3.17415
chrY	5834510	5835306	H33_peak_149	26	.	5.22412	6.71265	2.6324
chrY	5841017	5841264	H33_peak_150	26	.	5.37382	6.6809	2.60523
chrY	5844093	5845859	H33_peak_151	103	.	9.60905	15.2633	10.314
chrY	5849052	5849491	H33_peak_152	21	.	4.95956	6.20738	2.19999
chrY	5871029	5871325	H33_peak_153	51	.	6.83444	9.62441	5.19911
chrY	5876825	5879461	H33_peak_155	35	.	5.92795	7.79518	3.59508
chrY	5880427	5882259	H33_peak_156	29	.	5.45601	7.02414	2.90181
chrY	5905154	5905478	H33_peak_157	31	.	5.60528	7.34732	3.18756
chrY	5906438	5906951	H33_peak_158	28	.	5.34152	6.97558	2.86782
chrY	5934732	5935483	H33_peak_161	32	.	5.67085	7.42224	3.25071
chrY	5936863	5937419	H33_peak_162	24	.	5.19305	6.50024	2.45062
chrY	5942274	5942504	H33_peak_163	28	.	5.44013	6.98453	2.87075
chrY	5949726	5950062	H33_peak_164	31	.	5.59899	7.25291	3.10531
chrY	5993015	5993763	H33_peak_167	31	.	5.61134	7.30313	3.1465
chrY	5996595	5996849	H33_peak_168	33	.	5.72739	7.55702	3.36978
chrY	6004970	6005210	H33_peak_169	43	.	6.33757	8.63796	4.31574
chrY	6012717	6014619	H33_peak_170	178	.	13.0966	23.4055	17.8094
chrY	6016601	6017752	H33_peak_171	50	.	6.76535	9.49934	5.08627
chrY	6020268	6023345	H33_peak_172	41	.	6.18591	8.41879	4.1582
chrY	6040200	6040463	H33_peak_174	45	.	6.52865	8.86347	4.51176
chrY	6044463	6045415	H33_peak_175	51	.	6.7562	9.51806	5.12168
chrY	6046642	6051559	H33_peak_176	55	.	6.94211	9.94826	5.53112
chrY	6053195	6054893	H33_peak_177	45	.	6.42563	8.87322	4.55706
chrY	6061860	6063557	H33_peak_178	28	.	5.4288	6.92063	2.81468
chrY	6080303	6080612	H33_peak_180	64	.	7.59169	10.9898	6.40596
chrY	6086281	6088813	H33_peak_181	31	.	5.54711	7.28177	3.16775
chrY	6090947	6091178	H33_peak_182	30	.	5.61802	7.17348	3.0762
chrY	6095252	6098058	H33_peak_183	36	.	5.9272	7.82007	3.60139
chrY	6099002	6099463	H33_peak_183	36	.	5.9272	7.82007	3.60139
chrY	6101761	6102800	H33_peak_184	24	.	5.18148	6.54808	2.49385
chrY	6110979	6111261	H33_peak_186	32	.	5.68397	7.37193	3.20508
chrY	6113199	6113639	H33_peak_187	37	.	5.92864	8.00876	3.77792
chrY	6114596	6115449	H33_peak_187	37	.	5.92864	8.00876	3.77792
chrY	6118568	6119997	H33_peak_188	43	.	6.3435	8.61117	4.33108
chrY	6130543	6131029	H33_peak_189	46	.	6.53149	9.0452	4.67952
chrY	6132451	6132733	H33_peak_190	28	.	5.47118	6.97869	2.86625
chrY	6180877	6181202	H33_peak_191	39	.	6.18512	8.25084	3.9738
chrY	6237536	6237835	H33_peak_192	50	.	6.79537	9.40271	5.07066
chrY	6285113	6285722	H33_peak_193	53	.	6.95227	9.76657	5.32102
chrY	6307797	6308141	H33_peak_196	27	.	5.23954	6.87071	2.76767
chrY	6336624	6337234	H33_peak_197	32	.	5.68795	7.44171	3.26727
chrY	6364476	6365651	H33_peak_199	24	.	5.08324	6.49073	2.44357
chrY	6370906	6371939	H33_peak_200	23	.	5.08886	6.37997	2.35221
chrY	6373681	6373938	H33_peak_201	38	.	6.09427	8.11409	3.85004
chrY	6392244	6393338	H33_peak_202	34	.	5.77184	7.58972	3.40179
chrY	6416329	6416810	H33_peak_204	48	.	6.6569	9.24704	4.85933
chrY	6419645	6419949	H33_peak_205	33	.	5.7744	7.48678	3.30193
chrY	6439271	6439503	H33_peak_206	31	.	5.62486	7.27645	3.12178
chrY	6450174	6452077	H33_peak_207	35	.	5.7591	7.68494	3.51024
chrY	6457631	6459810	H33_peak_208	25	.	5.20684	6.63047	2.562
chrY	6474536	6475773	H33_peak_209	24	.	5.24018	6.53288	2.47816
chrY	6481219	6481934	H33_peak_210	27	.	5.37572	6.89195	2.78585
chrY	6486059	6486373	H33_peak_211	24	.	5.04596	6.48957	2.44148
chrY	6489803	6490455	H33_peak_212	29	.	5.4218	7.03999	2.91893
chrY	6492336	6492561	H33_peak_212	29	.	5.4218	7.03999	2.91893
chrY	6500209	6502169	H33_peak_215	26	.	5.32394	6.74315	2.66237
chrY	6505157	6506482	H33_peak_216	27	.	5.31004	6.8466	2.75042
chrY	6510049	6511661	H33_peak_218	44	.	6.466	8.78576	4.44617
chrY	6515644	6515871	H33_peak_220	22	.	4.84747	6.15275	2.24463
chrY	6667991	6668688	H33_peak_235	27	.	5.34925	6.84151	2.74643
chrY	6669965	6689010	H33_peak_236	55	.	7.01447	9.97191	5.51782
chrY	6690242	6691605	H33_peak_237	35	.	5.75548	7.62451	3.5436
chrY	6695013	6698090	H33_peak_238	49	.	6.6959	9.30252	4.92292
chrY	6699399	6701417	H33_peak_239	38	.	6.03897	8.10795	3.85767
chrY	6703912	6706041	H33_peak_240	54	.	6.90332	9.84069	5.42022
chrY	6707818	6712731	H33_peak_241	37	.	5.94384	7.93912	3.71929
chrY	6713728	6714168	H33_peak_241	37	.	5.94384	7.93912	3.71929
chrY	6715259	6716014	H33_peak_242	50	.	6.73265	9.41702	5.01285
chrY	6716927	6718434	H33_peak_242	50	.	6.73265	9.41702	5.01285
chrY	6719645	6719923	H33_peak_243	50	.	6.7816	9.43021	5.02398
chrY	6721254	6728907	H33_peak_244	49	.	6.65574	9.3167	4.94498
chrY	6730693	6731357	H33_peak_245	63	.	7.54513	10.9235	6.36003
chrY	6732282	6736184	H33_peak_246	60	.	7.30641	10.5219	6.00424
chrY	6737105	6739882	H33_peak_247	39	.	6.0607	8.16876	3.92246
chrY	6740813	6742725	H33_peak_248	47	.	6.59665	9.088	4.71619
chrY	6744117	6745093	H33_peak_249	51	.	6.82791	9.54652	5.12048
chrY	6747322	6748310	H33_peak_250	35	.	5.89502	7.82319	3.59925
chrY	6751833	6760185	H33_peak_251	64	.	7.51451	10.9984	6.44505
chrY	6846181	6847592	H33_peak_255	74	.	8.02429	12.1269	7.47983
chrY	6848955	6849539	H33_peak_256	42	.	6.29297	8.54019	4.22639
chrY	6853540	6855171	H33_peak_257	34	.	5.84246	7.67597	3.46677
chrY	6858364	6859318	H33_peak_258	25	.	5.30001	6.61468	2.55477
chrY	6867582	6870559	H33_peak_259	33	.	5.67082	7.48036	3.30682
chrY	6864673	6865347	H33_peak_259	33	.	5.67082	7.48036	3.30682
chrY	6876828	6879067	H33_peak_260	38	.	6.05192	8.15796	3.89905
chrY	6882745	6893935	H33_peak_261	35	.	5.82795	7.71316	3.51297
chrY	6899390	6899631	H33_peak_263	51	.	6.85644	9.49019	5.13876
chrY	6901876	6902264	H33_peak_264	25	.	5.09928	6.60626	2.54135
chrY	6903272	6911772	H33_peak_265	48	.	6.64649	9.25358	4.88404
chrY	6916749	6918274	H33_peak_266	31	.	5.58103	7.27579	3.12309
chrY	6912819	6915831	H33_peak_266	31	.	5.58103	7.27579	3.12309
chrY	6919973	6922111	H33_peak_267	36	.	5.89613	7.83435	3.61783
chrY	6965663	6965981	H33_peak_269	28	.	5.40037	6.9527	2.84156
chrY	6971686	6972384	H33_peak_270	23	.	5.11509	6.38602	2.35287
chrY	9085565	9085868	H33_peak_317	41	.	6.24511	8.34443	4.17808
chrY	9087976	9088404	H33_peak_318	23	.	4.95812	6.18562	2.31614
chrY	9099524	9099814	H33_peak_319	31	.	5.57277	7.31157	3.14946
chrY	9129101	9129877	H33_peak_320	38	.	6.08047	8.16178	3.89092
chrY	9144326	9144597	H33_peak_321	52	.	6.90116	9.65895	5.22004
chrY	9164684	9168285	H33_peak_322	34	.	5.7694	7.6359	3.44575
chrY	9169615	9170000	H33_peak_323	35	.	5.78349	7.75129	3.53793
chrY	9193671	9194150	H33_peak_324	37	.	5.99238	7.96215	3.73078
chrY	9197796	9198926	H33_peak_325	30	.	5.62468	7.15566	3.02952
chrY	9205149	9206446	H33_peak_326	58	.	7.20504	10.3588	5.8783
chrY	9207546	9207809	H33_peak_327	69	.	7.8094	11.5427	6.92486
chrY	9350122	9350372	H33_peak_328	36	.	5.87561	7.79446	3.64936
chrY	9489993	9490892	H33_peak_331	41	.	6.21922	8.48699	4.18334
chrY	9496145	9496466	H33_peak_332	36	.	5.86908	7.80178	3.64643
chrY	9500480	9501082	H33_peak_333	27	.	5.29592	6.8171	2.78689
chrY	9530811	9531254	H33_peak_335	28	.	5.44156	6.99836	2.88278
chrY	9555042	9555529	H33_peak_336	56	.	7.15814	10.1419	5.65878
chrY	9588179	9588697	H33_peak_338	44	.	6.36491	8.77679	4.44443
chrY	9989873	9990254	H33_peak_340	22	.	4.97173	6.216	2.20736
chrY	9999519	10001462	H33_peak_342	58	.	7.21781	10.3244	5.83241
chrY	10011532	10012141	H33_peak_343	32	.	5.68982	7.45473	3.27382
chrY	10014283	10015445	H33_peak_344	41	.	6.22031	8.40221	4.10811
chrY	10017719	10017950	H33_peak_345	34	.	5.65261	7.63392	3.43998
chrY	10019602	10019844	H33_peak_346	27	.	5.4059	6.88868	2.78532
chrY	10021122	10021511	H33_peak_346	27	.	5.4059	6.88868	2.78532
chrY	10023188	10023670	H33_peak_347	44	.	6.36151	8.80854	4.47274
chrY	10038794	10039262	H33_peak_348	42	.	6.28992	8.61153	4.28736
chrY	10055184	10055622	H33_peak_349	32	.	5.67398	7.43291	3.25683
chrY	10059623	10060801	H33_peak_350	24	.	5.20884	6.48021	2.43413
chrY	10062476	10063225	H33_peak_351	39	.	6.15984	8.24031	3.96544
chrY	10082539	10082811	H33_peak_352	42	.	6.35006	8.53944	4.22381
chrY	10318266	10322299	H33_peak_355	50	.	6.78113	9.5012	5.09129
chrY	10323906	10325642	H33_peak_356	29	.	5.41924	7.12348	2.99545
chrY	10327249	10327821	H33_peak_357	42	.	6.34698	8.49368	4.21259
chrY	10354760	10356284	H33_peak_358	48	.	6.59009	9.21616	4.84206
chrY	10357393	10357972	H33_peak_359	35	.	5.91008	7.79846	3.584
chrY	10359038	10360070	H33_peak_360	54	.	6.91951	9.80455	5.40711
chrY	10361090	10364848	H33_peak_361	44	.	6.39417	8.79379	4.47528
chrY	10366395	10366674	H33_peak_362	26	.	5.22434	6.68656	2.68903
chrY	10382411	10382826	H33_peak_364	38	.	6.03159	8.08924	3.83407
chrY	10394073	10394729	H33_peak_365	27	.	5.3946	6.88929	2.7873
chrY	10397934	10398383	H33_peak_366	22	.	5.04011	6.26413	2.24856
chrY	10418332	10424546	H33_peak_368	49	.	6.67553	9.37289	4.99891
chrY	10558449	10558675	H33_peak_369	30	.	5.52034	7.20167	3.0537

## Sheet: Arid1acKO_commonPks_rel2rabIgG
Chromosome	Start	End	Name	Score	Strand	Signal Value	pValue (-log10)	qValue (-log10)
chr1	4571710	4571974	H33_peak_2	21	.	2.90612	5.26082	2.10672
chr1	4785432	4785842	H33_peak_3	31	.	4.03417	6.24887	3.11633
chr1	4785465	4785714	H33_peak_3	31	.	4.03417	6.24887	3.11633
chr1	5071982	5072266	H33_peak_5	21	.	2.90612	5.26082	2.10672
chr1	5071982	5072266	H33_peak_5	21	.	2.90612	5.26082	2.10672
chr1	5083137	5083565	H33_peak_6	62	.	5.79674	9.7958	6.21473
chr1	6214238	6215281	H33_peak_7	56	.	5.09749	9.18173	5.65422
chr1	6214238	6215281	H33_peak_7	56	.	5.09749	9.18173	5.65422
chr1	6382803	6383368	H33_peak_8	32	.	3.49514	6.53827	3.23705
chr1	6382823	6383259	H33_peak_8	32	.	3.49514	6.53827	3.23705
chr1	7398099	7398440	H33_peak_9	47	.	5.33645	8.10325	4.71787
chr1	7398099	7398440	H33_peak_9	47	.	5.33645	8.10325	4.71787
chr1	9699847	9700991	H33_peak_10	76	.	5.57189	11.4499	7.69345
chr1	9699802	9700891	H33_peak_10	76	.	5.57189	11.4499	7.69345
chr1	9748025	9748384	H33_peak_11	28	.	3.54174	5.93634	2.82968
chr1	9748025	9748387	H33_peak_11	28	.	3.54174	5.93634	2.82968
chr1	9848193	9848536	H33_peak_12	27	.	3.95499	5.87926	2.79438
chr1	9848149	9848536	H33_peak_12	27	.	3.95499	5.87926	2.79438
chr1	9943843	9944184	H33_peak_13	80	.	7.10336	11.7927	8.05275
chr1	9943843	9944184	H33_peak_13	80	.	7.10336	11.7927	8.05275
chr1	9967484	9968288	H33_peak_14	27	.	3.32326	5.89185	2.79403
chr1	9967484	9968279	H33_peak_14	27	.	3.32326	5.89185	2.79403
chr1	10039643	10040226	H33_peak_15	50	.	4.33974	8.50116	5.00902
chr1	10039791	10040218	H33_peak_15	50	.	4.33974	8.50116	5.00902
chr1	10232159	10233054	H33_peak_16	31	.	3.45716	6.46419	3.17415
chr1	10232159	10233054	H33_peak_16	31	.	3.45716	6.46419	3.17415
chr1	11783579	11783607	H33_peak_17	19	.	2.87245	4.86855	1.91281
chr1	11783107	11783582	H33_peak_17	19	.	2.87245	4.86855	1.91281
chr1	13372606	13372974	H33_peak_18	31	.	3.93589	6.27563	3.12718
chr1	13372606	13372974	H33_peak_18	31	.	3.93589	6.27563	3.12718
chr1	13373956	13374674	H33_peak_19	23	.	3.28018	5.48001	2.39247
chr1	13373956	13374567	H33_peak_19	23	.	3.28018	5.48001	2.39247
chr1	13589177	13590077	H33_peak_20	42	.	3.95115	7.6319	4.23087
chr1	13589211	13590077	H33_peak_20	42	.	3.95115	7.6319	4.23087
chr1	15805630	15805906	H33_peak_22	38	.	3.81515	7.24077	3.86134
chr1	15805673	15805906	H33_peak_22	38	.	3.81515	7.24077	3.86134
chr1	15892690	15892865	H33_peak_23	32	.	3.98452	6.40858	3.20055
chr1	16105071	16105708	H33_peak_24	29	.	3.64676	6.15614	2.95631
chr1	16105071	16105708	H33_peak_24	29	.	3.64676	6.15614	2.95631
chr1	16618779	16619334	H33_peak_25	65	.	5.12454	10.2643	6.58488
chr1	16618779	16619334	H33_peak_25	65	.	5.12454	10.2643	6.58488
chr1	16665199	16665658	H33_peak_26	55	.	4.64514	9.12647	5.55526
chr1	16665199	16665643	H33_peak_26	55	.	4.64514	9.12647	5.55526
chr1	21079105	21079583	H33_peak_29	35	.	3.69443	6.91397	3.58263
chr1	21079105	21079583	H33_peak_29	35	.	3.69443	6.91397	3.58263
chr1	23102019	23102251	H33_peak_31	100	.	7.55517	13.9176	10.0079
chr1	23101987	23102251	H33_peak_31	100	.	7.55517	13.9176	10.0079
chr1	23255967	23256999	H33_peak_32	74	.	5.45357	11.2193	7.49595
chr1	23255967	23256999	H33_peak_32	74	.	5.45357	11.2193	7.49595
chr1	23307128	23307301	H33_peak_33	18	.	3.49872	4.8103	1.8978
chr1	23761855	23762436	H33_peak_34	19	.	2.88414	5.01069	1.96245
chr1	23761798	23762199	H33_peak_34	19	.	2.88414	5.01069	1.96245
chr1	23921919	23922130	H33_peak_35	37	.	3.81376	7.1105	3.76047
chr1	23921919	23922130	H33_peak_35	37	.	3.81376	7.1105	3.76047
chr1	24076036	24076254	H33_peak_36	16	.	2.83201	4.47832	1.60995
chr1	24075996	24076254	H33_peak_36	16	.	2.83201	4.47832	1.60995
chr1	24099815	24100620	H33_peak_37	87	.	6.26838	12.5752	8.75232
chr1	24099815	24100620	H33_peak_37	87	.	6.26838	12.5752	8.75232
chr1	24678642	24678990	H33_peak_38	52	.	4.79269	8.68266	5.2321
chr1	24678642	24678908	H33_peak_38	52	.	4.79269	8.68266	5.2321
chr1	27159592	27160051	H33_peak_39	26	.	3.25911	5.86554	2.66645
chr1	30873721	30873990	H33_peak_40	28	.	4.17024	6.01968	2.89304
chr1	30873721	30873990	H33_peak_40	28	.	4.17024	6.01968	2.89304
chr1	30949806	30950155	H33_peak_41	35	.	3.65832	6.88642	3.54328
chr1	30949806	30950155	H33_peak_41	35	.	3.65832	6.88642	3.54328
chr1	31700755	31701052	H33_peak_43	31	.	3.63113	6.26767	3.12569
chr1	31701000	31701052	H33_peak_43	31	.	3.63113	6.26767	3.12569
chr1	32172456	32172696	H33_peak_44	38	.	3.79264	7.20106	3.8291
chr1	32172537	32172696	H33_peak_44	38	.	3.79264	7.20106	3.8291
chr1	33407451	33407708	H33_peak_45	26	.	3.87152	5.74991	2.60382
chr1	33719845	33720231	H33_peak_46	31	.	3.65826	6.37003	3.1621
chr1	33719743	33720231	H33_peak_46	31	.	3.65826	6.37003	3.1621
chr1	33757419	33757707	H33_peak_47	21	.	2.90612	5.26082	2.10672
chr1	33757500	33757707	H33_peak_47	21	.	2.90612	5.26082	2.10672
chr1	33814005	33814283	H33_peak_48	19	.	3.25037	4.86814	1.94343
chr1	33814152	33814283	H33_peak_48	19	.	3.25037	4.86814	1.94343
chr1	34750205	34751001	H33_peak_49	21	.	2.90612	5.26082	2.10672
chr1	34750252	34750964	H33_peak_49	21	.	2.90612	5.26082	2.10672
chr1	34850050	34850268	H33_peak_50	21	.	2.90612	5.26082	2.10672
chr1	34850050	34850268	H33_peak_50	21	.	2.90612	5.26082	2.10672
chr1	36243909	36244294	H33_peak_52	34	.	3.62572	6.81598	3.48103
chr1	36243909	36244294	H33_peak_52	34	.	3.62572	6.81598	3.48103
chr1	36307630	36308074	H33_peak_53	19	.	3.24792	4.86692	1.94234
chr1	36307630	36308176	H33_peak_53	19	.	3.24792	4.86692	1.94234
chr1	36444867	36445317	H33_peak_54	66	.	6.29336	10.2133	6.62976
chr1	36444867	36445317	H33_peak_54	66	.	6.29336	10.2133	6.62976
chr1	36471368	36471554	H33_peak_55	37	.	3.75153	7.1296	3.77151
chr1	36471334	36471554	H33_peak_55	37	.	3.75153	7.1296	3.77151
chr1	36511376	36512109	H33_peak_56	59	.	4.82106	9.59391	5.98946
chr1	36511525	36511985	H33_peak_56	59	.	4.82106	9.59391	5.98946
chr1	36547013	36547221	H33_peak_57	46	.	5.12077	8.00006	4.60036
chr1	36558175	36558378	H33_peak_58	28	.	3.27833	6.06521	2.81757
chr1	36558175	36558378	H33_peak_58	28	.	3.27833	6.06521	2.81757
chr1	36691304	36691791	H33_peak_59	59	.	5.25064	9.4542	5.93033
chr1	36691304	36691791	H33_peak_59	59	.	5.25064	9.4542	5.93033
chr1	36709660	36710134	H33_peak_60	75	.	5.61353	11.2465	7.52794
chr1	36709654	36710089	H33_peak_60	75	.	5.61353	11.2465	7.52794
chr1	36939435	36940167	H33_peak_61	103	.	8.16322	14.3068	10.3872
chr1	36939436	36940167	H33_peak_61	103	.	8.16322	14.3068	10.3872
chr1	37299805	37300107	H33_peak_62	51	.	4.38163	8.62022	5.11761
chr1	37299805	37300107	H33_peak_62	51	.	4.38163	8.62022	5.11761
chr1	37429792	37430735	H33_peak_63	32	.	3.93831	6.41117	3.25346
chr1	37429792	37430735	H33_peak_63	32	.	3.93831	6.41117	3.25346
chr1	37864590	37865411	H33_peak_64	49	.	5.02193	8.44396	4.99507
chr1	37864590	37865411	H33_peak_64	49	.	5.02193	8.44396	4.99507
chr1	37997803	37998588	H33_peak_65	63	.	4.99284	9.98034	6.33485
chr1	37997803	37998588	H33_peak_65	63	.	4.99284	9.98034	6.33485
chr1	38128984	38129278	H33_peak_66	20	.	3.24668	5.13274	2.09155
chr1	38128984	38129278	H33_peak_66	20	.	3.24668	5.13274	2.09155
chr1	38626917	38627128	H33_peak_68	40	.	4.1482	7.31619	4.01968
chr1	38987625	38988067	H33_peak_69	36	.	3.77349	6.83622	3.64737
chr1	38987625	38988067	H33_peak_69	36	.	3.77349	6.83622	3.64737
chr1	39367941	39368274	H33_peak_71	39	.	3.84253	7.31642	3.93346
chr1	39367941	39368274	H33_peak_71	39	.	3.84253	7.31642	3.93346
chr1	39478166	39478854	H33_peak_72	26	.	3.16901	5.82896	2.6088
chr1	39478526	39478854	H33_peak_72	26	.	3.16901	5.82896	2.6088
chr1	39535579	39536208	H33_peak_73	34	.	4.08275	6.69208	3.45736
chr1	39535579	39536208	H33_peak_73	34	.	4.08275	6.69208	3.45736
chr1	39576720	39577294	H33_peak_74	20	.	3.02518	5.02468	2.06144
chr1	39576720	39577537	H33_peak_74	20	.	3.02518	5.02468	2.06144
chr1	42334617	42335008	H33_peak_75	24	.	3.09157	5.54463	2.47476
chr1	42851226	42851509	H33_peak_76	29	.	3.54815	6.12718	2.97015
chr1	42851226	42851509	H33_peak_76	29	.	3.54815	6.12718	2.97015
chr1	43098461	43099025	H33_peak_77	72	.	5.39868	11.0164	7.29327
chr1	43098423	43099025	H33_peak_77	72	.	5.39868	11.0164	7.29327
chr1	43827761	43828035	H33_peak_78	19	.	2.88417	5.01101	1.96264
chr1	43933890	43934468	H33_peak_79	33	.	3.52703	6.62092	3.31448
chr1	43933890	43934465	H33_peak_79	33	.	3.52703	6.62092	3.31448
chr1	44102037	44102472	H33_peak_80	94	.	6.40904	13.3551	9.40064
chr1	44102121	44102472	H33_peak_80	94	.	6.40904	13.3551	9.40064
chr1	44959917	44959929	H33_peak_81	17	.	2.85429	4.67076	1.76639
chr1	44959780	44959929	H33_peak_81	17	.	2.85429	4.67076	1.76639
chr1	45795369	45795868	H33_peak_82	75	.	5.53172	11.281	7.51695
chr1	45795369	45795798	H33_peak_82	75	.	5.53172	11.281	7.51695
chr1	46450031	46450110	H33_peak_83	15	.	2.82683	4.43654	1.56845
chr1	46853482	46853939	H33_peak_84	21	.	3.00405	5.29172	2.18909
chr1	46853482	46853973	H33_peak_84	21	.	3.00405	5.29172	2.18909
chr1	47106034	47106314	H33_peak_86	20	.	2.88952	5.04323	2.09933
chr1	50927016	50927907	H33_peak_88	28	.	3.27778	6.06403	2.81653
chr1	50927357	50927794	H33_peak_88	28	.	3.27778	6.06403	2.81653
chr1	51478160	51478425	H33_peak_89	21	.	3.49582	5.10999	2.14055
chr1	51915876	51916082	H33_peak_90	26	.	3.18356	5.86041	2.63659
chr1	52113784	52114002	H33_peak_91	23	.	3.03942	5.54891	2.36132
chr1	52113784	52114002	H33_peak_91	23	.	3.03942	5.54891	2.36132
chr1	52232230	52233514	H33_peak_92	30	.	3.43752	6.33125	3.09629
chr1	52232230	52233250	H33_peak_92	30	.	3.43752	6.33125	3.09629
chr1	52500706	52500916	H33_peak_93	20	.	2.89713	5.15851	2.04772
chr1	52630609	52630879	H33_peak_94	24	.	3.11666	5.57298	2.43406
chr1	52630609	52630879	H33_peak_94	24	.	3.11666	5.57298	2.43406
chr1	53296741	53297311	H33_peak_95	44	.	4.98675	7.79919	4.46417
chr1	53296741	53297282	H33_peak_95	44	.	4.98675	7.79919	4.46417
chr1	53784805	53785119	H33_peak_96	25	.	3.93711	5.65044	2.58652
chr1	53784768	53785398	H33_peak_96	25	.	3.93711	5.65044	2.58652
chr1	54194926	54195056	H33_peak_97	21	.	2.90612	5.26082	2.10672
chr1	55026947	55027505	H33_peak_98	30	.	4.06933	6.22442	3.06623
chr1	55026947	55027505	H33_peak_98	30	.	4.06933	6.22442	3.06623
chr1	55052742	55053318	H33_peak_99	39	.	4.4289	7.26064	3.96048
chr1	55052742	55053318	H33_peak_99	39	.	4.4289	7.26064	3.96048
chr1	55088219	55088537	H33_peak_100	47	.	4.46753	8.179	4.73133
chr1	55088219	55088537	H33_peak_100	47	.	4.46753	8.179	4.73133
chr1	55131153	55131776	H33_peak_101	34	.	4.04145	6.70941	3.44436
chr1	55131153	55131769	H33_peak_101	34	.	4.04145	6.70941	3.44436
chr1	55362781	55363205	H33_peak_102	41	.	3.93422	7.52477	4.12045
chr1	55362781	55363205	H33_peak_102	41	.	3.93422	7.52477	4.12045
chr1	57377704	57377924	H33_peak_104	33	.	4.28648	6.52881	3.32096
chr1	57377704	57377926	H33_peak_104	33	.	4.28648	6.52881	3.32096
chr1	57406552	57406964	H33_peak_105	36	.	3.93178	6.87753	3.60519
chr1	57406470	57406964	H33_peak_105	36	.	3.93178	6.87753	3.60519
chr1	57996101	57996377	H33_peak_106	19	.	3.20453	4.84529	1.92294
chr1	58392619	58393346	H33_peak_107	99	.	6.59172	13.9629	9.99695
chr1	58392619	58393344	H33_peak_107	99	.	6.59172	13.9629	9.99695
chr1	58423501	58423979	H33_peak_108	50	.	4.48785	8.49675	5.00305
chr1	58423605	58423995	H33_peak_108	50	.	4.48785	8.49675	5.00305
chr1	58504507	58505117	H33_peak_109	93	.	7.35846	13.1912	9.32144
chr1	58504575	58505117	H33_peak_109	93	.	7.35846	13.1912	9.32144
chr1	58586078	58586289	H33_peak_110	21	.	2.90612	5.26082	2.10672
chr1	58586078	58586287	H33_peak_110	21	.	2.90612	5.26082	2.10672
chr1	58973091	58973820	H33_peak_111	79	.	5.75834	11.744	7.91835
chr1	58973230	58973820	H33_peak_111	79	.	5.75834	11.744	7.91835
chr1	59119771	59120554	H33_peak_112	49	.	4.35732	8.4846	4.98206
chr1	59119771	59120388	H33_peak_112	49	.	4.35732	8.4846	4.98206
chr1	59236870	59237249	H33_peak_113	30	.	3.99223	6.16771	3.0233
chr1	59236882	59237249	H33_peak_113	30	.	3.99223	6.16771	3.0233
chr1	59670321	59670822	H33_peak_114	79	.	5.97139	11.6818	7.90149
chr1	59670326	59670822	H33_peak_114	79	.	5.97139	11.6818	7.90149
chr1	59763409	59763914	H33_peak_115	21	.	2.90612	5.26082	2.10672
chr1	59763244	59763914	H33_peak_115	21	.	2.90612	5.26082	2.10672
chr1	59912586	59913746	H33_peak_116	44	.	4.18381	7.69925	4.41054
chr1	59912571	59913940	H33_peak_116	44	.	4.18381	7.69925	4.41054
chr1	60098280	60098744	H33_peak_117	25	.	3.1661	5.75641	2.57068
chr1	60098170	60098780	H33_peak_117	25	.	3.1661	5.75641	2.57068
chr1	60180236	60180659	H33_peak_118	55	.	4.78019	9.11922	5.56793
chr1	60180236	60180645	H33_peak_118	55	.	4.78019	9.11922	5.56793
chr1	60343129	60343578	H33_peak_119	20	.	2.89267	5.10771	2.01842
chr1	60343129	60343578	H33_peak_119	20	.	2.89267	5.10771	2.01842
chr1	60409431	60410246	H33_peak_120	34	.	3.82849	6.63933	3.42292
chr1	60409345	60410119	H33_peak_120	34	.	3.82849	6.63933	3.42292
chr1	63113339	63114373	H33_peak_122	33	.	3.58309	6.6379	3.34887
chr1	63113323	63114373	H33_peak_122	33	.	3.58309	6.6379	3.34887
chr1	63177272	63177443	H33_peak_123	60	.	4.84754	9.61642	6.00312
chr1	63177272	63177286	H33_peak_123	60	.	4.84754	9.61642	6.00312
chr1	63886344	63886652	H33_peak_124	25	.	4.08327	5.58759	2.50371
chr1	64532433	64532954	H33_peak_127	35	.	3.61782	6.83405	3.50757
chr1	64532433	64532954	H33_peak_127	35	.	3.61782	6.83405	3.50757
chr1	64736113	64736298	H33_peak_128	21	.	2.90612	5.26082	2.10672
chr1	64737331	64737822	H33_peak_129	21	.	2.90612	5.26082	2.10672
chr1	64737331	64737822	H33_peak_129	21	.	2.90612	5.26082	2.10672
chr1	65186610	65187067	H33_peak_130	127	.	7.75176	16.9604	12.7886
chr1	65186610	65187067	H33_peak_130	127	.	7.75176	16.9604	12.7886
chr1	65979532	65979994	H33_peak_131	22	.	3.38902	5.28915	2.29353
chr1	66700743	66701003	H33_peak_132	38	.	4.4929	7.14264	3.85438
chr1	66700743	66701003	H33_peak_132	38	.	4.4929	7.14264	3.85438
chr1	66817118	66818032	H33_peak_133	45	.	4.15613	8.02245	4.56546
chr1	66817118	66817975	H33_peak_133	45	.	4.15613	8.02245	4.56546
chr1	67038620	67038880	H33_peak_134	83	.	5.93146	12.1764	8.31179
chr1	67038620	67038880	H33_peak_134	83	.	5.93146	12.1764	8.31179
chr1	69826893	69827206	H33_peak_135	34	.	3.57461	6.72961	3.4124
chr1	69826893	69827206	H33_peak_135	34	.	3.57461	6.72961	3.4124
chr1	71102664	71102992	H33_peak_136	30	.	3.9361	6.23539	3.05789
chr1	71102664	71102992	H33_peak_136	30	.	3.9361	6.23539	3.05789
chr1	72211820	72212032	H33_peak_137	21	.	2.90612	5.26082	2.10672
chr1	72211880	72212032	H33_peak_137	21	.	2.90612	5.26082	2.10672
chr1	74236517	74237121	H33_peak_138	35	.	3.63045	6.84987	3.51854
chr1	74236528	74237113	H33_peak_138	35	.	3.63045	6.84987	3.51854
chr1	74332437	74332686	H33_peak_139	37	.	4.07068	7.0112	3.7521
chr1	74332437	74332686	H33_peak_139	37	.	4.07068	7.0112	3.7521
chr1	74391329	74392208	H33_peak_140	29	.	3.36592	6.20219	2.95844
chr1	74391361	74392208	H33_peak_140	29	.	3.36592	6.20219	2.95844
chr1	74397247	74397488	H33_peak_141	49	.	4.33707	8.40862	4.90613
chr1	74397247	74397488	H33_peak_141	49	.	4.33707	8.40862	4.90613
chr1	74505514	74506741	H33_peak_142	46	.	4.16369	8.09566	4.64286
chr1	74505514	74506741	H33_peak_142	46	.	4.16369	8.09566	4.64286
chr1	74587717	74588053	H33_peak_143	44	.	4.7363	7.7817	4.42767
chr1	74587717	74588053	H33_peak_143	44	.	4.7363	7.7817	4.42767
chr1	74817054	74817259	H33_peak_145	36	.	3.72429	6.99167	3.65043
chr1	74817054	74817256	H33_peak_145	36	.	3.72429	6.99167	3.65043
chr1	75142663	75143256	H33_peak_146	25	.	3.35169	5.58928	2.51238
chr1	75142663	75143256	H33_peak_146	25	.	3.35169	5.58928	2.51238
chr1	75168674	75168958	H33_peak_147	72	.	6.05906	10.8955	7.22606
chr1	75182827	75183076	H33_peak_148	33	.	3.54526	6.64209	3.32736
chr1	75210802	75211102	H33_peak_149	52	.	4.52231	8.71822	5.20524
chr1	75210802	75211104	H33_peak_149	52	.	4.52231	8.71822	5.20524
chr1	75219757	75219772	H33_peak_150	21	.	2.90612	5.26082	2.10672
chr1	75236199	75236950	H33_peak_151	35	.	3.65652	6.92761	3.59318
chr1	75236435	75236981	H33_peak_151	35	.	3.65652	6.92761	3.59318
chr1	75317180	75318148	H33_peak_152	74	.	6.17284	11.1179	7.44422
chr1	75317189	75318083	H33_peak_152	74	.	6.17284	11.1179	7.44422
chr1	75479115	75479606	H33_peak_153	33	.	3.97137	6.53361	3.31213
chr1	75479115	75479606	H33_peak_153	33	.	3.97137	6.53361	3.31213
chr1	75506057	75506338	H33_peak_155	30	.	3.51177	6.1948	3.08554
chr1	75506057	75506338	H33_peak_155	30	.	3.51177	6.1948	3.08554
chr1	75546310	75546562	H33_peak_156	21	.	2.90612	5.26082	2.10672
chr1	75714287	75714786	H33_peak_157	16	.	3.69788	4.50727	1.62776
chr1	75714677	75714786	H33_peak_157	16	.	3.69788	4.50727	1.62776
chr1	78488664	78488885	H33_peak_158	34	.	4.67576	6.70748	3.46559
chr1	78488664	78488885	H33_peak_158	34	.	4.67576	6.70748	3.46559
chr1	78657882	78658332	H33_peak_159	26	.	4.1116	5.76637	2.67976
chr1	78657882	78658229	H33_peak_159	26	.	4.1116	5.76637	2.67976
chr1	79381006	79381316	H33_peak_160	16	.	2.84049	4.54824	1.67851
chr1	79776045	79776459	H33_peak_161	79	.	5.6929	11.695	7.90143
chr1	79776045	79776459	H33_peak_161	79	.	5.6929	11.695	7.90143
chr1	80340704	80340994	H33_peak_162	58	.	4.7946	9.39578	5.80571
chr1	80340816	80341040	H33_peak_162	58	.	4.7946	9.39578	5.80571
chr1	82316521	82316979	H33_peak_163	67	.	6.70633	10.3885	6.78753
chr1	82316520	82316979	H33_peak_163	67	.	6.70633	10.3885	6.78753
chr1	84695571	84695855	H33_peak_165	27	.	3.26093	6.03773	2.79652
chr1	84695569	84695927	H33_peak_165	27	.	3.26093	6.03773	2.79652
chr1	84838734	84840313	H33_peak_166	40	.	4.06134	7.43058	4.0541
chr1	84838821	84840220	H33_peak_166	40	.	4.06134	7.43058	4.0541
chr1	85793457	85793997	H33_peak_167	18	.	2.87057	4.85609	1.87328
chr1	85793457	85793967	H33_peak_167	18	.	2.87057	4.85609	1.87328
chr1	86064640	86065066	H33_peak_168	92	.	6.24458	13.121	9.22839
chr1	86064414	86065066	H33_peak_168	92	.	6.24458	13.121	9.22839
chr1	86154846	86155044	H33_peak_169	18	.	2.87369	4.89164	1.89379
chr1	86154846	86155184	H33_peak_169	18	.	2.87369	4.89164	1.89379
chr1	86358689	86359831	H33_peak_170	31	.	3.80219	6.33148	3.12574
chr1	86358750	86359831	H33_peak_170	31	.	3.80219	6.33148	3.12574
chr1	86434297	86434839	H33_peak_171	21	.	3.09894	5.15809	2.17607
chr1	86434297	86434839	H33_peak_171	21	.	3.09894	5.15809	2.17607
chr1	86487327	86487938	H33_peak_172	57	.	4.71986	9.34622	5.76317
chr1	86487327	86487938	H33_peak_172	57	.	4.71986	9.34622	5.76317
chr1	86504043	86504488	H33_peak_173	31	.	3.46927	6.48373	3.18929
chr1	86504043	86504504	H33_peak_173	31	.	3.46927	6.48373	3.18929
chr1	86525064	86525281	H33_peak_174	21	.	2.90612	5.26082	2.10672
chr1	86525064	86525281	H33_peak_174	21	.	2.90612	5.26082	2.10672
chr1	86526126	86528423	H33_peak_175	39	.	4.02179	7.30462	3.95207
chr1	86526126	86528423	H33_peak_175	39	.	4.02179	7.30462	3.95207
chr1	86582112	86582532	H33_peak_176	84	.	6.27281	12.3173	8.44972
chr1	86582112	86582532	H33_peak_176	84	.	6.27281	12.3173	8.44972
chr1	86670407	86670732	H33_peak_177	18	.	2.91752	4.77872	1.85461
chr1	87154558	87154859	H33_peak_178	39	.	3.86494	7.34578	3.97617
chr1	87154558	87154901	H33_peak_178	39	.	3.86494	7.34578	3.97617
chr1	87509816	87510027	H33_peak_179	18	.	2.86249	4.76009	1.83252
chr1	87509925	87510027	H33_peak_179	18	.	2.86249	4.76009	1.83252
chr1	87853047	87853942	H33_peak_180	27	.	3.23029	5.96139	2.72583
chr1	88205316	88205811	H33_peak_181	63	.	5.58002	9.94016	6.32873
chr1	88205316	88205811	H33_peak_181	63	.	5.58002	9.94016	6.32873
chr1	88701515	88701902	H33_peak_183	26	.	3.17138	5.83408	2.61332
chr1	89581060	89581584	H33_peak_184	28	.	3.29175	6.09421	2.8432
chr1	89581060	89581688	H33_peak_184	28	.	3.29175	6.09421	2.8432
chr1	90603471	90603719	H33_peak_185	24	.	3.58386	5.59389	2.46156
chr1	90603471	90603669	H33_peak_185	24	.	3.58386	5.59389	2.46156
chr1	91250292	91250555	H33_peak_186	19	.	3.52621	4.91475	1.92782
chr1	91398568	91398656	H33_peak_187	17	.	2.85429	4.67076	1.76639
chr1	91398633	91398875	H33_peak_187	17	.	2.85429	4.67076	1.76639
chr1	91412628	91413203	H33_peak_188	43	.	4.04021	7.76222	4.33335
chr1	91459100	91459444	H33_peak_189	54	.	4.59572	9.00841	5.44717
chr1	91459141	91459444	H33_peak_189	54	.	4.59572	9.00841	5.44717
chr1	91801262	91802050	H33_peak_190	21	.	2.90612	5.26082	2.10672
chr1	92180259	92181047	H33_peak_191	36	.	4.01087	6.91652	3.66741
chr1	92180305	92181047	H33_peak_191	36	.	4.01087	6.91652	3.66741
chr1	92473512	92473761	H33_peak_192	38	.	4.23338	7.13875	3.83705
chr1	92473444	92473761	H33_peak_192	38	.	4.23338	7.13875	3.83705
chr1	92641604	92641960	H33_peak_193	28	.	3.29562	6.10258	2.8506
chr1	92831278	92832815	H33_peak_194	21	.	2.93379	5.32063	2.15958
chr1	92831278	92832815	H33_peak_194	21	.	2.93379	5.32063	2.15958
chr1	92850207	92850487	H33_peak_195	21	.	2.90612	5.26082	2.10672
chr1	93342534	93342808	H33_peak_197	37	.	3.76522	7.11745	3.74744
chr1	93342590	93342808	H33_peak_197	37	.	3.76522	7.11745	3.74744
chr1	93445180	93445750	H33_peak_198	73	.	5.47535	11.0655	7.34493
chr1	93445193	93445750	H33_peak_198	73	.	5.47535	11.0655	7.34493
chr1	93477993	93479431	H33_peak_199	78	.	5.68693	11.609	7.80676
chr1	93478038	93479431	H33_peak_199	78	.	5.68693	11.609	7.80676
chr1	93511851	93512248	H33_peak_200	45	.	4.15299	8.01451	4.55833
chr1	93511851	93512248	H33_peak_200	45	.	4.15299	8.01451	4.55833
chr1	93635210	93635757	H33_peak_201	47	.	4.52627	8.19137	4.79299
chr1	93635293	93635757	H33_peak_201	47	.	4.52627	8.19137	4.79299
chr1	93755057	93755397	H33_peak_202	52	.	4.48453	8.80053	5.27292
chr1	93755057	93755364	H33_peak_202	52	.	4.48453	8.80053	5.27292
chr1	93801578	93801968	H33_peak_203	66	.	5.14159	10.3386	6.65754
chr1	93801721	93801968	H33_peak_203	66	.	5.14159	10.3386	6.65754
chr1	93803471	93804292	H33_peak_204	40	.	4.08532	7.38002	4.07642
chr1	93803666	93804292	H33_peak_204	40	.	4.08532	7.38002	4.07642
chr1	95517714	95517964	H33_peak_205	19	.	2.88294	4.99697	1.95454
chr1	95517714	95517964	H33_peak_205	19	.	2.88294	4.99697	1.95454
chr1	97769722	97770110	H33_peak_207	30	.	3.41044	6.35072	3.06988
chr1	97769722	97770054	H33_peak_207	30	.	3.41044	6.35072	3.06988
chr1	105663880	105664471	H33_peak_209	37	.	3.88976	7.01052	3.7439
chr1	105663880	105664471	H33_peak_209	37	.	3.88976	7.01052	3.7439
chr1	105990267	105991367	H33_peak_210	37	.	3.83785	7.10227	3.77653
chr1	105990267	105991367	H33_peak_210	37	.	3.83785	7.10227	3.77653
chr1	105993739	105993983	H33_peak_211	38	.	3.78162	7.18361	3.81572
chr1	106171538	106172661	H33_peak_212	37	.	3.7574	7.12942	3.76724
chr1	106171622	106172661	H33_peak_212	37	.	3.7574	7.12942	3.76724
chr1	106796308	106796628	H33_peak_213	34	.	4.5302	6.69058	3.48366
chr1	106796308	106796628	H33_peak_213	34	.	4.5302	6.69058	3.48366
chr1	106855037	106855361	H33_peak_214	28	.	3.29497	5.91668	2.83444
chr1	106855037	106855254	H33_peak_214	28	.	3.29497	5.91668	2.83444
chr1	107823473	107823688	H33_peak_215	21	.	3.58831	5.20022	2.18491
chr1	111864458	111865098	H33_peak_217	39	.	3.84303	7.33347	3.95298
chr1	111864458	111865098	H33_peak_217	39	.	3.84303	7.33347	3.95298
chr1	119421476	119421712	H33_peak_219	21	.	2.90001	5.1776	2.10672
chr1	119421476	119421712	H33_peak_219	21	.	2.90001	5.1776	2.10672
chr1	119504604	119504759	H33_peak_220	30	.	4.13341	6.18771	3.01262
chr1	119504545	119504759	H33_peak_220	30	.	4.13341	6.18771	3.01262
chr1	119525741	119526416	H33_peak_221	59	.	5.51467	9.4374	5.9054
chr1	119525750	119526416	H33_peak_221	59	.	5.51467	9.4374	5.9054
chr1	119648301	119649022	H33_peak_222	37	.	3.74584	7.11283	3.75526
chr1	119648456	119648988	H33_peak_222	37	.	3.74584	7.11283	3.75526
chr1	121327575	121328148	H33_peak_223	23	.	3.55974	5.34584	2.34064
chr1	121327575	121328148	H33_peak_223	23	.	3.55974	5.34584	2.34064
chr1	121431163	121431430	H33_peak_224	21	.	2.90612	5.26082	2.10672
chr1	121567651	121567936	H33_peak_225	36	.	3.69128	6.95764	3.60622
chr1	121567653	121567925	H33_peak_225	36	.	3.69128	6.95764	3.60622
chr1	122086464	122086797	H33_peak_226	41	.	4.19381	7.4745	4.13617
chr1	122086464	122086616	H33_peak_226	41	.	4.19381	7.4745	4.13617
chr1	125435282	125435974	H33_peak_227	63	.	5.0082	9.97721	6.32159
chr1	125435282	125435954	H33_peak_227	63	.	5.0082	9.97721	6.32159
chr1	125560312	125561386	H33_peak_228	71	.	5.335	10.8547	7.14596
chr1	125560312	125561386	H33_peak_228	71	.	5.335	10.8547	7.14596
chr1	126492733	126492943	H33_peak_229	21	.	2.90612	5.26082	2.10672
chr1	127773847	127774630	H33_peak_230	76	.	6.08045	11.4033	7.68826
chr1	127773893	127774630	H33_peak_230	76	.	6.08045	11.4033	7.68826
chr1	128103262	128103728	H33_peak_231	77	.	6.68449	11.4203	7.71532
chr1	128103262	128103728	H33_peak_231	77	.	6.68449	11.4203	7.71532
chr1	128244334	128244956	H33_peak_232	40	.	4.31789	7.32057	4.03114
chr1	128244334	128244956	H33_peak_232	40	.	4.31789	7.32057	4.03114
chr1	128359331	128359669	H33_peak_233	32	.	3.51657	6.58008	3.27257
chr1	128359331	128359669	H33_peak_233	32	.	3.51657	6.58008	3.27257
chr1	130717259	130717745	H33_peak_234	52	.	4.47478	8.76984	5.24054
chr1	130717259	130717737	H33_peak_234	52	.	4.47478	8.76984	5.24054
chr1	131137902	131138203	H33_peak_236	21	.	2.90612	5.26082	2.10672
chr1	131137902	131138203	H33_peak_236	21	.	2.90612	5.26082	2.10672
chr1	131526193	131528255	H33_peak_237	47	.	4.51699	8.19362	4.77948
chr1	131526193	131528255	H33_peak_237	47	.	4.51699	8.19362	4.77948
chr1	131827944	131828249	H33_peak_238	53	.	4.54235	8.90093	5.35498
chr1	131827944	131828244	H33_peak_238	53	.	4.54235	8.90093	5.35498
chr1	131910961	131911194	H33_peak_239	24	.	3.10881	5.61269	2.45032
chr1	131911026	131911194	H33_peak_239	24	.	3.10881	5.61269	2.45032
chr1	132417356	132417705	H33_peak_240	92	.	6.87763	13.1749	9.25627
chr1	132417356	132417705	H33_peak_240	92	.	6.87763	13.1749	9.25627
chr1	133024967	133025375	H33_peak_241	70	.	5.3255	10.7796	7.06123
chr1	133024992	133025311	H33_peak_241	70	.	5.3255	10.7796	7.06123
chr1	133046230	133046592	H33_peak_242	25	.	3.17855	5.7314	2.54579
chr1	133046230	133046476	H33_peak_242	25	.	3.17855	5.7314	2.54579
chr1	133131057	133131737	H33_peak_243	91	.	7.09852	13.0362	9.15595
chr1	133131033	133131737	H33_peak_243	91	.	7.09852	13.0362	9.15595
chr1	133660876	133661473	H33_peak_246	99	.	6.72332	13.8487	9.90742
chr1	133660876	133661473	H33_peak_246	99	.	6.72332	13.8487	9.90742
chr1	134361728	134362007	H33_peak_248	79	.	5.7914	11.82	7.9872
chr1	134361728	134362007	H33_peak_248	79	.	5.7914	11.82	7.9872
chr1	134405944	134406134	H33_peak_249	21	.	2.90612	5.26082	2.10672
chr1	134405931	134406131	H33_peak_249	21	.	2.90612	5.26082	2.10672
chr1	134455549	134455790	H33_peak_250	46	.	4.2004	8.09963	4.62873
chr1	134455549	134455726	H33_peak_250	46	.	4.2004	8.09963	4.62873
chr1	134494567	134495056	H33_peak_251	63	.	5.54949	9.89088	6.30608
chr1	134494567	134495056	H33_peak_251	63	.	5.54949	9.89088	6.30608
chr1	134556217	134557223	H33_peak_252	148	.	8.59413	19.101	14.8135
chr1	134556295	134557223	H33_peak_252	148	.	8.59413	19.101	14.8135
chr1	134560656	134561565	H33_peak_253	80	.	6.05804	11.8509	8.05695
chr1	134560656	134561565	H33_peak_253	80	.	6.05804	11.8509	8.05695
chr1	134955494	134955925	H33_peak_254	22	.	3.01372	5.28059	2.20049
chr1	134955520	134955925	H33_peak_254	22	.	3.01372	5.28059	2.20049
chr1	134987629	134987950	H33_peak_255	30	.	3.39499	6.31764	3.04074
chr1	134987629	134987950	H33_peak_255	30	.	3.39499	6.31764	3.04074
chr1	135147135	135147538	H33_peak_256	21	.	2.90612	5.26082	2.10672
chr1	135146985	135147251	H33_peak_256	21	.	2.90612	5.26082	2.10672
chr1	135430201	135430749	H33_peak_257	38	.	3.79214	7.23224	3.86614
chr1	135430240	135430760	H33_peak_257	38	.	3.79214	7.23224	3.86614
chr1	136131261	136131761	H33_peak_258	33	.	3.53913	6.64492	3.335
chr1	136131303	136131761	H33_peak_258	33	.	3.53913	6.64492	3.335
chr1	136234198	136234564	H33_peak_259	21	.	2.90612	5.26082	2.10672
chr1	136234198	136234425	H33_peak_259	21	.	2.90612	5.26082	2.10672
chr1	136259895	136260969	H33_peak_260	21	.	2.90612	5.26082	2.10672
chr1	136259895	136261045	H33_peak_260	21	.	2.90612	5.26082	2.10672
chr1	136345418	136346237	H33_peak_261	23	.	3.64724	5.36835	2.3272
chr1	136345418	136346237	H33_peak_261	23	.	3.64724	5.36835	2.3272
chr1	136415135	136415477	H33_peak_262	28	.	3.93439	6.03195	2.89314
chr1	136415243	136415477	H33_peak_262	28	.	3.93439	6.03195	2.89314
chr1	136466203	136466739	H33_peak_263	79	.	6.05869	11.6734	7.90195
chr1	136466203	136466739	H33_peak_263	79	.	6.05869	11.6734	7.90195
chr1	138619296	138619573	H33_peak_264	19	.	3.35175	4.91866	1.98875
chr1	138856576	138856881	H33_peak_266	83	.	6.0055	12.2239	8.35663
chr1	138856641	138856881	H33_peak_266	83	.	6.0055	12.2239	8.35663
chr1	139422427	139422785	H33_peak_267	48	.	4.28658	8.36545	4.88617
chr1	139454702	139455248	H33_peak_268	131	.	8.00335	17.3971	13.1379
chr1	139454702	139455248	H33_peak_268	131	.	8.00335	17.3971	13.1379
chr1	140924177	140924452	H33_peak_269	22	.	2.98009	5.23276	2.24834
chr1	140924029	140924452	H33_peak_269	22	.	2.98009	5.23276	2.24834
chr1	141558785	141558998	H33_peak_270	32	.	3.74765	6.45027	3.26233
chr1	143776709	143777621	H33_peak_271	55	.	5.03804	9.02248	5.54844
chr1	143776770	143777621	H33_peak_271	55	.	5.03804	9.02248	5.54844
chr1	143862388	143862650	H33_peak_272	17	.	2.85429	4.67076	1.76639
chr1	143862388	143862650	H33_peak_272	17	.	2.85429	4.67076	1.76639
chr1	150392977	150393533	H33_peak_275	46	.	4.19366	8.12582	4.66235
chr1	150392977	150393533	H33_peak_275	46	.	4.19366	8.12582	4.66235
chr1	151344373	151344690	H33_peak_276	42	.	4.55069	7.56382	4.21744
chr1	151344373	151344690	H33_peak_276	42	.	4.55069	7.56382	4.21744
chr1	151427999	151429074	H33_peak_277	45	.	4.1396	7.97292	4.51824
chr1	151428022	151429074	H33_peak_277	45	.	4.1396	7.97292	4.51824
chr1	151500575	151501191	H33_peak_278	47	.	4.37521	8.20449	4.79324
chr1	151500575	151501182	H33_peak_278	47	.	4.37521	8.20449	4.79324
chr1	151755315	151755778	H33_peak_279	78	.	6.75005	11.5428	7.8468
chr1	151755315	151755778	H33_peak_279	78	.	6.75005	11.5428	7.8468
chr1	152386402	152386710	H33_peak_280	30	.	3.4481	6.36429	3.09242
chr1	152386402	152386625	H33_peak_280	30	.	3.4481	6.36429	3.09242
chr1	152765943	152767083	H33_peak_281	91	.	6.5545	12.9602	9.16215
chr1	152766082	152767083	H33_peak_281	91	.	6.5545	12.9602	9.16215
chr1	152902171	152903402	H33_peak_282	32	.	3.49165	6.53735	3.23835
chr1	152902171	152903402	H33_peak_282	32	.	3.49165	6.53735	3.23835
chr1	153425022	153425522	H33_peak_283	42	.	4.0143	7.71381	4.29193
chr1	153425096	153425522	H33_peak_283	42	.	4.0143	7.71381	4.29193
chr1	153487001	153487810	H33_peak_284	44	.	4.0676	7.87421	4.44426
chr1	153487001	153487808	H33_peak_284	44	.	4.0676	7.87421	4.44426
chr1	155098411	155099117	H33_peak_285	26	.	3.20318	5.90282	2.67407
chr1	155098393	155099117	H33_peak_285	26	.	3.20318	5.90282	2.67407
chr1	155158629	155159124	H33_peak_286	38	.	3.84983	7.01285	3.81505
chr1	155158663	155159124	H33_peak_286	38	.	3.84983	7.01285	3.81505
chr1	155244275	155244804	H33_peak_287	27	.	3.24168	5.98601	2.74758
chr1	155244111	155244748	H33_peak_287	27	.	3.24168	5.98601	2.74758
chr1	155416793	155417563	H33_peak_288	74	.	6.44361	11.1109	7.46735
chr1	155416808	155417521	H33_peak_288	74	.	6.44361	11.1109	7.46735
chr1	155558075	155558483	H33_peak_289	46	.	4.22144	8.15241	4.6777
chr1	155558109	155558483	H33_peak_289	46	.	4.22144	8.15241	4.6777
chr1	155812847	155813196	H33_peak_290	29	.	4.26264	6.0933	2.96535
chr1	155812847	155813243	H33_peak_290	29	.	4.26264	6.0933	2.96535
chr1	155972855	155973260	H33_peak_291	21	.	2.90612	5.26082	2.10672
chr1	155972855	155973260	H33_peak_291	21	.	2.90612	5.26082	2.10672
chr1	156303444	156303671	H33_peak_292	29	.	3.41137	6.1715	2.96885
chr1	156473914	156474355	H33_peak_293	45	.	4.11864	7.94832	4.50151
chr1	156473914	156474268	H33_peak_293	45	.	4.11864	7.94832	4.50151
chr1	156558662	156559041	H33_peak_294	29	.	4.00817	6.13678	2.97793
chr1	156558662	156559041	H33_peak_294	29	.	4.00817	6.13678	2.97793
chr1	156718346	156718812	H33_peak_295	60	.	5.40199	9.53199	6.03056
chr1	156718379	156718812	H33_peak_295	60	.	5.40199	9.53199	6.03056
chr1	157411726	157412508	H33_peak_296	38	.	3.95638	7.19019	3.87548
chr1	157411936	157412508	H33_peak_296	38	.	3.95638	7.19019	3.87548
chr1	160212429	160213037	H33_peak_297	26	.	3.53265	5.672	2.61657
chr1	160212393	160213037	H33_peak_297	26	.	3.53265	5.672	2.61657
chr1	160792654	160793137	H33_peak_298	25	.	3.1314	5.74768	2.53696
chr1	160792654	160793131	H33_peak_298	25	.	3.1314	5.74768	2.53696
chr1	160906104	160907084	H33_peak_299	48	.	4.81129	8.18363	4.84398
chr1	160906104	160907101	H33_peak_299	48	.	4.81129	8.18363	4.84398
chr1	161034397	161035054	H33_peak_300	69	.	6.0145	10.5752	6.93745
chr1	161034397	161035054	H33_peak_300	69	.	6.0145	10.5752	6.93745
chr1	161876459	161876971	H33_peak_301	41	.	3.97699	7.59417	4.17481
chr1	161876459	161876954	H33_peak_301	41	.	3.97699	7.59417	4.17481
chr1	161969198	161969553	H33_peak_302	70	.	5.29096	10.7213	7.01123
chr1	161969198	161969502	H33_peak_302	70	.	5.29096	10.7213	7.01123
chr1	162477510	162478051	H33_peak_303	39	.	3.96717	7.32965	3.97456
chr1	162477495	162478051	H33_peak_303	39	.	3.96717	7.32965	3.97456
chr1	162570450	162571071	H33_peak_304	41	.	3.94346	7.56634	4.16358
chr1	162570450	162571071	H33_peak_304	41	.	3.94346	7.56634	4.16358
chr1	162820078	162820319	H33_peak_305	29	.	3.37238	6.26967	2.99864
chr1	162820138	162820319	H33_peak_305	29	.	3.37238	6.26967	2.99864
chr1	163779568	163779872	H33_peak_306	40	.	3.91007	7.43087	4.073
chr1	163779568	163779872	H33_peak_306	40	.	3.91007	7.43087	4.073
chr1	163929757	163930224	H33_peak_307	51	.	4.42213	8.66654	5.15464
chr1	163929757	163930224	H33_peak_307	51	.	4.42213	8.66654	5.15464
chr1	163994469	163994680	H33_peak_308	33	.	4.31124	6.54018	3.31845
chr1	163994520	163994680	H33_peak_308	33	.	4.31124	6.54018	3.31845
chr1	164248655	164249593	H33_peak_309	61	.	5.06872	9.69356	6.13079
chr1	164248627	164249593	H33_peak_309	61	.	5.06872	9.69356	6.13079
chr1	164457896	164458371	H33_peak_310	21	.	2.90612	5.26082	2.10672
chr1	164458270	164458371	H33_peak_310	21	.	2.90612	5.26082	2.10672
chr1	165236624	165237132	H33_peak_311	55	.	4.61799	9.08949	5.52669
chr1	165236624	165237103	H33_peak_311	55	.	4.61799	9.08949	5.52669
chr1	165459826	165461559	H33_peak_312	63	.	5.43112	9.96339	6.36391
chr1	165459826	165461559	H33_peak_312	63	.	5.43112	9.96339	6.36391
chr1	165527031	165527486	H33_peak_313	26	.	3.73095	5.76501	2.61986
chr1	165527022	165527486	H33_peak_313	26	.	3.73095	5.76501	2.61986
chr1	165634235	165634804	H33_peak_314	39	.	4.08946	7.2717	3.97737
chr1	165634235	165634804	H33_peak_314	39	.	4.08946	7.2717	3.97737
chr1	166003252	166003606	H33_peak_315	25	.	3.83604	5.60981	2.52855
chr1	166003252	166003374	H33_peak_315	25	.	3.83604	5.60981	2.52855
chr1	166238358	166238720	H33_peak_316	45	.	4.16918	8.04972	4.59023
chr1	166238358	166238720	H33_peak_316	45	.	4.16918	8.04972	4.59023
chr1	166378926	166379881	H33_peak_317	35	.	4.26253	6.74988	3.51379
chr1	166379140	166379881	H33_peak_317	35	.	4.26253	6.74988	3.51379
chr1	166409733	166409939	H33_peak_318	21	.	2.90612	5.26082	2.10672
chr1	166409733	166409939	H33_peak_318	21	.	2.90612	5.26082	2.10672
chr1	166912561	166912844	H33_peak_319	33	.	3.7343	6.5191	3.35474
chr1	167269500	167269758	H33_peak_320	21	.	2.90612	5.26082	2.10672
chr1	167283753	167285210	H33_peak_321	51	.	4.43495	8.65458	5.19029
chr1	167283853	167285210	H33_peak_321	51	.	4.43495	8.65458	5.19029
chr1	167350179	167350480	H33_peak_322	55	.	4.60988	9.07801	5.52013
chr1	167350179	167350344	H33_peak_322	55	.	4.60988	9.07801	5.52013
chr1	170174601	170175151	H33_peak_323	19	.	3.20284	4.84445	1.92219
chr1	170174601	170175151	H33_peak_323	19	.	3.20284	4.84445	1.92219
chr1	170885050	170885381	H33_peak_324	27	.	3.22621	5.95258	2.71804
chr1	170885112	170885441	H33_peak_324	27	.	3.22621	5.95258	2.71804
chr1	171150373	171150677	H33_peak_328	36	.	4.24651	6.93577	3.66404
chr1	171150373	171150725	H33_peak_328	36	.	4.24651	6.93577	3.66404
chr1	171246852	171247109	H33_peak_329	73	.	6.4592	11.0198	7.30097
chr1	171246883	171247109	H33_peak_329	73	.	6.4592	11.0198	7.30097
chr1	171287570	171288052	H33_peak_330	63	.	5.09312	9.99068	6.36083
chr1	171287570	171288052	H33_peak_330	63	.	5.09312	9.99068	6.36083
chr1	171411382	171411741	H33_peak_331	31	.	4.01977	6.39319	3.19776
chr1	171411382	171411741	H33_peak_331	31	.	4.01977	6.39319	3.19776
chr1	171503451	171503999	H33_peak_332	55	.	4.58758	9.06425	5.51305
chr1	171503611	171503862	H33_peak_332	55	.	4.58758	9.06425	5.51305
chr1	172147921	172148379	H33_peak_333	40	.	3.92558	7.48401	4.07775
chr1	172147935	172148379	H33_peak_333	40	.	3.92558	7.48401	4.07775
chr1	172376536	172376763	H33_peak_334	39	.	4.02501	7.22088	3.91282
chr1	172376536	172376763	H33_peak_334	39	.	4.02501	7.22088	3.91282
chr1	172632562	172633049	H33_peak_335	40	.	3.92853	7.49141	4.08463
chr1	172632587	172633049	H33_peak_335	40	.	3.92853	7.49141	4.08463
chr1	175492094	175492539	H33_peak_339	21	.	2.90612	5.26082	2.10672
chr1	175625308	175625648	H33_peak_340	27	.	3.26649	6.03962	2.79496
chr1	175692346	175692848	H33_peak_341	61	.	4.90335	9.7711	6.14519
chr1	175692346	175692848	H33_peak_341	61	.	4.90335	9.7711	6.14519
chr1	175880722	175880955	H33_peak_342	28	.	3.99835	5.96722	2.8582
chr1	175880722	175880955	H33_peak_342	28	.	3.99835	5.96722	2.8582
chr1	176813548	176814380	H33_peak_343	24	.	3.50837	5.53011	2.48414
chr1	176813548	176814380	H33_peak_343	24	.	3.50837	5.53011	2.48414
chr1	177257600	177258842	H33_peak_344	34	.	3.58291	6.73079	3.40809
chr1	177257600	177258842	H33_peak_344	34	.	3.58291	6.73079	3.40809
chr1	177441580	177442003	H33_peak_345	36	.	3.71222	7.03399	3.68362
chr1	177441580	177442003	H33_peak_345	36	.	3.71222	7.03399	3.68362
chr1	177796169	177796725	H33_peak_346	27	.	4.21948	5.80007	2.70232
chr1	177796169	177796692	H33_peak_346	27	.	4.21948	5.80007	2.70232
chr1	177983260	177984122	H33_peak_347	59	.	4.91071	9.55011	5.97606
chr1	177983260	177984181	H33_peak_347	59	.	4.91071	9.55011	5.97606
chr1	178187468	178188449	H33_peak_348	57	.	5.11055	9.24362	5.73618
chr1	178187468	178188449	H33_peak_348	57	.	5.11055	9.24362	5.73618
chr1	178318679	178319291	H33_peak_349	76	.	6.17939	11.3579	7.64145
chr1	178318679	178319221	H33_peak_349	76	.	6.17939	11.3579	7.64145
chr1	178336268	178338104	H33_peak_350	60	.	4.82512	9.49411	6.02365
chr1	178336460	178338104	H33_peak_350	60	.	4.82512	9.49411	6.02365
chr1	178406113	178406530	H33_peak_351	62	.	6.16377	9.7825	6.21273
chr1	178406113	178406530	H33_peak_351	62	.	6.16377	9.7825	6.21273
chr1	178528135	178528400	H33_peak_352	17	.	2.85561	4.68583	1.77509
chr1	178530664	178530917	H33_peak_353	21	.	2.90612	5.26082	2.10672
chr1	179546004	179546844	H33_peak_354	31	.	3.8698	6.38147	3.17859
chr1	179546004	179546902	H33_peak_354	31	.	3.8698	6.38147	3.17859
chr1	179668412	179668618	H33_peak_355	23	.	3.81356	5.40516	2.39115
chr1	179668412	179668618	H33_peak_355	23	.	3.81356	5.40516	2.39115
chr1	179802914	179803681	H33_peak_356	49	.	4.50421	8.39664	4.95373
chr1	179802914	179803681	H33_peak_356	49	.	4.50421	8.39664	4.95373
chr1	180195884	180196181	H33_peak_357	45	.	4.91999	7.91208	4.56249
chr1	180195884	180196094	H33_peak_357	45	.	4.91999	7.91208	4.56249
chr1	180365303	180365570	H33_peak_358	21	.	2.90612	5.26082	2.10672
chr1	180568862	180569343	H33_peak_359	68	.	6.5534	10.4295	6.80381
chr1	180568862	180569305	H33_peak_359	68	.	6.5534	10.4295	6.80381
chr1	180640789	180641736	H33_peak_360	44	.	4.263	7.84768	4.42844
chr1	180640847	180641736	H33_peak_360	44	.	4.263	7.84768	4.42844
chr1	180696893	180697164	H33_peak_361	29	.	3.36198	6.24599	2.97732
chr1	180726084	180726640	H33_peak_362	21	.	3.58696	5.16641	2.18597
chr1	180726084	180726289	H33_peak_362	21	.	3.58696	5.16641	2.18597
chr1	180813149	180814400	H33_peak_363	46	.	4.15371	8.05585	4.60282
chr1	180813149	180814400	H33_peak_363	46	.	4.15371	8.05585	4.60282
chr1	180850553	180851272	H33_peak_364	117	.	8.12287	15.7516	11.7632
chr1	180850553	180851272	H33_peak_364	117	.	8.12287	15.7516	11.7632
chr1	181143892	181144276	H33_peak_365	98	.	6.60249	13.8318	9.83718
chr1	181143892	181144348	H33_peak_365	98	.	6.60249	13.8318	9.83718
chr1	181211113	181212343	H33_peak_366	47	.	4.31883	8.07843	4.71168
chr1	181211113	181212343	H33_peak_366	47	.	4.31883	8.07843	4.71168
chr1	181841831	181842337	H33_peak_367	40	.	4.44564	7.30643	4.02063
chr1	181841863	181842337	H33_peak_367	40	.	4.44564	7.30643	4.02063
chr1	182124681	182125116	H33_peak_368	29	.	4.06953	6.12893	2.9673
chr1	182124613	182125116	H33_peak_368	29	.	4.06953	6.12893	2.9673
chr1	182282185	182282827	H33_peak_369	40	.	3.91717	7.4857	4.0856
chr1	182282185	182282827	H33_peak_369	40	.	3.91717	7.4857	4.0856
chr1	182341100	182341190	H33_peak_370	21	.	2.90612	5.26082	2.10672
chr1	182408602	182409695	H33_peak_371	96	.	7.11983	13.642	9.69947
chr1	182408602	182409655	H33_peak_371	96	.	7.11983	13.642	9.69947
chr1	183297012	183297803	H33_peak_372	93	.	6.41476	13.3553	9.39706
chr1	183297012	183297739	H33_peak_372	93	.	6.41476	13.3553	9.39706
chr1	183345189	183345547	H33_peak_373	150	.	8.74811	19.3965	15.0197
chr1	183345189	183345547	H33_peak_373	150	.	8.74811	19.3965	15.0197
chr1	183369217	183369593	H33_peak_374	28	.	3.38637	6.01294	2.83391
chr1	183369217	183369593	H33_peak_374	28	.	3.38637	6.01294	2.83391
chr1	184033460	184033665	H33_peak_375	21	.	2.90612	5.26082	2.10672
chr1	184033460	184033665	H33_peak_375	21	.	2.90612	5.26082	2.10672
chr1	184882759	184882992	H33_peak_377	21	.	2.90612	5.26082	2.10672
chr1	185204012	185204399	H33_peak_379	44	.	5.11258	7.77901	4.43064
chr1	185204012	185204399	H33_peak_379	44	.	5.11258	7.77901	4.43064
chr1	185328915	185329416	H33_peak_381	88	.	6.1738	12.7591	8.84291
chr1	185328915	185329416	H33_peak_381	88	.	6.1738	12.7591	8.84291
chr1	185363119	185363445	H33_peak_382	40	.	3.8917	7.46465	4.07634
chr1	185363119	185363445	H33_peak_382	40	.	3.8917	7.46465	4.07634
chr1	186967563	186967870	H33_peak_383	25	.	3.12138	5.72604	2.51784
chr1	186967563	186967870	H33_peak_383	25	.	3.12138	5.72604	2.51784
chr1	187215531	187215830	H33_peak_384	41	.	4.47532	7.45904	4.17778
chr1	187215546	187215806	H33_peak_384	41	.	4.47532	7.45904	4.17778
chr1	187393638	187393840	H33_peak_385	36	.	4.29722	6.91085	3.6215
chr1	187609012	187609300	H33_peak_386	21	.	2.90612	5.26082	2.10672
chr1	189007330	189007819	H33_peak_387	69	.	5.37044	10.6326	6.98755
chr1	189007330	189007819	H33_peak_387	69	.	5.37044	10.6326	6.98755
chr1	189717883	189718152	H33_peak_388	24	.	3.1644	5.61045	2.49258
chr1	190169128	190169413	H33_peak_389	31	.	3.51675	6.46276	3.19237
chr1	190170946	190170993	H33_peak_390	35	.	3.63739	6.84119	3.50331
chr1	190509187	190509475	H33_peak_391	35	.	3.66182	6.89399	3.54997
chr1	190509198	190509475	H33_peak_391	35	.	3.66182	6.89399	3.54997
chr1	190978545	190978966	H33_peak_392	24	.	3.12839	5.54259	2.41491
chr1	190978545	190978966	H33_peak_392	24	.	3.12839	5.54259	2.41491
chr1	191062886	191063373	H33_peak_393	26	.	3.57065	5.70751	2.64297
chr1	191062886	191063437	H33_peak_393	26	.	3.57065	5.70751	2.64297
chr1	191224407	191224756	H33_peak_394	32	.	3.48007	6.50715	3.21002
chr1	191224522	191224756	H33_peak_394	32	.	3.48007	6.50715	3.21002
chr1	191326158	191326365	H33_peak_395	22	.	3.37077	5.21612	2.226
chr1	191326158	191326365	H33_peak_395	22	.	3.37077	5.21612	2.226
chr1	191396168	191397255	H33_peak_396	52	.	4.5123	8.80073	5.25693
chr1	191396168	191397255	H33_peak_396	52	.	4.5123	8.80073	5.25693
chr1	191575127	191575948	H33_peak_397	106	.	7.22491	14.5491	10.6474
chr1	191575127	191575948	H33_peak_397	106	.	7.22491	14.5491	10.6474
chr1	191718638	191719159	H33_peak_398	32	.	3.53827	6.46478	3.24265
chr1	191718638	191719103	H33_peak_398	32	.	3.53827	6.46478	3.24265
chr1	191821484	191821969	H33_peak_399	37	.	3.74699	7.08921	3.72605
chr1	191821484	191821969	H33_peak_399	37	.	3.74699	7.08921	3.72605
chr1	191906244	191907325	H33_peak_400	56	.	4.59038	9.15398	5.61652
chr1	191906534	191907325	H33_peak_400	56	.	4.59038	9.15398	5.61652
chr1	192092339	192092754	H33_peak_401	69	.	5.28346	10.657	6.94712
chr1	192092330	192092756	H33_peak_401	69	.	5.28346	10.657	6.94712
chr1	192136760	192137021	H33_peak_402	30	.	3.40717	6.34625	3.06675
chr1	192138282	192138564	H33_peak_403	21	.	3.5919	5.09405	2.13786
chr1	192138282	192138564	H33_peak_403	21	.	3.5919	5.09405	2.13786
chr1	192854928	192855292	H33_peak_404	36	.	3.87413	6.99873	3.69274
chr1	192854913	192855156	H33_peak_404	36	.	3.87413	6.99873	3.69274
chr1	193035532	193035759	H33_peak_405	31	.	3.95234	6.28691	3.15342
chr1	193035532	193035759	H33_peak_405	31	.	3.95234	6.28691	3.15342
chr1	194620404	194620717	H33_peak_406	21	.	3.34113	5.09836	2.13603
chr1	194976313	194976585	H33_peak_407	29	.	3.44449	6.1448	2.9673
chr1	194976318	194976581	H33_peak_407	29	.	3.44449	6.1448	2.9673
chr10	4346733	4346968	H33_peak_408	32	.	3.93279	6.42711	3.21707
chr10	4346733	4346968	H33_peak_408	32	.	3.93279	6.42711	3.21707
chr10	4386523	4388379	H33_peak_409	53	.	4.47103	8.87887	5.36919
chr10	4386519	4388370	H33_peak_409	53	.	4.47103	8.87887	5.36919
chr10	5805227	5806225	H33_peak_411	64	.	5.04785	10.0923	6.43096
chr10	5805221	5806287	H33_peak_411	64	.	5.04785	10.0923	6.43096
chr10	5921961	5922203	H33_peak_412	21	.	2.90612	5.26082	2.10672
chr10	5921961	5922203	H33_peak_412	21	.	2.90612	5.26082	2.10672
chr10	7589555	7590245	H33_peak_413	75	.	5.75664	11.1956	7.50865
chr10	7589571	7590245	H33_peak_413	75	.	5.75664	11.1956	7.50865
chr10	7662873	7663640	H33_peak_414	113	.	7.19014	15.4511	11.3679
chr10	7662873	7663640	H33_peak_414	113	.	7.19014	15.4511	11.3679
chr10	7667490	7667761	H33_peak_415	21	.	2.90612	5.26082	2.10672
chr10	7667490	7667761	H33_peak_415	21	.	2.90612	5.26082	2.10672
chr10	7680877	7681230	H33_peak_416	80	.	5.79435	11.8745	8.05389
chr10	7680877	7681230	H33_peak_416	80	.	5.79435	11.8745	8.05389
chr10	7725810	7726213	H33_peak_417	41	.	4.72468	7.42032	4.10057
chr10	7725810	7726213	H33_peak_417	41	.	4.72468	7.42032	4.10057
chr10	7780567	7780940	H33_peak_418	51	.	5.35339	8.59949	5.13903
chr10	7780627	7780940	H33_peak_418	51	.	5.35339	8.59949	5.13903
chr10	7792698	7793078	H33_peak_419	37	.	3.865	6.98096	3.70348
chr10	7792698	7793078	H33_peak_419	37	.	3.865	6.98096	3.70348
chr10	7955546	7956872	H33_peak_421	31	.	3.59942	6.32043	3.10858
chr10	7955546	7956889	H33_peak_421	31	.	3.59942	6.32043	3.10858
chr10	9900617	9900824	H33_peak_422	21	.	2.90612	5.26082	2.10672
chr10	9900617	9900824	H33_peak_422	21	.	2.90612	5.26082	2.10672
chr10	11280626	11281753	H33_peak_423	31	.	4.23212	6.3353	3.14682
chr10	11280635	11281211	H33_peak_423	31	.	4.23212	6.3353	3.14682
chr10	13008453	13008704	H33_peak_424	95	.	6.50868	13.4163	9.50083
chr10	13008353	13008771	H33_peak_424	95	.	6.50868	13.4163	9.50083
chr10	13192830	13193310	H33_peak_425	124	.	7.66488	16.6585	12.4858
chr10	13192830	13193310	H33_peak_425	124	.	7.66488	16.6585	12.4858
chr10	14545197	14545617	H33_peak_426	45	.	4.10699	7.94125	4.5008
chr10	14545213	14545566	H33_peak_426	45	.	4.10699	7.94125	4.5008
chr10	14705222	14705531	H33_peak_427	36	.	3.72121	7.04829	3.69462
chr10	14705243	14705531	H33_peak_427	36	.	3.72121	7.04829	3.69462
chr10	15197767	15197837	H33_peak_428	21	.	2.90612	5.26082	2.10672
chr10	15197584	15197837	H33_peak_428	21	.	2.90612	5.26082	2.10672
chr10	17723008	17723449	H33_peak_430	35	.	3.67284	6.91021	3.56948
chr10	17723008	17723449	H33_peak_430	35	.	3.67284	6.91021	3.56948
chr10	17947140	17948311	H33_peak_431	29	.	3.32369	6.16832	2.91031
chr10	18318862	18319147	H33_peak_432	37	.	3.75942	7.0749	3.72841
chr10	18318862	18318899	H33_peak_432	37	.	3.75942	7.0749	3.72841
chr10	19015172	19015559	H33_peak_433	34	.	3.75563	6.70838	3.49539
chr10	19015172	19015561	H33_peak_433	34	.	3.75563	6.70838	3.49539
chr10	20148968	20149526	H33_peak_434	34	.	3.60082	6.79618	3.47439
chr10	20148968	20149526	H33_peak_434	34	.	3.60082	6.79618	3.47439
chr10	20312081	20312511	H33_peak_435	26	.	3.68594	5.72904	2.6527
chr10	20312081	20312511	H33_peak_435	26	.	3.68594	5.72904	2.6527
chr10	20952196	20952891	H33_peak_436	79	.	5.8792	11.7578	7.95904
chr10	20952349	20952891	H33_peak_436	79	.	5.8792	11.7578	7.95904
chr10	21993039	21993326	H33_peak_437	39	.	3.8378	7.3057	3.92383
chr10	22730878	22731969	H33_peak_438	52	.	4.47248	8.68211	5.2072
chr10	22730878	22731969	H33_peak_438	52	.	4.47248	8.68211	5.2072
chr10	23786962	23787304	H33_peak_440	58	.	5.72994	9.38282	5.86923
chr10	23786922	23787273	H33_peak_440	58	.	5.72994	9.38282	5.86923
chr10	24149483	24149687	H33_peak_441	28	.	3.2698	6.04679	2.8013
chr10	24595861	24596130	H33_peak_442	21	.	2.90612	5.26082	2.10672
chr10	24870008	24870255	H33_peak_443	55	.	5.27239	9.01964	5.51769
chr10	24870008	24870255	H33_peak_443	55	.	5.27239	9.01964	5.51769
chr10	26078194	26078523	H33_peak_444	19	.	2.8844	5.01362	1.96414
chr10	26376129	26376203	H33_peak_445	17	.	2.85686	4.70002	1.78327
chr10	29243201	29243405	H33_peak_446	21	.	2.92986	5.31213	2.15207
chr10	29313151	29313509	H33_peak_447	63	.	5.43139	9.91564	6.3778
chr10	29313151	29313509	H33_peak_447	63	.	5.43139	9.91564	6.3778
chr10	29361519	29362212	H33_peak_448	36	.	3.71737	7.04786	3.69674
chr10	29361547	29361851	H33_peak_448	36	.	3.71737	7.04786	3.69674
chr10	30200100	30200652	H33_peak_449	64	.	5.19227	10.0503	6.42855
chr10	30200100	30200652	H33_peak_449	64	.	5.19227	10.0503	6.42855
chr10	30600252	30600721	H33_peak_450	43	.	4.07087	7.80445	4.363
chr10	30600315	30600721	H33_peak_450	43	.	4.07087	7.80445	4.363
chr10	30618155	30618501	H33_peak_451	45	.	4.12196	7.92065	4.50052
chr10	30618155	30618479	H33_peak_451	45	.	4.12196	7.92065	4.50052
chr10	30802781	30803069	H33_peak_452	24	.	3.81019	5.56319	2.48252
chr10	30842825	30843118	H33_peak_453	24	.	3.81378	5.57062	2.45473
chr10	30842825	30842895	H33_peak_453	24	.	3.81378	5.57062	2.45473
chr10	32890123	32890331	H33_peak_454	21	.	2.90612	5.26082	2.10672
chr10	32890123	32890331	H33_peak_454	21	.	2.90612	5.26082	2.10672
chr10	33950875	33951281	H33_peak_456	125	.	7.72339	16.7269	12.5249
chr10	33950893	33951259	H33_peak_456	125	.	7.72339	16.7269	12.5249
chr10	34019174	34019735	H33_peak_457	27	.	3.5251	5.895	2.76822
chr10	34019174	34019735	H33_peak_457	27	.	3.5251	5.895	2.76822
chr10	34127503	34127706	H33_peak_458	21	.	2.90612	5.26082	2.10672
chr10	34282206	34282647	H33_peak_459	47	.	4.90113	8.21054	4.79992
chr10	34282205	34282740	H33_peak_459	47	.	4.90113	8.21054	4.79992
chr10	34418225	34418518	H33_peak_460	33	.	4.2162	6.52005	3.31435
chr10	34418225	34418518	H33_peak_460	33	.	4.2162	6.52005	3.31435
chr10	34892045	34892119	H33_peak_461	21	.	2.89649	5.13049	2.10672
chr10	34892045	34892108	H33_peak_461	21	.	2.89649	5.13049	2.10672
chr10	36974215	36974961	H33_peak_462	170	.	10.3273	21.2802	17.0508
chr10	36974222	36974961	H33_peak_462	170	.	10.3273	21.2802	17.0508
chr10	39369566	39369996	H33_peak_464	21	.	2.90612	5.26082	2.10672
chr10	39369566	39369996	H33_peak_464	21	.	2.90612	5.26082	2.10672
chr10	39731269	39732135	H33_peak_465	50	.	4.40504	8.59887	5.08636
chr10	39731269	39732135	H33_peak_465	50	.	4.40504	8.59887	5.08636
chr10	40024878	40025297	H33_peak_466	100	.	6.71389	14.0736	10.0467
chr10	40024888	40025297	H33_peak_466	100	.	6.71389	14.0736	10.0467
chr10	40141958	40142474	H33_peak_467	18	.	3.01927	4.75298	1.84013
chr10	40141958	40142474	H33_peak_467	18	.	3.01927	4.75298	1.84013
chr10	40300923	40301835	H33_peak_468	23	.	3.30861	5.3832	2.32033
chr10	40300923	40301835	H33_peak_468	23	.	3.30861	5.3832	2.32033
chr10	40883571	40884406	H33_peak_469	24	.	3.42765	5.61431	2.46764
chr10	40883571	40883799	H33_peak_469	24	.	3.42765	5.61431	2.46764
chr10	41302845	41303193	H33_peak_470	30	.	4.10824	6.31175	3.09796
chr10	41302887	41303193	H33_peak_470	30	.	4.10824	6.31175	3.09796
chr10	41450304	41450630	H33_peak_471	84	.	6.76223	12.2745	8.45757
chr10	41450304	41450630	H33_peak_471	84	.	6.76223	12.2745	8.45757
chr10	41490481	41490749	H33_peak_472	25	.	4.28334	5.65265	2.5602
chr10	41490481	41490693	H33_peak_472	25	.	4.28334	5.65265	2.5602
chr10	41519099	41519807	H33_peak_473	48	.	4.90624	8.19529	4.80599
chr10	41519164	41519730	H33_peak_473	48	.	4.90624	8.19529	4.80599
chr10	41809658	41810560	H33_peak_474	52	.	4.45798	8.72518	5.20041
chr10	41809673	41810560	H33_peak_474	52	.	4.45798	8.72518	5.20041
chr10	41887315	41887727	H33_peak_475	42	.	4.00573	7.67259	4.24933
chr10	41887315	41887648	H33_peak_475	42	.	4.00573	7.67259	4.24933
chr10	42018005	42018456	H33_peak_476	33	.	3.6229	6.60074	3.37497
chr10	42018005	42018456	H33_peak_476	33	.	3.6229	6.60074	3.37497
chr10	42277724	42278444	H33_peak_477	27	.	3.25604	6.01706	2.77502
chr10	42277724	42278444	H33_peak_477	27	.	3.25604	6.01706	2.77502
chr10	42501956	42502566	H33_peak_478	39	.	3.86948	7.36408	3.9722
chr10	42501956	42502566	H33_peak_478	39	.	3.86948	7.36408	3.9722
chr10	42678801	42679077	H33_peak_479	40	.	3.86707	7.39044	4.005
chr10	42678837	42679176	H33_peak_479	40	.	3.86707	7.39044	4.005
chr10	42761298	42762187	H33_peak_480	24	.	3.18412	5.56281	2.44112
chr10	42761666	42762196	H33_peak_480	24	.	3.18412	5.56281	2.44112
chr10	43220904	43221378	H33_peak_481	64	.	5.54509	9.98618	6.42647
chr10	43220902	43221378	H33_peak_481	64	.	5.54509	9.98618	6.42647
chr10	43540768	43541096	H33_peak_482	22	.	2.98526	5.43186	2.25787
chr10	43540811	43541032	H33_peak_482	22	.	2.98526	5.43186	2.25787
chr10	44268503	44268764	H33_peak_483	50	.	4.40557	8.56056	5.04166
chr10	44268503	44268764	H33_peak_483	50	.	4.40557	8.56056	5.04166
chr10	45485914	45486255	H33_peak_484	26	.	3.22022	5.90789	2.69057
chr10	45485920	45486255	H33_peak_484	26	.	3.22022	5.90789	2.69057
chr10	50592574	50593026	H33_peak_487	52	.	4.50276	8.79944	5.26071
chr10	50592574	50593026	H33_peak_487	52	.	4.50276	8.79944	5.26071
chr10	52381711	52382299	H33_peak_488	53	.	4.86949	8.79198	5.33932
chr10	52381711	52382260	H33_peak_488	53	.	4.86949	8.79198	5.33932
chr10	52417462	52418079	H33_peak_489	43	.	5.09886	7.70122	4.38395
chr10	52417462	52418079	H33_peak_489	43	.	5.09886	7.70122	4.38395
chr10	53379259	53379991	H33_peak_490	35	.	3.88438	6.82026	3.56255
chr10	53379259	53379984	H33_peak_490	35	.	3.88438	6.82026	3.56255
chr10	53596819	53597647	H33_peak_491	29	.	3.37464	6.16283	2.95799
chr10	53596819	53597292	H33_peak_491	29	.	3.37464	6.16283	2.95799
chr10	55504080	55504680	H33_peak_492	18	.	2.87192	4.87154	1.8822
chr10	55504080	55504680	H33_peak_492	18	.	2.87192	4.87154	1.8822
chr10	56115229	56115956	H33_peak_493	43	.	4.02013	7.76029	4.3404
chr10	56115229	56115971	H33_peak_493	43	.	4.02013	7.76029	4.3404
chr10	57532163	57532502	H33_peak_495	34	.	3.58907	6.74759	3.42406
chr10	57532163	57532502	H33_peak_495	34	.	3.58907	6.74759	3.42406
chr10	57766900	57767195	H33_peak_496	22	.	3.54227	5.2039	2.21175
chr10	57766900	57767140	H33_peak_496	22	.	3.54227	5.2039	2.21175
chr10	58255415	58255736	H33_peak_497	59	.	5.58142	9.58126	5.97798
chr10	58255415	58255736	H33_peak_497	59	.	5.58142	9.58126	5.97798
chr10	58323162	58323769	H33_peak_498	41	.	4.6681	7.45204	4.12783
chr10	58323162	58323769	H33_peak_498	41	.	4.6681	7.45204	4.12783
chr10	58446857	58447153	H33_peak_499	21	.	2.90612	5.26082	2.10672
chr10	58446857	58447153	H33_peak_499	21	.	2.90612	5.26082	2.10672
chr10	59221616	59222307	H33_peak_500	18	.	3.48723	4.76526	1.85518
chr10	59221616	59222307	H33_peak_500	18	.	3.48723	4.76526	1.85518
chr10	59323076	59323795	H33_peak_501	34	.	3.60805	6.77778	3.44728
chr10	59323076	59323795	H33_peak_501	34	.	3.60805	6.77778	3.44728
chr10	59951346	59952115	H33_peak_503	52	.	5.01415	8.62585	5.21364
chr10	59951346	59952115	H33_peak_503	52	.	5.01415	8.62585	5.21364
chr10	60002712	60003410	H33_peak_504	86	.	6.96081	12.4785	8.65271
chr10	60002641	60003410	H33_peak_504	86	.	6.96081	12.4785	8.65271
chr10	60277609	60278040	H33_peak_505	46	.	4.1905	8.09203	4.62614
chr10	60277448	60278074	H33_peak_505	46	.	4.1905	8.09203	4.62614
chr10	60831302	60831516	H33_peak_506	30	.	3.50815	6.2452	3.04441
chr10	60831302	60831608	H33_peak_506	30	.	3.50815	6.2452	3.04441
chr10	61146444	61147983	H33_peak_507	24	.	3.08775	5.65335	2.4536
chr10	61146444	61147926	H33_peak_507	24	.	3.08775	5.65335	2.4536
chr10	61648413	61648961	H33_peak_508	38	.	4.14073	7.12524	3.81339
chr10	61648405	61648961	H33_peak_508	38	.	4.14073	7.12524	3.81339
chr10	61680154	61680554	H33_peak_509	53	.	4.67634	8.79448	5.30446
chr10	61680003	61680554	H33_peak_509	53	.	4.67634	8.79448	5.30446
chr10	61695535	61696612	H33_peak_510	34	.	4.02387	6.64198	3.43777
chr10	61695535	61696350	H33_peak_510	34	.	4.02387	6.64198	3.43777
chr10	62340186	62340547	H33_peak_512	21	.	2.90612	5.26082	2.10672
chr10	62449407	62449862	H33_peak_513	39	.	4.43444	7.17327	3.9241
chr10	62449407	62449565	H33_peak_513	39	.	4.43444	7.17327	3.9241
chr10	62486659	62486933	H33_peak_514	29	.	4.01361	6.05336	2.91724
chr10	62486659	62486933	H33_peak_514	29	.	4.01361	6.05336	2.91724
chr10	62578277	62578585	H33_peak_515	25	.	3.82402	5.60849	2.53544
chr10	62650892	62651761	H33_peak_516	88	.	6.46542	12.7052	8.88956
chr10	62650892	62651427	H33_peak_516	88	.	6.46542	12.7052	8.88956
chr10	62791778	62792426	H33_peak_517	29	.	3.36212	6.24629	2.97759
chr10	62791778	62792285	H33_peak_517	29	.	3.36212	6.24629	2.97759
chr10	62920575	62920988	H33_peak_518	32	.	4.509	6.47472	3.27882
chr10	62980378	62980631	H33_peak_519	32	.	3.51773	6.58259	3.27478
chr10	62980378	62980633	H33_peak_519	32	.	3.51773	6.58259	3.27478
chr10	63023508	63024296	H33_peak_520	67	.	5.80078	10.3379	6.71914
chr10	63023508	63024232	H33_peak_520	67	.	5.80078	10.3379	6.71914
chr10	63243644	63244497	H33_peak_521	37	.	3.73173	7.06127	3.70297
chr10	63243644	63244464	H33_peak_521	37	.	3.73173	7.06127	3.70297
chr10	63338972	63339410	H33_peak_522	21	.	2.90612	5.26082	2.10672
chr10	63338570	63339410	H33_peak_522	21	.	2.90612	5.26082	2.10672
chr10	63429834	63430065	H33_peak_523	20	.	3.55389	5.03111	2.08747
chr10	63429834	63430097	H33_peak_523	20	.	3.55389	5.03111	2.08747
chr10	64785205	64785333	H33_peak_524	20	.	2.88229	4.95818	2.04404
chr10	64785122	64785333	H33_peak_524	20	.	2.88229	4.95818	2.04404
chr10	66582867	66582889	H33_peak_525	17	.	2.85065	4.63775	1.75131
chr10	66582867	66582954	H33_peak_525	17	.	2.85065	4.63775	1.75131
chr10	67126621	67126980	H33_peak_526	20	.	2.9339	4.98465	2.05357
chr10	67126603	67126980	H33_peak_526	20	.	2.9339	4.98465	2.05357
chr10	67284915	67285219	H33_peak_527	43	.	4.91374	7.73958	4.35966
chr10	69212415	69212632	H33_peak_529	21	.	2.90612	5.26082	2.10672
chr10	69212549	69212632	H33_peak_529	21	.	2.90612	5.26082	2.10672
chr10	69352259	69352528	H33_peak_530	56	.	4.69228	9.26409	5.68703
chr10	69352259	69352528	H33_peak_530	56	.	4.69228	9.26409	5.68703
chr10	70096743	70097712	H33_peak_531	30	.	3.66736	6.21428	3.02757
chr10	70096743	70097623	H33_peak_531	30	.	3.66736	6.21428	3.02757
chr10	70599083	70599574	H33_peak_532	25	.	3.81712	5.57769	2.52078
chr10	70599083	70599574	H33_peak_532	25	.	3.81712	5.57769	2.52078
chr10	71237780	71238313	H33_peak_533	34	.	4.12769	6.65651	3.47769
chr10	71237780	71238206	H33_peak_533	34	.	4.12769	6.65651	3.47769
chr10	71284881	71285164	H33_peak_534	22	.	3.02637	5.33523	2.22209
chr10	71344564	71344970	H33_peak_535	29	.	3.35229	6.23101	2.96599
chr10	71344564	71344970	H33_peak_535	29	.	3.35229	6.23101	2.96599
chr10	71347735	71348288	H33_peak_536	53	.	4.848	8.8306	5.35743
chr10	71347735	71348503	H33_peak_536	53	.	4.848	8.8306	5.35743
chr10	73764963	73765353	H33_peak_537	15	.	2.82702	4.43811	1.57001
chr10	73765200	73765353	H33_peak_537	15	.	2.82702	4.43811	1.57001
chr10	75211978	75212174	H33_peak_538	20	.	3.54848	5.00582	2.07798
chr10	75211952	75212174	H33_peak_538	20	.	3.54848	5.00582	2.07798
chr10	75517014	75517468	H33_peak_539	101	.	8.15911	14.0295	10.1093
chr10	75517014	75517468	H33_peak_539	101	.	8.15911	14.0295	10.1093
chr10	75667839	75668196	H33_peak_540	23	.	3.01879	5.4203	2.3324
chr10	75667839	75668147	H33_peak_540	23	.	3.01879	5.4203	2.3324
chr10	75764105	75764351	H33_peak_541	25	.	3.84438	5.56881	2.5383
chr10	75764105	75764351	H33_peak_541	25	.	3.84438	5.56881	2.5383
chr10	75859918	75860408	H33_peak_542	22	.	3.13821	5.36826	2.27724
chr10	75859602	75860332	H33_peak_542	22	.	3.13821	5.36826	2.27724
chr10	75893306	75893644	H33_peak_543	91	.	6.23926	13.0418	9.13986
chr10	75893306	75893644	H33_peak_543	91	.	6.23926	13.0418	9.13986
chr10	75921211	75921646	H33_peak_544	48	.	4.27566	8.30002	4.81653
chr10	75921211	75921646	H33_peak_544	48	.	4.27566	8.30002	4.81653
chr10	76032322	76032833	H33_peak_546	61	.	4.89471	9.78993	6.17104
chr10	76032431	76032752	H33_peak_546	61	.	4.89471	9.78993	6.17104
chr10	76344813	76345654	H33_peak_547	29	.	3.37116	6.26583	2.99486
chr10	76344813	76345654	H33_peak_547	29	.	3.37116	6.26583	2.99486
chr10	76442507	76442726	H33_peak_549	23	.	3.71271	5.31782	2.31615
chr10	76442507	76442726	H33_peak_549	23	.	3.71271	5.31782	2.31615
chr10	76468705	76469137	H33_peak_551	23	.	3.38132	5.40554	2.368
chr10	76468705	76469137	H33_peak_551	23	.	3.38132	5.40554	2.368
chr10	76961873	76962306	H33_peak_553	28	.	3.3319	5.98182	2.86858
chr10	76961873	76962306	H33_peak_553	28	.	3.3319	5.98182	2.86858
chr10	77259237	77259639	H33_peak_554	69	.	5.27712	10.6851	6.97732
chr10	77259237	77259695	H33_peak_554	69	.	5.27712	10.6851	6.97732
chr10	77581647	77582135	H33_peak_555	31	.	4.04819	6.2805	3.11373
chr10	77581647	77582135	H33_peak_555	31	.	4.04819	6.2805	3.11373
chr10	77606012	77606904	H33_peak_556	41	.	4.25595	7.49889	4.18464
chr10	77605939	77606904	H33_peak_556	41	.	4.25595	7.49889	4.18464
chr10	77622357	77622663	H33_peak_557	45	.	4.92883	7.88629	4.51707
chr10	77622357	77622663	H33_peak_557	45	.	4.92883	7.88629	4.51707
chr10	77902330	77902535	H33_peak_558	34	.	3.98311	6.69476	3.47239
chr10	77902330	77902535	H33_peak_558	34	.	3.98311	6.69476	3.47239
chr10	78169403	78169811	H33_peak_560	44	.	4.09468	7.88549	4.44271
chr10	78169550	78169811	H33_peak_560	44	.	4.09468	7.88549	4.44271
chr10	78244150	78244783	H33_peak_561	40	.	3.88879	7.33758	4.01484
chr10	78244109	78244540	H33_peak_561	40	.	3.88879	7.33758	4.01484
chr10	78412700	78412903	H33_peak_562	42	.	4.87912	7.59996	4.24222
chr10	78412639	78412903	H33_peak_562	42	.	4.87912	7.59996	4.24222
chr10	78464481	78465179	H33_peak_563	18	.	2.86847	4.83222	1.85952
chr10	78752689	78753061	H33_peak_565	45	.	4.16908	8.04505	4.58468
chr10	78752689	78753061	H33_peak_565	45	.	4.16908	8.04505	4.58468
chr10	79097209	79097667	H33_peak_567	104	.	6.78728	14.4261	10.4188
chr10	79097209	79097594	H33_peak_567	104	.	6.78728	14.4261	10.4188
chr10	79554527	79555256	H33_peak_568	24	.	3.06091	5.59535	2.40235
chr10	79554548	79555144	H33_peak_568	24	.	3.06091	5.59535	2.40235
chr10	79612900	79613933	H33_peak_569	26	.	3.1951	5.88535	2.65862
chr10	79612900	79613943	H33_peak_569	26	.	3.1951	5.88535	2.65862
chr10	79637339	79637544	H33_peak_570	21	.	2.89649	5.13049	2.10672
chr10	79637339	79637544	H33_peak_570	21	.	2.89649	5.13049	2.10672
chr10	79669363	79669808	H33_peak_571	38	.	4.68863	7.16951	3.87364
chr10	79669363	79669750	H33_peak_571	38	.	4.68863	7.16951	3.87364
chr10	79681657	79682191	H33_peak_572	47	.	4.24489	8.20855	4.72905
chr10	79681657	79682191	H33_peak_572	47	.	4.24489	8.20855	4.72905
chr10	79717206	79717413	H33_peak_573	21	.	2.97739	5.30545	2.18761
chr10	79717219	79717413	H33_peak_573	21	.	2.97739	5.30545	2.18761
chr10	79735788	79735852	H33_peak_574	28	.	3.66472	5.93846	2.83315
chr10	79746330	79746727	H33_peak_575	50	.	4.36851	8.51716	5.01346
chr10	79746439	79746727	H33_peak_575	50	.	4.36851	8.51716	5.01346
chr10	79761436	79762263	H33_peak_576	21	.	2.90612	5.26082	2.10672
chr10	79761436	79762263	H33_peak_576	21	.	2.90612	5.26082	2.10672
chr10	79766704	79767099	H33_peak_577	42	.	4.18074	7.68988	4.2851
chr10	79766652	79767099	H33_peak_577	42	.	4.18074	7.68988	4.2851
chr10	79803839	79804086	H33_peak_578	21	.	2.90612	5.26082	2.10672
chr10	79803839	79804086	H33_peak_578	21	.	2.90612	5.26082	2.10672
chr10	79854397	79854894	H33_peak_579	32	.	4.00751	6.42659	3.22787
chr10	79854523	79854894	H33_peak_579	32	.	4.00751	6.42659	3.22787
chr10	79860537	79860769	H33_peak_580	32	.	3.64636	6.38599	3.21016
chr10	79860418	79860632	H33_peak_580	32	.	3.64636	6.38599	3.21016
chr10	79865832	79866117	H33_peak_581	20	.	2.87954	4.92994	2.01676
chr10	79897461	79897685	H33_peak_583	21	.	2.90612	5.26082	2.10672
chr10	79908667	79908899	H33_peak_584	38	.	4.61763	7.10897	3.8388
chr10	79908667	79908899	H33_peak_584	38	.	4.61763	7.10897	3.8388
chr10	79921074	79921273	H33_peak_585	19	.	2.88448	5.01054	1.97457
chr10	79921074	79921357	H33_peak_585	19	.	2.88448	5.01054	1.97457
chr10	79926866	79927557	H33_peak_586	29	.	3.33078	6.17858	2.91775
chr10	79926866	79927557	H33_peak_586	29	.	3.33078	6.17858	2.91775
chr10	79960124	79960524	H33_peak_587	35	.	4.4523	6.76098	3.5087
chr10	79960124	79960527	H33_peak_587	35	.	4.4523	6.76098	3.5087
chr10	80039596	80039864	H33_peak_588	28	.	4.0647	5.93423	2.83734
chr10	80039596	80039782	H33_peak_588	28	.	4.0647	5.93423	2.83734
chr10	80047320	80047563	H33_peak_589	19	.	2.8685	4.80939	1.9003
chr10	80053436	80054337	H33_peak_590	66	.	5.80934	10.2279	6.61383
chr10	80053436	80054361	H33_peak_590	66	.	5.80934	10.2279	6.61383
chr10	80057984	80058262	H33_peak_591	21	.	2.90612	5.26082	2.10672
chr10	80057984	80058277	H33_peak_591	21	.	2.90612	5.26082	2.10672
chr10	80131583	80133001	H33_peak_594	24	.	3.27837	5.52741	2.41333
chr10	80131583	80132321	H33_peak_594	24	.	3.27837	5.52741	2.41333
chr10	80141429	80142736	H33_peak_595	36	.	3.71222	7.02896	3.67757
chr10	80141429	80142707	H33_peak_595	36	.	3.71222	7.02896	3.67757
chr10	80148638	80150428	H33_peak_596	28	.	3.28696	6.03562	2.83681
chr10	80148638	80150428	H33_peak_596	28	.	3.28696	6.03562	2.83681
chr10	80159730	80160212	H33_peak_597	29	.	4.11865	6.03329	2.91273
chr10	80159730	80160228	H33_peak_597	29	.	4.11865	6.03329	2.91273
chr10	80167603	80168349	H33_peak_598	30	.	4.25016	6.2324	3.06304
chr10	80167603	80168349	H33_peak_598	30	.	4.25016	6.2324	3.06304
chr10	80226304	80226618	H33_peak_599	28	.	3.54541	5.95181	2.8658
chr10	80226254	80226618	H33_peak_599	28	.	3.54541	5.95181	2.8658
chr10	80260756	80261220	H33_peak_600	33	.	3.57292	6.67242	3.36634
chr10	80260756	80261220	H33_peak_600	33	.	3.57292	6.67242	3.36634
chr10	80279139	80279438	H33_peak_601	27	.	3.25278	6.00999	2.76877
chr10	80279139	80279438	H33_peak_601	27	.	3.25278	6.00999	2.76877
chr10	80283064	80283269	H33_peak_602	31	.	3.4591	6.45588	3.16281
chr10	80292349	80292704	H33_peak_603	26	.	3.19809	5.89181	2.66434
chr10	80292454	80292704	H33_peak_603	26	.	3.19809	5.89181	2.66434
chr10	80323526	80323878	H33_peak_604	42	.	4.11725	7.59725	4.29893
chr10	80323526	80323878	H33_peak_604	42	.	4.11725	7.59725	4.29893
chr10	80329850	80330247	H33_peak_605	48	.	5.1063	8.26031	4.83757
chr10	80329850	80330247	H33_peak_605	48	.	5.1063	8.26031	4.83757
chr10	80356288	80356615	H33_peak_606	21	.	2.90612	5.26082	2.10672
chr10	80356288	80356630	H33_peak_606	21	.	2.90612	5.26082	2.10672
chr10	80398697	80399746	H33_peak_607	67	.	5.33405	10.4041	6.74271
chr10	80398697	80399746	H33_peak_607	67	.	5.33405	10.4041	6.74271
chr10	80494877	80495498	H33_peak_608	30	.	3.38253	6.2904	3.01657
chr10	80538902	80539228	H33_peak_609	49	.	4.33243	8.40724	4.90696
chr10	80538902	80539228	H33_peak_609	49	.	4.33243	8.40724	4.90696
chr10	80561338	80561571	H33_peak_610	51	.	5.28008	8.64734	5.17787
chr10	80561338	80561571	H33_peak_610	51	.	5.28008	8.64734	5.17787
chr10	80577177	80578067	H33_peak_611	26	.	3.19094	5.85517	2.63999
chr10	80577177	80578067	H33_peak_611	26	.	3.19094	5.85517	2.63999
chr10	80586515	80586874	H33_peak_612	40	.	4.00196	7.33742	4.02015
chr10	80586514	80586874	H33_peak_612	40	.	4.00196	7.33742	4.02015
chr10	80602792	80603289	H33_peak_613	83	.	5.93113	12.2212	8.36685
chr10	80602792	80603289	H33_peak_613	83	.	5.93113	12.2212	8.36685
chr10	80622145	80622745	H33_peak_614	40	.	4.28109	7.3366	4.08626
chr10	80622145	80622591	H33_peak_614	40	.	4.28109	7.3366	4.08626
chr10	80675821	80676784	H33_peak_615	34	.	4.03976	6.62036	3.41307
chr10	80675928	80676784	H33_peak_615	34	.	4.03976	6.62036	3.41307
chr10	80701790	80702915	H33_peak_616	28	.	3.28537	6.08306	2.83419
chr10	80701790	80702866	H33_peak_616	28	.	3.28537	6.08306	2.83419
chr10	80741910	80742460	H33_peak_617	98	.	6.45565	13.7479	9.83118
chr10	80741910	80742460	H33_peak_617	98	.	6.45565	13.7479	9.83118
chr10	80755087	80755501	H33_peak_618	35	.	3.67713	6.93692	3.59106
chr10	80755087	80755501	H33_peak_618	35	.	3.67713	6.93692	3.59106
chr10	80792185	80792753	H33_peak_619	31	.	3.62403	6.31815	3.14143
chr10	80792185	80792753	H33_peak_619	31	.	3.62403	6.31815	3.14143
chr10	80797978	80798712	H33_peak_620	44	.	4.31674	7.81729	4.49444
chr10	80797978	80798712	H33_peak_620	44	.	4.31674	7.81729	4.49444
chr10	80807022	80807441	H33_peak_621	38	.	3.87711	7.21878	3.87624
chr10	80807022	80807441	H33_peak_621	38	.	3.87711	7.21878	3.87624
chr10	80826558	80827121	H33_peak_622	40	.	3.89356	7.40975	4.0115
chr10	80826558	80827121	H33_peak_622	40	.	3.89356	7.40975	4.0115
chr10	80834827	80835536	H33_peak_623	23	.	3.05699	5.47717	2.33948
chr10	80834827	80835536	H33_peak_623	23	.	3.05699	5.47717	2.33948
chr10	80855168	80855610	H33_peak_624	30	.	3.8276	6.19106	3.04809
chr10	80855316	80855610	H33_peak_624	30	.	3.8276	6.19106	3.04809
chr10	80900428	80900848	H33_peak_625	52	.	5.8025	8.74533	5.29085
chr10	80900428	80900848	H33_peak_625	52	.	5.8025	8.74533	5.29085
chr10	81037054	81037332	H33_peak_626	68	.	6.00652	10.5243	6.85611
chr10	81037054	81037332	H33_peak_626	68	.	6.00652	10.5243	6.85611
chr10	81069995	81070318	H33_peak_627	34	.	3.67835	6.61562	3.44343
chr10	81069995	81070368	H33_peak_627	34	.	3.67835	6.61562	3.44343
chr10	81105796	81106315	H33_peak_628	42	.	5.10671	7.55613	4.22859
chr10	81105796	81106315	H33_peak_628	42	.	5.10671	7.55613	4.22859
chr10	81136533	81137775	H33_peak_629	30	.	4.12283	6.24926	3.08185
chr10	81136350	81137775	H33_peak_629	30	.	4.12283	6.24926	3.08185
chr10	81154260	81154407	H33_peak_630	24	.	4.00035	5.50205	2.45867
chr10	81154260	81154489	H33_peak_630	24	.	4.00035	5.50205	2.45867
chr10	81233246	81233492	H33_peak_633	35	.	3.6414	6.84985	3.51096
chr10	81266593	81266929	H33_peak_635	33	.	4.69662	6.54089	3.34621
chr10	81266593	81266929	H33_peak_635	33	.	4.69662	6.54089	3.34621
chr10	81277245	81277449	H33_peak_637	21	.	2.90612	5.26082	2.10672
chr10	81293074	81293400	H33_peak_638	44	.	4.27751	7.75652	4.40485
chr10	81293074	81293173	H33_peak_638	44	.	4.27751	7.75652	4.40485
chr10	81316968	81317197	H33_peak_639	21	.	2.90612	5.26082	2.10672
chr10	81316968	81317197	H33_peak_639	21	.	2.90612	5.26082	2.10672
chr10	81357420	81357700	H33_peak_640	25	.	3.34254	5.62655	2.5675
chr10	81378223	81378939	H33_peak_641	93	.	6.89574	13.2374	9.35485
chr10	81378223	81378939	H33_peak_641	93	.	6.89574	13.2374	9.35485
chr10	81429952	81431103	H33_peak_642	24	.	3.08716	5.65208	2.45248
chr10	81544445	81545577	H33_peak_643	35	.	3.63831	6.86614	3.53269
chr10	81544445	81545473	H33_peak_643	35	.	3.63831	6.86614	3.53269
chr10	82048084	82048423	H33_peak_652	49	.	5.23074	8.42362	4.98649
chr10	82048194	82048423	H33_peak_652	49	.	5.23074	8.42362	4.98649
chr10	82083225	82083675	H33_peak_653	87	.	6.07486	12.5809	8.7004
chr10	82083225	82083629	H33_peak_653	87	.	6.07486	12.5809	8.7004
chr10	82127912	82128403	H33_peak_654	114	.	7.26333	15.5502	11.4359
chr10	82127912	82128408	H33_peak_654	114	.	7.26333	15.5502	11.4359
chr10	82622852	82623074	H33_peak_656	45	.	4.14536	7.99383	4.53943
chr10	82622852	82623074	H33_peak_656	45	.	4.14536	7.99383	4.53943
chr10	82629794	82630016	H33_peak_657	32	.	4.13202	6.5195	3.2929
chr10	82629757	82630016	H33_peak_657	32	.	4.13202	6.5195	3.2929
chr10	82699136	82699651	H33_peak_658	31	.	3.42733	6.38791	3.10296
chr10	82699136	82699593	H33_peak_658	31	.	3.42733	6.38791	3.10296
chr10	83337597	83337805	H33_peak_659	21	.	2.90612	5.26082	2.10672
chr10	83337597	83337805	H33_peak_659	21	.	2.90612	5.26082	2.10672
chr10	83360051	83360674	H33_peak_660	53	.	5.00615	8.82991	5.32274
chr10	83360051	83360674	H33_peak_660	53	.	5.00615	8.82991	5.32274
chr10	83543638	83543972	H33_peak_661	40	.	3.89932	7.41177	4.03795
chr10	83543708	83543972	H33_peak_661	40	.	3.89932	7.41177	4.03795
chr10	83648509	83648742	H33_peak_662	33	.	3.55192	6.65647	3.34007
chr10	83648388	83648742	H33_peak_662	33	.	3.55192	6.65647	3.34007
chr10	83722821	83723215	H33_peak_663	26	.	3.50491	5.69941	2.63048
chr10	83722821	83723223	H33_peak_663	26	.	3.50491	5.69941	2.63048
chr10	84576856	84577393	H33_peak_664	97	.	6.50494	13.7282	9.77806
chr10	84576856	84577353	H33_peak_664	97	.	6.50494	13.7282	9.77806
chr10	84917486	84917823	H33_peak_665	59	.	5.23907	9.47037	5.91988
chr10	84917486	84917792	H33_peak_665	59	.	5.23907	9.47037	5.91988
chr10	85184632	85185501	H33_peak_666	39	.	3.95056	7.32465	3.98766
chr10	85184632	85185490	H33_peak_666	39	.	3.95056	7.32465	3.98766
chr10	85387587	85387960	H33_peak_667	21	.	2.90612	5.26082	2.10672
chr10	85387587	85387960	H33_peak_667	21	.	2.90612	5.26082	2.10672
chr10	85916620	85917057	H33_peak_669	39	.	3.89416	7.26686	3.95547
chr10	85916620	85917057	H33_peak_669	39	.	3.89416	7.26686	3.95547
chr10	85957422	85957619	H33_peak_670	31	.	4.01863	6.3695	3.18999
chr10	85957393	85957619	H33_peak_670	31	.	4.01863	6.3695	3.18999
chr10	86021761	86022334	H33_peak_671	29	.	3.97421	6.13548	2.98462
chr10	86021761	86022143	H33_peak_671	29	.	3.97421	6.13548	2.98462
chr10	86300165	86300534	H33_peak_672	67	.	5.19268	10.4056	6.70973
chr10	86300272	86300534	H33_peak_672	67	.	5.19268	10.4056	6.70973
chr10	86685549	86685839	H33_peak_673	70	.	6.29075	10.644	7.01853
chr10	86705256	86705823	H33_peak_674	51	.	5.83428	8.64144	5.19726
chr10	86705256	86705823	H33_peak_674	51	.	5.83428	8.64144	5.19726
chr10	88146653	88147237	H33_peak_675	62	.	5.86921	9.81786	6.25337
chr10	88146652	88147228	H33_peak_675	62	.	5.86921	9.81786	6.25337
chr10	88459606	88460053	H33_peak_676	61	.	4.94433	9.66406	6.15741
chr10	88459608	88460034	H33_peak_676	61	.	4.94433	9.66406	6.15741
chr10	88731367	88731741	H33_peak_677	48	.	4.26334	8.29127	4.814
chr10	88731367	88731741	H33_peak_677	48	.	4.26334	8.29127	4.814
chr10	89685929	89686585	H33_peak_678	46	.	4.68573	8.01113	4.62319
chr10	89685929	89686305	H33_peak_678	46	.	4.68573	8.01113	4.62319
chr10	89745004	89745538	H33_peak_679	29	.	3.35551	6.23202	2.96498
chr10	89745004	89745538	H33_peak_679	29	.	3.35551	6.23202	2.96498
chr10	91082389	91083345	H33_peak_680	30	.	3.56695	6.28606	3.07734
chr10	91082387	91083345	H33_peak_680	30	.	3.56695	6.28606	3.07734
chr10	91123538	91124037	H33_peak_681	47	.	4.74826	8.04849	4.70719
chr10	91123538	91124037	H33_peak_681	47	.	4.74826	8.04849	4.70719
chr10	91171090	91171833	H33_peak_682	34	.	3.79797	6.70362	3.47092
chr10	91171213	91171833	H33_peak_682	34	.	3.79797	6.70362	3.47092
chr10	92721902	92722606	H33_peak_683	45	.	4.14589	8.0069	4.55308
chr10	92721958	92722508	H33_peak_683	45	.	4.14589	8.0069	4.55308
chr10	93081227	93081618	H33_peak_684	29	.	3.36445	6.25134	2.98206
chr10	93081397	93081618	H33_peak_684	29	.	3.36445	6.25134	2.98206
chr10	93160591	93161599	H33_peak_685	49	.	4.56894	8.4126	4.96825
chr10	93160591	93161624	H33_peak_685	49	.	4.56894	8.4126	4.96825
chr10	93453331	93453682	H33_peak_686	53	.	4.52759	8.89349	5.35503
chr10	93589388	93589669	H33_peak_687	38	.	4.66877	7.06924	3.81738
chr10	93589374	93589669	H33_peak_687	38	.	4.66877	7.06924	3.81738
chr10	93833705	93834320	H33_peak_688	38	.	3.78333	7.17824	3.80808
chr10	93833705	93834320	H33_peak_688	38	.	3.78333	7.17824	3.80808
chr10	93889349	93889558	H33_peak_689	54	.	4.59787	8.99553	5.43222
chr10	93889349	93889558	H33_peak_689	54	.	4.59787	8.99553	5.43222
chr10	94035396	94036463	H33_peak_690	26	.	3.2284	5.80616	2.64591
chr10	94035396	94036463	H33_peak_690	26	.	3.2284	5.80616	2.64591
chr10	94147871	94148485	H33_peak_691	49	.	4.41189	8.41706	4.94329
chr10	94147871	94148456	H33_peak_691	49	.	4.41189	8.41706	4.94329
chr10	94688695	94689144	H33_peak_693	47	.	4.27611	8.27614	4.78879
chr10	94688695	94689118	H33_peak_693	47	.	4.27611	8.27614	4.78879
chr10	94943718	94944432	H33_peak_694	27	.	3.26301	6.0321	2.78831
chr10	94944060	94944432	H33_peak_694	27	.	3.26301	6.0321	2.78831
chr10	95323731	95324081	H33_peak_695	75	.	5.54376	11.3148	7.54892
chr10	95323731	95324030	H33_peak_695	75	.	5.54376	11.3148	7.54892
chr10	95514752	95515804	H33_peak_696	32	.	4.36411	6.37931	3.2427
chr10	95514752	95515776	H33_peak_696	32	.	4.36411	6.37931	3.2427
chr10	95940571	95940898	H33_peak_697	21	.	2.90612	5.26082	2.10672
chr10	95940571	95940898	H33_peak_697	21	.	2.90612	5.26082	2.10672
chr10	96616448	96617059	H33_peak_698	59	.	5.21686	9.4818	5.91944
chr10	96616482	96617059	H33_peak_698	59	.	5.21686	9.4818	5.91944
chr10	99107089	99107495	H33_peak_700	72	.	5.54932	11.047	7.29624
chr10	99107144	99107424	H33_peak_700	72	.	5.54932	11.047	7.29624
chr10	105841003	105841375	H33_peak_701	46	.	5.05319	7.97045	4.62672
chr10	105841012	105841375	H33_peak_701	46	.	5.05319	7.97045	4.62672
chr10	108162050	108162946	H33_peak_703	40	.	4.98203	7.3228	4.03744
chr10	108162050	108162767	H33_peak_703	40	.	4.98203	7.3228	4.03744
chr10	108332553	108332831	H33_peak_704	44	.	4.11525	7.91529	4.46571
chr10	108332553	108332831	H33_peak_704	44	.	4.11525	7.91529	4.46571
chr10	110745167	110745681	H33_peak_705	28	.	3.28801	6.08613	2.83606
chr10	110745167	110745681	H33_peak_705	28	.	3.28801	6.08613	2.83606
chr10	111009589	111009983	H33_peak_706	47	.	4.41893	8.15384	4.72452
chr10	111009589	111009983	H33_peak_706	47	.	4.41893	8.15384	4.72452
chr10	111164611	111165265	H33_peak_707	78	.	5.68337	11.6646	7.87492
chr10	111164611	111165265	H33_peak_707	78	.	5.68337	11.6646	7.87492
chr10	111298679	111298900	H33_peak_708	82	.	6.42907	12.0463	8.26978
chr10	111298679	111298900	H33_peak_708	82	.	6.42907	12.0463	8.26978
chr10	111473199	111473904	H33_peak_709	24	.	3.42722	5.5647	2.43318
chr10	111473199	111473870	H33_peak_709	24	.	3.42722	5.5647	2.43318
chr10	112425542	112425908	H33_peak_711	17	.	3.46876	4.69281	1.78662
chr10	112928623	112929161	H33_peak_714	53	.	4.49853	8.86828	5.33879
chr10	112928623	112929231	H33_peak_714	53	.	4.49853	8.86828	5.33879
chr10	115251179	115251517	H33_peak_715	49	.	4.3289	8.40359	4.90572
chr10	115362156	115362511	H33_peak_716	108	.	6.96103	14.8576	10.8114
chr10	115362156	115362511	H33_peak_716	108	.	6.96103	14.8576	10.8114
chr10	115384332	115385516	H33_peak_717	49	.	4.66183	8.3529	4.91587
chr10	115384332	115385516	H33_peak_717	49	.	4.66183	8.3529	4.91587
chr10	116113730	116114230	H33_peak_718	37	.	3.74308	7.12254	3.76817
chr10	116113730	116114230	H33_peak_718	37	.	3.74308	7.12254	3.76817
chr10	116581191	116582036	H33_peak_719	75	.	5.70865	11.3319	7.58272
chr10	116581191	116582036	H33_peak_719	75	.	5.70865	11.3319	7.58272
chr10	117063408	117063630	H33_peak_720	30	.	4.33804	6.28782	3.09898
chr10	117063377	117063630	H33_peak_720	30	.	4.33804	6.28782	3.09898
chr10	117148013	117148581	H33_peak_721	18	.	2.86034	4.72822	1.82171
chr10	117148013	117148581	H33_peak_721	18	.	2.86034	4.72822	1.82171
chr10	117224213	117224489	H33_peak_722	53	.	5.96281	8.80805	5.35526
chr10	117224213	117224489	H33_peak_722	53	.	5.96281	8.80805	5.35526
chr10	117376766	117377084	H33_peak_723	40	.	3.87482	7.39907	4.01029
chr10	117376766	117377084	H33_peak_723	40	.	3.87482	7.39907	4.01029
chr10	117710830	117711157	H33_peak_724	33	.	3.67112	6.61582	3.34143
chr10	117710830	117711034	H33_peak_724	33	.	3.67112	6.61582	3.34143
chr10	117792393	117792974	H33_peak_725	71	.	5.52084	10.759	7.14706
chr10	117792393	117793010	H33_peak_725	71	.	5.52084	10.759	7.14706
chr10	117845291	117845579	H33_peak_726	20	.	2.95782	5.04264	2.02603
chr10	117845291	117845579	H33_peak_726	20	.	2.95782	5.04264	2.02603
chr10	118141510	118142126	H33_peak_727	41	.	4.35915	7.50644	4.15838
chr10	118141532	118142126	H33_peak_727	41	.	4.35915	7.50644	4.15838
chr10	118868221	118869044	H33_peak_728	32	.	3.51306	6.57732	3.27166
chr10	118868221	118869122	H33_peak_728	32	.	3.51306	6.57732	3.27166
chr10	119239172	119240334	H33_peak_729	79	.	6.16998	11.5977	7.99744
chr10	119239318	119240334	H33_peak_729	79	.	6.16998	11.5977	7.99744
chr10	120208710	120209020	H33_peak_730	44	.	4.18703	7.75945	4.47352
chr10	120208710	120209034	H33_peak_730	44	.	4.18703	7.75945	4.47352
chr10	120979141	120979562	H33_peak_732	30	.	3.90019	6.24858	3.07938
chr10	120979141	120979729	H33_peak_732	30	.	3.90019	6.24858	3.07938
chr10	121364990	121365324	H33_peak_733	21	.	2.90612	5.26082	2.10672
chr10	121364990	121365324	H33_peak_733	21	.	2.90612	5.26082	2.10672
chr10	121476223	121476456	H33_peak_734	41	.	3.9746	7.59317	4.17526
chr10	121626011	121626635	H33_peak_736	35	.	4.1908	6.72835	3.52063
chr10	121626011	121626638	H33_peak_736	35	.	4.1908	6.72835	3.52063
chr10	122047494	122047571	H33_peak_737	37	.	3.74102	7.10333	3.74716
chr10	122096790	122097265	H33_peak_738	36	.	3.71055	7.01095	3.65705
chr10	122096693	122097265	H33_peak_738	36	.	3.71055	7.01095	3.65705
chr10	122985562	122986296	H33_peak_739	25	.	3.25066	5.68827	2.57127
chr10	122985562	122986285	H33_peak_739	25	.	3.25066	5.68827	2.57127
chr10	123076364	123076696	H33_peak_740	78	.	5.68385	11.683	7.89292
chr10	123076364	123076696	H33_peak_740	78	.	5.68385	11.683	7.89292
chr10	125389212	125389554	H33_peak_742	26	.	3.21554	5.66474	2.63125
chr10	125389212	125389580	H33_peak_742	26	.	3.21554	5.66474	2.63125
chr10	126978179	126979550	H33_peak_743	70	.	5.26035	10.733	7.04793
chr10	126978181	126979550	H33_peak_743	70	.	5.26035	10.733	7.04793
chr10	127041329	127042187	H33_peak_744	45	.	4.70147	7.94142	4.51956
chr10	127041329	127042143	H33_peak_744	45	.	4.70147	7.94142	4.51956
chr10	127063411	127063973	H33_peak_745	49	.	4.31608	8.44424	4.9581
chr10	127063411	127063847	H33_peak_745	49	.	4.31608	8.44424	4.9581
chr10	127165017	127165735	H33_peak_746	32	.	3.96583	6.47102	3.26595
chr10	127165193	127165735	H33_peak_746	32	.	3.96583	6.47102	3.26595
chr10	127188356	127188700	H33_peak_747	22	.	2.95834	5.37368	2.20646
chr10	127188307	127188700	H33_peak_747	22	.	2.95834	5.37368	2.20646
chr10	127195492	127195765	H33_peak_748	35	.	3.64125	6.89658	3.56632
chr10	127195492	127195712	H33_peak_748	35	.	3.64125	6.89658	3.56632
chr10	127211169	127211709	H33_peak_749	74	.	5.48395	11.1628	7.40986
chr10	127211173	127211709	H33_peak_749	74	.	5.48395	11.1628	7.40986
chr10	127266406	127266634	H33_peak_750	41	.	4.48187	7.4863	4.14681
chr10	127266406	127266801	H33_peak_750	41	.	4.48187	7.4863	4.14681
chr10	127283743	127283959	H33_peak_751	29	.	3.36703	6.25691	2.98698
chr10	127283711	127283959	H33_peak_751	29	.	3.36703	6.25691	2.98698
chr10	127285775	127286065	H33_peak_752	21	.	2.90612	5.26082	2.10672
chr10	127285775	127286056	H33_peak_752	21	.	2.90612	5.26082	2.10672
chr10	127288473	127289384	H33_peak_753	116	.	7.09682	15.6122	11.6715
chr10	127288473	127289384	H33_peak_753	116	.	7.09682	15.6122	11.6715
chr10	127290410	127290675	H33_peak_754	82	.	6.45012	12.009	8.21574
chr10	127290410	127290675	H33_peak_754	82	.	6.45012	12.009	8.21574
chr10	127299604	127299868	H33_peak_755	31	.	3.47551	6.49134	3.19414
chr10	127299714	127299868	H33_peak_755	31	.	3.47551	6.49134	3.19414
chr10	127380507	127380829	H33_peak_756	26	.	3.19191	5.87846	2.65254
chr10	127526561	127526944	H33_peak_757	21	.	2.90612	5.26082	2.10672
chr10	127677023	127677459	H33_peak_758	40	.	4.45197	7.29099	4.00906
chr10	127677023	127677459	H33_peak_758	40	.	4.45197	7.29099	4.00906
chr10	127743170	127743367	H33_peak_759	21	.	2.90612	5.26082	2.10672
chr10	128035370	128036117	H33_peak_760	32	.	3.99217	6.47422	3.24251
chr10	128035347	128036068	H33_peak_760	32	.	3.99217	6.47422	3.24251
chr10	128058788	128059842	H33_peak_761	40	.	4.24475	7.42898	4.07278
chr10	128059157	128059743	H33_peak_761	40	.	4.24475	7.42898	4.07278
chr10	128083206	128083567	H33_peak_762	59	.	5.65822	9.48621	5.96749
chr10	128083206	128083689	H33_peak_762	59	.	5.65822	9.48621	5.96749
chr10	128093219	128093601	H33_peak_763	58	.	5.66701	9.43056	5.89744
chr10	128093219	128093601	H33_peak_763	58	.	5.66701	9.43056	5.89744
chr10	128096796	128097404	H33_peak_764	25	.	3.71485	5.66688	2.51593
chr10	128096840	128097404	H33_peak_764	25	.	3.71485	5.66688	2.51593
chr10	128194307	128194637	H33_peak_765	57	.	5.55554	9.32489	5.77382
chr10	128194307	128194637	H33_peak_765	57	.	5.55554	9.32489	5.77382
chr10	128231848	128232398	H33_peak_766	49	.	4.90572	8.37749	4.94472
chr10	128231898	128232398	H33_peak_766	49	.	4.90572	8.37749	4.94472
chr10	128337593	128338413	H33_peak_767	52	.	4.49621	8.80781	5.27461
chr10	128337593	128338413	H33_peak_767	52	.	4.49621	8.80781	5.27461
chr10	128409610	128409847	H33_peak_768	33	.	3.53966	6.62997	3.31666
chr10	128409610	128409847	H33_peak_768	33	.	3.53966	6.62997	3.31666
chr10	128411302	128411926	H33_peak_769	43	.	4.00003	7.72063	4.30886
chr10	128411302	128411926	H33_peak_769	43	.	4.00003	7.72063	4.30886
chr10	128498796	128499039	H33_peak_770	47	.	4.43705	8.15509	4.73582
chr10	128498796	128499039	H33_peak_770	47	.	4.43705	8.15509	4.73582
chr10	128544323	128544694	H33_peak_771	21	.	2.90612	5.26082	2.10672
chr10	128547348	128547763	H33_peak_772	74	.	6.17278	11.1258	7.46098
chr10	128547348	128547763	H33_peak_772	74	.	6.17278	11.1258	7.46098
chr10	128565357	128565763	H33_peak_773	35	.	4.36195	6.74832	3.53751
chr10	128565233	128565763	H33_peak_773	35	.	4.36195	6.74832	3.53751
chr10	128645733	128645942	H33_peak_774	21	.	2.90612	5.26082	2.10672
chr10	128669023	128669316	H33_peak_775	66	.	5.1543	10.3017	6.61515
chr10	128669023	128669303	H33_peak_775	66	.	5.1543	10.3017	6.61515
chr10	128673848	128674184	H33_peak_776	29	.	3.3189	6.02725	2.90366
chr10	128673848	128674184	H33_peak_776	29	.	3.3189	6.02725	2.90366
chr10	128695773	128696330	H33_peak_777	76	.	6.8791	11.3574	7.64789
chr10	128695773	128696330	H33_peak_777	76	.	6.8791	11.3574	7.64789
chr10	128704839	128705231	H33_peak_778	27	.	4.35809	5.83842	2.72395
chr10	128704839	128705091	H33_peak_778	27	.	4.35809	5.83842	2.72395
chr10	128805439	128805762	H33_peak_779	27	.	3.87832	5.81516	2.70856
chr10	128805439	128805806	H33_peak_779	27	.	3.87832	5.81516	2.70856
chr11	3202233	3202600	H33_peak_782	29	.	4.39765	6.08682	2.93286
chr11	3202313	3202600	H33_peak_782	29	.	4.39765	6.08682	2.93286
chr11	3265996	3266750	H33_peak_783	63	.	4.9703	9.94041	6.3038
chr11	3265996	3266770	H33_peak_783	63	.	4.9703	9.94041	6.3038
chr11	3289249	3289564	H33_peak_784	30	.	3.51698	6.32845	3.07977
chr11	3289297	3289564	H33_peak_784	30	.	3.51698	6.32845	3.07977
chr11	3331882	3332504	H33_peak_785	37	.	4.29263	7.00574	3.71331
chr11	3331911	3332504	H33_peak_785	37	.	4.29263	7.00574	3.71331
chr11	3452096	3452361	H33_peak_786	76	.	6.80264	11.385	7.67834
chr11	3452096	3452361	H33_peak_786	76	.	6.80264	11.385	7.67834
chr11	3538957	3539304	H33_peak_787	21	.	2.90612	5.26082	2.10672
chr11	3628936	3629109	H33_peak_788	21	.	2.90612	5.26082	2.10672
chr11	3648502	3649523	H33_peak_789	51	.	4.56624	8.57518	5.1018
chr11	3648503	3649499	H33_peak_789	51	.	4.56624	8.57518	5.1018
chr11	3761995	3762019	H33_peak_790	22	.	2.99548	5.45395	2.27739
chr11	3761897	3762019	H33_peak_790	22	.	2.99548	5.45395	2.27739
chr11	3863645	3864056	H33_peak_791	39	.	3.80883	7.28202	3.91361
chr11	3863645	3864056	H33_peak_791	39	.	3.80883	7.28202	3.91361
chr11	3912861	3913032	H33_peak_792	31	.	4.20556	6.32509	3.17766
chr11	3912790	3913032	H33_peak_792	31	.	4.20556	6.32509	3.17766
chr11	4135058	4135388	H33_peak_793	21	.	2.90612	5.26082	2.10672
chr11	4135074	4135388	H33_peak_793	21	.	2.90612	5.26082	2.10672
chr11	4160157	4160571	H33_peak_794	48	.	4.30068	8.37355	4.88714
chr11	4160157	4160571	H33_peak_794	48	.	4.30068	8.37355	4.88714
chr11	4186650	4187243	H33_peak_795	70	.	5.46348	10.7444	7.03047
chr11	4186684	4187120	H33_peak_795	70	.	5.46348	10.7444	7.03047
chr11	4266994	4267089	H33_peak_796	21	.	2.90612	5.26082	2.10672
chr11	4594369	4594993	H33_peak_797	23	.	3.02178	5.51079	2.32762
chr11	4594369	4594865	H33_peak_797	23	.	3.02178	5.51079	2.32762
chr11	4637648	4638009	H33_peak_798	88	.	7.08929	12.7135	8.88199
chr11	4637648	4638009	H33_peak_798	88	.	7.08929	12.7135	8.88199
chr11	4848873	4849516	H33_peak_799	46	.	4.97421	8.01849	4.64487
chr11	4848873	4849531	H33_peak_799	46	.	4.97421	8.01849	4.64487
chr11	4895325	4895603	H33_peak_800	79	.	5.78087	11.7938	7.96152
chr11	4895325	4895603	H33_peak_800	79	.	5.78087	11.7938	7.96152
chr11	4947747	4948009	H33_peak_801	21	.	2.90612	5.26082	2.10672
chr11	4947747	4948009	H33_peak_801	21	.	2.90612	5.26082	2.10672
chr11	4986929	4987144	H33_peak_802	28	.	3.51808	5.99298	2.87791
chr11	4986929	4987144	H33_peak_802	28	.	3.51808	5.99298	2.87791
chr11	5061542	5062013	H33_peak_803	32	.	3.50257	6.55003	3.24608
chr11	5061542	5062013	H33_peak_803	32	.	3.50257	6.55003	3.24608
chr11	5098801	5099776	H33_peak_804	79	.	5.83874	11.7987	7.98239
chr11	5098801	5099776	H33_peak_804	79	.	5.83874	11.7987	7.98239
chr11	5103986	5104307	H33_peak_805	20	.	2.8953	5.1377	2.03571
chr11	5103980	5104307	H33_peak_805	20	.	2.8953	5.1377	2.03571
chr11	5444721	5445070	H33_peak_806	32	.	3.46957	6.50234	3.21147
chr11	5444722	5445070	H33_peak_806	32	.	3.46957	6.50234	3.21147
chr11	5520968	5521151	H33_peak_807	32	.	4.25764	6.39704	3.20559
chr11	5520968	5521203	H33_peak_807	32	.	4.25764	6.39704	3.20559
chr11	5541946	5542180	H33_peak_808	44	.	4.35853	7.79166	4.42052
chr11	5541946	5542180	H33_peak_808	44	.	4.35853	7.79166	4.42052
chr11	5707411	5707814	H33_peak_809	45	.	4.15221	8.00693	4.54895
chr11	5707411	5707839	H33_peak_809	45	.	4.15221	8.00693	4.54895
chr11	5740869	5741186	H33_peak_810	22	.	3.35786	5.26248	2.27176
chr11	5740869	5741186	H33_peak_810	22	.	3.35786	5.26248	2.27176
chr11	5761974	5762489	H33_peak_811	43	.	4.01304	7.72731	4.32203
chr11	5761974	5762489	H33_peak_811	43	.	4.01304	7.72731	4.32203
chr11	5788371	5788881	H33_peak_812	22	.	3.11669	5.21287	2.22016
chr11	5788371	5788860	H33_peak_812	22	.	3.11669	5.21287	2.22016
chr11	5877984	5878421	H33_peak_813	27	.	3.26602	6.04062	2.79682
chr11	5877984	5878300	H33_peak_813	27	.	3.26602	6.04062	2.79682
chr11	5955616	5956058	H33_peak_814	75	.	5.50562	11.3229	7.58309
chr11	5955616	5955991	H33_peak_814	75	.	5.50562	11.3229	7.58309
chr11	6200063	6200448	H33_peak_815	42	.	4.53761	7.65087	4.29207
chr11	6200063	6200448	H33_peak_815	42	.	4.53761	7.65087	4.29207
chr11	6291462	6292203	H33_peak_816	134	.	9.78771	17.6748	13.4356
chr11	6291462	6292203	H33_peak_816	134	.	9.78771	17.6748	13.4356
chr11	6415655	6416202	H33_peak_817	35	.	3.9514	6.81209	3.56357
chr11	6415472	6416187	H33_peak_817	35	.	3.9514	6.81209	3.56357
chr11	6444099	6444631	H33_peak_818	36	.	4.22709	6.88076	3.62608
chr11	6444173	6444631	H33_peak_818	36	.	4.22709	6.88076	3.62608
chr11	6546515	6547422	H33_peak_819	50	.	4.41609	8.60654	5.08844
chr11	6546515	6547384	H33_peak_819	50	.	4.41609	8.60654	5.08844
chr11	6602604	6602755	H33_peak_821	19	.	2.91372	4.94008	1.97426
chr11	7063800	7064209	H33_peak_822	39	.	3.86264	7.34175	3.95006
chr11	7063732	7064041	H33_peak_822	39	.	3.86264	7.34175	3.95006
chr11	7581697	7581841	H33_peak_823	20	.	3.55552	5.05211	2.09073
chr11	9010863	9011447	H33_peak_824	76	.	5.63416	11.3655	7.62337
chr11	9010899	9011357	H33_peak_824	76	.	5.63416	11.3655	7.62337
chr11	11115782	11115898	H33_peak_825	21	.	2.90612	5.26082	2.10672
chr11	11462232	11462450	H33_peak_827	21	.	2.90612	5.26082	2.10672
chr11	11462232	11462342	H33_peak_827	21	.	2.90612	5.26082	2.10672
chr11	11808676	11809625	H33_peak_828	57	.	4.67251	9.28625	5.71735
chr11	11808676	11809456	H33_peak_828	57	.	4.67251	9.28625	5.71735
chr11	12025636	12026267	H33_peak_829	29	.	3.68542	6.09256	2.92807
chr11	12025636	12026267	H33_peak_829	29	.	3.68542	6.09256	2.92807
chr11	17211244	17211583	H33_peak_830	44	.	4.10057	7.88921	4.44448
chr11	17211244	17211583	H33_peak_830	44	.	4.10057	7.88921	4.44448
chr11	17465665	17465973	H33_peak_831	21	.	2.90612	5.26082	2.10672
chr11	17465721	17465973	H33_peak_831	21	.	2.90612	5.26082	2.10672
chr11	17953464	17953865	H33_peak_832	35	.	4.34638	6.81093	3.5768
chr11	17953464	17953865	H33_peak_832	35	.	4.34638	6.81093	3.5768
chr11	20112861	20113280	H33_peak_834	40	.	3.89345	7.43685	4.04321
chr11	20112861	20113280	H33_peak_834	40	.	3.89345	7.43685	4.04321
chr11	20200994	20201970	H33_peak_835	66	.	6.26089	10.2267	6.60923
chr11	20200994	20201970	H33_peak_835	66	.	6.26089	10.2267	6.60923
chr11	20249268	20249778	H33_peak_836	31	.	3.74467	6.34721	3.1554
chr11	20249268	20249778	H33_peak_836	31	.	3.74467	6.34721	3.1554
chr11	20542832	20543677	H33_peak_837	62	.	5.55587	9.84142	6.26632
chr11	20542832	20543588	H33_peak_837	62	.	5.55587	9.84142	6.26632
chr11	20631897	20632339	H33_peak_838	53	.	4.55913	8.94551	5.39611
chr11	20631897	20632529	H33_peak_838	53	.	4.55913	8.94551	5.39611
chr11	20741393	20741612	H33_peak_839	20	.	3.03675	5.03422	2.07193
chr11	20741393	20741612	H33_peak_839	20	.	3.03675	5.03422	2.07193
chr11	21238564	21238892	H33_peak_841	26	.	3.17031	5.83177	2.61128
chr11	21238529	21238892	H33_peak_841	26	.	3.17031	5.83177	2.61128
chr11	21370450	21371220	H33_peak_842	47	.	4.26962	8.26228	4.77581
chr11	21370492	21371220	H33_peak_842	47	.	4.26962	8.26228	4.77581
chr11	22286667	22287309	H33_peak_843	29	.	4.23857	6.04616	2.92351
chr11	22286704	22287309	H33_peak_843	29	.	4.23857	6.04616	2.92351
chr11	22512232	22512933	H33_peak_844	70	.	5.52397	10.6605	7.00268
chr11	22512296	22512933	H33_peak_844	70	.	5.52397	10.6605	7.00268
chr11	23008378	23008582	H33_peak_845	18	.	2.9426	4.74817	1.84585
chr11	23306118	23307146	H33_peak_847	44	.	4.30888	7.80106	4.43264
chr11	23306118	23307146	H33_peak_847	44	.	4.30888	7.80106	4.43264
chr11	23497599	23498247	H33_peak_848	33	.	3.98618	6.54408	3.33608
chr11	23497607	23498247	H33_peak_848	33	.	3.98618	6.54408	3.33608
chr11	23633656	23633898	H33_peak_849	39	.	3.8468	7.32251	3.93784
chr11	23633656	23633898	H33_peak_849	39	.	3.8468	7.32251	3.93784
chr11	23665547	23666098	H33_peak_850	46	.	4.20821	8.15142	4.68457
chr11	23665416	23666098	H33_peak_850	46	.	4.20821	8.15142	4.68457
chr11	23770675	23771527	H33_peak_851	40	.	3.9245	7.4866	4.08163
chr11	23770675	23771527	H33_peak_851	40	.	3.9245	7.4866	4.08163
chr11	23894644	23895398	H33_peak_852	41	.	4.69917	7.43614	4.12061
chr11	23894644	23895398	H33_peak_852	41	.	4.69917	7.43614	4.12061
chr11	24080415	24080691	H33_peak_853	31	.	3.42518	6.32452	3.1077
chr11	26387175	26387541	H33_peak_854	44	.	4.09715	7.86224	4.41439
chr11	26387191	26387541	H33_peak_854	44	.	4.09715	7.86224	4.41439
chr11	26593176	26593853	H33_peak_855	35	.	4.24896	6.78462	3.55646
chr11	26593307	26593853	H33_peak_855	35	.	4.24896	6.78462	3.55646
chr11	29130708	29130978	H33_peak_856	70	.	6.03931	10.6594	7.029
chr11	29130687	29130978	H33_peak_856	70	.	6.03931	10.6594	7.029
chr11	29172933	29173336	H33_peak_857	30	.	3.38927	6.30496	3.02944
chr11	29172933	29173336	H33_peak_857	30	.	3.38927	6.30496	3.02944
chr11	29373676	29374047	H33_peak_858	19	.	2.8825	4.99198	1.95166
chr11	29526387	29526615	H33_peak_859	21	.	2.90612	5.26082	2.10672
chr11	29526374	29526615	H33_peak_859	21	.	2.90612	5.26082	2.10672
chr11	29692865	29693911	H33_peak_860	71	.	6.15258	10.7621	7.10766
chr11	29692865	29693868	H33_peak_860	71	.	6.15258	10.7621	7.10766
chr11	30073855	30074073	H33_peak_861	21	.	2.90612	5.26082	2.10672
chr11	30755205	30755414	H33_peak_862	21	.	2.90612	5.26082	2.10672
chr11	30771986	30772398	H33_peak_863	32	.	3.50333	6.56014	3.25772
chr11	30771986	30772398	H33_peak_863	32	.	3.50333	6.56014	3.25772
chr11	30954382	30954623	H33_peak_864	28	.	4.082	6.02754	2.88355
chr11	30954382	30954623	H33_peak_864	28	.	4.082	6.02754	2.88355
chr11	31870478	31871218	H33_peak_865	77	.	5.65383	11.5632	7.77041
chr11	31870478	31871218	H33_peak_865	77	.	5.65383	11.5632	7.77041
chr11	31965752	31966072	H33_peak_866	36	.	4.59651	6.95	3.69502
chr11	31965752	31966017	H33_peak_866	36	.	4.59651	6.95	3.69502
chr11	32226411	32226690	H33_peak_867	36	.	4.04324	6.89935	3.65595
chr11	32226540	32226746	H33_peak_867	36	.	4.04324	6.89935	3.65595
chr11	32267360	32267747	H33_peak_868	61	.	4.93614	9.7752	6.13527
chr11	32267378	32267747	H33_peak_868	61	.	4.93614	9.7752	6.13527
chr11	32455695	32455951	H33_peak_869	36	.	3.70366	6.9844	3.62987
chr11	32455695	32455877	H33_peak_869	36	.	3.70366	6.9844	3.62987
chr11	32642529	32642935	H33_peak_870	98	.	6.62346	13.8475	9.83747
chr11	32642529	32642935	H33_peak_870	98	.	6.62346	13.8475	9.83747
chr11	33162557	33163337	H33_peak_871	46	.	4.51281	8.02027	4.62082
chr11	33162769	33163337	H33_peak_871	46	.	4.51281	8.02027	4.62082
chr11	33513091	33513747	H33_peak_872	111	.	7.39942	15.1358	11.1245
chr11	33513091	33513726	H33_peak_872	111	.	7.39942	15.1358	11.1245
chr11	35834357	35834568	H33_peak_873	24	.	3.23486	5.42883	2.40366
chr11	35834357	35834552	H33_peak_873	24	.	3.23486	5.42883	2.40366
chr11	40692261	40692771	H33_peak_874	49	.	4.84615	8.38116	4.94202
chr11	40692261	40692778	H33_peak_874	49	.	4.84615	8.38116	4.94202
chr11	41884115	41884536	H33_peak_876	20	.	3.74255	5.05732	2.0793
chr11	41884505	41884536	H33_peak_876	20	.	3.74255	5.05732	2.0793
chr11	43747836	43748057	H33_peak_878	21	.	2.90612	5.26082	2.10672
chr11	43747737	43748057	H33_peak_878	21	.	2.90612	5.26082	2.10672
chr11	44470099	44470484	H33_peak_879	41	.	4.1664	7.45998	4.10912
chr11	44470099	44470484	H33_peak_879	41	.	4.1664	7.45998	4.10912
chr11	45851968	45852669	H33_peak_881	21	.	2.95046	5.24147	2.18703
chr11	45851857	45852569	H33_peak_881	21	.	2.95046	5.24147	2.18703
chr11	45944433	45945065	H33_peak_882	24	.	3.09281	5.44212	2.44109
chr11	45955135	45955550	H33_peak_883	21	.	2.90612	5.26082	2.10672
chr11	45955158	45955550	H33_peak_883	21	.	2.90612	5.26082	2.10672
chr11	45980028	45980320	H33_peak_884	35	.	3.63596	6.8381	3.50058
chr11	45980028	45980320	H33_peak_884	35	.	3.63596	6.8381	3.50058
chr11	46055977	46056387	H33_peak_885	25	.	3.15922	5.80781	2.5901
chr11	46055977	46056246	H33_peak_885	25	.	3.15922	5.80781	2.5901
chr11	48816671	48817417	H33_peak_886	107	.	8.30436	14.701	10.7786
chr11	48816671	48817417	H33_peak_886	107	.	8.30436	14.701	10.7786
chr11	49243725	49244467	H33_peak_887	49	.	4.35787	8.46057	4.95298
chr11	49243909	49244467	H33_peak_887	49	.	4.35787	8.46057	4.95298
chr11	49712295	49712936	H33_peak_888	55	.	4.60713	9.07566	5.51604
chr11	49712295	49712936	H33_peak_888	55	.	4.60713	9.07566	5.51604
chr11	49846478	49846794	H33_peak_889	22	.	2.98793	5.43763	2.26298
chr11	49846478	49846794	H33_peak_889	22	.	2.98793	5.43763	2.26298
chr11	50024953	50025230	H33_peak_890	47	.	4.23502	8.19451	4.71898
chr11	50024953	50025230	H33_peak_890	47	.	4.23502	8.19451	4.71898
chr11	50210376	50210769	H33_peak_891	34	.	3.85407	6.6919	3.4464
chr11	50210376	50210769	H33_peak_891	34	.	3.85407	6.6919	3.4464
chr11	50291952	50292386	H33_peak_892	49	.	4.35024	8.44699	4.94293
chr11	50291952	50292386	H33_peak_892	49	.	4.35024	8.44699	4.94293
chr11	50325217	50325953	H33_peak_893	65	.	6.14146	10.1436	6.56364
chr11	50325217	50325944	H33_peak_893	65	.	6.14146	10.1436	6.56364
chr11	50377876	50378515	H33_peak_894	26	.	3.94615	5.70243	2.63553
chr11	50377876	50378515	H33_peak_894	26	.	3.94615	5.70243	2.63553
chr11	50827378	50827745	H33_peak_895	50	.	4.42351	8.61384	5.09238
chr11	51059294	51059564	H33_peak_896	30	.	3.40123	6.33082	3.05229
chr11	51059294	51059502	H33_peak_896	30	.	3.40123	6.33082	3.05229
chr11	51262923	51263486	H33_peak_897	27	.	4.03412	5.82104	2.70723
chr11	51262923	51263486	H33_peak_897	27	.	4.03412	5.82104	2.70723
chr11	51584596	51585038	H33_peak_898	30	.	3.42444	6.38097	3.09661
chr11	51584582	51585037	H33_peak_898	30	.	3.42444	6.38097	3.09661
chr11	51606138	51606545	H33_peak_899	27	.	3.41102	5.87674	2.77099
chr11	51606138	51606379	H33_peak_899	27	.	3.41102	5.87674	2.77099
chr11	51619785	51620119	H33_peak_900	36	.	4.48258	6.85065	3.63084
chr11	51619785	51619971	H33_peak_900	36	.	4.48258	6.85065	3.63084
chr11	51635529	51635982	H33_peak_901	97	.	6.56878	13.7502	9.76326
chr11	51635506	51635982	H33_peak_901	97	.	6.56878	13.7502	9.76326
chr11	51650363	51651081	H33_peak_902	47	.	4.24104	8.22707	4.75221
chr11	51756010	51756677	H33_peak_903	33	.	3.95209	6.53256	3.3653
chr11	51756010	51756677	H33_peak_903	33	.	3.95209	6.53256	3.3653
chr11	51967542	51968097	H33_peak_904	58	.	4.76673	9.45603	5.85851
chr11	51967542	51967979	H33_peak_904	58	.	4.76673	9.45603	5.85851
chr11	52000318	52000877	H33_peak_905	45	.	4.22173	7.82984	4.53384
chr11	52000318	52000877	H33_peak_905	45	.	4.22173	7.82984	4.53384
chr11	52004148	52004491	H33_peak_906	37	.	4.37601	7.05259	3.79306
chr11	52004168	52004491	H33_peak_906	37	.	4.37601	7.05259	3.79306
chr11	52098611	52099234	H33_peak_907	46	.	5.18412	8.03849	4.64538
chr11	52098611	52099234	H33_peak_907	46	.	5.18412	8.03849	4.64538
chr11	52232204	52232428	H33_peak_908	43	.	4.37782	7.67614	4.31841
chr11	52232204	52232428	H33_peak_908	43	.	4.37782	7.67614	4.31841
chr11	52396467	52396704	H33_peak_909	34	.	4.09395	6.72606	3.4824
chr11	52396415	52396704	H33_peak_909	34	.	4.09395	6.72606	3.4824
chr11	53299927	53300176	H33_peak_910	64	.	5.08084	10.1462	6.47891
chr11	53299927	53300176	H33_peak_910	64	.	5.08084	10.1462	6.47891
chr11	53350485	53351432	H33_peak_911	30	.	3.39106	6.32233	3.0491
chr11	53350775	53351333	H33_peak_911	30	.	3.39106	6.32233	3.0491
chr11	53430457	53430675	H33_peak_912	21	.	2.90612	5.26082	2.10672
chr11	53430457	53430675	H33_peak_912	21	.	2.90612	5.26082	2.10672
chr11	53567300	53567823	H33_peak_913	99	.	6.61888	13.9566	9.97649
chr11	53567308	53567823	H33_peak_913	99	.	6.61888	13.9566	9.97649
chr11	53706680	53707324	H33_peak_914	39	.	4.50043	7.15588	3.90939
chr11	53706654	53707324	H33_peak_914	39	.	4.50043	7.15588	3.90939
chr11	53891568	53891819	H33_peak_915	42	.	4.84756	7.56378	4.20964
chr11	53891568	53891746	H33_peak_915	42	.	4.84756	7.56378	4.20964
chr11	53980181	53980352	H33_peak_916	40	.	4.47611	7.39219	4.0344
chr11	54438199	54438713	H33_peak_917	35	.	3.65932	6.91718	3.5796
chr11	54438199	54438664	H33_peak_917	35	.	3.65932	6.91718	3.5796
chr11	54522364	54523173	H33_peak_918	59	.	5.19005	9.51945	5.96998
chr11	54522339	54523164	H33_peak_918	59	.	5.19005	9.51945	5.96998
chr11	54787145	54787954	H33_peak_919	100	.	6.64321	14.0257	10.0394
chr11	54787145	54787982	H33_peak_919	100	.	6.64321	14.0257	10.0394
chr11	54866715	54866977	H33_peak_920	22	.	2.96207	5.38174	2.21359
chr11	54866715	54867001	H33_peak_920	22	.	2.96207	5.38174	2.21359
chr11	54955763	54956110	H33_peak_921	42	.	3.99486	7.67921	4.26339
chr11	54955763	54956110	H33_peak_921	42	.	3.99486	7.67921	4.26339
chr11	55097852	55098091	H33_peak_922	34	.	4.37407	6.70565	3.46684
chr11	55097887	55098091	H33_peak_922	34	.	4.37407	6.70565	3.46684
chr11	55460873	55461233	H33_peak_923	29	.	3.72705	6.10798	2.96296
chr11	55460805	55461233	H33_peak_923	29	.	3.72705	6.10798	2.96296
chr11	55469662	55469911	H33_peak_924	25	.	3.85852	5.60365	2.53628
chr11	55469662	55469911	H33_peak_924	25	.	3.85852	5.60365	2.53628
chr11	57518227	57518632	H33_peak_925	32	.	3.4993	6.55898	3.25911
chr11	57518227	57518632	H33_peak_925	32	.	3.4993	6.55898	3.25911
chr11	57827809	57827982	H33_peak_926	19	.	2.86949	4.8199	1.91072
chr11	57827777	57827902	H33_peak_926	19	.	2.86949	4.8199	1.91072
chr11	58103981	58104382	H33_peak_927	32	.	4.28178	6.43112	3.24264
chr11	58103981	58104382	H33_peak_927	32	.	4.28178	6.43112	3.24264
chr11	58168120	58168519	H33_peak_928	29	.	3.60478	6.1135	2.97494
chr11	58168120	58168519	H33_peak_928	29	.	3.60478	6.1135	2.97494
chr11	58307073	58307446	H33_peak_929	44	.	4.08807	7.86457	4.42287
chr11	58307019	58307446	H33_peak_929	44	.	4.08807	7.86457	4.42287
chr11	58322843	58323447	H33_peak_930	78	.	5.69382	11.6077	7.81333
chr11	58322819	58323447	H33_peak_930	78	.	5.69382	11.6077	7.81333
chr11	58903803	58904238	H33_peak_931	54	.	5.18993	8.85677	5.40932
chr11	58903976	58904238	H33_peak_931	54	.	5.18993	8.85677	5.40932
chr11	58960190	58960424	H33_peak_933	34	.	3.62345	6.81106	3.47668
chr11	58977255	58978456	H33_peak_934	25	.	3.11926	5.72145	2.51379
chr11	58977255	58978456	H33_peak_934	25	.	3.11926	5.72145	2.51379
chr11	59086509	59086834	H33_peak_935	21	.	2.90612	5.26082	2.10672
chr11	59163371	59163821	H33_peak_936	122	.	7.72901	16.3913	12.2202
chr11	59163354	59163821	H33_peak_936	122	.	7.72901	16.3913	12.2202
chr11	59176673	59176980	H33_peak_937	20	.	3.49653	4.99722	2.05706
chr11	59191796	59192129	H33_peak_938	34	.	4.50136	6.62238	3.40299
chr11	59191724	59192128	H33_peak_938	34	.	4.50136	6.62238	3.40299
chr11	59208270	59208791	H33_peak_939	41	.	3.9306	7.50806	4.10323
chr11	59208270	59208791	H33_peak_939	41	.	3.9306	7.50806	4.10323
chr11	59227951	59228521	H33_peak_940	56	.	5.18292	9.1301	5.64985
chr11	59227951	59228521	H33_peak_940	56	.	5.18292	9.1301	5.64985
chr11	59449967	59450309	H33_peak_942	36	.	3.82088	6.90506	3.67213
chr11	59450020	59450357	H33_peak_942	36	.	3.82088	6.90506	3.67213
chr11	59472146	59472400	H33_peak_943	19	.	2.88898	5.06568	1.99417
chr11	59472146	59472400	H33_peak_943	19	.	2.88898	5.06568	1.99417
chr11	59506016	59506460	H33_peak_944	64	.	5.05297	10.1194	6.45769
chr11	59506016	59506443	H33_peak_944	64	.	5.05297	10.1194	6.45769
chr11	59662142	59662512	H33_peak_945	38	.	3.81707	7.27035	3.89562
chr11	59662142	59662512	H33_peak_945	38	.	3.81707	7.27035	3.89562
chr11	59787215	59787660	H33_peak_946	41	.	4.86202	7.47696	4.15373
chr11	59787355	59787660	H33_peak_946	41	.	4.86202	7.47696	4.15373
chr11	59809649	59810246	H33_peak_947	72	.	5.66528	10.9858	7.25977
chr11	59809649	59810159	H33_peak_947	72	.	5.66528	10.9858	7.25977
chr11	59839320	59839711	H33_peak_948	31	.	3.43878	6.41716	3.13025
chr11	59839320	59839711	H33_peak_948	31	.	3.43878	6.41716	3.13025
chr11	59947935	59948530	H33_peak_949	32	.	3.4792	6.51085	3.21507
chr11	59948137	59948463	H33_peak_949	32	.	3.4792	6.51085	3.21507
chr11	60115042	60115634	H33_peak_950	43	.	4.05237	7.71981	4.31832
chr11	60115041	60115607	H33_peak_950	43	.	4.05237	7.71981	4.31832
chr11	60139725	60139899	H33_peak_951	36	.	3.72469	6.99746	3.67522
chr11	60210264	60210591	H33_peak_952	73	.	5.4834	11.12	7.35969
chr11	60210380	60210591	H33_peak_952	73	.	5.4834	11.12	7.35969
chr11	60220345	60220583	H33_peak_953	67	.	5.23045	10.4799	6.77534
chr11	60222764	60223000	H33_peak_954	35	.	3.64855	6.85923	3.5256
chr11	60222764	60222980	H33_peak_954	35	.	3.64855	6.85923	3.5256
chr11	60352528	60353001	H33_peak_955	31	.	4.17372	6.34853	3.16913
chr11	60352628	60353001	H33_peak_955	31	.	4.17372	6.34853	3.16913
chr11	60537203	60538313	H33_peak_956	57	.	4.93896	9.21424	5.70581
chr11	60537534	60538313	H33_peak_956	57	.	4.93896	9.21424	5.70581
chr11	60699562	60700122	H33_peak_957	38	.	3.78576	7.21903	3.85438
chr11	60699763	60700062	H33_peak_957	38	.	3.78576	7.21903	3.85438
chr11	60727024	60727286	H33_peak_958	21	.	2.90396	5.23058	2.10672
chr11	60727024	60727286	H33_peak_958	21	.	2.90396	5.23058	2.10672
chr11	60811121	60811267	H33_peak_959	26	.	3.66345	5.7001	2.64264
chr11	60878324	60879312	H33_peak_960	41	.	3.97236	7.60405	4.18968
chr11	60878343	60879117	H33_peak_960	41	.	3.97236	7.60405	4.18968
chr11	60931928	60932323	H33_peak_961	51	.	4.45114	8.68439	5.15849
chr11	60931928	60932323	H33_peak_961	51	.	4.45114	8.68439	5.15849
chr11	61022196	61022559	H33_peak_962	18	.	2.99433	4.76264	1.84518
chr11	61174996	61175327	H33_peak_963	44	.	4.11187	7.90019	4.44988
chr11	61174996	61175327	H33_peak_963	44	.	4.11187	7.90019	4.44988
chr11	61342579	61342900	H33_peak_964	35	.	3.64468	6.84726	3.51235
chr11	61342638	61342900	H33_peak_964	35	.	3.64468	6.84726	3.51235
chr11	61493961	61494469	H33_peak_965	69	.	5.31644	10.696	6.97232
chr11	61493961	61494469	H33_peak_965	69	.	5.31644	10.696	6.97232
chr11	61579285	61579726	H33_peak_966	51	.	4.86818	8.5196	5.13709
chr11	61579285	61579726	H33_peak_966	51	.	4.86818	8.5196	5.13709
chr11	61854395	61855329	H33_peak_967	22	.	3.09059	5.38085	2.22862
chr11	61854460	61855329	H33_peak_967	22	.	3.09059	5.38085	2.22862
chr11	62076770	62077584	H33_peak_968	86	.	6.0078	12.4783	8.62612
chr11	62076762	62077528	H33_peak_968	86	.	6.0078	12.4783	8.62612
chr11	62281167	62281661	H33_peak_969	41	.	4.14635	7.56958	4.19346
chr11	62457349	62457568	H33_peak_970	25	.	3.27596	5.6291	2.5606
chr11	62457349	62457568	H33_peak_970	25	.	3.27596	5.6291	2.5606
chr11	62538702	62539550	H33_peak_971	26	.	3.17873	5.84997	2.62736
chr11	62538702	62539462	H33_peak_971	26	.	3.17873	5.84997	2.62736
chr11	62602663	62603082	H33_peak_972	35	.	4.33129	6.79279	3.57375
chr11	62602643	62603082	H33_peak_972	35	.	4.33129	6.79279	3.57375
chr11	62731562	62731974	H33_peak_973	68	.	5.22913	10.5565	6.85931
chr11	62731562	62731974	H33_peak_973	68	.	5.22913	10.5565	6.85931
chr11	64979060	64979424	H33_peak_976	91	.	6.32852	13.1413	9.19742
chr11	64979060	64979424	H33_peak_976	91	.	6.32852	13.1413	9.19742
chr11	67052663	67053068	H33_peak_977	50	.	4.39146	8.5831	5.07587
chr11	67052663	67053050	H33_peak_977	50	.	4.39146	8.5831	5.07587
chr11	68385068	68385289	H33_peak_978	29	.	3.53829	6.07584	2.9421
chr11	68385068	68385289	H33_peak_978	29	.	3.53829	6.07584	2.9421
chr11	68691382	68693039	H33_peak_979	75	.	6.58928	11.1578	7.56516
chr11	68691382	68693065	H33_peak_979	75	.	6.58928	11.1578	7.56516
chr11	68852810	68853307	H33_peak_980	32	.	3.63153	6.53137	3.29603
chr11	68852810	68853284	H33_peak_980	32	.	3.63153	6.53137	3.29603
chr11	68967750	68968169	H33_peak_981	39	.	4.25695	7.22795	3.9374
chr11	68967750	68968169	H33_peak_981	39	.	4.25695	7.22795	3.9374
chr11	69059648	69060353	H33_peak_982	34	.	4.40936	6.71373	3.46072
chr11	69059648	69060353	H33_peak_982	34	.	4.40936	6.71373	3.46072
chr11	69088512	69088775	H33_peak_983	23	.	3.05863	5.59043	2.39801
chr11	69088512	69088775	H33_peak_983	23	.	3.05863	5.59043	2.39801
chr11	69340349	69341054	H33_peak_984	22	.	3.52539	5.27163	2.22851
chr11	69340349	69341054	H33_peak_984	22	.	3.52539	5.27163	2.22851
chr11	69368377	69368684	H33_peak_985	46	.	4.30265	8.04115	4.68277
chr11	69368205	69368684	H33_peak_985	46	.	4.30265	8.04115	4.68277
chr11	69397715	69397830	H33_peak_986	21	.	2.90612	5.26082	2.10672
chr11	69397699	69397830	H33_peak_986	21	.	2.90612	5.26082	2.10672
chr11	69399313	69400008	H33_peak_987	44	.	4.34306	7.74039	4.41833
chr11	69399313	69399924	H33_peak_987	44	.	4.34306	7.74039	4.41833
chr11	69404555	69405007	H33_peak_988	31	.	3.47658	6.21352	3.10298
chr11	69406297	69406545	H33_peak_989	21	.	2.90365	5.22622	2.10672
chr11	69406297	69406545	H33_peak_989	21	.	2.90365	5.22622	2.10672
chr11	69409265	69409563	H33_peak_990	37	.	3.75454	7.09437	3.72705
chr11	69409435	69409563	H33_peak_990	37	.	3.75454	7.09437	3.72705
chr11	69633180	69633492	H33_peak_991	65	.	5.11054	10.2729	6.59833
chr11	69633180	69633396	H33_peak_991	65	.	5.11054	10.2729	6.59833
chr11	69671443	69672132	H33_peak_992	24	.	3.72814	5.52179	2.46164
chr11	69671443	69672226	H33_peak_992	24	.	3.72814	5.52179	2.46164
chr11	69680167	69680505	H33_peak_993	39	.	3.87747	7.38837	3.99591
chr11	69680179	69680505	H33_peak_993	39	.	3.87747	7.38837	3.99591
chr11	69681564	69682215	H33_peak_994	76	.	5.59647	11.4183	7.6415
chr11	69681564	69682215	H33_peak_994	76	.	5.59647	11.4183	7.6415
chr11	69800780	69801095	H33_peak_995	21	.	2.90612	5.26082	2.10672
chr11	69800780	69801095	H33_peak_995	21	.	2.90612	5.26082	2.10672
chr11	69837339	69837348	H33_peak_996	14	.	2.81125	4.31944	1.45314
chr11	69837138	69837348	H33_peak_996	14	.	2.81125	4.31944	1.45314
chr11	69901543	69901930	H33_peak_997	39	.	4.09511	7.2211	3.92067
chr11	69901543	69901930	H33_peak_997	39	.	4.09511	7.2211	3.92067
chr11	69913904	69914589	H33_peak_998	62	.	4.88761	9.83416	6.22684
chr11	69913963	69914597	H33_peak_998	62	.	4.88761	9.83416	6.22684
chr11	69920423	69921613	H33_peak_999	47	.	4.24063	8.2464	4.77377
chr11	69920423	69921613	H33_peak_999	47	.	4.24063	8.2464	4.77377
chr11	69935407	69935798	H33_peak_1000	36	.	3.7362	6.8618	3.60784
chr11	69935407	69935798	H33_peak_1000	36	.	3.7362	6.8618	3.60784
chr11	69980708	69981449	H33_peak_1001	96	.	6.37506	13.5881	9.69676
chr11	69980708	69981449	H33_peak_1001	96	.	6.37506	13.5881	9.69676
chr11	69991532	69991803	H33_peak_1002	50	.	4.74618	8.53145	5.09291
chr11	69991510	69991738	H33_peak_1002	50	.	4.74618	8.53145	5.09291
chr11	69995735	69997563	H33_peak_1003	97	.	6.54449	13.7498	9.77797
chr11	69995735	69997563	H33_peak_1003	97	.	6.54449	13.7498	9.77797
chr11	70409804	70410270	H33_peak_1004	27	.	4.22434	5.88327	2.77163
chr11	70409797	70410115	H33_peak_1004	27	.	4.22434	5.88327	2.77163
chr11	70562817	70563065	H33_peak_1005	27	.	3.43153	5.78767	2.70066
chr11	70562817	70563065	H33_peak_1005	27	.	3.43153	5.78767	2.70066
chr11	70654133	70656276	H33_peak_1006	25	.	3.52565	5.67775	2.58248
chr11	70654133	70656271	H33_peak_1006	25	.	3.52565	5.67775	2.58248
chr11	70669337	70669721	H33_peak_1007	45	.	4.15369	8.01263	4.55629
chr11	70669338	70669728	H33_peak_1007	45	.	4.15369	8.01263	4.55629
chr11	70687748	70687969	H33_peak_1009	45	.	4.59235	7.8918	4.50262
chr11	70687748	70687969	H33_peak_1009	45	.	4.59235	7.8918	4.50262
chr11	70764401	70764629	H33_peak_1010	27	.	3.22902	5.95865	2.7234
chr11	70764401	70764479	H33_peak_1010	27	.	3.22902	5.95865	2.7234
chr11	71004081	71004480	H33_peak_1011	80	.	5.73594	11.8199	8.0225
chr11	71004180	71004439	H33_peak_1011	80	.	5.73594	11.8199	8.0225
chr11	71019010	71019885	H33_peak_1012	59	.	4.82249	9.53608	5.92425
chr11	71019010	71019885	H33_peak_1012	59	.	4.82249	9.53608	5.92425
chr11	71383834	71384307	H33_peak_1013	23	.	3.0158	5.37355	2.32638
chr11	71383834	71384307	H33_peak_1013	23	.	3.0158	5.37355	2.32638
chr11	71750925	71751318	H33_peak_1014	32	.	3.49321	6.5296	3.22795
chr11	71750925	71751234	H33_peak_1014	32	.	3.49321	6.5296	3.22795
chr11	72042328	72042438	H33_peak_1015	23	.	3.02066	5.50836	2.32548
chr11	72206748	72207472	H33_peak_1016	26	.	3.53343	5.72482	2.61247
chr11	72206875	72207472	H33_peak_1016	26	.	3.53343	5.72482	2.61247
chr11	72411278	72411701	H33_peak_1017	24	.	3.07953	5.63558	2.4379
chr11	72411278	72411701	H33_peak_1017	24	.	3.07953	5.63558	2.4379
chr11	72607032	72608456	H33_peak_1018	47	.	4.3186	8.20558	4.74454
chr11	72607032	72608456	H33_peak_1018	47	.	4.3186	8.20558	4.74454
chr11	72796149	72796762	H33_peak_1019	30	.	3.68722	6.23427	3.03552
chr11	72796149	72796762	H33_peak_1019	30	.	3.68722	6.23427	3.03552
chr11	73047769	73048269	H33_peak_1020	87	.	6.10154	12.596	8.75795
chr11	73047769	73048269	H33_peak_1020	87	.	6.10154	12.596	8.75795
chr11	73176518	73177850	H33_peak_1021	52	.	4.49356	8.77783	5.27851
chr11	73176609	73177889	H33_peak_1021	52	.	4.49356	8.77783	5.27851
chr11	73199409	73199834	H33_peak_1022	71	.	5.34825	10.837	7.11488
chr11	73199409	73199679	H33_peak_1022	71	.	5.34825	10.837	7.11488
chr11	74619533	74619868	H33_peak_1024	22	.	3.00054	5.46488	2.28705
chr11	74638384	74638407	H33_peak_1025	29	.	3.49123	6.07109	2.94846
chr11	74638384	74638487	H33_peak_1025	29	.	3.49123	6.07109	2.94846
chr11	74649532	74649914	H33_peak_1026	24	.	3.07827	5.63287	2.43551
chr11	74649532	74649914	H33_peak_1026	24	.	3.07827	5.63287	2.43551
chr11	74723382	74724596	H33_peak_1027	44	.	4.40036	7.85028	4.45668
chr11	74723382	74724596	H33_peak_1027	44	.	4.40036	7.85028	4.45668
chr11	74831064	74832430	H33_peak_1028	24	.	3.25241	5.5993	2.46501
chr11	74831064	74832430	H33_peak_1028	24	.	3.25241	5.5993	2.46501
chr11	74837756	74838724	H33_peak_1029	52	.	5.4769	8.65021	5.21043
chr11	74837756	74838634	H33_peak_1029	52	.	5.4769	8.65021	5.21043
chr11	74925826	74926368	H33_peak_1031	33	.	3.64504	6.5527	3.38958
chr11	74925826	74926292	H33_peak_1031	33	.	3.64504	6.5527	3.38958
chr11	75173220	75173575	H33_peak_1032	21	.	2.90612	5.26082	2.10672
chr11	75173397	75173575	H33_peak_1032	21	.	2.90612	5.26082	2.10672
chr11	75348080	75348619	H33_peak_1033	20	.	3.00293	5.05133	2.00512
chr11	75348080	75348619	H33_peak_1033	20	.	3.00293	5.05133	2.00512
chr11	75461526	75462072	H33_peak_1034	21	.	2.90612	5.26082	2.10672
chr11	75461526	75462072	H33_peak_1034	21	.	2.90612	5.26082	2.10672
chr11	75486740	75487233	H33_peak_1035	129	.	8.64438	16.9296	12.9163
chr11	75486735	75487073	H33_peak_1035	129	.	8.64438	16.9296	12.9163
chr11	75531226	75532038	H33_peak_1037	57	.	4.87637	9.15524	5.7137
chr11	75531226	75532143	H33_peak_1037	57	.	4.87637	9.15524	5.7137
chr11	75588153	75588541	H33_peak_1038	25	.	3.95219	5.66056	2.58286
chr11	75588153	75588538	H33_peak_1038	25	.	3.95219	5.66056	2.58286
chr11	75630737	75631040	H33_peak_1039	40	.	3.90359	7.46083	4.06505
chr11	75630737	75631040	H33_peak_1039	40	.	3.90359	7.46083	4.06505
chr11	75654132	75654418	H33_peak_1040	45	.	4.14579	7.996	4.54174
chr11	75654132	75654418	H33_peak_1040	45	.	4.14579	7.996	4.54174
chr11	75655831	75656331	H33_peak_1041	43	.	4.07615	7.69657	4.3329
chr11	75655667	75656331	H33_peak_1041	43	.	4.07615	7.69657	4.3329
chr11	75679327	75679986	H33_peak_1042	31	.	3.45655	6.46372	3.174
chr11	75679327	75680020	H33_peak_1042	31	.	3.45655	6.46372	3.174
chr11	75732595	75733545	H33_peak_1043	38	.	4.17546	7.09625	3.80379
chr11	75732595	75733545	H33_peak_1043	38	.	4.17546	7.09625	3.80379
chr11	75967078	75967306	H33_peak_1044	63	.	5.03458	10.0363	6.37911
chr11	76217235	76217561	H33_peak_1045	50	.	5.00344	8.50708	5.0978
chr11	76217296	76217561	H33_peak_1045	50	.	5.00344	8.50708	5.0978
chr11	76243458	76243934	H33_peak_1046	25	.	3.15847	5.80618	2.58866
chr11	76243458	76243934	H33_peak_1046	25	.	3.15847	5.80618	2.58866
chr11	76398610	76399267	H33_peak_1047	24	.	3.08928	5.65666	2.45653
chr11	76398610	76399267	H33_peak_1047	24	.	3.08928	5.65666	2.45653
chr11	76622852	76623507	H33_peak_1048	21	.	2.90545	5.25329	2.10238
chr11	76622852	76623292	H33_peak_1048	21	.	2.90545	5.25329	2.10238
chr11	77216065	77216571	H33_peak_1051	35	.	3.91097	6.81534	3.55092
chr11	77216065	77216571	H33_peak_1051	35	.	3.91097	6.81534	3.55092
chr11	77347998	77348433	H33_peak_1052	51	.	4.44936	8.6926	5.16584
chr11	77347998	77348433	H33_peak_1052	51	.	4.44936	8.6926	5.16584
chr11	77506244	77506546	H33_peak_1053	43	.	4.05548	7.77892	4.3429
chr11	77506235	77506546	H33_peak_1053	43	.	4.05548	7.77892	4.3429
chr11	77515077	77515594	H33_peak_1054	31	.	3.50828	6.38221	3.12725
chr11	77515429	77515594	H33_peak_1054	31	.	3.50828	6.38221	3.12725
chr11	77607324	77607823	H33_peak_1055	41	.	4.77282	7.47757	4.13729
chr11	77607618	77607823	H33_peak_1055	41	.	4.77282	7.47757	4.13729
chr11	77686317	77687746	H33_peak_1056	40	.	3.92196	7.41881	4.03696
chr11	77686317	77687746	H33_peak_1056	40	.	3.92196	7.41881	4.03696
chr11	77982330	77983122	H33_peak_1057	41	.	3.9629	7.52873	4.16038
chr11	77982330	77983122	H33_peak_1057	41	.	3.9629	7.52873	4.16038
chr11	78178622	78178887	H33_peak_1058	32	.	3.48368	6.50901	3.20976
chr11	78178622	78178887	H33_peak_1058	32	.	3.48368	6.50901	3.20976
chr11	78188596	78189421	H33_peak_1059	39	.	4.04659	7.32012	3.97483
chr11	78188741	78188970	H33_peak_1059	39	.	4.04659	7.32012	3.97483
chr11	78261376	78262221	H33_peak_1060	41	.	3.96498	7.59083	4.17908
chr11	78261376	78262221	H33_peak_1060	41	.	3.96498	7.59083	4.17908
chr11	78301517	78301975	H33_peak_1061	67	.	5.20309	10.4636	6.76556
chr11	78301589	78301975	H33_peak_1061	67	.	5.20309	10.4636	6.76556
chr11	78328418	78328708	H33_peak_1062	33	.	3.54852	6.64913	3.33358
chr11	78328418	78328708	H33_peak_1062	33	.	3.54852	6.64913	3.33358
chr11	78512240	78512496	H33_peak_1064	33	.	4.167	6.5659	3.36085
chr11	78512240	78512496	H33_peak_1064	33	.	4.167	6.5659	3.36085
chr11	78697089	78697535	H33_peak_1065	47	.	5.02547	8.21633	4.78345
chr11	78697089	78697535	H33_peak_1065	47	.	5.02547	8.21633	4.78345
chr11	78826442	78826853	H33_peak_1066	95	.	6.43446	13.5108	9.56521
chr11	78826659	78826853	H33_peak_1066	95	.	6.43446	13.5108	9.56521
chr11	79146273	79146413	H33_peak_1067	29	.	3.33615	6.19017	2.928
chr11	79146199	79146413	H33_peak_1067	29	.	3.33615	6.19017	2.928
chr11	79254070	79254719	H33_peak_1068	32	.	3.51174	6.5904	3.28831
chr11	79254070	79254719	H33_peak_1068	32	.	3.51174	6.5904	3.28831
chr11	79660473	79660682	H33_peak_1070	49	.	4.91584	8.39569	4.99318
chr11	79660469	79660682	H33_peak_1070	49	.	4.91584	8.39569	4.99318
chr11	79704266	79704727	H33_peak_1071	40	.	3.92315	7.48748	4.08361
chr11	79704266	79704668	H33_peak_1071	40	.	3.92315	7.48748	4.08361
chr11	79992846	79993632	H33_peak_1073	29	.	3.50699	6.16475	2.9573
chr11	79992846	79993632	H33_peak_1073	29	.	3.50699	6.16475	2.9573
chr11	80080761	80080908	H33_peak_1074	35	.	3.95165	6.804	3.59943
chr11	80080663	80080908	H33_peak_1074	35	.	3.95165	6.804	3.59943
chr11	80089531	80089734	H33_peak_1075	43	.	4.06093	7.80174	4.3666
chr11	80089531	80089734	H33_peak_1075	43	.	4.06093	7.80174	4.3666
chr11	80208954	80209249	H33_peak_1076	41	.	4.80979	7.43781	4.11808
chr11	80209058	80209249	H33_peak_1076	41	.	4.80979	7.43781	4.11808
chr11	80377777	80378044	H33_peak_1077	31	.	3.43945	6.41341	3.12528
chr11	80377777	80378044	H33_peak_1077	31	.	3.43945	6.41341	3.12528
chr11	80428614	80429057	H33_peak_1078	55	.	5.13954	9.06633	5.56144
chr11	80428661	80429057	H33_peak_1078	55	.	5.13954	9.06633	5.56144
chr11	80477045	80477364	H33_peak_1079	42	.	4.34472	7.53784	4.21764
chr11	80477045	80477364	H33_peak_1079	42	.	4.34472	7.53784	4.21764
chr11	81152373	81152595	H33_peak_1080	21	.	2.90612	5.26082	2.10672
chr11	82781217	82781725	H33_peak_1082	27	.	3.22902	5.95865	2.7234
chr11	82781217	82781725	H33_peak_1082	27	.	3.22902	5.95865	2.7234
chr11	82870963	82871296	H33_peak_1083	39	.	4.5212	7.23948	3.94339
chr11	82930238	82930381	H33_peak_1084	32	.	3.4908	6.52438	3.22335
chr11	83298630	83299068	H33_peak_1085	107	.	7.88519	14.8116	10.7857
chr11	83298649	83298965	H33_peak_1085	107	.	7.88519	14.8116	10.7857
chr11	83302700	83302907	H33_peak_1086	31	.	3.45364	6.44409	3.15239
chr11	83302707	83302907	H33_peak_1086	31	.	3.45364	6.44409	3.15239
chr11	83462906	83462992	H33_peak_1087	21	.	2.90612	5.26082	2.10672
chr11	83472987	83473738	H33_peak_1088	45	.	4.13796	7.98172	4.52904
chr11	83472987	83473606	H33_peak_1088	45	.	4.13796	7.98172	4.52904
chr11	83753755	83754101	H33_peak_1089	44	.	4.43972	7.77026	4.4423
chr11	83753755	83754025	H33_peak_1089	44	.	4.43972	7.77026	4.4423
chr11	84513261	84513425	H33_peak_1090	21	.	2.90612	5.26082	2.10672
chr11	84513302	84513425	H33_peak_1090	21	.	2.90612	5.26082	2.10672
chr11	84828719	84829165	H33_peak_1091	28	.	3.83034	5.99841	2.88542
chr11	84828719	84829165	H33_peak_1091	28	.	3.83034	5.99841	2.88542
chr11	84869740	84870920	H33_peak_1092	44	.	4.07334	7.86264	4.42985
chr11	84869740	84870920	H33_peak_1092	44	.	4.07334	7.86264	4.42985
chr11	84879724	84880139	H33_peak_1093	43	.	4.06623	7.83147	4.3977
chr11	84879940	84880139	H33_peak_1093	43	.	4.06623	7.83147	4.3977
chr11	84893320	84893703	H33_peak_1094	22	.	2.9997	5.46306	2.28545
chr11	84893320	84893649	H33_peak_1094	22	.	2.9997	5.46306	2.28545
chr11	85139451	85140524	H33_peak_1095	74	.	5.84315	11.1337	7.44191
chr11	85139583	85140524	H33_peak_1095	74	.	5.84315	11.1337	7.44191
chr11	85234474	85235073	H33_peak_1097	20	.	2.99852	5.02878	2.00377
chr11	85234474	85235073	H33_peak_1097	20	.	2.99852	5.02878	2.00377
chr11	86200757	86201225	H33_peak_1100	77	.	5.87695	11.5129	7.73615
chr11	86200757	86201182	H33_peak_1100	77	.	5.87695	11.5129	7.73615
chr11	86357245	86358358	H33_peak_1101	40	.	4.31822	7.38063	4.02079
chr11	86357245	86358358	H33_peak_1101	40	.	4.31822	7.38063	4.02079
chr11	86544155	86544885	H33_peak_1102	62	.	4.92141	9.88628	6.26763
chr11	86544170	86544871	H33_peak_1102	62	.	4.92141	9.88628	6.26763
chr11	86683644	86683863	H33_peak_1103	21	.	2.90365	5.22622	2.10672
chr11	86683644	86683863	H33_peak_1103	21	.	2.90365	5.22622	2.10672
chr11	86757314	86758171	H33_peak_1104	53	.	4.54147	8.92245	5.37935
chr11	86757314	86758171	H33_peak_1104	53	.	4.54147	8.92245	5.37935
chr11	86807603	86807880	H33_peak_1105	53	.	4.56733	8.86129	5.32789
chr11	86807603	86807632	H33_peak_1105	53	.	4.56733	8.86129	5.32789
chr11	86993377	86993985	H33_peak_1106	63	.	5.7002	9.9549	6.35876
chr11	86993377	86994009	H33_peak_1106	63	.	5.7002	9.9549	6.35876
chr11	87073917	87074270	H33_peak_1107	49	.	4.309	8.42641	4.93977
chr11	87073839	87074250	H33_peak_1107	49	.	4.309	8.42641	4.93977
chr11	87109809	87110044	H33_peak_1108	56	.	4.65294	9.15969	5.63957
chr11	87127404	87127634	H33_peak_1109	25	.	3.244	5.68865	2.5727
chr11	87127404	87127634	H33_peak_1109	25	.	3.244	5.68865	2.5727
chr11	87358846	87359180	H33_peak_1110	30	.	3.38177	6.28876	3.01512
chr11	87358846	87359180	H33_peak_1110	30	.	3.38177	6.28876	3.01512
chr11	87404167	87404640	H33_peak_1111	51	.	4.43683	8.65569	5.13363
chr11	87404166	87404640	H33_peak_1111	51	.	4.43683	8.65569	5.13363
chr11	87448156	87448546	H33_peak_1112	25	.	3.85373	5.58184	2.52191
chr11	87448295	87448546	H33_peak_1112	25	.	3.85373	5.58184	2.52191
chr11	87592122	87592442	H33_peak_1113	104	.	8.37744	14.4634	10.4592
chr11	87592122	87592442	H33_peak_1113	104	.	8.37744	14.4634	10.4592
chr11	87853107	87853390	H33_peak_1114	27	.	3.2543	6.0133	2.77169
chr11	87852962	87853408	H33_peak_1114	27	.	3.2543	6.0133	2.77169
chr11	87987271	87987477	H33_peak_1115	36	.	3.98639	6.86571	3.64307
chr11	87987271	87987477	H33_peak_1115	36	.	3.98639	6.86571	3.64307
chr11	88047705	88048629	H33_peak_1116	21	.	3.03917	5.1596	2.1977
chr11	88047705	88048629	H33_peak_1116	21	.	3.03917	5.1596	2.1977
chr11	88068287	88069155	H33_peak_1117	42	.	4.75899	7.52333	4.22547
chr11	88068287	88069155	H33_peak_1117	42	.	4.75899	7.52333	4.22547
chr11	88718413	88718638	H33_peak_1119	23	.	3.04389	5.55856	2.36984
chr11	88718413	88718638	H33_peak_1119	23	.	3.04389	5.55856	2.36984
chr11	89060432	89061008	H33_peak_1120	75	.	5.51075	11.2939	7.54906
chr11	89060432	89060918	H33_peak_1120	75	.	5.51075	11.2939	7.54906
chr11	89301942	89302467	H33_peak_1121	23	.	3.02318	5.51381	2.33029
chr11	89301942	89302467	H33_peak_1121	23	.	3.02318	5.51381	2.33029
chr11	90638114	90638651	H33_peak_1122	25	.	3.13267	5.75042	2.53939
chr11	90638114	90638651	H33_peak_1122	25	.	3.13267	5.75042	2.53939
chr11	93885100	93886626	H33_peak_1123	69	.	5.51485	10.6284	6.96778
chr11	93885100	93886626	H33_peak_1123	69	.	5.51485	10.6284	6.96778
chr11	94210850	94212087	H33_peak_1124	50	.	5.00695	8.44599	5.03997
chr11	94210850	94212087	H33_peak_1124	50	.	5.00695	8.44599	5.03997
chr11	94321350	94322247	H33_peak_1125	67	.	5.81419	10.3752	6.79935
chr11	94321366	94322256	H33_peak_1125	67	.	5.81419	10.3752	6.79935
chr11	94327968	94328077	H33_peak_1126	21	.	2.90612	5.26082	2.10672
chr11	94473540	94473857	H33_peak_1127	26	.	3.19642	5.8882	2.66115
chr11	94521266	94521510	H33_peak_1128	27	.	3.25548	6.01585	2.77395
chr11	94521266	94521440	H33_peak_1128	27	.	3.25548	6.01585	2.77395
chr11	94928931	94929186	H33_peak_1129	21	.	2.90577	5.25594	2.10672
chr11	94992120	94992398	H33_peak_1130	19	.	2.87337	4.86042	1.95049
chr11	94992120	94992398	H33_peak_1130	19	.	2.87337	4.86042	1.95049
chr11	95020107	95020234	H33_peak_1131	29	.	3.88998	6.06227	2.94896
chr11	95309852	95310230	H33_peak_1133	99	.	6.64255	13.9087	9.90098
chr11	95309852	95310230	H33_peak_1133	99	.	6.64255	13.9087	9.90098
chr11	95336955	95337196	H33_peak_1134	38	.	3.93695	7.19878	3.88156
chr11	95337033	95337196	H33_peak_1134	38	.	3.93695	7.19878	3.88156
chr11	95712413	95712916	H33_peak_1135	57	.	4.68662	9.30132	5.77281
chr11	95712508	95712916	H33_peak_1135	57	.	4.68662	9.30132	5.77281
chr11	96006832	96007151	H33_peak_1136	19	.	2.90915	4.93112	1.93694
chr11	96006841	96007151	H33_peak_1136	19	.	2.90915	4.93112	1.93694
chr11	96124246	96124486	H33_peak_1138	23	.	3.03124	5.53123	2.34569
chr11	96272483	96272715	H33_peak_1139	21	.	2.90612	5.26082	2.10672
chr11	96777448	96777840	H33_peak_1140	83	.	7.12034	12.1564	8.38527
chr11	96777448	96777840	H33_peak_1140	83	.	7.12034	12.1564	8.38527
chr11	96789024	96789619	H33_peak_1141	88	.	6.11505	12.691	8.80542
chr11	96789024	96789619	H33_peak_1141	88	.	6.11505	12.691	8.80542
chr11	96977161	96977848	H33_peak_1142	108	.	8.90095	14.8092	10.8161
chr11	96977161	96977848	H33_peak_1142	108	.	8.90095	14.8092	10.8161
chr11	97041457	97041803	H33_peak_1143	35	.	4.17473	6.82979	3.56355
chr11	97041457	97041803	H33_peak_1143	35	.	4.17473	6.82979	3.56355
chr11	97114968	97115190	H33_peak_1144	17	.	2.85429	4.67076	1.76639
chr11	97150665	97151089	H33_peak_1145	48	.	4.3003	8.36629	4.88456
chr11	97150665	97151054	H33_peak_1145	48	.	4.3003	8.36629	4.88456
chr11	97187071	97188562	H33_peak_1146	101	.	6.72376	14.2003	10.1924
chr11	97187071	97188562	H33_peak_1146	101	.	6.72376	14.2003	10.1924
chr11	97362192	97362513	H33_peak_1147	21	.	2.90612	5.26082	2.10672
chr11	97362192	97362513	H33_peak_1147	21	.	2.90612	5.26082	2.10672
chr11	97415568	97416138	H33_peak_1148	26	.	3.29221	5.74127	2.60292
chr11	97415568	97416138	H33_peak_1148	26	.	3.29221	5.74127	2.60292
chr11	97451726	97451848	H33_peak_1149	21	.	2.90612	5.26082	2.10672
chr11	97451476	97451848	H33_peak_1149	21	.	2.90612	5.26082	2.10672
chr11	97500217	97500639	H33_peak_1150	22	.	3.40643	5.22461	2.22528
chr11	97500541	97500639	H33_peak_1150	22	.	3.40643	5.22461	2.22528
chr11	97536933	97537274	H33_peak_1151	21	.	2.90612	5.26082	2.10672
chr11	97573794	97574812	H33_peak_1152	21	.	2.90612	5.26082	2.10672
chr11	97573918	97574812	H33_peak_1152	21	.	2.90612	5.26082	2.10672
chr11	97663232	97663660	H33_peak_1154	21	.	2.90612	5.26082	2.10672
chr11	97699300	97699439	H33_peak_1155	22	.	3.25697	5.20657	2.21273
chr11	97698901	97699439	H33_peak_1155	22	.	3.25697	5.20657	2.21273
chr11	97744334	97744668	H33_peak_1156	22	.	3.16584	5.23233	2.23013
chr11	97799424	97799767	H33_peak_1157	20	.	3.37355	4.94035	2.00622
chr11	97799684	97799767	H33_peak_1157	20	.	3.37355	4.94035	2.00622
chr11	98026908	98027315	H33_peak_1159	160	.	10.3417	20.3876	16.0191
chr11	98026908	98027315	H33_peak_1159	160	.	10.3417	20.3876	16.0191
chr11	98149039	98150655	H33_peak_1160	66	.	5.16107	10.373	6.69585
chr11	98149150	98150655	H33_peak_1160	66	.	5.16107	10.373	6.69585
chr11	98192957	98193342	H33_peak_1161	65	.	6.04628	10.2301	6.5959
chr11	98192967	98193241	H33_peak_1161	65	.	6.04628	10.2301	6.5959
chr11	98202765	98203267	H33_peak_1162	68	.	5.96419	10.481	6.82771
chr11	98202765	98203267	H33_peak_1162	68	.	5.96419	10.481	6.82771
chr11	98294706	98294917	H33_peak_1163	21	.	2.90612	5.26082	2.10672
chr11	98328477	98328697	H33_peak_1164	21	.	2.90612	5.26082	2.10672
chr11	98328477	98328570	H33_peak_1164	21	.	2.90612	5.26082	2.10672
chr11	98348921	98349058	H33_peak_1165	24	.	3.0791	5.63466	2.43709
chr11	98358309	98358598	H33_peak_1166	65	.	6.13174	10.0953	6.52654
chr11	98358335	98358598	H33_peak_1166	65	.	6.13174	10.0953	6.52654
chr11	98400163	98400551	H33_peak_1167	84	.	5.96203	12.2725	8.41067
chr11	98457927	98458275	H33_peak_1169	27	.	3.22055	5.94034	2.70722
chr11	98457927	98458122	H33_peak_1169	27	.	3.22055	5.94034	2.70722
chr11	98794693	98796403	H33_peak_1170	45	.	4.35508	7.90421	4.51511
chr11	98794693	98796403	H33_peak_1170	45	.	4.35508	7.90421	4.51511
chr11	98809614	98810068	H33_peak_1171	61	.	5.59426	9.78113	6.17995
chr11	98809614	98810068	H33_peak_1171	61	.	5.59426	9.78113	6.17995
chr11	98937679	98938251	H33_peak_1172	29	.	3.55989	6.11529	2.99133
chr11	98937590	98938276	H33_peak_1172	29	.	3.55989	6.11529	2.99133
chr11	98963589	98963915	H33_peak_1173	50	.	4.41101	8.61102	5.09394
chr11	98963658	98963916	H33_peak_1173	50	.	4.41101	8.61102	5.09394
chr11	98982141	98982322	H33_peak_1174	21	.	2.90612	5.26082	2.10672
chr11	98982173	98982322	H33_peak_1174	21	.	2.90612	5.26082	2.10672
chr11	99023917	99024185	H33_peak_1175	42	.	4.47255	7.57055	4.22733
chr11	99023863	99024185	H33_peak_1175	42	.	4.47255	7.57055	4.22733
chr11	99230285	99230923	H33_peak_1176	38	.	3.95303	7.17865	3.85309
chr11	99230337	99230923	H33_peak_1176	38	.	3.95303	7.17865	3.85309
chr11	99385944	99386346	H33_peak_1177	89	.	6.20501	12.8388	8.92254
chr11	99385944	99386346	H33_peak_1177	89	.	6.20501	12.8388	8.92254
chr11	99705006	99705189	H33_peak_1178	21	.	2.90612	5.26082	2.10672
chr11	100319614	100320444	H33_peak_1181	59	.	5.72846	9.4528	5.92393
chr11	100319614	100320444	H33_peak_1181	59	.	5.72846	9.4528	5.92393
chr11	100355838	100356142	H33_peak_1182	42	.	4.03052	7.57606	4.28324
chr11	100355838	100356111	H33_peak_1182	42	.	4.03052	7.57606	4.28324
chr11	100472651	100472851	H33_peak_1183	38	.	4.61519	7.11997	3.83349
chr11	100472651	100472865	H33_peak_1183	38	.	4.61519	7.11997	3.83349
chr11	100527636	100528308	H33_peak_1184	52	.	5.24871	8.73798	5.27393
chr11	100527636	100528308	H33_peak_1184	52	.	5.24871	8.73798	5.27393
chr11	100574902	100575117	H33_peak_1185	19	.	2.88514	5.01375	1.99272
chr11	100574876	100575111	H33_peak_1185	19	.	2.88514	5.01375	1.99272
chr11	100619607	100619834	H33_peak_1186	42	.	4.95584	7.55147	4.22834
chr11	100619607	100619834	H33_peak_1186	42	.	4.95584	7.55147	4.22834
chr11	100622863	100623266	H33_peak_1187	51	.	4.39744	8.64307	5.13748
chr11	100622863	100623252	H33_peak_1187	51	.	4.39744	8.64307	5.13748
chr11	100737952	100738228	H33_peak_1188	46	.	5.03339	8.03072	4.62704
chr11	100737952	100738228	H33_peak_1188	46	.	5.03339	8.03072	4.62704
chr11	100939119	100939339	H33_peak_1189	36	.	3.73392	7.04979	3.68765
chr11	100939119	100939339	H33_peak_1189	36	.	3.73392	7.04979	3.68765
chr11	101009407	101009718	H33_peak_1190	42	.	4.78224	7.64296	4.28873
chr11	101070096	101070604	H33_peak_1191	26	.	3.20841	5.9141	2.68404
chr11	101070096	101070602	H33_peak_1191	26	.	3.20841	5.9141	2.68404
[truncated: 10,184 more rows]
