# Supplementary figures and images for: ARID1A governs the silencing of sex-linked transcription during male meiosis in the mouse
Source: eLife journal article supplement (doi:10.7554/elife.88024), 2023-07-07

Fig. S2A full Western blots

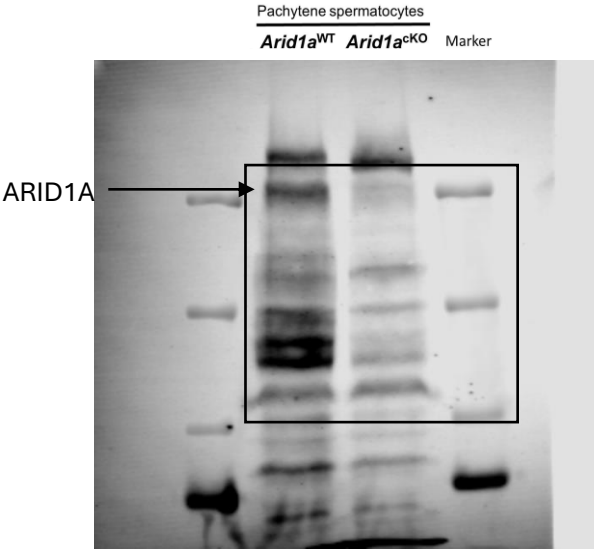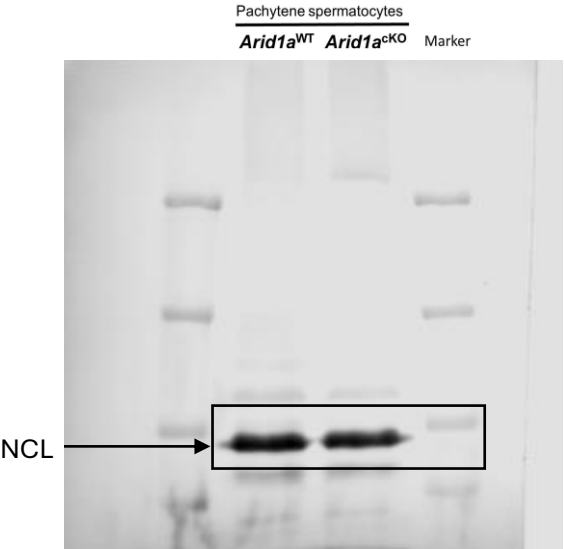

Supplement: fig2-figsupp1-data2 [file elife-88024-fig2-figsupp1-data2-v1.zip]

Figure 2-Figure Supplement 3-Source Data 2

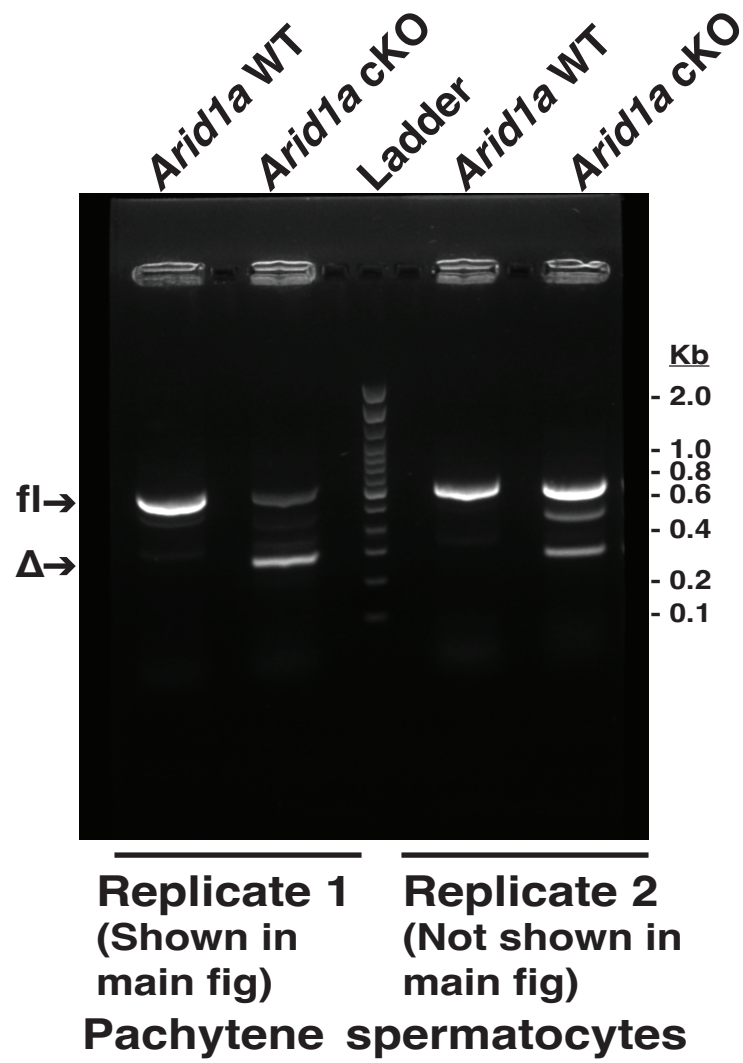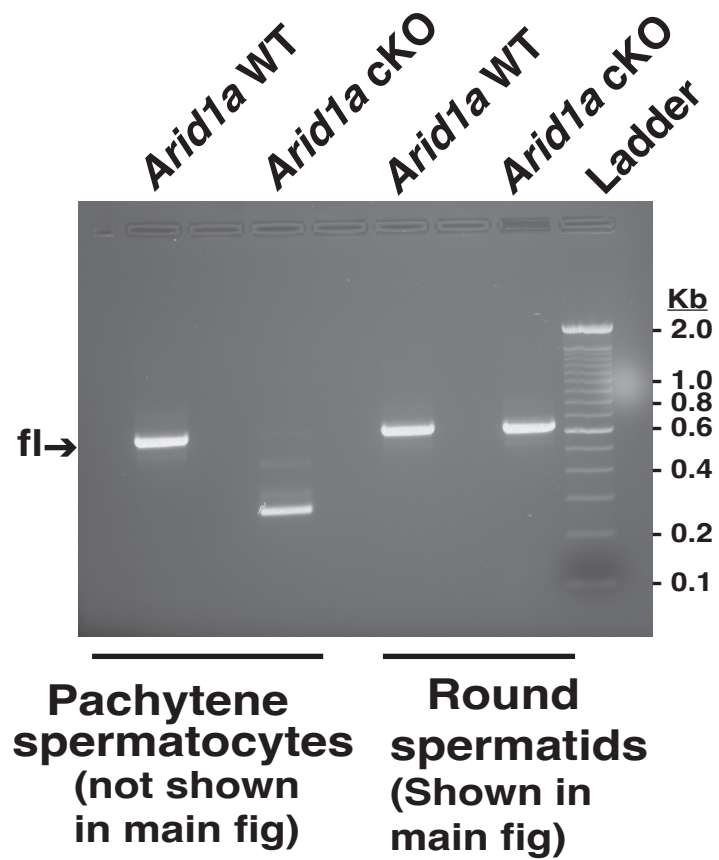

Supplement: fig2-figsupp3-data2 [file elife-88024-fig2-figsupp3-data2-v1.zip]
